# Supplementary material for: Aging and Light Stress Result in Overlapping and Unique Gene Expression Changes in Photoreceptors
Source: MDPI journal article supplement (doi:10.3390/genes13020264), 2022-01-29
Supplement: s1 [file s1]

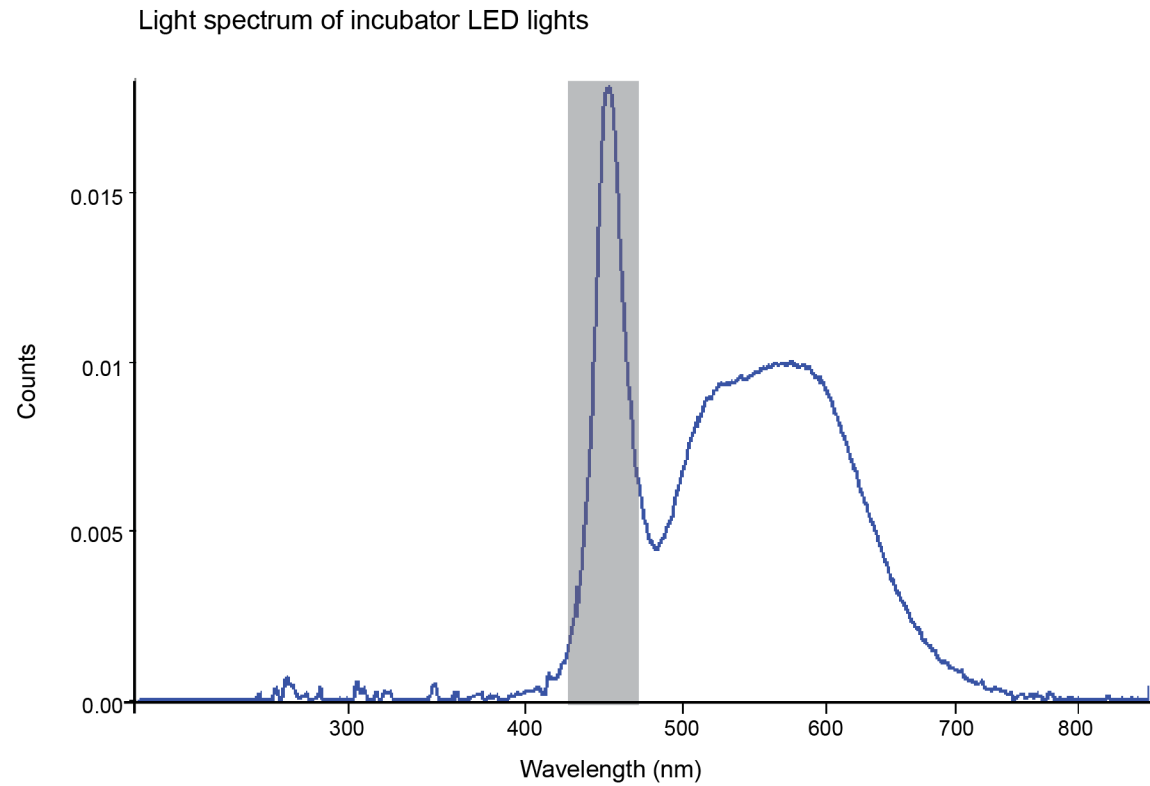

**Figure S1:** Light spectrum of 12:12 *Drosophila* incubator. Visible is the blue light peak, followed by the broad peak in the visible spectrum indicative of white LEDs. Grey shading represents the primary excitation wavelengths of GFP.
