# Supplementary material for: Aging and Light Stress Result in Overlapping and Unique Gene Expression Changes in Photoreceptors
Source: Genes (Basel). 2022 Jan 29;13(2):264. doi: 10.3390/genes13020264 (PMC8872477; doi:10.3390/genes13020264)
Supplement: Supplementary file 1 [file genes-13-00264-s001.zip › Table S1.xlsx]

## Sheet: 3h
	genes	FbgnID	symbol	logFC	unshrunk.logFC	logCPM	PValue	FDR
FBgn0030082	FBgn0030082	FBgn0030082	HP1b	2.77077	2.77146	5.172	5.9799e-58	4.74146e-54
FBgn0265052	FBgn0265052	FBgn0265052	St3	2.38255	2.38347	4.30924	7.21257e-29	2.85942e-25
FBgn0029838	FBgn0029838	FBgn0029838	CG4666	2.26312	2.26458	4.20196	1.77193e-28	4.68322e-25
FBgn0030477	FBgn0030477	FBgn0030477	dmrt11E	2.60986	2.61311	3.17645	4.49215e-28	8.90457e-25
FBgn0003499	FBgn0003499	FBgn0003499	sr	-1.79755	-1.79778	6.24118	9.42539e-24	1.49468e-20
FBgn0039494	FBgn0039494	FBgn0039494	grass	2.0701	2.07051	5.36193	3.60021e-23	4.75768e-20
FBgn0026439	FBgn0026439	FBgn0026439	Eaat1	1.89728	1.89732	8.16254	4.82148e-23	5.46136e-20
FBgn0029835	FBgn0029835	FBgn0029835	CG5921	1.76488	1.76506	6.54806	1.41833e-22	1.40575e-19
FBgn0052707	FBgn0052707	FBgn0052707	APC4	2.54977	2.55034	5.2832	1.75036e-22	1.54207e-19
FBgn0036186	FBgn0036186	FBgn0036186	CG6071	-1.9886	-1.99136	3.58752	4.85272e-22	3.84772e-19
FBgn0036187	FBgn0036187	FBgn0036187	RIOK1	-2.34592	-2.34968	3.86812	1.69006e-21	1.21823e-18
FBgn0010382	FBgn0010382	FBgn0010382	CycE	1.91642	1.91733	4.01556	5.22e-21	3.44911e-18
FBgn0053003	FBgn0053003	FBgn0053003	CG33003	4.48379	4.4868	5.26425	4.50101e-20	2.74527e-17
FBgn0038815	FBgn0038815	FBgn0038815	CG5466	1.85527	1.856	4.30195	2.86669e-19	1.62357e-16
FBgn0026143	FBgn0026143	FBgn0026143	CDC45L	1.70723	1.70811	4.14794	1.81432e-18	9.5905e-16
FBgn0038057	FBgn0038057	FBgn0038057	CG12267	1.9946	1.99594	3.86759	3.52872e-18	1.7487e-15
FBgn0033936	FBgn0033936	FBgn0033936	Achl	2.59524	2.59529	8.81552	1.5504e-17	6.98636e-15
FBgn0031286	FBgn0031286	FBgn0031286	CG3862	1.81977	1.82085	3.85008	1.58601e-17	6.98636e-15
FBgn0034887	FBgn0034887	FBgn0034887	St1	2.01172	2.01241	4.43597	2.19663e-16	9.1669e-14
FBgn0286852	FBgn0286852	FBgn0286852	naz	1.79129	1.79197	4.2878	3.80591e-16	1.50885e-13
FBgn0000121	FBgn0000121	FBgn0000121	Arr2	1.29998	1.29999	12.1187	1.32698e-15	4.95283e-13
FBgn0053158	FBgn0053158	FBgn0053158	CG33158	-1.37904	-1.37947	5.60498	1.37423e-15	4.95283e-13
FBgn0010114	FBgn0010114	FBgn0010114	hig	1.6901	1.69012	8.89379	2.22586e-15	7.6734e-13
FBgn0003975	FBgn0003975	FBgn0003975	vg	2.93104	2.93241	4.39834	2.66579e-15	8.80711e-13
FBgn0037005	FBgn0037005	FBgn0037005	CG5078	-1.63031	-1.63156	4.05831	6.44427e-15	2.04387e-12
FBgn0037098	FBgn0037098	FBgn0037098	Wnk	-1.3195	-1.31953	9.21609	6.98044e-15	2.12877e-12
FBgn0250785	FBgn0250785	FBgn0250785	vari	-1.16976	-1.1698	7.99522	3.35149e-14	9.84221e-12
FBgn0037853	FBgn0037853	FBgn0037853	CG14696	1.48157	1.48204	4.93567	4.22837e-14	1.19738e-11
FBgn0031773	FBgn0031773	FBgn0031773	Fbw5	1.75274	1.75316	5.35406	5.48163e-14	1.49875e-11
FBgn0002069	FBgn0002069	FBgn0002069	AspRS	1.50502	1.50517	6.64747	1.20978e-13	3.19744e-11
FBgn0029525	FBgn0029525	FBgn0029525	CG18273	-1.57982	-1.58127	4.10378	1.58247e-13	4.04755e-11
FBgn0031214	FBgn0031214	FBgn0031214	CG11374	1.49508	1.49528	5.96566	1.68534e-13	4.17595e-11
FBgn0034496	FBgn0034496	FBgn0034496	CG9143	-1.53995	-1.54185	3.56748	2.72867e-13	6.48629e-11
FBgn0039808	FBgn0039808	FBgn0039808	CG12071	1.29893	1.29897	8.25705	2.78136e-13	6.48629e-11
FBgn0052082	FBgn0052082	FBgn0052082	IRSp53	1.31708	1.31711	9.2568	3.23706e-13	7.33332e-11
FBgn0031589	FBgn0031589	FBgn0031589	Naprt	1.53827	1.53831	8.61897	9.52714e-13	2.09835e-10
FBgn0027564	FBgn0027564	FBgn0027564	CG3149	1.56161	1.562	4.86817	1.04014e-12	2.22899e-10
FBgn0261560	FBgn0261560	FBgn0261560	Thor	2.24045	2.24055	7.96298	1.42323e-12	2.96968e-10
FBgn0261016	FBgn0261016	FBgn0261016	clos	1.62875	1.63178	2.54225	2.25732e-12	4.5893e-10
FBgn0037852	FBgn0037852	FBgn0037852	Tpc1	1.43276	1.43305	5.56952	3.46845e-12	6.87533e-10
FBgn0052150	FBgn0052150	FBgn0052150	meru	1.62635	1.62784	3.09147	4.09755e-12	7.92426e-10
FBgn0026196	FBgn0026196	FBgn0026196	nop5	-1.26407	-1.26517	4.01525	7.59846e-12	1.43448e-09
FBgn0261611	FBgn0261611	FBgn0261611	CG42700	1.99907	1.99932	5.94552	8.81478e-12	1.6254e-09
FBgn0034300	FBgn0034300	FBgn0034300	CG5098	-1.03319	-1.03335	6.34446	1.02369e-11	1.84474e-09
FBgn0259734	FBgn0259734	FBgn0259734	Nost	1.2801	1.28012	8.79871	1.6754e-11	2.95206e-09
FBgn0014368	FBgn0014368	FBgn0014368	nol	-1.30048	-1.30147	4.17564	2.41991e-11	4.17119e-09
FBgn0002936	FBgn0002936	FBgn0002936	ninaA	0.991734	0.991823	6.69121	2.66697e-11	4.49924e-09
FBgn0037004	FBgn0037004	FBgn0037004	CG17637	-1.65069	-1.65256	3.36592	2.75614e-11	4.55281e-09
FBgn0053267	FBgn0053267	FBgn0053267	CG33267	1.63136	1.6326	3.93659	3.70546e-11	5.99603e-09
FBgn0051697	FBgn0051697	FBgn0051697	CG31697	-1.6702	-1.67279	3.10109	4.28502e-11	6.79519e-09
FBgn0025456	FBgn0025456	FBgn0025456	CREG	1.36831	1.36935	3.64424	5.17102e-11	8.03942e-09
FBgn0285912	FBgn0285912	FBgn0285912	mah	1.82193	1.82263	5.16018	5.51853e-11	8.4147e-09
FBgn0038968	FBgn0038968	FBgn0038968	CG12499	-1.33332	-1.33417	4.29569	5.83322e-11	8.72671e-09
FBgn0086451	FBgn0086451	FBgn0086451	l(2)k09022	-1.1263	-1.12685	4.82441	7.03125e-11	1.03242e-08
FBgn0262614	FBgn0262614	FBgn0262614	pyd	1.73573	1.73574	11.2366	9.59936e-11	1.38388e-08
FBgn0004644	FBgn0004644	FBgn0004644	hh	1.60362	1.60558	2.74979	1.07851e-10	1.52706e-08
FBgn0051710	FBgn0051710	FBgn0051710	CG31710	-1.4193	-1.41991	5.36217	1.27545e-10	1.77422e-08
FBgn0033557	FBgn0033557	FBgn0033557	CG12325	-1.64652	-1.64979	2.9371	1.69323e-10	2.31476e-08
FBgn0029155	FBgn0029155	FBgn0029155	Men-b	0.992776	0.992809	8.11366	2.08892e-10	2.80729e-08
FBgn0029839	FBgn0029839	FBgn0029839	CG4660	1.40967	1.4099	6.21023	2.32314e-10	3.07002e-08
FBgn0086895	FBgn0086895	FBgn0086895	pea	-1.02287	-1.02321	5.12419	3.30582e-10	4.29703e-08
FBgn0037008	FBgn0037008	FBgn0037008	mTerf3	1.47055	1.47101	4.57871	4.91651e-10	6.28758e-08
FBgn0086446	FBgn0086446	FBgn0086446	DCTN6-p27	1.78033	1.78167	3.60489	8.77354e-10	1.10421e-07
FBgn0032018	FBgn0032018	FBgn0032018	CG7806	-1.0916	-1.09199	5.29781	9.75977e-10	1.20914e-07
FBgn0033443	FBgn0033443	FBgn0033443	CG1698	2.99032	2.99112	5.53384	1.20768e-09	1.46835e-07
FBgn0031688	FBgn0031688	FBgn0031688	Cyp28d2	-2.11156	-2.11277	4.28144	1.22224e-09	1.46835e-07
FBgn0039552	FBgn0039552	FBgn0039552	CG12426	-1.55864	-1.56313	2.29645	1.24848e-09	1.47749e-07
FBgn0010278	FBgn0010278	FBgn0010278	Ssrp	-1.41314	-1.41467	4.45405	1.3759e-09	1.60434e-07
FBgn0265274	FBgn0265274	FBgn0265274	Inx3	1.09383	1.09406	5.25547	1.49096e-09	1.7133e-07
FBgn0030467	FBgn0030467	FBgn0030467	CG1764	1.46956	1.46974	6.19244	1.56015e-09	1.76721e-07
FBgn0029822	FBgn0029822	FBgn0029822	CG12236	1.15319	1.15328	6.681	1.64907e-09	1.84162e-07
FBgn0051961	FBgn0051961	FBgn0051961	TBCC	1.41925	1.41962	5.21302	2.10029e-09	2.31294e-07
FBgn0038344	FBgn0038344	FBgn0038344	obe	-1.13417	-1.13442	6.00893	2.14779e-09	2.33285e-07
FBgn0030504	FBgn0030504	FBgn0030504	CG2691	-1.03732	-1.03782	4.69303	2.79933e-09	2.99945e-07
FBgn0261461	FBgn0261461	FBgn0261461	RhoGAP18B	0.939047	0.939059	9.48442	3.23482e-09	3.41986e-07
FBgn0037263	FBgn0037263	FBgn0037263	slx1	1.33391	1.33611	2.57724	3.75291e-09	3.91537e-07
FBgn0264344	FBgn0264344	FBgn0264344	CG43800	1.61981	1.62283	2.76094	4.0553e-09	4.1759e-07
FBgn0015351	FBgn0015351	FBgn0015351	CG14906	1.44168	1.44305	3.98685	4.40973e-09	4.48266e-07
FBgn0266667	FBgn0266667	FBgn0266667	Exo70	-1.15357	-1.1546	3.70228	4.48382e-09	4.50028e-07
FBgn0037850	FBgn0037850	FBgn0037850	CG14695	1.61001	1.61102	3.9904	4.76949e-09	4.72716e-07
FBgn0032919	FBgn0032919	FBgn0032919	CG9253	-1.59253	-1.59456	3.71151	4.89382e-09	4.7905e-07
FBgn0035162	FBgn0035162	FBgn0035162	Sf3b3	-1.1405	-1.14082	5.66183	5.96451e-09	5.76739e-07
FBgn0266721	FBgn0266721	FBgn0266721	gammaSnap2	1.51875	1.52021	3.22659	6.33074e-09	6.0336e-07
FBgn0029824	FBgn0029824	FBgn0029824	CG3726	1.30605	1.30628	5.85584	6.39201e-09	6.0336e-07
FBgn0261090	FBgn0261090	FBgn0261090	Sytbeta	1.16661	1.16703	4.2262	6.51084e-09	6.07347e-07
FBgn0261530	FBgn0261530	FBgn0261530	nbs	-1.17104	-1.17217	3.86751	7.30536e-09	6.73537e-07
FBgn0038606	FBgn0038606	FBgn0038606	CG15803	0.922274	0.92232	7.36055	8.21597e-09	7.45829e-07
FBgn0262508	FBgn0262508	FBgn0262508	CG43078	-0.975716	-0.975727	9.85674	8.27758e-09	7.45829e-07
FBgn0261015	FBgn0261015	FBgn0261015	Pif1A	-1.01947	-1.01959	6.44182	8.68343e-09	7.73606e-07
FBgn0035915	FBgn0035915	FBgn0035915	S-Lap1	1.70765	1.70788	5.91668	9.10706e-09	8.02332e-07
FBgn0053094	FBgn0053094	FBgn0053094	Synd	-0.825342	-0.82537	8.17103	9.98439e-09	8.69958e-07
FBgn0039277	FBgn0039277	FBgn0039277	Nepl16	-0.936216	-0.936407	5.58698	1.0262e-08	8.8355e-07
FBgn0035914	FBgn0035914	FBgn0035914	CG6282	1.02207	1.0221	8.41414	1.03632e-08	8.8355e-07
FBgn0266282	FBgn0266282	FBgn0266282	jnj	-1.14465	-1.14525	4.85396	1.16073e-08	9.79086e-07
FBgn0267326	FBgn0267326	FBgn0267326	Ntl	-2.43068	-2.43398	3.25537	1.2111e-08	1.01082e-06
FBgn0024734	FBgn0024734	FBgn0024734	PRL-1	-1.44095	-1.4412	6.04462	1.22567e-08	1.01232e-06
FBgn0039135	FBgn0039135	FBgn0039135	CG13603	1.00395	1.00434	4.40492	1.29315e-08	1.05705e-06
FBgn0263046	FBgn0263046	FBgn0263046	CG43341	1.79342	1.79562	3.52866	1.41158e-08	1.14209e-06
FBgn0014859	FBgn0014859	FBgn0014859	Hr38	-1.96342	-1.9635	8.21952	1.49549e-08	1.19775e-06
FBgn0033995	FBgn0033995	FBgn0033995	GPHR	-1.34305	-1.34598	2.65037	1.76782e-08	1.40171e-06
FBgn0040837	FBgn0040837	FBgn0040837	CG8620	-2.13557	-2.14176	3.01545	1.79799e-08	1.41151e-06
FBgn0037140	FBgn0037140	FBgn0037140	SLC22A	1.40311	1.40372	3.89865	1.93724e-08	1.50592e-06
FBgn0033574	FBgn0033574	FBgn0033574	Spn47C	1.34207	1.34363	3.04697	1.99707e-08	1.52489e-06
FBgn0036279	FBgn0036279	FBgn0036279	Ncc69	0.98781	0.987836	8.70382	2.00011e-08	1.52489e-06
FBgn0011828	FBgn0011828	FBgn0011828	Pxn	-0.936447	-0.936664	5.37119	2.05036e-08	1.54831e-06
FBgn0036727	FBgn0036727	FBgn0036727	CG7589	1.52089	1.52157	4.06135	2.28443e-08	1.7088e-06
FBgn0024806	FBgn0024806	FBgn0024806	DIP2	-0.819451	-0.819462	9.3461	2.91753e-08	2.16197e-06
FBgn0263974	FBgn0263974	FBgn0263974	qin	1.80619	1.80644	5.85381	3.06984e-08	2.24158e-06
FBgn0031474	FBgn0031474	FBgn0031474	CG2991	-0.969421	-0.969499	7.1945	3.08151e-08	2.24158e-06
FBgn0021874	FBgn0021874	FBgn0021874	Nle	-1.41789	-1.42036	2.84354	3.27513e-08	2.36077e-06
FBgn0034641	FBgn0034641	FBgn0034641	mahj	-1.07973	-1.07995	5.97345	3.40382e-08	2.4246e-06
FBgn0263846	FBgn0263846	FBgn0263846	CG43707	-1.01707	-1.01718	6.4594	3.42483e-08	2.4246e-06
FBgn0029088	FBgn0029088	FBgn0029088	disp	1.67679	1.67688	7.60748	3.48048e-08	2.44219e-06
FBgn0261804	FBgn0261804	FBgn0261804	CG42750	-1.08457	-1.08469	6.53398	3.61183e-08	2.50946e-06
FBgn0038205	FBgn0038205	FBgn0038205	Kif19A	1.35553	1.35643	3.47859	3.63965e-08	2.50946e-06
FBgn0004397	FBgn0004397	FBgn0004397	Vinc	-0.87746	-0.877468	10.1235	4.4484e-08	3.04064e-06
FBgn0039789	FBgn0039789	FBgn0039789	CG9717	1.8857	1.88617	5.0607	4.58667e-08	3.10052e-06
FBgn0031292	FBgn0031292	FBgn0031292	CG15824	1.60526	1.60683	3.44244	4.61422e-08	3.10052e-06
FBgn0020445	FBgn0020445	FBgn0020445	E23	1.079	1.07934	4.55856	5.54568e-08	3.6951e-06
FBgn0036360	FBgn0036360	FBgn0036360	CG10713	-1.36256	-1.36458	2.81191	5.91949e-08	3.9113e-06
FBgn0039914	FBgn0039914	FBgn0039914	mav	0.998446	0.99865	5.35813	6.77123e-08	4.43711e-06
FBgn0262531	FBgn0262531	FBgn0262531	CG43085	1.38725	1.38778	4.44853	7.28538e-08	4.7259e-06
FBgn0034495	FBgn0034495	FBgn0034495	CG11788	1.32559	1.32744	2.71373	7.38383e-08	4.7259e-06
FBgn0085399	FBgn0085399	FBgn0085399	CG34370	-1.16366	-1.1641	4.71189	7.39502e-08	4.7259e-06
FBgn0038455	FBgn0038455	FBgn0038455	CG14907	1.1695	1.17008	4.6122	7.45034e-08	4.7259e-06
FBgn0002121	FBgn0002121	FBgn0002121	l(2)gl	1.28968	1.28971	9.4689	7.80311e-08	4.91039e-06
FBgn0005660	FBgn0005660	FBgn0005660	Ets21C	1.19222	1.19317	3.53996	8.63446e-08	5.39076e-06
FBgn0031986	FBgn0031986	FBgn0031986	CG8673	1.43607	1.43759	3.02164	1.031e-07	6.38655e-06
FBgn0036460	FBgn0036460	FBgn0036460	CG5114	-1.20264	-1.20474	3.00524	1.06752e-07	6.56153e-06
FBgn0266377	FBgn0266377	FBgn0266377	Pde8	1.39956	1.39958	8.78191	1.13454e-07	6.91979e-06
FBgn0040823	FBgn0040823	FBgn0040823	dpr6	-0.995611	-0.995871	5.48005	1.21121e-07	7.33105e-06
FBgn0037739	FBgn0037739	FBgn0037739	CG12948	1.04717	1.04768	4.16568	1.22374e-07	7.35079e-06
FBgn0264432	FBgn0264432	FBgn0264432	CG43850	-1.25963	-1.26141	2.84008	1.23959e-07	7.39002e-06
FBgn0010401	FBgn0010401	FBgn0010401	Os-C	2.12146	2.12365	3.32881	1.26198e-07	7.46734e-06
FBgn0035249	FBgn0035249	FBgn0035249	CG17249	1.75311	1.75415	4.30995	1.28349e-07	7.51749e-06
FBgn0050054	FBgn0050054	FBgn0050054	CG30054	-1.40309	-1.40391	4.29329	1.28942e-07	7.51749e-06
FBgn0023526	FBgn0023526	FBgn0023526	CG2865	1.01387	1.01395	7.15657	1.44968e-07	8.39016e-06
FBgn0010198	FBgn0010198	FBgn0010198	RpS15Aa	1.36486	1.36493	7.46221	1.48586e-07	8.53723e-06
FBgn0035461	FBgn0035461	FBgn0035461	ntc	1.11568	1.11692	3.02084	1.52302e-07	8.68777e-06
FBgn0036614	FBgn0036614	FBgn0036614	Golgin104	-1.07422	-1.07481	4.63931	1.54208e-07	8.72095e-06
FBgn0050456	FBgn0050456	FBgn0050456	CG30456	1.18486	1.18527	5.02797	1.55083e-07	8.72095e-06
FBgn0050046	FBgn0050046	FBgn0050046	CG30046	2.21818	2.2185	6.02065	1.58392e-07	8.84427e-06
FBgn0053191	FBgn0053191	FBgn0053191	CG33191	-1.01926	-1.01949	5.41878	1.65323e-07	9.16676e-06
FBgn0031948	FBgn0031948	FBgn0031948	CG7149	0.930447	0.930534	6.62555	1.84966e-07	1.01847e-05
FBgn0037003	FBgn0037003	FBgn0037003	CG18281	-0.959061	-0.959582	4.40539	1.96104e-07	1.07235e-05
FBgn0037448	FBgn0037448	FBgn0037448	CG15186	0.86164	0.861651	9.51539	2.15159e-07	1.16849e-05
FBgn0022213	FBgn0022213	FBgn0022213	Cse1	-1.14306	-1.14409	4.11786	2.18432e-07	1.1782e-05
FBgn0030000	FBgn0030000	FBgn0030000	CG2260	-1.33233	-1.33577	2.75006	2.26617e-07	1.21408e-05
FBgn0260942	FBgn0260942	FBgn0260942	bond	1.22297	1.22341	4.37805	2.31943e-07	1.23428e-05
FBgn0035916	FBgn0035916	FBgn0035916	GAPsec	2.34098	2.34112	7.0872	2.43888e-07	1.28919e-05
FBgn0035689	FBgn0035689	FBgn0035689	CG7376	-1.1649	-1.16605	3.972	2.50033e-07	1.31292e-05
FBgn0038256	FBgn0038256	FBgn0038256	CG7530	1.19019	1.19044	5.25792	2.64006e-07	1.37717e-05
FBgn0033224	FBgn0033224	FBgn0033224	Nop17l	1.01304	1.0131	7.45617	2.69783e-07	1.38631e-05
FBgn0266441	FBgn0266441	FBgn0266441	CG45071	0.880971	0.881085	6.08112	2.70227e-07	1.38631e-05
FBgn0030077	FBgn0030077	FBgn0030077	CG15365	1.17081	1.1716	3.56923	2.71003e-07	1.38631e-05
FBgn0033392	FBgn0033392	FBgn0033392	CG8027	1.48828	1.4892	3.88084	2.7886e-07	1.41566e-05
FBgn0029167	FBgn0029167	FBgn0029167	Hml	-0.940742	-0.940864	6.13016	2.81156e-07	1.41566e-05
FBgn0039525	FBgn0039525	FBgn0039525	CG5646	1.6473	1.64747	6.41021	2.82096e-07	1.41566e-05
FBgn0039151	FBgn0039151	FBgn0039151	CG13607	1.72112	1.72131	6.71165	2.95819e-07	1.47519e-05
FBgn0031775	FBgn0031775	FBgn0031775	CG9150	1.48237	1.48274	5.51497	3.01985e-07	1.49653e-05
FBgn0267435	FBgn0267435	FBgn0267435	chp	-0.832037	-0.83204	11.7832	3.04494e-07	1.49958e-05
FBgn0031981	FBgn0031981	FBgn0031981	Megf8	-0.81591	-0.815978	7.08889	3.11302e-07	1.52365e-05
FBgn0029930	FBgn0029930	FBgn0029930	CG12541	1.32582	1.32644	4.58152	3.23069e-07	1.57154e-05
FBgn0031655	FBgn0031655	FBgn0031655	Marcal1	-1.30032	-1.304	2.27909	3.43842e-07	1.66239e-05
FBgn0020270	FBgn0020270	FBgn0020270	mre11	-1.16884	-1.17063	3.60707	3.51752e-07	1.68726e-05
FBgn0032803	FBgn0032803	FBgn0032803	CG13082	-1.19484	-1.19508	5.63318	3.53241e-07	1.68726e-05
FBgn0052076	FBgn0052076	FBgn0052076	Alg10	1.42236	1.42443	2.70323	3.55627e-07	1.68848e-05
FBgn0035917	FBgn0035917	FBgn0035917	Zasp66	1.15326	1.15336	7.14499	3.74746e-07	1.76867e-05
FBgn0031239	FBgn0031239	FBgn0031239	CG17075	-0.842069	-0.842167	6.81844	4.01563e-07	1.86781e-05
FBgn0260935	FBgn0260935	FBgn0260935	Vps15	-0.869439	-0.869683	5.26986	4.01583e-07	1.86781e-05
FBgn0038601	FBgn0038601	FBgn0038601	CG18600	1.36308	1.36559	2.17784	4.02818e-07	1.86781e-05
FBgn0036576	FBgn0036576	FBgn0036576	CG5151	0.960815	0.96089	6.71074	4.05676e-07	1.87012e-05
FBgn0284247	FBgn0284247	FBgn0284247	ds	1.68546	1.68554	7.29471	4.13012e-07	1.89293e-05
FBgn0035359	FBgn0035359	FBgn0035359	CG1143	1.43442	1.43507	4.29218	4.42288e-07	2.01546e-05
FBgn0261648	FBgn0261648	FBgn0261648	salm	-1.13009	-1.13088	4.13672	4.57098e-07	2.07104e-05
FBgn0030223	FBgn0030223	FBgn0030223	CG2111	-0.857359	-0.857446	6.45171	4.60724e-07	2.07109e-05
FBgn0051858	FBgn0051858	FBgn0051858	t-cup	-1.4404	-1.44398	2.31955	4.62332e-07	2.07109e-05
FBgn0031636	FBgn0031636	FBgn0031636	CG12194	-0.814581	-0.814724	6.12136	5.02744e-07	2.23872e-05
FBgn0051739	FBgn0051739	FBgn0051739	AspRS-m	-0.987679	-0.98794	5.3949	5.05398e-07	2.23872e-05
FBgn0033926	FBgn0033926	FBgn0033926	Arc1	-1.44349	-1.44364	7.70671	5.10945e-07	2.25071e-05
FBgn0267351	FBgn0267351	FBgn0267351	Topors	-0.960607	-0.960912	5.38649	5.61958e-07	2.46175e-05
FBgn0028744	FBgn0028744	FBgn0028744	CG5033	-1.1255	-1.12724	3.18183	5.71255e-07	2.48873e-05
FBgn0031497	FBgn0031497	FBgn0031497	SerRS	1.31744	1.3179	4.66371	6.00289e-07	2.60093e-05
FBgn0030061	FBgn0030061	FBgn0030061	CG1785	-1.3583	-1.36088	2.98701	6.28119e-07	2.70672e-05
FBgn0028399	FBgn0028399	FBgn0028399	TMS1	-0.877373	-0.877509	6.26193	7.00629e-07	3.00286e-05
FBgn0283439	FBgn0283439	FBgn0283439	CG46281	-1.41944	-1.42364	1.96677	7.08843e-07	3.02173e-05
FBgn0037713	FBgn0037713	FBgn0037713	CG16790	1.23464	1.237	2.35887	7.79136e-07	3.30362e-05
FBgn0264330	FBgn0264330	FBgn0264330	CG43789	1.03051	1.03105	4.25989	7.8396e-07	3.30639e-05
GFP	GFP	NA	NA	-1.6611	-1.66125	7.04165	8.00706e-07	3.34363e-05
FBgn0265726	FBgn0265726	FBgn0265726	Nna1	1.13481	1.13484	8.76053	8.01224e-07	3.34363e-05
FBgn0043362	FBgn0043362	FBgn0043362	bchs	-0.896925	-0.896941	9.35093	8.08438e-07	3.35608e-05
FBgn0040775	FBgn0040775	FBgn0040775	CG12158	-2.01005	-2.01106	4.72156	8.14572e-07	3.36393e-05
FBgn0022153	FBgn0022153	FBgn0022153	l(2)k05819	1.67637	1.67639	9.75541	8.39458e-07	3.44874e-05
FBgn0039647	FBgn0039647	FBgn0039647	jus	0.969455	0.96949	8.72785	8.93319e-07	3.6511e-05
FBgn0037797	FBgn0037797	FBgn0037797	CG12420	1.42315	1.42492	3.06459	9.38638e-07	3.81665e-05
FBgn0030855	FBgn0030855	FBgn0030855	CG5800	-1.24478	-1.24712	2.96568	1.01057e-06	4.08816e-05
FBgn0032285	FBgn0032285	FBgn0032285	CG17108	-1.33069	-1.33087	6.32918	1.0281e-06	4.13798e-05
FBgn0037073	FBgn0037073	FBgn0037073	Tsr1	-1.05978	-1.06044	4.5786	1.10528e-06	4.42615e-05
FBgn0263220	FBgn0263220	FBgn0263220	Hk	0.723735	0.723739	10.5004	1.13221e-06	4.5112e-05
FBgn0085452	FBgn0085452	FBgn0085452	CG34423	-1.44424	-1.44853	2.66057	1.15436e-06	4.57648e-05
FBgn0052537	FBgn0052537	FBgn0052537	CG32537	0.883689	0.884056	4.49143	1.17807e-06	4.64723e-05
FBgn0036173	FBgn0036173	FBgn0036173	CG7394	0.980341	0.980833	4.06142	1.18528e-06	4.6525e-05
FBgn0032477	FBgn0032477	FBgn0032477	CG5287	0.902904	0.903007	5.93689	1.29525e-06	5.05912e-05
FBgn0035121	FBgn0035121	FBgn0035121	Tudor-SN	-0.781533	-0.781687	5.91076	1.38003e-06	5.36383e-05
FBgn0003048	FBgn0003048	FBgn0003048	pcx	-0.724908	-0.72494	7.87382	1.44815e-06	5.60117e-05
FBgn0000308	FBgn0000308	FBgn0000308	chic	1.08114	1.08116	8.55049	1.45702e-06	5.6081e-05
FBgn0039916	FBgn0039916	FBgn0039916	Ekar	0.829296	0.829327	7.94031	1.46594e-06	5.61519e-05
FBgn0030984	FBgn0030984	FBgn0030984	tgy	1.88709	1.89012	2.70313	1.51262e-06	5.75401e-05
FBgn0031568	FBgn0031568	FBgn0031568	CG10019	-1.0195	-1.01997	4.82706	1.51669e-06	5.75401e-05
FBgn0037551	FBgn0037551	FBgn0037551	Arl8	1.75151	1.75168	6.56359	1.53582e-06	5.79874e-05
FBgn0035588	FBgn0035588	FBgn0035588	CG10672	-0.971542	-0.972461	3.59501	1.54973e-06	5.79874e-05
FBgn0033405	FBgn0033405	FBgn0033405	CG13954	-1.07422	-1.07464	4.65221	1.55043e-06	5.79874e-05
FBgn0051313	FBgn0051313	FBgn0051313	CG31313	0.839236	0.83941	5.23301	1.62056e-06	6.03259e-05
FBgn0037137	FBgn0037137	FBgn0037137	Nopp140	-0.985664	-0.986251	4.46001	1.63146e-06	6.04479e-05
FBgn0053116	FBgn0053116	FBgn0053116	CG33116	-1.00096	-1.00108	6.65752	1.67326e-06	6.17083e-05
FBgn0027791	FBgn0027791	FBgn0027791	O-fut2	1.25251	1.25322	4.14009	1.74923e-06	6.42113e-05
FBgn0050421	FBgn0050421	FBgn0050421	Usp15-31	-0.751083	-0.751121	7.80408	1.86955e-06	6.83117e-05
FBgn0010329	FBgn0010329	FBgn0010329	Tbh	-1.04774	-1.04858	3.62952	1.92656e-06	7.00719e-05
FBgn0002783	FBgn0002783	FBgn0002783	mor	-0.862036	-0.862176	6.17202	1.99835e-06	7.23512e-05
FBgn0002645	FBgn0002645	FBgn0002645	Map205	-0.954188	-0.954237	7.83619	2.03353e-06	7.32903e-05
FBgn0035793	FBgn0035793	FBgn0035793	CG7546	-0.717248	-0.717285	7.71618	2.10067e-06	7.53676e-05
FBgn0052572	FBgn0052572	FBgn0052572	CG32572	2.14401	2.14714	3.63903	2.13425e-06	7.62274e-05
FBgn0036790	FBgn0036790	FBgn0036790	AstC-R1	-1.27162	-1.2741	2.47701	2.17057e-06	7.71771e-05
FBgn0259937	FBgn0259937	FBgn0259937	Nop60B	-1.08894	-1.08974	4.20957	2.18702e-06	7.74146e-05
FBgn0027509	FBgn0027509	FBgn0027509	TBCD	-0.928314	-0.928545	5.54389	2.23893e-06	7.87878e-05
FBgn0039182	FBgn0039182	FBgn0039182	CG5728	-0.911571	-0.912093	4.50051	2.24568e-06	7.87878e-05
FBgn0032298	FBgn0032298	FBgn0032298	CG6724	-1.42226	-1.4258	2.54929	2.27569e-06	7.94887e-05
FBgn0261085	FBgn0261085	FBgn0261085	Syt12	1.17202	1.17238	4.69648	2.35292e-06	8.18258e-05
FBgn0039003	FBgn0039003	FBgn0039003	wfs1	-1.13827	-1.13927	4.02112	2.37496e-06	8.22317e-05
FBgn0003310	FBgn0003310	FBgn0003310	S	-0.770245	-0.770275	8.23033	2.52496e-06	8.70451e-05
FBgn0264090	FBgn0264090	FBgn0264090	CG43759	0.893139	0.893256	5.80236	2.57212e-06	8.82873e-05
FBgn0026088	FBgn0026088	FBgn0026088	CG14818	1.02604	1.02651	4.12623	2.63492e-06	9.00528e-05
FBgn0265002	FBgn0265002	FBgn0265002	CG44153	-0.916195	-0.916413	5.43516	2.66221e-06	9.05952e-05
FBgn0040028	FBgn0040028	FBgn0040028	CG17450	1.12148	1.1232	2.55587	2.6935e-06	9.12683e-05
FBgn0033863	FBgn0033863	FBgn0033863	CG13337	0.962208	0.962576	5.31315	2.79417e-06	9.42765e-05
FBgn0034493	FBgn0034493	FBgn0034493	CG8908	1.21641	1.21675	4.8518	2.86163e-06	9.61434e-05
FBgn0027568	FBgn0027568	FBgn0027568	Cand1	-0.729598	-0.729675	6.58021	2.97162e-06	9.94178e-05
FBgn0034240	FBgn0034240	FBgn0034240	MESR4	-0.796713	-0.796765	7.50188	2.99889e-06	9.99084e-05
FBgn0010434	FBgn0010434	FBgn0010434	cora	-0.785598	-0.785613	9.31956	3.29708e-06	0.000109383
FBgn0034734	FBgn0034734	FBgn0034734	CG4554	-0.908955	-0.909493	4.28451	3.5831e-06	0.000118377
FBgn0035802	FBgn0035802	FBgn0035802	Pura	1.04115	1.04118	8.1645	3.60404e-06	0.000118574
FBgn0035439	FBgn0035439	FBgn0035439	CG14961	2.12425	2.12495	5.07584	3.69233e-06	0.000120977
FBgn0260456	FBgn0260456	FBgn0260456	CG4806	-1.0804	-1.0816	3.44968	3.84135e-06	0.000124962
FBgn0004587	FBgn0004587	FBgn0004587	B52	-0.808538	-0.808545	10.0807	3.84547e-06	0.000124962
FBgn0031985	FBgn0031985	FBgn0031985	mon2	-0.918697	-0.918757	7.43771	3.86843e-06	0.000125195
FBgn0031042	FBgn0031042	FBgn0031042	CG14221	1.29928	1.30047	3.40582	4.00044e-06	0.000128941
FBgn0031217	FBgn0031217	FBgn0031217	CG11377	1.06649	1.06696	4.27925	4.07745e-06	0.000130463
FBgn0051760	FBgn0051760	FBgn0051760	CG31760	-0.903979	-0.904374	4.51488	4.08058e-06	0.000130463
FBgn0260719	FBgn0260719	FBgn0260719	CR42546	1.54727	1.54807	5.13951	4.1118e-06	0.000130934
FBgn0263258	FBgn0263258	FBgn0263258	chas	0.770564	0.770593	8.10108	4.18798e-06	0.000132826
FBgn0015399	FBgn0015399	FBgn0015399	kek1	0.780613	0.780673	6.87159	4.39815e-06	0.000138936
FBgn0051108	FBgn0051108	FBgn0051108	TTLL5	-0.781493	-0.781673	5.53961	4.44947e-06	0.000139999
FBgn0031229	FBgn0031229	FBgn0031229	CG3436	-0.883571	-0.884215	4.09905	4.62668e-06	0.000144813
FBgn0003963	FBgn0003963	FBgn0003963	ush	-1.02533	-1.02559	5.42437	4.639e-06	0.000144813
FBgn0000568	FBgn0000568	FBgn0000568	Eip75B	0.827326	0.827339	9.1271	4.70568e-06	0.000146319
FBgn0038603	FBgn0038603	FBgn0038603	PKD	0.907011	0.90708	6.60076	4.84885e-06	0.000150182
FBgn0035438	FBgn0035438	FBgn0035438	PHGPx	0.924441	0.924559	6.3707	4.9256e-06	0.000151965
FBgn0000723	FBgn0000723	FBgn0000723	FER	0.974001	0.974011	9.84921	4.96983e-06	0.000152736
FBgn0031598	FBgn0031598	FBgn0031598	Vps53	-1.16562	-1.16624	4.56152	5.20465e-06	0.000159335
FBgn0038810	FBgn0038810	FBgn0038810	Srp72	-0.889143	-0.889727	4.08333	5.33489e-06	0.0001622
FBgn0029778	FBgn0029778	FBgn0029778	RhoGAP5A	0.979759	0.979998	5.18206	5.33917e-06	0.0001622
FBgn0052075	FBgn0052075	FBgn0052075	CG32075	-1.10257	-1.1044	3.18804	5.45683e-06	0.000165142
FBgn0260995	FBgn0260995	FBgn0260995	dpr21	-0.915064	-0.91557	4.17144	5.5484e-06	0.000167275
FBgn0264329	FBgn0264329	FBgn0264329	CG43788	1.13565	1.13618	4.19952	5.68498e-06	0.000170743
FBgn0053182	FBgn0053182	FBgn0053182	Kdm4B	-0.780613	-0.780726	6.12523	5.8021e-06	0.000173603
FBgn0035170	FBgn0035170	FBgn0035170	dpr20	-0.97726	-0.977945	3.87714	5.95256e-06	0.000177435
FBgn0284246	FBgn0284246	FBgn0284246	l(2)k09848	-1.30715	-1.31156	2.16804	6.30954e-06	0.000187372
FBgn0033379	FBgn0033379	FBgn0033379	Mys45A	-1.00357	-1.00486	3.4853	6.42595e-06	0.000190117
FBgn0033464	FBgn0033464	FBgn0033464	CG1441	0.838148	0.838443	4.41156	6.47837e-06	0.000190955
FBgn0030701	FBgn0030701	FBgn0030701	CG16952	-0.848463	-0.848593	6.28931	6.58999e-06	0.000193526
FBgn0037794	FBgn0037794	FBgn0037794	CG6254	0.88255	0.882945	4.33804	6.68505e-06	0.000195593
FBgn0021761	FBgn0021761	FBgn0021761	Nup154	-0.775142	-0.775412	5.0667	6.776e-06	0.000197525
FBgn0033178	FBgn0033178	FBgn0033178	CG11127	-1.06994	-1.07154	3.11853	6.80357e-06	0.000197603
FBgn0015010	FBgn0015010	FBgn0015010	Ag5r	1.34461	1.34547	3.76361	7.28147e-06	0.000210711
FBgn0037561	FBgn0037561	FBgn0037561	CG9630	-1.14278	-1.14565	2.47442	7.3649e-06	0.00021235
FBgn0030724	FBgn0030724	FBgn0030724	Nipsnap	0.963704	0.963999	4.5628	8.46432e-06	0.000243165
FBgn0031866	FBgn0031866	FBgn0031866	Nlg2	-0.720989	-0.721084	6.36469	8.64288e-06	0.000247398
FBgn0000287	FBgn0000287	FBgn0000287	salr	-0.850448	-0.850907	4.6158	9.21625e-06	0.000262028
FBgn0027608	FBgn0027608	FBgn0027608	CG2082	-0.855012	-0.855053	7.5732	9.22005e-06	0.000262028
FBgn0034939	FBgn0034939	FBgn0034939	thoc5	-0.879639	-0.880086	4.48056	9.34822e-06	0.000264721
FBgn0033225	FBgn0033225	FBgn0033225	TTLL12	-1.14251	-1.14352	3.58622	9.50934e-06	0.000268112
FBgn0030778	FBgn0030778	FBgn0030778	CG4678	-0.937117	-0.937407	4.91664	9.53557e-06	0.000268112
FBgn0041180	FBgn0041180	FBgn0041180	Tep4	-0.828027	-0.828066	8.08637	9.62227e-06	0.000269594
FBgn0031961	FBgn0031961	FBgn0031961	CG7102	1.07369	1.07543	2.30657	9.68395e-06	0.000269996
FBgn0041723	FBgn0041723	FBgn0041723	rho-5	-0.714025	-0.714081	7.06762	9.70475e-06	0.000269996
FBgn0031257	FBgn0031257	FBgn0031257	CG4133	-0.816782	-0.817114	4.92962	9.94297e-06	0.000275657
FBgn0025807	FBgn0025807	FBgn0025807	Rad9	-1.41402	-1.42039	2.24701	1.06949e-05	0.00029547
FBgn0010926	FBgn0010926	FBgn0010926	l(3)07882	-0.9156	-0.91648	3.92534	1.07821e-05	0.000296149
FBgn0051510	FBgn0051510	FBgn0051510	CG31510	-0.789898	-0.790009	6.39096	1.07942e-05	0.000296149
FBgn0033925	FBgn0033925	FBgn0033925	CG8617	-0.975123	-0.976231	3.45179	1.10617e-05	0.000302443
FBgn0003372	FBgn0003372	FBgn0003372	Sgs1	0.985801	0.986525	3.64835	1.11916e-05	0.000304942
FBgn0027066	FBgn0027066	FBgn0027066	Eb1	-0.976111	-0.976156	7.83474	1.13513e-05	0.000308234
FBgn0037637	FBgn0037637	FBgn0037637	IscU	0.961855	0.962041	5.62918	1.14303e-05	0.000309319
FBgn0004390	FBgn0004390	FBgn0004390	RasGAP1	-0.760177	-0.760219	7.53613	1.15265e-05	0.000310863
FBgn0038053	FBgn0038053	FBgn0038053	CG18549	0.878481	0.878605	5.93416	1.19233e-05	0.000320474
FBgn0032925	FBgn0032925	FBgn0032925	CG9246	-1.15684	-1.15852	3.35561	1.23258e-05	0.000330174
FBgn0037143	FBgn0037143	FBgn0037143	CR7448	1.42086	1.42295	2.66618	1.25474e-05	0.000334979
FBgn0034573	FBgn0034573	FBgn0034573	CG3295	0.887776	0.888052	4.89627	1.31125e-05	0.000348889
FBgn0032363	FBgn0032363	FBgn0032363	Dlg5	-0.70865	-0.708689	7.67406	1.33658e-05	0.000353301
FBgn0031149	FBgn0031149	FBgn0031149	Stt3A	-0.799966	-0.80033	4.53863	1.33924e-05	0.000353301
FBgn0034583	FBgn0034583	FBgn0034583	CG10527	0.839916	0.83997	7.05741	1.3412e-05	0.000353301
FBgn0030474	FBgn0030474	FBgn0030474	CG15747	0.93744	0.937667	5.31341	1.45184e-05	0.000381179
FBgn0053113	FBgn0053113	FBgn0053113	Rtnl1	-0.837243	-0.83726	9.12319	1.46968e-05	0.000384591
FBgn0037443	FBgn0037443	FBgn0037443	Dmtn	-0.79388	-0.793895	8.93684	1.49114e-05	0.000388922
FBgn0035830	FBgn0035830	FBgn0035830	CG8209	-0.937367	-0.938228	3.90416	1.55831e-05	0.000405109
FBgn0036369	FBgn0036369	FBgn0036369	CG10089	-1.1215	-1.12185	5.48714	1.56841e-05	0.000406403
FBgn0261823	FBgn0261823	FBgn0261823	Asx	-0.698522	-0.69856	7.63037	1.63678e-05	0.000422738
FBgn0037371	FBgn0037371	FBgn0037371	Sym	-0.806755	-0.807227	4.341	1.65266e-05	0.000425452
FBgn0031950	FBgn0031950	FBgn0031950	Herp	0.768347	0.768414	6.44509	1.66235e-05	0.000426562
FBgn0033515	FBgn0033515	FBgn0033515	Ir47a	-1.02682	-1.02781	3.18902	1.67101e-05	0.000427401
FBgn0050502	FBgn0050502	FBgn0050502	fa2h	1.10402	1.10692	2.05045	1.69838e-05	0.000431556
FBgn0032793	FBgn0032793	FBgn0032793	CG10189	-1.13447	-1.13652	3.01066	1.69989e-05	0.000431556
FBgn0024836	FBgn0024836	FBgn0024836	stan	-0.831585	-0.831685	6.30421	1.70358e-05	0.000431556
FBgn0038173	FBgn0038173	FBgn0038173	Adgf-C	1.42102	1.42151	4.46229	1.74817e-05	0.000437921
FBgn0038428	FBgn0038428	FBgn0038428	CG14894	0.955852	0.956215	4.79179	1.74932e-05	0.000437921
FBgn0039861	FBgn0039861	FBgn0039861	pasha	-0.777948	-0.778087	5.75881	1.74987e-05	0.000437921
FBgn0015614	FBgn0015614	FBgn0015614	CanB2	0.712746	0.712844	5.9968	1.7508e-05	0.000437921
FBgn0036487	FBgn0036487	FBgn0036487	Prp31	-0.976172	-0.977063	3.95607	1.8064e-05	0.000450408
FBgn0265184	FBgn0265184	FBgn0265184	CG44249	-1.14286	-1.14574	2.45215	1.86992e-05	0.000463632
FBgn0038180	FBgn0038180	FBgn0038180	Cht5	0.984062	0.984754	3.45852	1.87593e-05	0.000463632
FBgn0029814	FBgn0029814	FBgn0029814	CG15765	-0.779667	-0.779773	6.18152	1.87698e-05	0.000463632
FBgn0028497	FBgn0028497	FBgn0028497	CG3530	-0.809579	-0.80961	7.85445	1.94387e-05	0.000478662
FBgn0028532	FBgn0028532	FBgn0028532	CG7968	-1.13077	-1.13354	2.18536	2.02806e-05	0.000497847
FBgn0002887	FBgn0002887	FBgn0002887	mus201	-0.861898	-0.862375	4.87128	2.05773e-05	0.000503572
FBgn0040005	FBgn0040005	FBgn0040005	CG17883	0.839968	0.840177	5.3265	2.07846e-05	0.000507081
FBgn0035139	FBgn0035139	FBgn0035139	CG13891	1.10191	1.10273	3.48033	2.10573e-05	0.000512156
FBgn0030092	FBgn0030092	FBgn0030092	fh	1.15095	1.15301	2.52858	2.14506e-05	0.000520129
FBgn0039324	FBgn0039324	FBgn0039324	CG10553	1.02983	1.03072	2.96537	2.17628e-05	0.000526088
FBgn0039696	FBgn0039696	FBgn0039696	Rnb	-0.868194	-0.868456	5.24455	2.21592e-05	0.000532552
FBgn0033705	FBgn0033705	FBgn0033705	CG13168	1.23674	1.23917	2.49107	2.21645e-05	0.000532552
FBgn0030720	FBgn0030720	FBgn0030720	CG8939	-1.15204	-1.15409	3.19601	2.24452e-05	0.000537667
FBgn0000535	FBgn0000535	FBgn0000535	eag	0.848486	0.84849	10.9789	2.27469e-05	0.000543254
FBgn0030482	FBgn0030482	FBgn0030482	CG1673	-1.07068	-1.07117	5.17409	2.29416e-05	0.000546257
FBgn0027586	FBgn0027586	FBgn0027586	CG5867	0.807438	0.807536	6.06164	2.30825e-05	0.000547967
FBgn0033607	FBgn0033607	FBgn0033607	CG9062	-0.836511	-0.836674	5.72572	2.41254e-05	0.000571016
FBgn0038866	FBgn0038866	FBgn0038866	CG5810	-0.78772	-0.787818	6.42582	2.42235e-05	0.000571631
FBgn0024329	FBgn0024329	FBgn0024329	Mekk1	1.03638	1.03643	7.4636	2.47202e-05	0.000581622
FBgn0261046	FBgn0261046	FBgn0261046	Dscam3	-0.900137	-0.900215	6.96616	2.49462e-05	0.000583592
FBgn0261797	FBgn0261797	FBgn0261797	Dhc64C	-0.68133	-0.681337	9.75514	2.49511e-05	0.000583592
FBgn0036911	FBgn0036911	FBgn0036911	Fibp	-0.961559	-0.962051	4.43778	2.56259e-05	0.000597612
FBgn0033188	FBgn0033188	FBgn0033188	Drat	0.745277	0.745371	6.41375	2.59134e-05	0.000601577
FBgn0003137	FBgn0003137	FBgn0003137	Ppn	-0.876871	-0.876912	7.81567	2.59477e-05	0.000601577
FBgn0033842	FBgn0033842	FBgn0033842	cbc	-0.945831	-0.947004	3.2679	2.67918e-05	0.000619336
FBgn0053110	FBgn0053110	FBgn0053110	CG33110	0.822626	0.822777	5.43708	2.74534e-05	0.000632786
FBgn0029895	FBgn0029895	FBgn0029895	CG14441	0.748675	0.748715	7.60053	2.80202e-05	0.000643976
FBgn0038055	FBgn0038055	FBgn0038055	trus	0.88272	0.882913	5.17337	2.82066e-05	0.000646387
FBgn0002525	FBgn0002525	FBgn0002525	Lam	-0.941609	-0.942076	4.89678	2.84588e-05	0.000650288
FBgn0035988	FBgn0035988	FBgn0035988	CG3982	-0.909176	-0.909574	4.50929	2.89125e-05	0.000657711
FBgn0030195	FBgn0030195	FBgn0030195	CG2898	-1.01973	-1.02001	5.22395	2.89496e-05	0.000657711
FBgn0025644	FBgn0025644	FBgn0025644	CG14424	1.17488	1.17576	3.65411	3.06522e-05	0.000694403
FBgn0002524	FBgn0002524	FBgn0002524	lace	-0.762352	-0.762553	5.32363	3.09506e-05	0.000699166
FBgn0053189	FBgn0053189	FBgn0053189	CG33189	-0.849143	-0.849347	5.41589	3.11971e-05	0.000702732
FBgn0039326	FBgn0039326	FBgn0039326	CG10562	1.23191	1.23307	3.03088	3.1349e-05	0.000704154
FBgn0036257	FBgn0036257	FBgn0036257	RhoGAP68F	-0.802564	-0.802638	6.96477	3.1523e-05	0.000706062
FBgn0261999	FBgn0261999	FBgn0261999	Ca-Ma2d	-0.924457	-0.924478	8.61527	3.22193e-05	0.000719624
FBgn0033932	FBgn0033932	FBgn0033932	Dh44-R1	-1.05632	-1.0575	3.30509	3.26977e-05	0.000728259
FBgn0000028	FBgn0000028	FBgn0000028	acj6	-1.01482	-1.01569	3.6333	3.34822e-05	0.000743643
FBgn0003346	FBgn0003346	FBgn0003346	RanGAP	-1.03164	-1.03332	3.24821	3.41473e-05	0.000756295
FBgn0004618	FBgn0004618	FBgn0004618	gl	-0.893588	-0.893617	8.49994	3.49876e-05	0.000772573
FBgn0028397	FBgn0028397	FBgn0028397	Tob	0.67787	0.677897	7.82891	3.51601e-05	0.000772573
FBgn0052667	FBgn0052667	FBgn0052667	ssp7	1.14987	1.15055	3.87547	3.51745e-05	0.000772573
FBgn0039584	FBgn0039584	FBgn0039584	beat-VI	-0.927177	-0.927565	4.63994	3.56224e-05	0.000780248
FBgn0038723	FBgn0038723	FBgn0038723	CG6195	-0.819149	-0.819864	3.98193	3.66278e-05	0.00080006
FBgn0031816	FBgn0031816	FBgn0031816	Rchy1	0.895603	0.896163	3.77212	3.74934e-05	0.000816717
FBgn0085195	FBgn0085195	FBgn0085195	CG34166	-0.865941	-0.86641	4.11901	3.79136e-05	0.000823608
FBgn0034223	FBgn0034223	FBgn0034223	Tes	-1.16605	-1.1685	2.63791	3.89383e-05	0.000843556
FBgn0038593	FBgn0038593	FBgn0038593	Vps39	-0.877339	-0.877792	4.52596	4.01196e-05	0.000863237
FBgn0264490	FBgn0264490	FBgn0264490	Eip93F	0.670106	0.670112	10.1135	4.01578e-05	0.000863237
FBgn0285926	FBgn0285926	FBgn0285926	Imp	0.685039	0.685081	7.71422	4.01733e-05	0.000863237
FBgn0052195	FBgn0052195	FBgn0052195	CG32195	-0.983964	-0.985443	2.73896	4.03719e-05	0.000865158
FBgn0038296	FBgn0038296	FBgn0038296	CG6752	-0.854499	-0.854817	5.10283	4.13308e-05	0.00088332
FBgn0261930	FBgn0261930	FBgn0261930	vnd	1.69558	1.69604	4.96224	4.19528e-05	0.000894203
FBgn0037541	FBgn0037541	FBgn0037541	CG2747	-0.6391	-0.639123	8.22104	4.23007e-05	0.000899201
FBgn0259697	FBgn0259697	FBgn0259697	nvd	1.14239	1.14293	4.15145	4.28979e-05	0.000909459
FBgn0086443	FBgn0086443	FBgn0086443	AsnRS	1.19256	1.19276	6.02352	4.33078e-05	0.0009157
FBgn0027582	FBgn0027582	FBgn0027582	CG6230	-0.724437	-0.724611	5.52027	4.37007e-05	0.000920252
FBgn0003008	FBgn0003008	FBgn0003008	or	-1.27777	-1.28109	2.0269	4.37615e-05	0.000920252
FBgn0031858	FBgn0031858	FBgn0031858	CG17378	-0.764593	-0.764644	7.28225	4.38713e-05	0.000920252
FBgn0035922	FBgn0035922	FBgn0035922	Pex7	0.992172	0.992451	4.89334	4.41613e-05	0.000921583
FBgn0040395	FBgn0040395	FBgn0040395	Unc-76	0.742116	0.742141	7.99537	4.41672e-05	0.000921583
FBgn0035537	FBgn0035537	FBgn0035537	CG11342	-1.28584	-1.28654	3.94654	4.44551e-05	0.000925156
FBgn0023416	FBgn0023416	FBgn0023416	Ac3	-0.885188	-0.885321	5.97488	4.52225e-05	0.000938664
FBgn0031213	FBgn0031213	FBgn0031213	galectin	0.947647	0.947699	7.29732	4.70809e-05	0.000974686
FBgn0011206	FBgn0011206	FBgn0011206	bol	-0.724055	-0.724067	8.96536	4.82091e-05	0.000995443
FBgn0038746	FBgn0038746	FBgn0038746	Surf6	-1.08003	-1.08365	2.12914	5.03573e-05	0.0010371
FBgn0022787	FBgn0022787	FBgn0022787	Hel89B	-0.80538	-0.805403	8.35565	5.0501e-05	0.00103736
FBgn0000625	FBgn0000625	FBgn0000625	eyg	-1.00667	-1.00709	4.72246	5.07119e-05	0.001039
FBgn0036986	FBgn0036986	FBgn0036986	CG5282	-0.967745	-0.968937	3.02611	5.11667e-05	0.00104562
FBgn0030530	FBgn0030530	FBgn0030530	jub	0.866768	0.866944	5.44786	5.14201e-05	0.0010481
FBgn0039804	FBgn0039804	FBgn0039804	CG15544	1.06762	1.06768	6.651	5.16145e-05	0.00104936
FBgn0037906	FBgn0037906	FBgn0037906	PGRP-LB	0.960407	0.961671	2.58276	5.17946e-05	0.00105033
FBgn0041627	FBgn0041627	FBgn0041627	Ku80	-0.988074	-0.989645	3.56421	5.21717e-05	0.00105528
FBgn0039328	FBgn0039328	FBgn0039328	CHKov2	0.804015	0.804506	3.62198	5.43305e-05	0.00109615
FBgn0034068	FBgn0034068	FBgn0034068	casp	-0.72425	-0.724404	5.77625	5.51837e-05	0.00111054
FBgn0022764	FBgn0022764	FBgn0022764	Sin3A	-0.599121	-0.599131	9.45237	5.81081e-05	0.00116372
FBgn0020255	FBgn0020255	FBgn0020255	Ran	0.73206	0.732192	5.48623	5.812e-05	0.00116372
FBgn0036997	FBgn0036997	FBgn0036997	CG5955	-1.26009	-1.26229	2.86982	6.09822e-05	0.00121795
FBgn0027081	FBgn0027081	FBgn0027081	ThrRS	0.995629	0.99574	6.29315	6.13273e-05	0.00122177
FBgn0285954	FBgn0285954	FBgn0285954	caz	-0.799639	-0.799781	5.93194	6.17858e-05	0.00122782
FBgn0033753	FBgn0033753	FBgn0033753	Cyp301a1	1.24183	1.24377	2.40057	6.27785e-05	0.00124292
FBgn0004908	FBgn0004908	FBgn0004908	Arl2	-1.187	-1.19145	1.73378	6.29039e-05	0.00124292
FBgn0033688	FBgn0033688	FBgn0033688	Prp8	-0.722839	-0.722883	7.45352	6.3016e-05	0.00124292
FBgn0263855	FBgn0263855	FBgn0263855	BubR1	1.0295	1.03047	3.28105	6.36668e-05	0.00125035
FBgn0002431	FBgn0002431	FBgn0002431	hyd	-0.633855	-0.633875	8.40451	6.37081e-05	0.00125035
FBgn0261545	FBgn0261545	FBgn0261545	CG42663	-0.717307	-0.717506	5.19032	6.43509e-05	0.00125985
FBgn0032590	FBgn0032590	FBgn0032590	CG4631	-0.692303	-0.692377	6.59093	6.45998e-05	0.00126161
FBgn0030654	FBgn0030654	FBgn0030654	CG15643	1.13514	1.13695	2.65603	6.61243e-05	0.00128821
FBgn0040754	FBgn0040754	FBgn0040754	CG17059	0.905149	0.906703	2.23792	6.80921e-05	0.00132329
FBgn0040973	FBgn0040973	FBgn0040973	CG16824	-1.0125	-1.01292	4.75281	6.93383e-05	0.00134295
FBgn0035871	FBgn0035871	FBgn0035871	BI-1	0.812239	0.81249	4.94308	6.94427e-05	0.00134295
FBgn0030121	FBgn0030121	FBgn0030121	Cfp1	1.06992	1.07011	5.73888	6.96812e-05	0.00134429
FBgn0037533	FBgn0037533	FBgn0037533	CD98hc	0.925328	0.925375	7.56286	7.00361e-05	0.00134786
FBgn0035921	FBgn0035921	FBgn0035921	CG13305	2.13075	2.13076	10.1037	7.11425e-05	0.00136583
FBgn0260653	FBgn0260653	FBgn0260653	serp	0.946775	0.947393	3.66528	7.26726e-05	0.00139184
FBgn0041789	FBgn0041789	FBgn0041789	Pax	-0.705	-0.705067	7.10587	7.3154e-05	0.00139768
FBgn0266101	FBgn0266101	FBgn0266101	CG44838	0.712101	0.71211	9.45656	7.38656e-05	0.00140788
FBgn0030406	FBgn0030406	FBgn0030406	CG1463	-1.09375	-1.09634	2.44027	7.46289e-05	0.00141902
FBgn0027598	FBgn0027598	FBgn0027598	cindr	0.709112	0.709123	9.12124	7.50397e-05	0.00142342
FBgn0039509	FBgn0039509	FBgn0039509	bigmax	0.930908	0.931549	4.07488	7.57464e-05	0.00143203
FBgn0053179	FBgn0053179	FBgn0053179	beat-IIIb	-0.921242	-0.921673	4.38901	7.58547e-05	0.00143203
FBgn0035944	FBgn0035944	FBgn0035944	CG5021	-0.872773	-0.873574	3.62666	7.71931e-05	0.00145383
FBgn0002891	FBgn0002891	FBgn0002891	DNApol-zeta	-0.80433	-0.8045	6.05795	7.75949e-05	0.00145794
FBgn0034251	FBgn0034251	FBgn0034251	ND-51L1	-0.903115	-0.90363	4.14907	7.9526e-05	0.00148783
FBgn0037534	FBgn0037534	FBgn0037534	ELOVL	0.783813	0.783951	5.38562	7.9561e-05	0.00148783
FBgn0029800	FBgn0029800	FBgn0029800	lin-52	1.01711	1.01774	3.80228	8.01315e-05	0.00149497
FBgn0263512	FBgn0263512	FBgn0263512	Vsx2	-0.990941	-0.992774	2.38926	8.20763e-05	0.00152766
FBgn0013765	FBgn0013765	FBgn0013765	cnn	-0.753666	-0.753764	6.44622	8.23764e-05	0.00152965
FBgn0036967	FBgn0036967	FBgn0036967	SCCRO4	-0.700874	-0.701096	5.12647	8.29695e-05	0.00153707
FBgn0266100	FBgn0266100	FBgn0266100	CG44837	-0.82698	-0.827307	4.69623	8.37723e-05	0.00154832
FBgn0038223	FBgn0038223	FBgn0038223	Afti	-0.67469	-0.674753	6.8823	8.66687e-05	0.00159436
FBgn0033903	FBgn0033903	FBgn0033903	CG8323	-0.930869	-0.931625	3.7453	8.66763e-05	0.00159436
FBgn0038693	FBgn0038693	FBgn0038693	unc79	-0.825252	-0.825281	8.08687	8.68663e-05	0.00159436
FBgn0031053	FBgn0031053	FBgn0031053	CG14223	0.904324	0.90509	3.88988	8.78522e-05	0.00160873
FBgn0264305	FBgn0264305	FBgn0264305	CG43783	-0.83933	-0.839413	6.7578	8.83308e-05	0.00161377
FBgn0032934	FBgn0032934	FBgn0032934	CG8679	-0.756503	-0.756629	6.30407	8.87138e-05	0.00161511
FBgn0033137	FBgn0033137	FBgn0033137	Tsp42Ep	0.976185	0.97691	3.31337	8.88119e-05	0.00161511
FBgn0004373	FBgn0004373	FBgn0004373	fwd	-0.620899	-0.620914	8.72946	9.11089e-05	0.0016531
FBgn0034225	FBgn0034225	FBgn0034225	veil	-1.04737	-1.04939	2.65816	9.13588e-05	0.00165384
FBgn0039685	FBgn0039685	FBgn0039685	Obp99b	-1.20942	-1.21013	4.45702	9.24503e-05	0.00166854
FBgn0004657	FBgn0004657	FBgn0004657	mys	-0.825056	-0.825076	8.67253	9.25916e-05	0.00166854
FBgn0030883	FBgn0030883	FBgn0030883	CG7772	1.0142	1.01501	3.33807	9.54197e-05	0.00171561
FBgn0030431	FBgn0030431	FBgn0030431	CG4407	0.933387	0.933747	4.68106	9.74169e-05	0.00174605
FBgn0016685	FBgn0016685	FBgn0016685	Nlp	-0.866461	-0.867633	3.42823	9.75534e-05	0.00174605
FBgn0052806	FBgn0052806	FBgn0052806	CG32806	-1.17683	-1.1778	3.47617	9.8461e-05	0.00175833
FBgn0038474	FBgn0038474	FBgn0038474	mRpS11	1.09613	1.09694	3.83973	9.8873e-05	0.00176172
FBgn0025814	FBgn0025814	FBgn0025814	Mgstl	0.912621	0.912744	6.01361	0.000100947	0.00179464
FBgn0039282	FBgn0039282	FBgn0039282	Bili	-0.726651	-0.726703	7.05613	0.000102672	0.00181887
FBgn0038890	FBgn0038890	FBgn0038890	CG7956	-0.660127	-0.660201	6.78049	0.000102922	0.00181887
FBgn0038274	FBgn0038274	FBgn0038274	Nup93-2	-0.875185	-0.876282	3.42846	0.000102998	0.00181887
FBgn0263257	FBgn0263257	FBgn0263257	Cngl	-0.802101	-0.802126	8.33314	0.000105777	0.00186379
FBgn0052057	FBgn0052057	FBgn0052057	dpr10	-0.838344	-0.838859	4.08934	0.000106676	0.00187546
FBgn0035630	FBgn0035630	FBgn0035630	CG10576	-0.702606	-0.702794	5.47205	0.000107274	0.00188181
FBgn0260933	FBgn0260933	FBgn0260933	rempA	0.837974	0.838291	4.57775	0.000108408	0.00189346
FBgn0020388	FBgn0020388	FBgn0020388	Gcn5	-0.742409	-0.742514	6.49937	0.000108416	0.00189346
FBgn0037754	FBgn0037754	FBgn0037754	CG8500	0.670096	0.670133	7.41743	0.000110854	0.00193179
FBgn0038952	FBgn0038952	FBgn0038952	CG7069	1.31228	1.31287	4.48613	0.000112011	0.00194767
FBgn0030925	FBgn0030925	FBgn0030925	Hayan	0.775842	0.776234	4.14683	0.000112599	0.00195361
FBgn0031284	FBgn0031284	FBgn0031284	PGAP2	1.10263	1.1043	2.69853	0.000113169	0.00195787
FBgn0260962	FBgn0260962	FBgn0260962	pic	-0.801246	-0.801581	4.87012	0.000113395	0.00195787
FBgn0260795	FBgn0260795	FBgn0260795	NaPi-III	-0.646243	-0.646271	8.24096	0.000113585	0.00195787
FBgn0037391	FBgn0037391	FBgn0037391	CG2017	1.85418	1.85423	8.44706	0.000114498	0.00196931
FBgn0035237	FBgn0035237	FBgn0035237	CG13917	-0.60936	-0.609368	9.41597	0.000117864	0.00201994
FBgn0030886	FBgn0030886	FBgn0030886	CG12672	0.809361	0.809432	6.66736	0.000117951	0.00201994
FBgn0032816	FBgn0032816	FBgn0032816	Nf-YB	0.759401	0.759878	3.94515	0.000118236	0.00202046
FBgn0052396	FBgn0052396	FBgn0052396	CG32396	-0.926005	-0.926958	3.55918	0.000123332	0.002103
FBgn0050394	FBgn0050394	FBgn0050394	CG30394	-0.777493	-0.777759	5.09978	0.00012375	0.00210561
FBgn0030719	FBgn0030719	FBgn0030719	eIF5	-1.27099	-1.27576	1.71869	0.00012441	0.0021123
FBgn0020381	FBgn0020381	FBgn0020381	Dredd	0.81075	0.811078	4.70235	0.000124707	0.00211282
FBgn0032204	FBgn0032204	FBgn0032204	CG4953	-0.852143	-0.853228	3.03739	0.00012551	0.0021219
FBgn0033650	FBgn0033650	FBgn0033650	CG13193	-0.81662	-0.817322	3.92213	0.000125833	0.00212282
FBgn0267390	FBgn0267390	FBgn0267390	dop	-0.596307	-0.596322	8.73168	0.000126349	0.002127
FBgn0263219	FBgn0263219	FBgn0263219	Dscam4	-0.805192	-0.805263	6.96274	0.000128862	0.00216472
FBgn0038871	FBgn0038871	FBgn0038871	CG3337	-0.917541	-0.918827	3.06026	0.000129491	0.00217068
FBgn0261041	FBgn0261041	FBgn0261041	stj	-0.629587	-0.62959	10.8674	0.000132886	0.0022229
FBgn0036686	FBgn0036686	FBgn0036686	CG7728	-0.882821	-0.883359	4.49936	0.000134315	0.00224007
FBgn0051774	FBgn0051774	FBgn0051774	fred	-0.733756	-0.733926	5.50056	0.000134477	0.00224007
FBgn0034007	FBgn0034007	FBgn0034007	ND-51L2	0.959179	0.961129	2.20154	0.000135419	0.00225102
FBgn0005777	FBgn0005777	FBgn0005777	PpD3	-0.680942	-0.68101	6.41844	0.000135732	0.0022515
FBgn0035911	FBgn0035911	FBgn0035911	CG6638	0.840942	0.842114	3.00281	0.000137011	0.00226798
FBgn0264006	FBgn0264006	FBgn0264006	dysc	-0.648518	-0.648521	11.2501	0.000138643	0.0022902
FBgn0037022	FBgn0037022	FBgn0037022	CG11396	-0.86887	-0.869473	4.16578	0.000139337	0.00229689
FBgn0265003	FBgn0265003	FBgn0265003	koi	-0.882611	-0.882708	6.85568	0.00014071	0.00231082
FBgn0050005	FBgn0050005	FBgn0050005	GstT2	0.78202	0.782301	4.6654	0.000140765	0.00231082
FBgn0038930	FBgn0038930	FBgn0038930	CG5778	-1.35604	-1.35699	3.88476	0.000142314	0.00233074
FBgn0050431	FBgn0050431	FBgn0050431	CG30431	0.860084	0.860591	4.09932	0.000142566	0.00233074
FBgn0028475	FBgn0028475	FBgn0028475	Hrd3	-0.79149	-0.791685	5.3992	0.000144467	0.00235695
FBgn0039742	FBgn0039742	FBgn0039742	CG15528	0.999584	1.00099	2.72357	0.000144893	0.00235905
FBgn0004118	FBgn0004118	FBgn0004118	nAChRbeta2	-0.948372	-0.949015	3.92672	0.000145204	0.00235927
FBgn0030432	FBgn0030432	FBgn0030432	CG4404	0.744752	0.744932	5.34636	0.000146234	0.00237114
FBgn0003396	FBgn0003396	FBgn0003396	shn	-0.676186	-0.676196	9.43495	0.000148018	0.00239518
FBgn0040237	FBgn0040237	FBgn0040237	bor	1.2852	1.2854	6.02023	0.000149896	0.00242062
FBgn0035704	FBgn0035704	FBgn0035704	Vps8	-0.797452	-0.79786	4.53092	0.000150457	0.00242474
FBgn0020269	FBgn0020269	FBgn0020269	mspo	-0.749887	-0.750088	5.5166	0.000151317	0.00243365
FBgn0035432	FBgn0035432	FBgn0035432	ZnT63C	-0.692788	-0.69291	6.01557	0.000152718	0.00245122
FBgn0037638	FBgn0037638	FBgn0037638	CG8379	-0.779629	-0.779979	4.83626	0.000153577	0.00246003
FBgn0263456	FBgn0263456	FBgn0263456	nwk	-0.608143	-0.608162	8.26839	0.000153938	0.00246084
FBgn0032988	FBgn0032988	FBgn0032988	Tif-IA	-0.734623	-0.734974	4.4005	0.000157675	0.00251551
FBgn0260011	FBgn0260011	FBgn0260011	NimC4	-1.0474	-1.04992	2.20522	0.000160644	0.00255772
FBgn0265137	FBgn0265137	FBgn0265137	Spn42Da	-0.861223	-0.861433	5.60642	0.000161083	0.00255826
FBgn0039311	FBgn0039311	FBgn0039311	CG10513	0.830291	0.830739	3.78643	0.000161323	0.00255826
FBgn0040827	FBgn0040827	FBgn0040827	CG13315	-1.04441	-1.04509	4.11204	0.000163839	0.00259298
FBgn0037344	FBgn0037344	FBgn0037344	CG2926	-0.666206	-0.666229	8.40778	0.000166937	0.00263674
FBgn0052944	FBgn0052944	FBgn0052944	CG32944	-0.831272	-0.831893	3.81246	0.000168597	0.00265767
FBgn0031068	FBgn0031068	FBgn0031068	Alr	0.898292	0.898776	4.39586	0.000169374	0.00266462
FBgn0034982	FBgn0034982	FBgn0034982	Naa35	-0.78832	-0.788924	3.83106	0.00017678	0.00277562
FBgn0027330	FBgn0027330	FBgn0027330	l(1)G0020	-1.03573	-1.03878	2.505	0.000177482	0.00278114
FBgn0039536	FBgn0039536	FBgn0039536	unc80	-0.766528	-0.766546	8.60324	0.00018219	0.00284928
FBgn0086604	FBgn0086604	FBgn0086604	side-VIII	-0.711342	-0.71144	6.165	0.000183248	0.00286019
FBgn0028690	FBgn0028690	FBgn0028690	Rpn5	-0.685366	-0.685603	5.08493	0.00018376	0.00286255
FBgn0034793	FBgn0034793	FBgn0034793	asrij	1.14963	1.15047	4.10288	0.000185428	0.00288286
FBgn0261836	FBgn0261836	FBgn0261836	Msp300	-0.698717	-0.698718	13.3352	0.000187343	0.00290693
FBgn0039165	FBgn0039165	FBgn0039165	CG6204	-0.801537	-0.802153	4.09857	0.000189479	0.00293433
FBgn0004606	FBgn0004606	FBgn0004606	zfh1	-0.70494	-0.705105	5.59031	0.000191193	0.00295511
FBgn0052829	FBgn0052829	FBgn0052829	CG32829	-1.03486	-1.03662	3.30402	0.000191687	0.00295698
FBgn0039588	FBgn0039588	FBgn0039588	mIF2	-0.91557	-0.916576	3.74036	0.000192416	0.00296246
FBgn0260858	FBgn0260858	FBgn0260858	Ykt6	0.729127	0.72962	3.77371	0.000194008	0.00298117
FBgn0028703	FBgn0028703	FBgn0028703	Nhe3	-0.651743	-0.651756	9.03237	0.000194995	0.00299056
FBgn0262871	FBgn0262871	FBgn0262871	lute	-0.71353	-0.713638	5.99093	0.000195887	0.00299843
FBgn0030081	FBgn0030081	FBgn0030081	CG7246	1.02082	1.02231	2.49222	0.000196377	0.00300014
FBgn0029929	FBgn0029929	FBgn0029929	CG4593	0.975297	0.977213	2.56666	0.000196822	0.00300116
FBgn0033055	FBgn0033055	FBgn0033055	Tbce	-0.717857	-0.718003	5.67327	0.000197604	0.0030073
FBgn0036494	FBgn0036494	FBgn0036494	Toll-6	-0.693765	-0.693939	5.15105	0.00019902	0.00302305
FBgn0027836	FBgn0027836	FBgn0027836	Dgp-1	1.18529	1.18539	6.86512	0.000202519	0.00307031
FBgn0085407	FBgn0085407	FBgn0085407	Pvf3	-0.723026	-0.723197	5.27641	0.000203627	0.00307679
FBgn0264707	FBgn0264707	FBgn0264707	RhoGEF3	-0.60118	-0.601201	8.24985	0.000203722	0.00307679
FBgn0038816	FBgn0038816	FBgn0038816	Lrrk	-0.646042	-0.646078	7.45553	0.000206072	0.00310636
FBgn0036714	FBgn0036714	FBgn0036714	CG7692	-0.694984	-0.695326	4.69261	0.000206954	0.00311374
FBgn0004047	FBgn0004047	FBgn0004047	Yp3	-1.9178	-1.91875	4.29469	0.000207613	0.00311774
FBgn0025624	FBgn0025624	FBgn0025624	CG4025	0.817646	0.818153	3.77767	0.000209542	0.00314075
FBgn0013949	FBgn0013949	FBgn0013949	Elal	-0.895745	-0.897149	2.80448	0.000210872	0.00314903
FBgn0029529	FBgn0029529	FBgn0029529	CG13365	0.926904	0.928766	2.07455	0.000210888	0.00314903
FBgn0284251	FBgn0284251	FBgn0284251	l(2)05287	-0.765906	-0.766298	4.54638	0.000213327	0.00317662
FBgn0005614	FBgn0005614	FBgn0005614	trpl	-0.702161	-0.702161	13.8212	0.000213537	0.00317662
FBgn0041004	FBgn0041004	FBgn0041004	CG17715	-0.86139	-0.862781	2.64724	0.000213979	0.00317723
FBgn0266756	FBgn0266756	FBgn0266756	btsz	-0.72477	-0.724776	10.3897	0.000215352	0.00318562
FBgn0030816	FBgn0030816	FBgn0030816	CG16700	0.839238	0.839667	3.79756	0.000215724	0.00318562
FBgn0023512	FBgn0023512	FBgn0023512	eIF2Bepsilon	0.905508	0.90572	5.20868	0.000215749	0.00318562
FBgn0052206	FBgn0052206	FBgn0052206	CG32206	-0.742749	-0.742864	5.87832	0.00021646	0.00318944
FBgn0029720	FBgn0029720	FBgn0029720	CG3009	0.762253	0.762338	6.14893	0.000216812	0.00318944
FBgn0002937	FBgn0002937	FBgn0002937	ninaB	0.955221	0.95526	7.71137	0.000218529	0.00320828
FBgn0038705	FBgn0038705	FBgn0038705	CG11626	0.946719	0.948584	2.11099	0.000218903	0.00320828
FBgn0260794	FBgn0260794	FBgn0260794	ctrip	-0.573826	-0.573833	9.76248	0.000221173	0.00323558
FBgn0033474	FBgn0033474	FBgn0033474	CG1407	0.688255	0.688362	5.84923	0.000221744	0.00323795
FBgn0036292	FBgn0036292	FBgn0036292	CG10646	-1.01603	-1.01845	2.35645	0.000223019	0.00325059
FBgn0045866	FBgn0045866	FBgn0045866	bai	-0.77257	-0.773231	3.44889	0.00022428	0.00326297
FBgn0034853	FBgn0034853	FBgn0034853	Ice1	-0.816763	-0.817447	4.1883	0.000225234	0.00327084
FBgn0027453	FBgn0027453	FBgn0027453	Dnz1	0.685553	0.685623	6.42297	0.000228899	0.00331799
FBgn0031821	FBgn0031821	FBgn0031821	KFase	-0.897507	-0.89887	2.91448	0.000230104	0.00332936
FBgn0051163	FBgn0051163	FBgn0051163	SKIP	-0.705997	-0.706077	6.54105	0.000230736	0.00333243
FBgn0032109	FBgn0032109	FBgn0032109	CG17005	-1.76386	-1.76388	8.98909	0.000231459	0.0033368
FBgn0036038	FBgn0036038	FBgn0036038	defl	-1.00651	-1.00838	2.7265	0.000233095	0.00335428
FBgn0264848	FBgn0264848	FBgn0264848	vih	-0.871878	-0.872823	3.4345	0.000234253	0.00336484
FBgn0259145	FBgn0259145	FBgn0259145	CG42260	-0.701409	-0.701483	6.58076	0.000237472	0.00340449
FBgn0086912	FBgn0086912	FBgn0086912	mbm	-0.955849	-0.958059	2.69738	0.000238077	0.00340449
FBgn0010473	FBgn0010473	FBgn0010473	tutl	-0.735592	-0.735613	8.39533	0.000238354	0.00340449
FBgn0002413	FBgn0002413	FBgn0002413	dco	-0.686152	-0.686177	8.33143	0.000238731	0.00340449
FBgn0034817	FBgn0034817	FBgn0034817	Art7	-0.775324	-0.776077	3.57622	0.000242006	0.003445
FBgn0025519	FBgn0025519	FBgn0025519	fidipidine	-0.891029	-0.891988	3.57646	0.000242887	0.00345135
FBgn0259213	FBgn0259213	FBgn0259213	side-II	-0.808023	-0.808144	6.0538	0.000247115	0.00350515
FBgn0261380	FBgn0261380	FBgn0261380	mRpL37	-0.981947	-0.984821	1.98094	0.000249038	0.00352211
FBgn0265935	FBgn0265935	FBgn0265935	coro	-0.757706	-0.757783	6.64361	0.000249263	0.00352211
FBgn0030510	FBgn0030510	FBgn0030510	CG12177	0.891329	0.892376	2.831	0.000249644	0.00352211
FBgn0083228	FBgn0083228	FBgn0083228	Frq2	-0.699761	-0.69997	4.94827	0.000251398	0.00354056
FBgn0038072	FBgn0038072	FBgn0038072	CG6225	-0.833237	-0.834054	3.17236	0.000254419	0.00357676
FBgn0259741	FBgn0259741	FBgn0259741	CG42395	-1.03949	-1.04032	3.71213	0.000257106	0.00360813
FBgn0016919	FBgn0016919	FBgn0016919	nompB	1.22719	1.22729	7.58532	0.000259111	0.00362985
FBgn0000541	FBgn0000541	FBgn0000541	E(bx)	-0.577833	-0.577843	9.24442	0.000263127	0.00367584
FBgn0030763	FBgn0030763	FBgn0030763	CG9782	0.844069	0.844929	2.84745	0.000264198	0.00367584
FBgn0028425	FBgn0028425	FBgn0028425	JhI-21	1.56047	1.56061	6.7315	0.000264213	0.00367584
FBgn0036880	FBgn0036880	FBgn0036880	Cpr76Bc	0.784719	0.78513	3.80835	0.000264249	0.00367584
FBgn0267365	FBgn0267365	FBgn0267365	l(2)SH0834	-1.06669	-1.06913	2.78693	0.000268527	0.00372881
FBgn0031414	FBgn0031414	FBgn0031414	eys	0.841153	0.841155	11.6194	0.000269152	0.00373095
FBgn0003449	FBgn0003449	FBgn0003449	snf	0.810231	0.811221	2.91757	0.000272593	0.00377206
FBgn0000629	FBgn0000629	FBgn0000629	E(z)	-0.687389	-0.687699	4.71912	0.000274054	0.00378567
FBgn0031452	FBgn0031452	FBgn0031452	Cwc25	1.18473	1.18508	5.19915	0.000275129	0.00379391
FBgn0029860	FBgn0029860	FBgn0029860	CG15891	0.848042	0.848595	4.16737	0.000277764	0.00382359
FBgn0033185	FBgn0033185	FBgn0033185	CG1603	-0.841076	-0.841659	3.99843	0.000290807	0.0039962
FBgn0037944	FBgn0037944	FBgn0037944	CG6923	0.689984	0.690007	7.99368	0.000291816	0.00400312
FBgn0039617	FBgn0039617	FBgn0039617	DIP-gamma	-0.715532	-0.715968	4.045	0.000294157	0.00402827
FBgn0038365	FBgn0038365	FBgn0038365	CG9593	0.973264	0.973874	4.00387	0.000296077	0.00404757
FBgn0040849	FBgn0040849	FBgn0040849	Ir41a	0.946821	0.947651	3.65937	0.000297684	0.00406254
FBgn0028542	FBgn0028542	FBgn0028542	NimB4	-1.00934	-1.01281	1.72406	0.000305582	0.0041575
FBgn0022382	FBgn0022382	FBgn0022382	Pka-R2	-0.731122	-0.731141	8.59258	0.000305895	0.0041575
FBgn0038597	FBgn0038597	FBgn0038597	CG8064	-0.833479	-0.834848	3.0617	0.000306215	0.0041575
FBgn0035754	FBgn0035754	FBgn0035754	MED4	-0.95837	-0.960488	2.46836	0.00030894	0.00418733
FBgn0035952	FBgn0035952	FBgn0035952	CG5280	1.19405	1.19582	2.83895	0.000312512	0.00422758
FBgn0030610	FBgn0030610	FBgn0030610	CG9065	0.68402	0.684326	4.34498	0.000312976	0.00422758
FBgn0262733	FBgn0262733	FBgn0262733	Src64B	-0.72328	-0.723448	5.93775	0.000314366	0.00423913
FBgn0035968	FBgn0035968	FBgn0035968	Slc45-1	-0.995923	-0.99718	3.08532	0.000318833	0.00429207
FBgn0028552	FBgn0028552	FBgn0028552	gammaSnap1	-0.771719	-0.772065	4.44578	0.000319399	0.00429239
FBgn0000547	FBgn0000547	FBgn0000547	ed	0.62223	0.622256	7.75147	0.000323658	0.00434
FBgn0037116	FBgn0037116	FBgn0037116	Als2	-0.628089	-0.628151	6.782	0.000324036	0.00434
FBgn0002719	FBgn0002719	FBgn0002719	Men	-0.677091	-0.677122	8.07526	0.000325274	0.00434923
FBgn0039907	FBgn0039907	FBgn0039907	lgs	-0.658144	-0.658207	6.82618	0.000326357	0.00435638
FBgn0011286	FBgn0011286	FBgn0011286	RyR	-0.67996	-0.679978	8.64367	0.000327701	0.00436624
FBgn0039064	FBgn0039064	FBgn0039064	CG4467	-0.779384	-0.779424	7.60478	0.000328197	0.00436624
FBgn0050496	FBgn0050496	FBgn0050496	CG30496	-0.827436	-0.828162	4.01163	0.000328967	0.00436914
FBgn0026402	FBgn0026402	FBgn0026402	NiPp1	-0.850407	-0.851553	3.17012	0.000330135	0.00437365
FBgn0033391	FBgn0033391	FBgn0033391	CG8026	1.04348	1.04449	3.45435	0.000330736	0.00437365
FBgn0032495	FBgn0032495	FBgn0032495	CG16820	0.96741	0.968134	3.31741	0.000330961	0.00437365
FBgn0052110	FBgn0052110	FBgn0052110	CG32110	-0.951454	-0.953303	2.47079	0.000332167	0.00438229
FBgn0034271	FBgn0034271	FBgn0034271	Vps50	-0.639296	-0.639451	5.39213	0.000333363	0.00439076
FBgn0266521	FBgn0266521	FBgn0266521	stai	-0.718197	-0.71824	7.32057	0.000339246	0.00446083
FBgn0031097	FBgn0031097	FBgn0031097	obst-A	0.847574	0.848548	2.91873	0.000346014	0.0045423
FBgn0001986	FBgn0001986	FBgn0001986	Mtr4	-0.865718	-0.866341	3.94501	0.000350509	0.00459369
FBgn0031145	FBgn0031145	FBgn0031145	Ntf-2	0.652235	0.652292	6.63799	0.000352399	0.00461085
FBgn0259821	FBgn0259821	FBgn0259821	CG42402	-0.758962	-0.759122	5.47303	0.000355588	0.0046449
FBgn0032910	FBgn0032910	FBgn0032910	CG9265	0.679355	0.679508	5.46767	0.00036159	0.00471554
FBgn0019985	FBgn0019985	FBgn0019985	mGluR	-0.853008	-0.853314	4.75132	0.000363859	0.00473734
FBgn0053052	FBgn0053052	FBgn0053052	Gorab	0.772947	0.773355	3.7941	0.000366156	0.00475943
FBgn0039734	FBgn0039734	FBgn0039734	Tace	-0.699321	-0.69948	5.54099	0.000368777	0.00478565
FBgn0046687	FBgn0046687	FBgn0046687	Tre1	0.905356	0.906029	3.51109	0.000374817	0.00485608
FBgn0265434	FBgn0265434	FBgn0265434	zip	-0.550242	-0.550254	8.95442	0.000376698	0.0048725
FBgn0000448	FBgn0000448	FBgn0000448	Hr3	0.800685	0.800834	5.55502	0.000382707	0.00494215
FBgn0028888	FBgn0028888	FBgn0028888	CG4168	0.711031	0.711054	8.34296	0.000384233	0.00495379
FBgn0033368	FBgn0033368	FBgn0033368	CG13743	-0.771305	-0.771447	5.72232	0.00039259	0.0050469
FBgn0015288	FBgn0015288	FBgn0015288	RpL22	0.766949	0.766988	7.47275	0.000392728	0.0050469
FBgn0034808	FBgn0034808	FBgn0034808	CG9896	-0.817131	-0.817664	3.98553	0.000394446	0.00506079
FBgn0039612	FBgn0039612	FBgn0039612	Nepl19	-0.843913	-0.844144	5.28401	0.000395477	0.00506582
FBgn0264562	FBgn0264562	FBgn0264562	Hr4	-1.05674	-1.05743	4.64312	0.000396974	0.00507678
FBgn0039325	FBgn0039325	FBgn0039325	CG10560	1.02456	1.02497	4.0915	0.000402794	0.00512742
FBgn0030717	FBgn0030717	FBgn0030717	Slc25A46a	-0.816743	-0.817849	3.08929	0.000403178	0.00512742
FBgn0037064	FBgn0037064	FBgn0037064	CG9389	1.67576	1.67605	6.28241	0.00040395	0.00512742
FBgn0036931	FBgn0036931	FBgn0036931	CG14183	0.931107	0.931572	4.07836	0.000404132	0.00512742
FBgn0259735	FBgn0259735	FBgn0259735	mtgo	-0.602106	-0.602115	9.47675	0.000404167	0.00512742
FBgn0039321	FBgn0039321	FBgn0039321	CG10550	0.852075	0.852515	3.73063	0.000406408	0.00514762
FBgn0029608	FBgn0029608	FBgn0029608	CG3091	0.696973	0.697305	3.97396	0.000407597	0.00515046
FBgn0050361	FBgn0050361	FBgn0050361	mtt	-0.780053	-0.78027	5.06605	0.000407932	0.00515046
FBgn0030685	FBgn0030685	FBgn0030685	Graf	-0.632569	-0.632618	7.09677	0.000409536	0.0051625
FBgn0031057	FBgn0031057	FBgn0031057	Ubqn	0.636807	0.636844	7.29586	0.000420597	0.00529351
FBgn0263968	FBgn0263968	FBgn0263968	nonC	-0.568695	-0.568737	7.17536	0.000425455	0.00534617
FBgn0050495	FBgn0050495	FBgn0050495	CG30495	-0.960063	-0.961856	2.39745	0.000432838	0.00543033
FBgn0029660	FBgn0029660	FBgn0029660	CG10801	-0.885342	-0.886118	3.33284	0.000434978	0.00544169
FBgn0286198	FBgn0286198	FBgn0286198	LKRSDH	0.661341	0.661384	6.81251	0.000435115	0.00544169
FBgn0286051	FBgn0286051	FBgn0286051	Rexo5	-0.880212	-0.881164	3.53418	0.000438554	0.00547041
FBgn0262731	FBgn0262731	FBgn0262731	CG33941	1.08148	1.0836	2.69504	0.000438792	0.00547041
FBgn0039249	FBgn0039249	FBgn0039249	CG11168	-0.736116	-0.736386	5.17387	0.00044542	0.00554432
FBgn0030687	FBgn0030687	FBgn0030687	RpIIIC160	-0.776441	-0.776941	4.20554	0.000449266	0.00558344
FBgn0040606	FBgn0040606	FBgn0040606	CG6503	-1.06074	-1.06149	3.24352	0.000453908	0.0056323
FBgn0019938	FBgn0019938	FBgn0019938	RpI1	-0.676496	-0.676892	4.52023	0.000457072	0.00566269
FBgn0002044	FBgn0002044	FBgn0002044	swm	-0.570243	-0.570281	7.29038	0.000458237	0.00566827
FBgn0263755	FBgn0263755	FBgn0263755	Su(var)3-9	-0.859088	-0.860006	4.00817	0.000463447	0.00572378
FBgn0261561	FBgn0261561	FBgn0261561	CG42675	0.882071	0.882397	4.3448	0.000464681	0.0057301
FBgn0039743	FBgn0039743	FBgn0039743	CG7946	0.725809	0.726142	4.22397	0.000471221	0.00579524
FBgn0039030	FBgn0039030	FBgn0039030	CG6660	-0.967064	-0.969246	2.6498	0.000471425	0.00579524
FBgn0040074	FBgn0040074	FBgn0040074	retinin	0.820828	0.820896	6.7253	0.000475862	0.00584073
FBgn0003062	FBgn0003062	FBgn0003062	Fib	-0.929741	-0.932254	2.60975	0.000478364	0.00586236
FBgn0259110	FBgn0259110	FBgn0259110	mmd	-0.779124	-0.779152	7.99608	0.00048153	0.00589206
FBgn0037469	FBgn0037469	FBgn0037469	Dpck	0.820084	0.821123	2.47677	0.000484529	0.00591253
FBgn0000018	FBgn0000018	FBgn0000018	abo	1.0022	1.00333	3.24046	0.000485577	0.00591253
FBgn0036145	FBgn0036145	FBgn0036145	CG7607	-0.877973	-0.879875	2.22551	0.000485979	0.00591253
FBgn0028658	FBgn0028658	FBgn0028658	Adat1	0.920034	0.920812	3.35948	0.000486186	0.00591253
FBgn0038418	FBgn0038418	FBgn0038418	pad	-0.928314	-0.929106	4.01573	0.000487568	0.00592025
FBgn0026566	FBgn0026566	FBgn0026566	CG1307	0.788112	0.789039	3.18571	0.000495006	0.00600138
FBgn0034795	FBgn0034795	FBgn0034795	MED23	-0.803381	-0.803711	4.67723	0.000507399	0.00614223
FBgn0029859	FBgn0029859	FBgn0029859	CG15892	0.689378	0.689599	5.0056	0.000510214	0.00616403
FBgn0038334	FBgn0038334	FBgn0038334	h-cup	0.995389	0.997909	1.68575	0.000510754	0.00616403
FBgn0050390	FBgn0050390	FBgn0050390	Sgf29	-1.11731	-1.12044	2.29788	0.000515191	0.00620813
FBgn0024975	FBgn0024975	FBgn0024975	CG2712	-0.829989	-0.831134	3.1566	0.000516926	0.00621019
FBgn0085434	FBgn0085434	FBgn0085434	NaCP60E	-0.677148	-0.677157	9.54759	0.000516929	0.00621019
FBgn0000038	FBgn0000038	FBgn0000038	nAChRbeta1	-0.773536	-0.773598	6.88831	0.000518972	0.00622357
FBgn0033538	FBgn0033538	FBgn0033538	CG11883	-0.716733	-0.716961	5.09665	0.000519612	0.00622357
FBgn0032202	FBgn0032202	FBgn0032202	REPTOR-BP	-1.03402	-1.03592	2.60956	0.000526137	0.00629222
FBgn0036886	FBgn0036886	FBgn0036886	CG9300	-0.803324	-0.80467	2.68026	0.000534149	0.00637841
FBgn0036124	FBgn0036124	FBgn0036124	CG7839	-0.765043	-0.765541	4.45767	0.000543583	0.00648131
FBgn0039302	FBgn0039302	FBgn0039302	Nup358	-0.629149	-0.629169	8.50148	0.000544443	0.00648181
FBgn0030985	FBgn0030985	FBgn0030985	Obp18a	0.926869	0.927601	3.54314	0.00055178	0.00655932
FBgn0085382	FBgn0085382	FBgn0085382	CG34353	-0.668142	-0.668258	5.86952	0.000558903	0.00663404
FBgn0038590	FBgn0038590	FBgn0038590	CG12320	-0.899174	-0.901063	2.38633	0.000566117	0.00670963
FBgn0028875	FBgn0028875	FBgn0028875	nAChRalpha5	-0.74856	-0.74861	7.19432	0.000570173	0.0067414
FBgn0010551	FBgn0010551	FBgn0010551	Phb2	1.13154	1.13167	6.38735	0.000571168	0.0067414
FBgn0038295	FBgn0038295	FBgn0038295	Gyc88E	-0.83184	-0.832532	3.71066	0.000571348	0.0067414
FBgn0264959	FBgn0264959	FBgn0264959	Src42A	-0.545207	-0.545225	8.2019	0.000576681	0.00677966
FBgn0033665	FBgn0033665	FBgn0033665	Zip48C	0.72165	0.722209	3.74879	0.000576922	0.00677966
FBgn0025629	FBgn0025629	FBgn0025629	CG4045	0.776459	0.777002	3.70627	0.000577156	0.00677966
FBgn0003867	FBgn0003867	FBgn0003867	tsl	0.750992	0.751188	5.07651	0.000582025	0.00682674
FBgn0037933	FBgn0037933	FBgn0037933	Ho	0.730477	0.731294	3.5613	0.000588395	0.00689126
FBgn0051249	FBgn0051249	FBgn0051249	CG31249	0.851299	0.852454	3.1719	0.000600275	0.00702003
FBgn0037350	FBgn0037350	FBgn0037350	CG2911	-0.800052	-0.801248	3.2149	0.000602766	0.00703177
FBgn0005775	FBgn0005775	FBgn0005775	Con	-0.751156	-0.751334	5.27084	0.000603053	0.00703177
FBgn0032262	FBgn0032262	FBgn0032262	CG7384	1.21852	1.22	2.94748	0.000621702	0.00723859
FBgn0027589	FBgn0027589	FBgn0027589	CG1688	0.818455	0.818587	5.57146	0.000625188	0.0072685
FBgn0002905	FBgn0002905	FBgn0002905	DNApol-theta	-0.719364	-0.719864	4.32084	0.000630171	0.0073157
FBgn0034962	FBgn0034962	FBgn0034962	MAN1	-0.758612	-0.759153	4.16833	0.00063138	0.00731902
FBgn0020279	FBgn0020279	FBgn0020279	lig	-0.56545	-0.565466	8.58129	0.000635832	0.00735987
FBgn0036992	FBgn0036992	FBgn0036992	Hpd	0.775627	0.775661	7.21846	0.000647432	0.00748322
FBgn0267486	FBgn0267486	FBgn0267486	Ptp36E	-0.647239	-0.647369	5.73824	0.000654169	0.00754702
FBgn0262018	FBgn0262018	FBgn0262018	CadN2	-0.707156	-0.70728	5.85894	0.000654856	0.00754702
FBgn0250757	FBgn0250757	FBgn0250757	CG42235	-0.775863	-0.776059	4.91885	0.000659933	0.00758438
FBgn0014189	FBgn0014189	FBgn0014189	Hel25E	-0.633748	-0.633895	5.6355	0.000660011	0.00758438
FBgn0036624	FBgn0036624	FBgn0036624	RAF2	-0.79764	-0.797967	4.8638	0.000663696	0.00760817
FBgn0026252	FBgn0026252	FBgn0026252	msk	-0.689362	-0.689446	6.66321	0.000664	0.00760817
FBgn0266417	FBgn0266417	FBgn0266417	ringer	-0.666414	-0.666695	4.65909	0.000667256	0.00763445
FBgn0052425	FBgn0052425	FBgn0052425	CG32425	-0.596182	-0.596231	7.1758	0.000692133	0.00790767
FBgn0052438	FBgn0052438	FBgn0052438	SMC5	-0.626273	-0.626464	5.099	0.000698284	0.00796646
FBgn0029783	FBgn0029783	FBgn0029783	Sirt4	0.944981	0.945915	3.36339	0.000700955	0.00798421
FBgn0010379	FBgn0010379	FBgn0010379	Akt1	-0.650424	-0.650488	6.86245	0.000701853	0.00798421
FBgn0035708	FBgn0035708	FBgn0035708	axed	-0.782421	-0.782939	4.16521	0.000708645	0.00804992
FBgn0039420	FBgn0039420	FBgn0039420	CG6154	-0.825863	-0.826493	3.69267	0.000710406	0.00805838
FBgn0039048	FBgn0039048	FBgn0039048	CG17111	0.914068	0.914115	7.0631	0.000711846	0.00806318
FBgn0039635	FBgn0039635	FBgn0039635	Pdhb	0.571947	0.572015	6.06758	0.00071442	0.00808079
FBgn0003654	FBgn0003654	FBgn0003654	sw	-0.612898	-0.612964	6.5754	0.000722987	0.0081574
FBgn0259483	FBgn0259483	FBgn0259483	Mob4	0.761073	0.761284	5.15349	0.00072325	0.0081574
FBgn0033367	FBgn0033367	FBgn0033367	PPO2	-0.759332	-0.759507	5.27743	0.000725148	0.00816718
FBgn0034345	FBgn0034345	FBgn0034345	CG5174	-0.669754	-0.66978	8.13462	0.000726893	0.00817522
FBgn0038269	FBgn0038269	FBgn0038269	Rrp6	-0.770146	-0.770557	4.60927	0.00072826	0.008179
FBgn0004919	FBgn0004919	FBgn0004919	gol	-1.02089	-1.02091	9.38207	0.000730918	0.00819724
FBgn0263603	FBgn0263603	FBgn0263603	Zn72D	-0.606045	-0.606069	8.04588	0.000738265	0.00826795
FBgn0267347	FBgn0267347	FBgn0267347	squ	-0.942814	-0.945256	2.16694	0.000741547	0.00829299
FBgn0043456	FBgn0043456	FBgn0043456	Ndf	-0.586444	-0.586534	6.31121	0.000743354	0.00830149
FBgn0266672	FBgn0266672	FBgn0266672	Sec8	-0.590579	-0.590621	6.92229	0.000763625	0.00851587
FBgn0038432	FBgn0038432	FBgn0038432	CG14883	-0.896491	-0.897036	4.35981	0.000766493	0.00853584
FBgn0035159	FBgn0035159	FBgn0035159	CG13896	-0.939622	-0.940743	3.5183	0.000772407	0.00858965
FBgn0034081	FBgn0034081	FBgn0034081	CG10731	-0.977482	-0.981386	1.29963	0.000779005	0.00865088
FBgn0000567	FBgn0000567	FBgn0000567	Eip74EF	0.633032	0.633047	8.65148	0.000788885	0.00874835
FBgn0034490	FBgn0034490	FBgn0034490	CG9864	0.921277	0.92217	3.42643	0.000793657	0.00878851
FBgn0062978	FBgn0062978	FBgn0062978	CG31808	0.604977	0.60509	5.38128	0.000794723	0.00878851
FBgn0032478	FBgn0032478	FBgn0032478	CG5458	0.814483	0.814606	5.4415	0.000796201	0.00879259
FBgn0033209	FBgn0033209	FBgn0033209	CG12107	-0.839353	-0.840877	2.57533	0.000805695	0.00888506
FBgn0031093	FBgn0031093	FBgn0031093	CG9581	1.16824	1.16891	4.03326	0.000810448	0.00891307
FBgn0020278	FBgn0020278	FBgn0020278	loco	-0.734719	-0.7349	5.52684	0.000810484	0.00891307
FBgn0033564	FBgn0033564	FBgn0033564	Pex6	-0.749192	-0.749634	4.21631	0.000813879	0.00893801
FBgn0032400	FBgn0032400	FBgn0032400	CG6770	0.654102	0.654155	6.85794	0.0008194	0.00898226
FBgn0001150	FBgn0001150	FBgn0001150	gt	0.836778	0.836868	5.88677	0.000820174	0.00898226
FBgn0038498	FBgn0038498	FBgn0038498	beat-IIa	-0.727139	-0.727429	4.57141	0.000843631	0.00922641
FBgn0051004	FBgn0051004	FBgn0051004	mesh	1.62845	1.62875	5.62593	0.000853078	0.00931688
FBgn0085383	FBgn0085383	FBgn0085383	CG34354	-0.723047	-0.723242	5.19938	0.000854839	0.00932327
FBgn0038156	FBgn0038156	FBgn0038156	side-IV	-0.647436	-0.647532	6.0357	0.000856406	0.00932402
FBgn0083949	FBgn0083949	FBgn0083949	side-III	-0.68347	-0.683537	6.58067	0.000857259	0.00932402
FBgn0015622	FBgn0015622	FBgn0015622	Cnx99A	1.00806	1.00807	10.0977	0.000862339	0.00936642
FBgn0250753	FBgn0250753	FBgn0250753	kra	-0.674679	-0.674708	8.03946	0.000865619	0.00938919
FBgn0262869	FBgn0262869	FBgn0262869	Gfrl	-0.676504	-0.676552	7.06269	0.000873242	0.00945163
FBgn0004391	FBgn0004391	FBgn0004391	shtd	-0.714991	-0.715433	4.23998	0.00087376	0.00945163
FBgn0020443	FBgn0020443	FBgn0020443	eRF3	-0.587389	-0.587467	6.52787	0.00087622	0.00946533
FBgn0037151	FBgn0037151	FBgn0037151	CG7130	0.864324	0.866717	2.57614	0.0008783	0.00947488
FBgn0038581	FBgn0038581	FBgn0038581	CG14314	-0.683755	-0.684396	3.60779	0.000881419	0.00949561
FBgn0265296	FBgn0265296	FBgn0265296	Dscam2	-0.714371	-0.714396	8.13319	0.000884417	0.00951325
FBgn0034498	FBgn0034498	FBgn0034498	CG16868	-0.735148	-0.735401	5.00435	0.000885456	0.00951325
FBgn0028402	FBgn0028402	FBgn0028402	Sin	-0.804282	-0.805401	2.86048	0.000911145	0.009776
FBgn0035488	FBgn0035488	FBgn0035488	CG11593	-0.647979	-0.648137	5.45032	0.000916302	0.00981259
FBgn0038165	FBgn0038165	FBgn0038165	Task6	-0.696877	-0.697032	5.51001	0.000917975	0.00981259
FBgn0051973	FBgn0051973	FBgn0051973	Cda5	0.662386	0.662421	7.36433	0.000918755	0.00981259
FBgn0051324	FBgn0051324	FBgn0051324	CG31324	-1.92495	-1.92514	6.73006	0.000919505	0.00981259
FBgn0259245	FBgn0259245	FBgn0259245	DIP-beta	-0.81871	-0.819313	3.86514	0.000920881	0.00981406
FBgn0053293	FBgn0053293	FBgn0053293	CG33293	-0.805589	-0.806079	4.22311	0.000927972	0.00987522
FBgn0035544	FBgn0035544	FBgn0035544	CG15021	0.817653	0.818058	4.34362	0.000929111	0.00987522
FBgn0037698	FBgn0037698	FBgn0037698	CG16779	-0.629541	-0.629571	7.5882	0.000936892	0.0099446
FBgn0038461	FBgn0038461	FBgn0038461	CG3678	-0.890421	-0.891743	2.83509	0.000950556	0.0100762
FBgn0033904	FBgn0033904	FBgn0033904	CG18327	-0.751069	-0.751997	3.01632	0.000953475	0.0100874
FBgn0032782	FBgn0032782	FBgn0032782	Rab9	0.677416	0.677614	5.10806	0.000954163	0.0100874
FBgn0037736	FBgn0037736	FBgn0037736	side-VII	-0.628459	-0.628522	6.89016	0.000963834	0.0101761
FBgn0038837	FBgn0038837	FBgn0038837	KaiR1D	-0.716897	-0.717231	4.59527	0.000968032	0.0102068
FBgn0031977	FBgn0031977	FBgn0031977	baf	-0.870356	-0.8716	3.27052	0.000973348	0.0102492
FBgn0263977	FBgn0263977	FBgn0263977	Tim17b	-0.648063	-0.648305	4.93114	0.000987481	0.0103843
FBgn0035703	FBgn0035703	FBgn0035703	CG8270	-0.823488	-0.824851	2.84441	0.000993194	0.0104305
FBgn0029999	FBgn0029999	FBgn0029999	CG1575	0.877525	0.878814	2.58541	0.000999838	0.0104793
FBgn0027580	FBgn0027580	FBgn0027580	PCB	-0.638272	-0.638286	9.18931	0.00100048	0.0104793
FBgn0259111	FBgn0259111	FBgn0259111	Ndae1	0.656942	0.656962	8.44027	0.00100276	0.0104893
FBgn0052432	FBgn0052432	FBgn0052432	CG32432	-0.715163	-0.715213	7.02481	0.00100623	0.0105117
FBgn0052523	FBgn0052523	FBgn0052523	CG32523	-0.887753	-0.888975	3.20747	0.00101162	0.0105541
FBgn0030051	FBgn0030051	FBgn0030051	spirit	0.772124	0.773261	2.76354	0.00101793	0.010606
FBgn0032907	FBgn0032907	FBgn0032907	CG9272	0.820133	0.821114	2.96369	0.00102024	0.0106161
FBgn0030086	FBgn0030086	FBgn0030086	CCT2	0.784678	0.784776	6.36805	0.00102222	0.0106227
FBgn0035106	FBgn0035106	FBgn0035106	rno	-0.54635	-0.54637	8.16867	0.00102635	0.0106517
FBgn0261602	FBgn0261602	FBgn0261602	RpL8	0.721485	0.721512	7.9499	0.00103124	0.0106724
FBgn0010416	FBgn0010416	FBgn0010416	TH1	-0.755207	-0.755901	3.66679	0.00103162	0.0106724
FBgn0024189	FBgn0024189	FBgn0024189	sns	-0.602374	-0.602428	6.77634	0.00103272	0.0106724
FBgn0027055	FBgn0027055	FBgn0027055	CSN3	-0.729266	-0.729813	3.87346	0.00103373	0.0106724
FBgn0032151	FBgn0032151	FBgn0032151	nAChRalpha6	-0.756257	-0.756306	7.25455	0.00103507	0.0106724
FBgn0010531	FBgn0010531	FBgn0010531	Ccs	0.82492	0.825436	3.998	0.00104134	0.0107118
FBgn0004619	FBgn0004619	FBgn0004619	GluRIA	-0.762	-0.762437	4.15082	0.00104159	0.0107118
FBgn0033221	FBgn0033221	FBgn0033221	CG12825	0.780722	0.781164	3.71962	0.00105644	0.0108411
FBgn0028496	FBgn0028496	FBgn0028496	CG30116	-0.636759	-0.636813	6.82247	0.00105728	0.0108411
FBgn0052141	FBgn0052141	FBgn0052141	saturn	-0.842932	-0.844981	2.17043	0.00105827	0.0108411
FBgn0034951	FBgn0034951	FBgn0034951	CG3860	-0.692236	-0.692357	5.80962	0.00106088	0.0108539
FBgn0050203	FBgn0050203	FBgn0050203	CG30203	1.40304	1.40319	6.44704	0.00107802	0.0110067
FBgn0037843	FBgn0037843	FBgn0037843	CG4511	-0.644892	-0.645369	4.35294	0.00107859	0.0110067
FBgn0003028	FBgn0003028	FBgn0003028	ovo	0.620716	0.620858	5.10107	0.00108374	0.011045
FBgn0038870	FBgn0038870	FBgn0038870	Oga	-0.672353	-0.672631	4.78647	0.00109044	0.0110989
FBgn0037167	FBgn0037167	FBgn0037167	CG11425	1.78346	1.78479	3.26366	0.00109952	0.011177
FBgn0029518	FBgn0029518	FBgn0029518	CG13376	1.15798	1.15947	2.70126	0.00110544	0.0112157
FBgn0034021	FBgn0034021	FBgn0034021	CG8180	0.697155	0.697309	5.18631	0.00110615	0.0112157
FBgn0262476	FBgn0262476	FBgn0262476	CG43066	-0.647305	-0.647375	6.33705	0.00111351	0.0112758
FBgn0038327	FBgn0038327	FBgn0038327	Trax	-0.795207	-0.796623	2.77061	0.00112241	0.0113515
FBgn0032210	FBgn0032210	FBgn0032210	CYLD	-0.565317	-0.565414	6.07565	0.00112523	0.0113656
FBgn0264089	FBgn0264089	FBgn0264089	sli	-0.577545	-0.57757	8.02919	0.00112935	0.0113909
FBgn0014023	FBgn0014023	FBgn0014023	mRpL47	-0.804485	-0.806189	2.42121	0.00113061	0.0113909
FBgn0039023	FBgn0039023	FBgn0039023	Nepl14	0.79605	0.796978	2.99559	0.00113933	0.0114582
FBgn0036022	FBgn0036022	FBgn0036022	CG8329	-0.832286	-0.832467	5.81682	0.00114018	0.0114582
FBgn0034975	FBgn0034975	FBgn0034975	enok	-0.58653	-0.586581	6.91031	0.00114365	0.0114764
FBgn0011638	FBgn0011638	FBgn0011638	La	-0.758723	-0.75921	4.4148	0.00114489	0.0114764
FBgn0037924	FBgn0037924	FBgn0037924	CG14712	-0.720545	-0.72088	4.78957	0.00115227	0.0115358
FBgn0029672	FBgn0029672	FBgn0029672	CG2875	-0.768303	-0.768946	3.51389	0.00115472	0.0115457
FBgn0285944	FBgn0285944	FBgn0285944	para	-0.721398	-0.721409	9.21069	0.0011793	0.0117675
FBgn0032797	FBgn0032797	FBgn0032797	Hasp	-0.666794	-0.666815	8.14778	0.00117987	0.0117675
FBgn0039212	FBgn0039212	FBgn0039212	Syx18	-0.892066	-0.893741	2.61256	0.00119207	0.0118619
FBgn0036684	FBgn0036684	FBgn0036684	CG3764	-0.647861	-0.647928	6.85122	0.00119233	0.0118619
FBgn0032266	FBgn0032266	FBgn0032266	CG18302	0.829455	0.830491	2.54148	0.00119532	0.0118768
FBgn0031493	FBgn0031493	FBgn0031493	Sf3b2	-0.670343	-0.670645	4.59488	0.00120419	0.01195
FBgn0033252	FBgn0033252	FBgn0033252	CG12769	-0.599916	-0.600062	5.49645	0.00121877	0.0120795
FBgn0267033	FBgn0267033	FBgn0267033	mamo	0.706255	0.706261	10.1506	0.0012302	0.0121771
FBgn0250907	FBgn0250907	FBgn0250907	Cht10	-0.900429	-0.901745	3.65435	0.00123169	0.0121771
FBgn0085438	FBgn0085438	FBgn0085438	CG34409	0.863842	0.864141	4.63503	0.00124056	0.0122496
FBgn0034933	FBgn0034933	FBgn0034933	CG3735	-0.889703	-0.890977	3.42453	0.00124414	0.0122696
FBgn0023130	FBgn0023130	FBgn0023130	a6	0.617585	0.617636	6.47069	0.00125376	0.0123491
FBgn0051453	FBgn0051453	FBgn0051453	pch2	-0.962033	-0.965738	1.70089	0.00125684	0.0123641
FBgn0033951	FBgn0033951	FBgn0033951	CG10139	-0.854632	-0.857108	2.23169	0.00127451	0.0125224
FBgn0034390	FBgn0034390	FBgn0034390	CG15093	0.795881	0.796418	3.86618	0.00127807	0.0125356
FBgn0024983	FBgn0024983	FBgn0024983	CG4293	-0.703952	-0.704698	3.6596	0.00127902	0.0125356
FBgn0001404	FBgn0001404	FBgn0001404	egh	-0.556047	-0.556092	7.11589	0.00128311	0.0125602
FBgn0040502	FBgn0040502	FBgn0040502	CG8343	-0.828881	-0.829037	5.99441	0.00129362	0.0126474
FBgn0267796	FBgn0267796	FBgn0267796	Tmc	-0.72105	-0.722032	2.96761	0.00129768	0.0126716
FBgn0031660	FBgn0031660	FBgn0031660	mRpL28	0.691843	0.692031	5.11004	0.00131829	0.0128569
FBgn0033031	FBgn0033031	FBgn0033031	CG8245	-0.685778	-0.686089	4.52211	0.00132289	0.0128732
FBgn0029502	FBgn0029502	FBgn0029502	Coq7	0.744566	0.744854	4.52126	0.0013232	0.0128732
FBgn0002780	FBgn0002780	FBgn0002780	mod	-0.733505	-0.733883	4.64266	0.00133769	0.0129983
FBgn0004622	FBgn0004622	FBgn0004622	TkR99D	-0.911938	-0.913147	2.95925	0.00134885	0.0130906
FBgn0038861	FBgn0038861	FBgn0038861	CG7009	-0.92944	-0.932229	1.99209	0.00135865	0.0131696
FBgn0000042	FBgn0000042	FBgn0000042	Act5C	0.662854	0.662869	8.83589	0.00136531	0.013218
FBgn0039623	FBgn0039623	FBgn0039623	CG1951	-0.632248	-0.632378	5.80756	0.00137041	0.0132512
FBgn0038980	FBgn0038980	FBgn0038980	Octbeta1R	-0.641661	-0.641882	4.66221	0.00138093	0.0133366
FBgn0035541	FBgn0035541	FBgn0035541	CG15019	-0.885785	-0.887892	2.48013	0.00138329	0.0133432
FBgn0003380	FBgn0003380	FBgn0003380	Sh	0.741036	0.741037	12.9495	0.00138751	0.0133676
FBgn0038246	FBgn0038246	FBgn0038246	CG14853	-0.753954	-0.754187	5.01115	0.00139535	0.0134269
FBgn0028481	FBgn0028481	FBgn0028481	CG4341	-0.702606	-0.702722	5.87575	0.00140199	0.0134709
FBgn0039290	FBgn0039290	FBgn0039290	CG13654	-0.6974	-0.697818	4.02677	0.00140333	0.0134709
FBgn0085386	FBgn0085386	FBgn0085386	CG34357	-0.650739	-0.650903	5.34963	0.00141295	0.0135469
FBgn0003326	FBgn0003326	FBgn0003326	sca	-0.728465	-0.729096	3.51669	0.00141914	0.0135898
FBgn0020412	FBgn0020412	FBgn0020412	JIL-1	-0.625423	-0.625482	7.02088	0.00144292	0.0138009
FBgn0004556	FBgn0004556	FBgn0004556	Dbp73D	-0.937177	-0.940964	1.61787	0.00145213	0.0138722
FBgn0036052	FBgn0036052	FBgn0036052	CG10809	-0.68451	-0.685234	3.52426	0.00145849	0.0139022
FBgn0003279	FBgn0003279	FBgn0003279	RpL4	0.699281	0.699303	8.34966	0.00145878	0.0139022
FBgn0033783	FBgn0033783	FBgn0033783	CG17019	-0.574498	-0.57461	5.79238	0.00146746	0.0139681
FBgn0027503	FBgn0027503	FBgn0027503	CG11970	-0.607673	-0.607824	5.56783	0.00146948	0.0139706
FBgn0021738	FBgn0021738	FBgn0021738	Crg-1	0.728994	0.729095	6.49737	0.00148074	0.0140608
FBgn0028509	FBgn0028509	FBgn0028509	CenG1A	-0.645239	-0.645248	9.54771	0.00148706	0.0141039
FBgn0283712	FBgn0283712	FBgn0283712	LIMK1	-0.568722	-0.568741	8.38563	0.00149851	0.0141955
FBgn0259938	FBgn0259938	FBgn0259938	cwo	-1.67963	-1.6797	8.14328	0.00151135	0.0143001
FBgn0034243	FBgn0034243	FBgn0034243	Ns2	-0.6889	-0.689416	3.87695	0.00151905	0.0143558
FBgn0050021	FBgn0050021	FBgn0050021	metro	-0.581489	-0.581573	6.12382	0.00153285	0.014469
FBgn0001989	FBgn0001989	FBgn0001989	ND-B17	0.573735	0.573907	4.83886	0.00154319	0.0145493
FBgn0261268	FBgn0261268	FBgn0261268	Cul3	-0.588423	-0.58847	7.10194	0.00154711	0.0145689
FBgn0034743	FBgn0034743	FBgn0034743	RpS16	0.705357	0.705425	6.54899	0.00157738	0.0147568
FBgn0261698	FBgn0261698	FBgn0261698	SLO2	-0.622813	-0.622846	7.53707	0.00157802	0.0147568
FBgn0034290	FBgn0034290	FBgn0034290	CG5773	0.73827	0.739006	3.59609	0.0015784	0.0147568
FBgn0053178	FBgn0053178	FBgn0053178	CG33178	0.760759	0.761607	3.05147	0.00157892	0.0147568
FBgn0024273	FBgn0024273	FBgn0024273	WASp	-0.547005	-0.547054	6.9359	0.00158038	0.0147568
FBgn0030272	FBgn0030272	FBgn0030272	CG15201	0.617392	0.617615	4.62904	0.00158045	0.0147568
FBgn0004168	FBgn0004168	FBgn0004168	5-HT1A	-0.627035	-0.627222	4.95307	0.00158101	0.0147568
FBgn0031998	FBgn0031998	FBgn0031998	SLC5A11	0.838477	0.838537	7.09575	0.00158195	0.0147568
FBgn0033302	FBgn0033302	FBgn0033302	Cyp6a14	0.811795	0.812708	2.69287	0.00159289	0.0148414
FBgn0085390	FBgn0085390	FBgn0085390	Dgk	-0.613761	-0.613839	6.19782	0.00159727	0.0148648
FBgn0052694	FBgn0052694	FBgn0052694	CG32694	0.654488	0.654547	6.30664	0.00162366	0.0150926
FBgn0037680	FBgn0037680	FBgn0037680	pasi2	-0.751597	-0.752095	4.34261	0.00164329	0.0152406
FBgn0032821	FBgn0032821	FBgn0032821	CdGAPr	-0.786614	-0.786643	8.01671	0.00164342	0.0152406
FBgn0002354	FBgn0002354	FBgn0002354	l(3)87Df	-0.922591	-0.92518	1.81601	0.00165273	0.0153
FBgn0033309	FBgn0033309	FBgn0033309	Lnpk	0.650913	0.651048	5.37767	0.00165368	0.0153
FBgn0001078	FBgn0001078	FBgn0001078	ftz-f1	0.599379	0.599419	7.28004	0.00166654	0.0154009
FBgn0284421	FBgn0284421	FBgn0284421	Psn	-0.642738	-0.642901	5.36971	0.00167191	0.0154286
FBgn0037652	FBgn0037652	FBgn0037652	CG11980	-0.671259	-0.672131	3.1542	0.00167343	0.0154286
FBgn0051715	FBgn0051715	FBgn0051715	CG31715	-0.908994	-0.910452	2.9805	0.00167653	0.0154392
FBgn0035290	FBgn0035290	FBgn0035290	dsb	0.776551	0.776648	5.95987	0.0016819	0.0154707
FBgn0083963	FBgn0083963	FBgn0083963	Nlg3	-0.643291	-0.643384	6.02702	0.00168473	0.0154788
FBgn0031094	FBgn0031094	FBgn0031094	CG9578	-0.738446	-0.739395	2.77799	0.00168691	0.0154809
FBgn0003227	FBgn0003227	FBgn0003227	rec	-0.587684	-0.587811	5.64038	0.00169086	0.0154993
FBgn0039175	FBgn0039175	FBgn0039175	beta-PheRS	0.89732	0.897663	4.5532	0.00169509	0.0155009
FBgn0031011	FBgn0031011	FBgn0031011	CG8034	0.722472	0.722526	7.04605	0.00169597	0.0155009
FBgn0265174	FBgn0265174	FBgn0265174	PIG-V	-0.74953	-0.750968	3.27923	0.0016969	0.0155009
FBgn0028424	FBgn0028424	FBgn0028424	JhI-26	0.639434	0.639852	3.80767	0.00172495	0.0157389
FBgn0031263	FBgn0031263	FBgn0031263	Tspo	0.714966	0.715077	6.2372	0.00173031	0.015765
FBgn0035285	FBgn0035285	FBgn0035285	CG12025	0.54661	0.546656	6.91665	0.00173179	0.015765
FBgn0051118	FBgn0051118	FBgn0051118	RabX4	-0.666767	-0.667237	4.04917	0.00174136	0.015834
FBgn0001092	FBgn0001092	FBgn0001092	Gapdh2	-0.637087	-0.637156	6.66234	0.00174361	0.0158363
FBgn0013756	FBgn0013756	FBgn0013756	Mtor	-0.559298	-0.559345	7.017	0.00174901	0.0158672
FBgn0033899	FBgn0033899	FBgn0033899	CG13016	-0.842478	-0.844637	2.433	0.00175191	0.0158753
FBgn0085444	FBgn0085444	FBgn0085444	mute	-0.573138	-0.573319	5.259	0.00175899	0.0159122
FBgn0015360	FBgn0015360	FBgn0015360	oxt	-0.582498	-0.582673	5.16842	0.00176	0.0159122
FBgn0015011	FBgn0015011	FBgn0015011	AhcyL2	0.73549	0.736074	3.53532	0.0017709	0.0159926
FBgn0034214	FBgn0034214	FBgn0034214	CG6550	-0.794128	-0.795773	2.42287	0.00178103	0.016065
FBgn0038653	FBgn0038653	FBgn0038653	Octalpha2R	-0.558109	-0.558185	6.12478	0.00178297	0.016065
FBgn0035333	FBgn0035333	FBgn0035333	CG1317	-0.59707	-0.597144	6.38938	0.00178578	0.016072
FBgn0032026	FBgn0032026	FBgn0032026	CG7627	-0.674327	-0.674463	6.11334	0.00180765	0.0162504
FBgn0003285	FBgn0003285	FBgn0003285	rst	0.688361	0.688415	7.10043	0.00181545	0.0163021
FBgn0034063	FBgn0034063	FBgn0034063	CG8389	-0.687117	-0.687763	3.50963	0.00182191	0.0163258
FBgn0035715	FBgn0035715	FBgn0035715	CG10103	-0.665893	-0.665952	7.1195	0.00182222	0.0163258
FBgn0000120	FBgn0000120	FBgn0000120	Arr1	0.605985	0.605987	11.3737	0.0018302	0.0163788
FBgn0028436	FBgn0028436	FBgn0028436	ECSIT	0.677572	0.678333	3.09432	0.00183323	0.0163875
FBgn0030828	FBgn0030828	FBgn0030828	CG5162	0.707927	0.708078	5.20315	0.00184205	0.0164478
FBgn0037166	FBgn0037166	FBgn0037166	CG11426	1.46831	1.46866	4.96103	0.00184959	0.0164863
FBgn0264574	FBgn0264574	FBgn0264574	Glut1	-0.652052	-0.652076	8.013	0.00185063	0.0164863
FBgn0264503	FBgn0264503	FBgn0264503	CG43902	-0.614644	-0.6148	5.20823	0.0018526	0.0164863
FBgn0266719	FBgn0266719	FBgn0266719	stac	-0.699789	-0.699875	6.91548	0.00187129	0.016634
FBgn0264694	FBgn0264694	FBgn0264694	mgr	-0.717279	-0.718164	3.3787	0.00187412	0.0166404
FBgn0026313	FBgn0026313	FBgn0026313	X11L	-0.510223	-0.510247	7.7037	0.00187814	0.0166575
FBgn0035762	FBgn0035762	FBgn0035762	Rint1	-0.627567	-0.628019	4.13839	0.00189204	0.016762
FBgn0003870	FBgn0003870	FBgn0003870	ttk	0.645135	0.645147	9.20609	0.00191127	0.0168999
FBgn0052204	FBgn0052204	FBgn0052204	CG32204	-0.665483	-0.665938	3.87092	0.00191187	0.0168999
FBgn0038146	FBgn0038146	FBgn0038146	CG9799	-0.737365	-0.738394	3.03975	0.00191861	0.0169406
FBgn0028534	FBgn0028534	FBgn0028534	CG7916	-0.758354	-0.759303	2.98076	0.00194104	0.0171196
FBgn0020767	FBgn0020767	FBgn0020767	Spred	-0.564584	-0.564613	7.4061	0.00195101	0.0171884
FBgn0030877	FBgn0030877	FBgn0030877	Arp8	0.861546	0.862492	2.8816	0.001959	0.0172397
FBgn0040505	FBgn0040505	FBgn0040505	Alk	-0.606026	-0.606071	6.9278	0.00196431	0.0172672
FBgn0011582	FBgn0011582	FBgn0011582	Dop1R1	-0.647687	-0.647772	6.08062	0.00197219	0.0173048
FBgn0083969	FBgn0083969	FBgn0083969	CG34133	0.670668	0.670691	7.91023	0.00197648	0.0173048
FBgn0025809	FBgn0025809	FBgn0025809	Paf-AHalpha	0.663072	0.66349	3.9042	0.00197696	0.0173048
FBgn0053978	FBgn0053978	FBgn0053978	CG33978	0.61788	0.617926	6.69465	0.00197732	0.0173048
FBgn0024992	FBgn0024992	FBgn0024992	Spg7	0.704128	0.704222	6.11268	0.00198741	0.0173739
FBgn0024232	FBgn0024232	FBgn0024232	gprs	-0.603875	-0.603976	5.8814	0.00199712	0.0174396
FBgn0016070	FBgn0016070	FBgn0016070	smg	0.620894	0.620922	7.65918	0.0020302	0.017709
FBgn0039698	FBgn0039698	FBgn0039698	CG7789	0.735017	0.735827	3.21657	0.00207381	0.0180695
FBgn0031575	FBgn0031575	FBgn0031575	Cep97	-0.59596	-0.596105	5.44116	0.00207901	0.0180759
FBgn0037766	FBgn0037766	FBgn0037766	Teh1	-0.657005	-0.657226	4.96164	0.00208135	0.0180759
FBgn0051217	FBgn0051217	FBgn0051217	modSP	0.638551	0.638698	5.19977	0.00208139	0.0180759
FBgn0051278	FBgn0051278	FBgn0051278	CG31278	-0.852972	-0.855617	2.00555	0.00208849	0.0181178
FBgn0250824	FBgn0250824	FBgn0250824	CG33655	-0.739953	-0.740513	3.97584	0.00212307	0.0183976
FBgn0033893	FBgn0033893	FBgn0033893	CG18371	0.629627	0.629835	4.70504	0.00216765	0.0187635
FBgn0038761	FBgn0038761	FBgn0038761	CG17190	0.789803	0.791008	2.28207	0.00218715	0.0189116
FBgn0020370	FBgn0020370	FBgn0020370	TppII	-0.526651	-0.526723	6.24625	0.00219767	0.0189818
FBgn0020389	FBgn0020389	FBgn0020389	Papss	-0.62367	-0.623953	4.62993	0.0022096	0.0190385
FBgn0038868	FBgn0038868	FBgn0038868	CG5862	0.685818	0.686153	4.35119	0.00221079	0.0190385
FBgn0034964	FBgn0034964	FBgn0034964	IntS1	-0.56377	-0.563885	5.72681	0.00221144	0.0190385
FBgn0031689	FBgn0031689	FBgn0031689	Cyp28d1	-0.59438	-0.594435	6.76382	0.00222133	0.0191029
FBgn0030071	FBgn0030071	FBgn0030071	CG12661	0.892242	0.893121	3.31537	0.00222772	0.0191372
FBgn0052026	FBgn0052026	FBgn0052026	CG32026	-0.700267	-0.700566	4.35321	0.00223655	0.0191922
FBgn0032935	FBgn0032935	FBgn0032935	Atg18b	-0.60463	-0.604733	6.15199	0.00224171	0.0192157
FBgn0034060	FBgn0034060	FBgn0034060	CG8370	-0.637727	-0.637953	5.12498	0.00224473	0.0192208
FBgn0259482	FBgn0259482	FBgn0259482	Mob3	-0.933737	-0.936304	2.22004	0.00226902	0.0194078
FBgn0083981	FBgn0083981	FBgn0083981	RunxA	-1.01852	-1.02001	3.16905	0.00227958	0.0194772
FBgn0038043	FBgn0038043	FBgn0038043	CG17202	0.868911	0.869902	3.21394	0.00228457	0.0194987
FBgn0032517	FBgn0032517	FBgn0032517	CG7099	-0.594105	-0.594359	4.69491	0.00228805	0.0195075
FBgn0005636	FBgn0005636	FBgn0005636	nvy	-0.772519	-0.773025	3.91061	0.00229814	0.019563
FBgn0033232	FBgn0033232	FBgn0033232	CG12159	0.718978	0.719952	2.88217	0.0023	0.019563
FBgn0010222	FBgn0010222	FBgn0010222	Nmdmc	1.17375	1.17428	4.4993	0.00230196	0.019563
FBgn0031734	FBgn0031734	FBgn0031734	CG11147	0.571914	0.571947	7.01492	0.00231336	0.0196388
FBgn0039207	FBgn0039207	FBgn0039207	CG5789	0.693823	0.693914	5.9986	0.00232022	0.0196454
FBgn0015000	FBgn0015000	FBgn0015000	betaggt-I	-0.658511	-0.658854	4.31835	0.00232086	0.0196454
FBgn0030187	FBgn0030187	FBgn0030187	Ipod	1.71178	1.71225	4.79109	0.00232158	0.0196454
FBgn0039450	FBgn0039450	FBgn0039450	Yif1	-0.714215	-0.715188	3.30499	0.00233365	0.0197266
FBgn0033864	FBgn0033864	FBgn0033864	CG18368	0.693244	0.69358	4.84341	0.00233764	0.0197392
FBgn0037063	FBgn0037063	FBgn0037063	CG9391	0.788298	0.788385	6.7922	0.00238044	0.0200793
FBgn0030010	FBgn0030010	FBgn0030010	CG10959	0.856053	0.857617	2.55023	0.00239542	0.0201842
FBgn0030407	FBgn0030407	FBgn0030407	Fpgs	-1.03305	-1.03689	1.81927	0.00240921	0.0202788
FBgn0052792	FBgn0052792	FBgn0052792	ppk8	0.707756	0.708202	3.46351	0.00241401	0.0202977
FBgn0051036	FBgn0051036	FBgn0051036	CG31036	0.726248	0.726375	5.97989	0.00243634	0.0204637
FBgn0011710	FBgn0011710	FBgn0011710	2021-09-01	0.568191	0.568344	4.91788	0.00244145	0.0204849
FBgn0085256	FBgn0085256	FBgn0085256	CG34227	-0.813831	-0.815018	3.3734	0.00244606	0.0205019
FBgn0020909	FBgn0020909	FBgn0020909	Rtc1	-0.843236	-0.846009	2.10002	0.00245282	0.0205369
FBgn0066084	FBgn0066084	FBgn0066084	RpL41	-0.822663	-0.82282	5.6303	0.00245626	0.020544
FBgn0019830	FBgn0019830	FBgn0019830	colt	0.601326	0.601475	5.13747	0.00246126	0.0205641
FBgn0010660	FBgn0010660	FBgn0010660	Nup214	-0.704482	-0.704677	5.53222	0.00246439	0.0205686
FBgn0040299	FBgn0040299	FBgn0040299	Myo28B1	0.882357	0.882533	5.98129	0.00246778	0.0205752
FBgn0039131	FBgn0039131	FBgn0039131	CG12268	0.8076	0.808977	2.38637	0.00247453	0.0205893
FBgn0038860	FBgn0038860	FBgn0038860	Ice2	-0.732835	-0.734196	2.58519	0.00247466	0.0205893
FBgn0050493	FBgn0050493	FBgn0050493	Coq9	-0.697514	-0.698368	3.50921	0.00247805	0.0205958
FBgn0030679	FBgn0030679	FBgn0030679	CG8206	0.691172	0.691432	4.60252	0.00248271	0.020613
FBgn0038110	FBgn0038110	FBgn0038110	CG8031	-0.727512	-0.728652	2.81711	0.00250736	0.0207959
FBgn0038535	FBgn0038535	FBgn0038535	alt	-0.554664	-0.554704	7.27615	0.00252128	0.0208854
FBgn0032225	FBgn0032225	FBgn0032225	CG5022	0.681169	0.681691	3.76477	0.00252343	0.0208854
FBgn0039044	FBgn0039044	FBgn0039044	p53	0.790777	0.791331	3.93992	0.00252903	0.02091
FBgn0020261	FBgn0020261	FBgn0020261	pcm	-0.583479	-0.583545	6.54772	0.00253293	0.0209204
FBgn0039089	FBgn0039089	FBgn0039089	beat-IV	-0.642176	-0.642456	4.41599	0.00253879	0.020947
FBgn0037107	FBgn0037107	FBgn0037107	CG7166	-0.571915	-0.572038	5.59146	0.00255554	0.0210633
FBgn0031650	FBgn0031650	FBgn0031650	CG14044	0.906593	0.907893	2.52925	0.00256951	0.0211564
FBgn0260936	FBgn0260936	FBgn0260936	scny	-0.592407	-0.592452	7.24846	0.00258894	0.0212817
FBgn0001324	FBgn0001324	FBgn0001324	kto	-0.537775	-0.537845	6.42291	0.00259009	0.0212817
FBgn0023001	FBgn0023001	FBgn0023001	melt	-0.685349	-0.686124	3.03546	0.00261137	0.0214343
FBgn0027334	FBgn0027334	FBgn0027334	l(1)G0004	-0.802312	-0.804436	2.18162	0.00262338	0.0214777
FBgn0051694	FBgn0051694	FBgn0051694	CG31694	-0.594744	-0.59478	7.5919	0.00262343	0.0214777
FBgn0036512	FBgn0036512	FBgn0036512	CG16979	-0.660429	-0.661037	3.56848	0.00262478	0.0214777
FBgn0034858	FBgn0034858	FBgn0034858	eIF2Bdelta	0.831669	0.831741	7.1114	0.00263275	0.0215207
FBgn0083975	FBgn0083975	FBgn0083975	Nlg4	-0.631029	-0.631128	5.96796	0.00265376	0.0216591
FBgn0034008	FBgn0034008	FBgn0034008	CG8152	0.699753	0.700363	3.58775	0.00265515	0.0216591
FBgn0036286	FBgn0036286	FBgn0036286	CG10616	-0.578693	-0.578958	4.62008	0.00269328	0.0219321
FBgn0033174	FBgn0033174	FBgn0033174	CG11125	0.785031	0.78654	2.93299	0.00269414	0.0219321
FBgn0050356	FBgn0050356	FBgn0050356	CG30356	-0.771722	-0.773241	2.44785	0.00269927	0.0219513
FBgn0001224	FBgn0001224	FBgn0001224	Hsp23	2.7197	2.721	5.9542	0.00270968	0.021983
FBgn0085369	FBgn0085369	FBgn0085369	Drgx	-0.693017	-0.693358	4.32613	0.00271154	0.021983
FBgn0039238	FBgn0039238	FBgn0039238	CG7016	0.708029	0.708707	3.32362	0.00271395	0.021983
FBgn0037963	FBgn0037963	FBgn0037963	Cad87A	-0.567943	-0.568023	6.17927	0.00271426	0.021983
FBgn0028370	FBgn0028370	FBgn0028370	kek3	-0.636585	-0.636772	5.16024	0.00271881	0.0219974
FBgn0038115	FBgn0038115	FBgn0038115	CG7966	0.688847	0.689196	3.97691	0.00272269	0.0220064
FBgn0051361	FBgn0051361	FBgn0051361	dpr17	-0.695149	-0.695541	4.26676	0.00273818	0.0220916
FBgn0016794	FBgn0016794	FBgn0016794	dos	-0.532093	-0.532168	6.24426	0.00273881	0.0220916
FBgn0034095	FBgn0034095	FBgn0034095	CG15701	0.824428	0.826465	2.0494	0.0027751	0.0223616
FBgn0015033	FBgn0015033	FBgn0015033	Cyp4d8	0.7779	0.778991	2.73356	0.00279803	0.0225234
FBgn0050463	FBgn0050463	FBgn0050463	Pgant9	-0.542916	-0.543	5.90332	0.00281001	0.0225777
FBgn0030768	FBgn0030768	FBgn0030768	CG9723	-0.700799	-0.701955	2.55058	0.00281047	0.0225777
FBgn0032511	FBgn0032511	FBgn0032511	ND-B22	-0.746501	-0.74785	2.51663	0.00283454	0.022748
FBgn0034860	FBgn0034860	FBgn0034860	CG9812	0.588251	0.588371	5.15548	0.0028586	0.0229002
FBgn0037619	FBgn0037619	FBgn0037619	CG8159	-0.775683	-0.777214	2.45135	0.00285927	0.0229002
FBgn0053193	FBgn0053193	FBgn0053193	sav	0.748115	0.748506	4.39424	0.00289848	0.0231908
FBgn0003656	FBgn0003656	FBgn0003656	sws	-0.504315	-0.504333	8.07908	0.00291529	0.0233018
FBgn0036509	FBgn0036509	FBgn0036509	CG7739	-0.673134	-0.673415	4.6901	0.00292083	0.0233225
FBgn0011225	FBgn0011225	FBgn0011225	jar	-0.577672	-0.577678	9.9722	0.00292977	0.0233587
FBgn0027091	FBgn0027091	FBgn0027091	CysRS	0.732351	0.732707	4.21885	0.00293126	0.0233587
FBgn0033021	FBgn0033021	FBgn0033021	CG10417	-0.609663	-0.609874	5.00533	0.0029474	0.0234531
FBgn0031736	FBgn0031736	FBgn0031736	CG11030	-0.61352	-0.613789	4.65525	0.00294947	0.0234531
FBgn0051815	FBgn0051815	FBgn0051815	CG31815	-0.560171	-0.560273	5.76735	0.00295322	0.0234531
FBgn0038589	FBgn0038589	FBgn0038589	CG18598	-0.750861	-0.751084	5.08953	0.00295812	0.0234531
FBgn0037342	FBgn0037342	FBgn0037342	CG2931	-0.816398	-0.817989	2.65182	0.00295824	0.0234531
FBgn0263231	FBgn0263231	FBgn0263231	bel	-0.543309	-0.543347	7.2808	0.00296085	0.0234531
FBgn0051183	FBgn0051183	FBgn0051183	CG31183	-0.561272	-0.561436	5.23591	0.00298683	0.0236187
FBgn0043783	FBgn0043783	FBgn0043783	CG32444	0.684783	0.685234	3.77805	0.00298772	0.0236187
FBgn0023215	FBgn0023215	FBgn0023215	Mnt	-0.509933	-0.509951	8.20739	0.00300729	0.0237384
FBgn0033378	FBgn0033378	FBgn0033378	tsu	-0.8334	-0.835857	2.04824	0.00300885	0.0237384
FBgn0053493	FBgn0053493	FBgn0053493	CG33493	-0.702312	-0.703495	2.74636	0.00302824	0.0238646
FBgn0011581	FBgn0011581	FBgn0011581	Ms	-0.762827	-0.763582	3.13986	0.00303085	0.0238646
FBgn0027615	FBgn0027615	FBgn0027615	OXA1L	-0.809048	-0.810505	2.50496	0.00304465	0.0239355
FBgn0001108	FBgn0001108	FBgn0001108	DCTN1-p150	-0.552958	-0.553002	7.04638	0.0030459	0.0239355
FBgn0031604	FBgn0031604	FBgn0031604	Elp3	-0.660786	-0.661322	3.70464	0.00307477	0.0241374
FBgn0023545	FBgn0023545	FBgn0023545	PIG-K	-0.70107	-0.701573	3.8801	0.00307768	0.0241374
FBgn0036857	FBgn0036857	FBgn0036857	Aldh7A1	-0.746953	-0.748552	2.30372	0.00308179	0.0241458
FBgn0039130	FBgn0039130	FBgn0039130	CG5854	-0.643221	-0.643864	3.50722	0.00310612	0.0243123
FBgn0086784	FBgn0086784	FBgn0086784	stmA	-0.561179	-0.5612	7.9305	0.00312453	0.0244323
FBgn0032475	FBgn0032475	FBgn0032475	Sfmbt	-0.500775	-0.500821	6.85965	0.00315609	0.0246548
FBgn0263997	FBgn0263997	FBgn0263997	CG43740	-0.634771	-0.635057	4.63938	0.00316403	0.0246925
FBgn0023172	FBgn0023172	FBgn0023172	RhoGEF2	-0.520422	-0.520429	9.77746	0.00316914	0.0247081
FBgn0037997	FBgn0037997	FBgn0037997	CG14742	0.780878	0.782828	2.59327	0.00318862	0.0248356
FBgn0028992	FBgn0028992	FBgn0028992	sds22	0.721007	0.722035	2.66984	0.00321727	0.0250341
FBgn0039465	FBgn0039465	FBgn0039465	Tsp97E	-0.615106	-0.615136	7.95362	0.00322586	0.0250763
FBgn0039564	FBgn0039564	FBgn0039564	Nep7	-0.705639	-0.706843	3.12791	0.00327175	0.0253955
FBgn0039908	FBgn0039908	FBgn0039908	Asator	-0.505107	-0.505112	10.0767	0.00327333	0.0253955
FBgn0008636	FBgn0008636	FBgn0008636	hbn	-0.935194	-0.93704	2.62146	0.00329211	0.0254735
FBgn0263772	FBgn0263772	FBgn0263772	CG43689	-0.665407	-0.665792	4.37588	0.00329363	0.0254735
FBgn0264272	FBgn0264272	FBgn0264272	mwh	0.689706	0.689757	6.60906	0.00329611	0.0254735
FBgn0033260	FBgn0033260	FBgn0033260	Cul4	-0.579317	-0.579446	5.43299	0.00329802	0.0254735
FBgn0016061	FBgn0016061	FBgn0016061	side	-0.594102	-0.594164	6.61765	0.00329945	0.0254735
FBgn0028554	FBgn0028554	FBgn0028554	x16	-0.618395	-0.618685	4.44761	0.00331346	0.0255481
FBgn0053513	FBgn0053513	FBgn0053513	Nmdar2	-0.589881	-0.589975	5.89164	0.00331555	0.0255481
FBgn0030296	FBgn0030296	FBgn0030296	CG15196	1.35787	1.35819	5.24305	0.00331959	0.0255544
FBgn0264975	FBgn0264975	FBgn0264975	Nrg	-0.544569	-0.544593	7.98984	0.00332923	0.0256038
FBgn0262716	FBgn0262716	FBgn0262716	Arp3	-0.610893	-0.611119	5.16004	0.00335035	0.0257206
FBgn0031453	FBgn0031453	FBgn0031453	Bacc	-0.636737	-0.63677	7.99486	0.00335091	0.0257206
FBgn0085479	FBgn0085479	FBgn0085479	CG34450	-0.684724	-0.684971	4.72377	0.00337048	0.0258253
FBgn0033421	FBgn0033421	FBgn0033421	CG1888	0.572067	0.572306	4.50772	0.00337107	0.0258253
FBgn0036698	FBgn0036698	FBgn0036698	CG7724	0.73597	0.73647	3.44808	0.00337606	0.0258386
FBgn0041171	FBgn0041171	FBgn0041171	ago	-0.534939	-0.534987	6.81962	0.00342979	0.0262245
FBgn0030367	FBgn0030367	FBgn0030367	Cyp311a1	0.692748	0.693134	3.94213	0.00343458	0.0262358
FBgn0031764	FBgn0031764	FBgn0031764	CG9107	-0.969594	-0.973164	2.02393	0.00344646	0.0263012
FBgn0033226	FBgn0033226	FBgn0033226	CG1882	0.69327	0.693309	7.80055	0.00345253	0.0263097
FBgn0029170	FBgn0029170	FBgn0029170	TwdlT	-0.785616	-0.786611	3.05298	0.00345421	0.0263097
FBgn0052113	FBgn0052113	FBgn0052113	Vps13D	-0.498054	-0.498098	6.96933	0.00349309	0.0265804
FBgn0032078	FBgn0032078	FBgn0032078	C1GalTA	0.579029	0.579386	4.1853	0.00350536	0.0266482
FBgn0053202	FBgn0053202	FBgn0053202	dpr11	-0.572703	-0.572831	5.47058	0.0035241	0.0267607
FBgn0264386	FBgn0264386	FBgn0264386	Ca-alpha1T	-0.593879	-0.593888	9.28466	0.00352691	0.0267607
FBgn0029082	FBgn0029082	FBgn0029082	hbs	-0.678906	-0.679277	4.0393	0.0035327	0.0267789
FBgn0264492	FBgn0264492	FBgn0264492	CkIIalpha	-0.644476	-0.644694	5.00344	0.0035375	0.0267897
FBgn0261831	FBgn0261831	FBgn0261831	CG42763	-0.719408	-0.720719	2.49074	0.00354203	0.0267984
FBgn0085488	FBgn0085488	FBgn0085488	CG34459	-1.20948	-1.21205	3.14264	0.00354945	0.026829
FBgn0003517	FBgn0003517	FBgn0003517	sta	0.642752	0.642781	7.73558	0.00355696	0.0268594
FBgn0028694	FBgn0028694	FBgn0028694	Rpn11	-0.693134	-0.693757	3.85414	0.00356363	0.0268594
FBgn0053082	FBgn0053082	FBgn0053082	CG33082	-0.81528	-0.818049	1.9838	0.00356364	0.0268594
FBgn0037317	FBgn0037317	FBgn0037317	CG14667	-0.803541	-0.804886	2.77298	0.00357185	0.0268957
FBgn0037930	FBgn0037930	FBgn0037930	CG14715	0.657771	0.65865	2.82041	0.00358218	0.0269479
FBgn0262714	FBgn0262714	FBgn0262714	Sap130	-0.534487	-0.534555	6.34985	0.00360069	0.0270615
FBgn0036928	FBgn0036928	FBgn0036928	Tom20	-0.692985	-0.69361	3.61837	0.00360724	0.0270805
FBgn0000557	FBgn0000557	FBgn0000557	eEF1alpha2	-0.522821	-0.522835	8.60561	0.00361005	0.0270805
FBgn0037326	FBgn0037326	FBgn0037326	CG14669	-0.667209	-0.66734	5.66032	0.00364327	0.0273039
FBgn0052512	FBgn0052512	FBgn0052512	CG32512	0.637648	0.63796	4.60188	0.00364893	0.0273091
FBgn0028993	FBgn0028993	FBgn0028993	scro	-0.695742	-0.695977	4.78083	0.00365372	0.0273091
FBgn0031897	FBgn0031897	FBgn0031897	CG13784	-0.563381	-0.563405	8.09581	0.00365431	0.0273091
FBgn0030723	FBgn0030723	FBgn0030723	dpr18	-0.617818	-0.618266	3.69984	0.00366426	0.0273578
FBgn0033994	FBgn0033994	FBgn0033994	CG7544	-0.81119	-0.812658	3.14649	0.00367142	0.0273722
FBgn0038542	FBgn0038542	FBgn0038542	TyrR	-0.706679	-0.707445	3.24463	0.00367311	0.0273722
FBgn0040354	FBgn0040354	FBgn0040354	CG14418	0.6723	0.673077	3.02173	0.00369498	0.0275094
FBgn0024963	FBgn0024963	FBgn0024963	GluClalpha	-0.700192	-0.700231	7.29131	0.00370266	0.0275216
FBgn0010241	FBgn0010241	FBgn0010241	Mdr50	0.666335	0.667029	3.20335	0.00370356	0.0275216
FBgn0025879	FBgn0025879	FBgn0025879	Timp	0.587879	0.58799	5.65747	0.0037137	0.0275711
FBgn0027562	FBgn0027562	FBgn0027562	CG10345	0.634237	0.634317	5.78035	0.00374654	0.0277797
FBgn0036451	FBgn0036451	FBgn0036451	CG9425	-0.524781	-0.524796	8.53384	0.00374881	0.0277797
FBgn0036575	FBgn0036575	FBgn0036575	CG5157	1.28992	1.29169	2.84854	0.00376967	0.0279082
FBgn0026317	FBgn0026317	FBgn0026317	Tsc1	-0.590822	-0.590942	5.81309	0.00377454	0.0279182
FBgn0031571	FBgn0031571	FBgn0031571	bark	-0.596964	-0.597033	6.81262	0.00379003	0.0280066
FBgn0027932	FBgn0027932	FBgn0027932	Akap200	-0.646116	-0.646195	7.57547	0.00380072	0.0280595
FBgn0035603	FBgn0035603	FBgn0035603	Pfdn4	-0.695671	-0.696733	2.89356	0.00380922	0.0280961
FBgn0263133	FBgn0263133	FBgn0263133	mEFG1	0.716577	0.716951	4.35133	0.0038314	0.0282322
FBgn0035010	FBgn0035010	FBgn0035010	CG13579	-0.676663	-0.67706	4.0976	0.00383479	0.0282322
FBgn0051755	FBgn0051755	FBgn0051755	SoYb	0.644524	0.645355	3.21345	0.00383953	0.0282408
FBgn0004359	FBgn0004359	FBgn0004359	T48	0.561493	0.561642	4.90274	0.00386826	0.0284152
FBgn0014029	FBgn0014029	FBgn0014029	2021-09-02	-0.62479	-0.625245	4.26149	0.00387041	0.0284152
FBgn0033998	FBgn0033998	FBgn0033998	row	-0.551104	-0.551201	5.89526	0.00389619	0.0285589
FBgn0086370	FBgn0086370	FBgn0086370	sra	0.751679	0.751773	6.22711	0.00389718	0.0285589
FBgn0031060	FBgn0031060	FBgn0031060	CG14231	0.688753	0.689907	2.76172	0.00391977	0.0286728
FBgn0032336	FBgn0032336	FBgn0032336	AstC	-0.777369	-0.778698	2.27335	0.00391995	0.0286728
FBgn0035318	FBgn0035318	FBgn0035318	CG9018	-0.668767	-0.669504	3.5122	0.00392731	0.0286919
FBgn0033308	FBgn0033308	FBgn0033308	CG8736	1.11389	1.11488	2.94988	0.0039298	0.0286919
FBgn0038893	FBgn0038893	FBgn0038893	Archease	-0.71806	-0.718983	3.5702	0.00393875	0.0287308
FBgn0031835	FBgn0031835	FBgn0031835	CG11319	-0.608858	-0.608896	7.34115	0.00397102	0.0289395
FBgn0028645	FBgn0028645	FBgn0028645	beat-Ib	-0.674763	-0.675235	3.64554	0.00398524	0.0290165
FBgn0032805	FBgn0032805	FBgn0032805	CG10337	-0.938519	-0.94202	3.70987	0.00399886	0.0290531
FBgn0036502	FBgn0036502	FBgn0036502	CG7841	0.738923	0.739439	3.70229	0.00399917	0.0290531
FBgn0036448	FBgn0036448	FBgn0036448	mop	-0.578657	-0.578682	7.99684	0.00400126	0.0290531
FBgn0011762	FBgn0011762	FBgn0011762	DNApol-alpha50	0.831407	0.832198	3.05603	0.00405075	0.0293855
FBgn0030183	FBgn0030183	FBgn0030183	CG15309	0.58983	0.59008	4.5694	0.00408063	0.0295711
FBgn0040273	FBgn0040273	FBgn0040273	Spt5	-0.55117	-0.551252	6.03851	0.00408379	0.0295711
FBgn0263005	FBgn0263005	FBgn0263005	CG43313	0.656958	0.65734	3.78895	0.00411337	0.0297581
FBgn0027085	FBgn0027085	FBgn0027085	LeuRS-m	-0.585483	-0.585686	4.80912	0.00413569	0.0298923
FBgn0262743	FBgn0262743	FBgn0262743	Fs(2)Ket	-0.534423	-0.534439	8.47772	0.00415067	0.0299733
FBgn0003748	FBgn0003748	FBgn0003748	Treh	-0.605005	-0.605016	8.8163	0.00417704	0.0301236
FBgn0027515	FBgn0027515	FBgn0027515	CG7115	-0.582576	-0.582741	5.45687	0.00417908	0.0301236
FBgn0036433	FBgn0036433	FBgn0036433	CG9628	0.632214	0.632408	4.86412	0.00419987	0.0302459
FBgn0002707	FBgn0002707	FBgn0002707	mei-9	-0.682372	-0.682957	3.89948	0.00421004	0.0302917
FBgn0015268	FBgn0015268	FBgn0015268	Nap1	-0.616076	-0.616229	5.6562	0.00424278	0.0304822
FBgn0038878	FBgn0038878	FBgn0038878	CG3301	0.634213	0.634369	4.97847	0.0042442	0.0304822
FBgn0030163	FBgn0030163	FBgn0030163	CG1791	0.855019	0.856824	2.03275	0.00427341	0.0306641
FBgn0040259	FBgn0040259	FBgn0040259	Ugt302C1	0.608198	0.608542	3.92529	0.00428339	0.0307079
FBgn0037328	FBgn0037328	FBgn0037328	RpL35A	0.612382	0.612437	6.7283	0.0043106	0.0308673
FBgn0015774	FBgn0015774	FBgn0015774	NetB	-0.624266	-0.624365	5.73353	0.00431523	0.0308673
FBgn0035592	FBgn0035592	FBgn0035592	CG10674	-0.829937	-0.832139	2.25135	0.00431989	0.0308673
FBgn0263397	FBgn0263397	FBgn0263397	Ih	-0.540876	-0.540893	8.11788	0.00432283	0.0308673
FBgn0026630	FBgn0026630	FBgn0026630	nes	-0.574825	-0.575066	4.84674	0.00432508	0.0308673
FBgn0003360	FBgn0003360	FBgn0003360	sesB	0.582453	0.58247	8.08662	0.0043445	0.030978
FBgn0046704	FBgn0046704	FBgn0046704	Liprin-alpha	-0.505574	-0.505597	7.88232	0.00436023	0.0310622
FBgn0264855	FBgn0264855	FBgn0264855	AP-2alpha	-0.500265	-0.500291	7.56579	0.00438882	0.0312191
FBgn0033883	FBgn0033883	FBgn0033883	CG16935	-0.634039	-0.63458	3.4744	0.00439013	0.0312191
FBgn0040298	FBgn0040298	FBgn0040298	Myt1	-0.720893	-0.722228	2.55246	0.00442642	0.031449
FBgn0052183	FBgn0052183	FBgn0052183	Ccn	-0.603367	-0.603602	4.62813	0.0044373	0.0314926
FBgn0052250	FBgn0052250	FBgn0052250	PMP34	-0.670637	-0.671436	3.21587	0.0044412	0.0314926
FBgn0039691	FBgn0039691	FBgn0039691	IntS11	-0.643261	-0.643997	3.4197	0.00444448	0.0314926
FBgn0050051	FBgn0050051	FBgn0050051	Tmem18	-0.782453	-0.784999	1.78147	0.00445368	0.0315297
FBgn0031631	FBgn0031631	FBgn0031631	CG3225	-0.778098	-0.77892	3.69346	0.00447944	0.0316837
FBgn0001296	FBgn0001296	FBgn0001296	kar	0.543499	0.543548	6.80584	0.00448954	0.0317269
FBgn0000206	FBgn0000206	FBgn0000206	boss	-0.644215	-0.64426	7.26834	0.00449544	0.0317403
FBgn0052580	FBgn0052580	FBgn0052580	Muc14A	-0.70922	-0.709653	4.89551	0.00450278	0.0317638
FBgn0039120	FBgn0039120	FBgn0039120	Nup98-96	-0.579453	-0.579503	7.12913	0.00451756	0.0318398
FBgn0030655	FBgn0030655	FBgn0030655	CG9213	-0.766757	-0.76802	2.91771	0.00452403	0.0318571
FBgn0037546	FBgn0037546	FBgn0037546	mAChR-B	-0.639181	-0.639632	3.90439	0.00453041	0.0318736
FBgn0034307	FBgn0034307	FBgn0034307	CG10914	-0.678352	-0.679394	2.92409	0.00453621	0.0318862
FBgn0033710	FBgn0033710	FBgn0033710	CG17739	0.51361	0.513624	8.33351	0.00454923	0.0319494
FBgn0031287	FBgn0031287	FBgn0031287	CG4291	-0.669012	-0.669707	3.31245	0.00457106	0.0320743
FBgn0051642	FBgn0051642	FBgn0051642	CG31642	-0.628338	-0.628416	6.17165	0.00457639	0.0320833
FBgn0003295	FBgn0003295	FBgn0003295	ru	-0.86303	-0.863303	4.82611	0.00458076	0.0320855
FBgn0037109	FBgn0037109	FBgn0037109	MED1	-0.529248	-0.529321	6.32781	0.00458952	0.0320941
FBgn0283651	FBgn0283651	FBgn0283651	CG46301	-0.663545	-0.664131	3.45783	0.00459008	0.0320941
FBgn0262169	FBgn0262169	FBgn0262169	magu	0.546732	0.546848	5.1219	0.00460105	0.0321425
FBgn0051633	FBgn0051633	FBgn0051633	CG31633	-0.727459	-0.72921	2.42286	0.00460879	0.0321682
FBgn0041097	FBgn0041097	FBgn0041097	robo3	-0.537331	-0.53748	5.09685	0.0046286	0.0322499
FBgn0086778	FBgn0086778	FBgn0086778	nAChRalpha7	-0.596921	-0.596972	6.72237	0.00462862	0.0322499
FBgn0001977	FBgn0001977	FBgn0001977	CIAPIN1	-0.57121	-0.571338	5.47288	0.00464368	0.0323059
FBgn0010389	FBgn0010389	FBgn0010389	htl	-0.654249	-0.65462	4.26555	0.00464782	0.0323059
FBgn0034198	FBgn0034198	FBgn0034198	CG11400	-0.671323	-0.672049	3.17035	0.00464889	0.0323059
FBgn0033259	FBgn0033259	FBgn0033259	Tmem63	-0.591808	-0.591844	7.27592	0.00467863	0.0324608
FBgn0039427	FBgn0039427	FBgn0039427	CG5447	0.540317	0.540483	4.91359	0.00468034	0.0324608
FBgn0032883	FBgn0032883	FBgn0032883	Rhau	-0.538426	-0.538619	4.80307	0.00468346	0.0324608
FBgn0033741	FBgn0033741	FBgn0033741	CG8545	-0.729493	-0.730291	3.84125	0.00469279	0.0324971
FBgn0031265	FBgn0031265	FBgn0031265	CG2794	-0.614692	-0.615283	3.82207	0.00470096	0.0325061
FBgn0013323	FBgn0013323	FBgn0013323	Ptth	0.749864	0.75203	2.50744	0.00470406	0.0325061
FBgn0032691	FBgn0032691	FBgn0032691	Atac2	-0.782933	-0.78459	2.60882	0.00470639	0.0325061
FBgn0038551	FBgn0038551	FBgn0038551	Odj	-0.696363	-0.697062	3.49463	0.00471056	0.0325065
FBgn0030566	FBgn0030566	FBgn0030566	betaNACtes4	0.705172	0.706523	2.3804	0.00471983	0.0325422
FBgn0058470	FBgn0058470	FBgn0058470	CG40470	-0.716952	-0.717556	3.49899	0.00473522	0.0326199
FBgn0035722	FBgn0035722	FBgn0035722	CG10075	-0.753519	-0.755276	2.28495	0.00474649	0.0326692
FBgn0004436	FBgn0004436	FBgn0004436	Ubc6	0.566622	0.566693	6.38231	0.00477139	0.0328121
FBgn0030189	FBgn0030189	FBgn0030189	CG2909	-0.681032	-0.681728	3.79578	0.00479318	0.0329332
FBgn0020616	FBgn0020616	FBgn0020616	SA	-0.547624	-0.547807	4.97767	0.00479731	0.0329332
FBgn0262855	FBgn0262855	FBgn0262855	CG43219	0.646228	0.646892	2.93733	0.00480891	0.0329843
FBgn0027561	FBgn0027561	FBgn0027561	CG18659	-0.657878	-0.657898	8.65997	0.00481525	0.0329992
FBgn0033897	FBgn0033897	FBgn0033897	Rcd1	-0.554167	-0.55424	6.54587	0.00482116	0.0330112
FBgn0022786	FBgn0022786	FBgn0022786	Hira	-0.691921	-0.692524	3.57519	0.00482678	0.0330212
FBgn0037535	FBgn0037535	FBgn0037535	PIG-H	0.725493	0.726599	2.88507	0.00483823	0.033071
FBgn0033121	FBgn0033121	FBgn0033121	Cyp6u1	-0.590176	-0.590614	4.0139	0.00487057	0.0332634
FBgn0285892	FBgn0285892	FBgn0285892	tea	-0.558965	-0.559127	5.218	0.00488159	0.0332818
FBgn0036262	FBgn0036262	FBgn0036262	CG6910	-0.697391	-0.697496	5.96369	0.00488167	0.0332818
FBgn0027504	FBgn0027504	FBgn0027504	CG8878	-0.539378	-0.539424	6.99156	0.0048995	0.0333558
FBgn0030915	FBgn0030915	FBgn0030915	CG6179	0.755324	0.755824	3.57509	0.00490093	0.0333558
FBgn0031951	FBgn0031951	FBgn0031951	r2d2	0.709566	0.710373	3.15842	0.00492736	0.0335069
FBgn0259984	FBgn0259984	FBgn0259984	kuz	-0.565643	-0.565665	8.00461	0.00493745	0.0335468
FBgn0050169	FBgn0050169	FBgn0050169	Brca2	-0.611736	-0.612194	4.01397	0.00494283	0.0335546
FBgn0259677	FBgn0259677	FBgn0259677	CG42346	-0.579188	-0.579385	4.82094	0.00494879	0.0335594
FBgn0031359	FBgn0031359	FBgn0031359	Rim2	-0.803504	-0.803575	7.2562	0.004952	0.0335594
FBgn0050185	FBgn0050185	FBgn0050185	AIMP3	-0.671175	-0.672258	2.77325	0.00498739	0.0337485
FBgn0036742	FBgn0036742	FBgn0036742	CG7497	0.735886	0.736244	3.77293	0.00499165	0.0337485
FBgn0063649	FBgn0063649	FBgn0063649	CG6006	-0.610486	-0.610773	4.37054	0.00499318	0.0337485
FBgn0037465	FBgn0037465	FBgn0037465	CG1105	-0.604674	-0.604859	5.51749	0.00499694	0.0337485
FBgn0010583	FBgn0010583	FBgn0010583	dock	-0.667785	-0.667822	7.86214	0.005014	0.0338349
FBgn0028644	FBgn0028644	FBgn0028644	beat-Ic	-0.659953	-0.66034	4.07313	0.0050249	0.0338562
FBgn0002626	FBgn0002626	FBgn0002626	RpL32	0.635391	0.635457	6.5677	0.0050257	0.0338562
FBgn0035713	FBgn0035713	FBgn0035713	velo	-0.496075	-0.496104	7.58148	0.00504694	0.0339704
FBgn0000083	FBgn0000083	FBgn0000083	AnxB9	-0.796982	-0.797019	7.88332	0.00506031	0.0340232
FBgn0261984	FBgn0261984	FBgn0261984	Ire1	0.836937	0.836969	7.88201	0.00506335	0.0340232
FBgn0033669	FBgn0033669	FBgn0033669	PI31	0.637431	0.63766	4.78127	0.00507764	0.0340903
FBgn0030806	FBgn0030806	FBgn0030806	CG13001	-0.878518	-0.880279	2.4849	0.00509048	0.0341476
FBgn0040099	FBgn0040099	FBgn0040099	lectin-28C	-0.65822	-0.658697	3.80462	0.00511235	0.0342653
FBgn0034175	FBgn0034175	FBgn0034175	ste24b	-0.742992	-0.745049	2.287	0.00516179	0.0345674
FBgn0038788	FBgn0038788	FBgn0038788	Sirt2	-0.549919	-0.55019	4.59792	0.00521936	0.0349234
FBgn0025684	FBgn0025684	FBgn0025684	MFS18	-0.681724	-0.683024	2.52266	0.00532084	0.0355725
FBgn0086365	FBgn0086365	FBgn0086365	Orct2	-0.648398	-0.648583	5.16893	0.00535621	0.0357392
FBgn0085420	FBgn0085420	FBgn0085420	DIP-delta	-0.650242	-0.650706	3.85801	0.00535623	0.0357392
FBgn0028737	FBgn0028737	FBgn0028737	eEF1beta	0.64382	0.643928	5.92052	0.0053593	0.0357392
FBgn0051773	FBgn0051773	FBgn0051773	CG31773	-0.885913	-0.888016	2.06721	0.00538937	0.0359095
FBgn0029158	FBgn0029158	FBgn0029158	Las	-0.713994	-0.714398	4.19088	0.00540608	0.0359498
FBgn0034381	FBgn0034381	FBgn0034381	List	-0.623122	-0.623417	4.20699	0.00540756	0.0359498
FBgn0034187	FBgn0034187	FBgn0034187	CG6967	-0.726164	-0.727081	2.85851	0.00540902	0.0359498
FBgn0083950	FBgn0083950	FBgn0083950	side-VI	-0.576095	-0.576155	6.48629	0.00542728	0.0360297
FBgn0035398	FBgn0035398	FBgn0035398	Cht7	0.679817	0.680564	2.79806	0.00543013	0.0360297
FBgn0037248	FBgn0037248	FBgn0037248	srl	-0.741872	-0.742291	4.39725	0.00544706	0.0360891
FBgn0031820	FBgn0031820	FBgn0031820	Daxx	-0.49712	-0.497178	6.64609	0.00544818	0.0360891
FBgn0265512	FBgn0265512	FBgn0265512	mlt	-0.547976	-0.547998	7.97741	0.00545804	0.0361141
FBgn0033375	FBgn0033375	FBgn0033375	CG8078	-0.590596	-0.591031	3.7823	0.00546107	0.0361141
FBgn0063923	FBgn0063923	FBgn0063923	Kaz1-ORFB	-0.656088	-0.6569	3.16527	0.00547203	0.0361564
FBgn0032587	FBgn0032587	FBgn0032587	CG5953	0.853673	0.853768	6.77606	0.00550585	0.0363496
FBgn0037672	FBgn0037672	FBgn0037672	sage	0.677022	0.677123	5.90667	0.00553824	0.036533
FBgn0028936	FBgn0028936	FBgn0028936	NimB5	-0.701323	-0.702837	2.22175	0.00556581	0.0366844
FBgn0021872	FBgn0021872	FBgn0021872	Xbp1	0.617204	0.617224	8.31049	0.00559435	0.0368419
FBgn0032924	FBgn0032924	FBgn0032924	Nbr	-0.598136	-0.598539	4.06421	0.0056226	0.0369972
FBgn0036726	FBgn0036726	FBgn0036726	QIL1	0.639295	0.639599	3.91423	0.00567185	0.0372708
FBgn0028978	FBgn0028978	FBgn0028978	trbl	-0.996879	-0.997056	6.44327	0.00567358	0.0372708
FBgn0032101	FBgn0032101	FBgn0032101	CG9586	-0.663691	-0.664432	3.5443	0.00568164	0.0372928
FBgn0260439	FBgn0260439	FBgn0260439	Pp2A-29B	-0.509155	-0.509209	6.61593	0.00569857	0.037373
FBgn0020300	FBgn0020300	FBgn0020300	geko	-0.755173	-0.757213	1.69314	0.00572365	0.0375065
FBgn0004868	FBgn0004868	FBgn0004868	Gdi	-0.580602	-0.580701	5.94779	0.00572883	0.0375094
FBgn0035851	FBgn0035851	FBgn0035851	MED24	-0.525761	-0.525919	5.09952	0.00575225	0.0376199
FBgn0029688	FBgn0029688	FBgn0029688	lva	-0.504505	-0.504522	8.38106	0.00575672	0.0376199
FBgn0052177	FBgn0052177	FBgn0052177	Ndfip	0.525011	0.525107	5.6374	0.00575993	0.0376199
FBgn0284084	FBgn0284084	FBgn0284084	wg	-0.74544	-0.746756	2.71684	0.00577271	0.0376432
FBgn0030347	FBgn0030347	FBgn0030347	CG15739	0.651269	0.65197	3.26594	0.005773	0.0376432
FBgn0030873	FBgn0030873	FBgn0030873	CG15814	-0.539036	-0.539208	4.94899	0.00578757	0.0376967
FBgn0003390	FBgn0003390	FBgn0003390	shf	0.651531	0.652245	3.35449	0.00579475	0.0376967
FBgn0037475	FBgn0037475	FBgn0037475	Fer1	-0.72436	-0.725906	2.07675	0.00579548	0.0376967
FBgn0000229	FBgn0000229	FBgn0000229	bsk	-0.567807	-0.567911	5.86118	0.0058237	0.0378493
FBgn0037206	FBgn0037206	FBgn0037206	CG12768	-0.670147	-0.670929	3.13552	0.00582877	0.0378512
FBgn0029503	FBgn0029503	FBgn0029503	CHORD	0.783023	0.784181	2.85179	0.00584094	0.0378575
FBgn0262117	FBgn0262117	FBgn0262117	IntS3	-0.487154	-0.487187	7.28087	0.00584133	0.0378575
FBgn0032731	FBgn0032731	FBgn0032731	Swip-1	-0.863714	-0.864012	5.0677	0.00584407	0.0378575
FBgn0003977	FBgn0003977	FBgn0003977	vir	-0.552865	-0.552953	6.10806	0.00585123	0.037873
FBgn0039644	FBgn0039644	FBgn0039644	rdog	-0.583244	-0.583363	6.10688	0.00586399	0.0379246
FBgn0011455	FBgn0011455	FBgn0011455	ND-SGDH	-0.616372	-0.616655	4.4883	0.00588706	0.0380398
FBgn0032494	FBgn0032494	FBgn0032494	CG5945	0.56061	0.560775	4.72418	0.00589139	0.0380398
FBgn0260793	FBgn0260793	FBgn0260793	2mit	-0.540532	-0.540632	5.6294	0.00591166	0.0381396
FBgn0035110	FBgn0035110	FBgn0035110	thoc7	-0.700555	-0.701737	2.87189	0.00591844	0.0381523
FBgn0000551	FBgn0000551	FBgn0000551	Edg78E	0.883412	0.884714	2.69367	0.00593558	0.0382317
FBgn0010315	FBgn0010315	FBgn0010315	CycD	0.652707	0.653539	3.04306	0.00599039	0.0385479
FBgn0032032	FBgn0032032	FBgn0032032	CG17294	0.622738	0.623209	3.65318	0.0059977	0.0385479
FBgn0035146	FBgn0035146	FBgn0035146	CG13893	-0.747887	-0.748002	6.00605	0.00599926	0.0385479
FBgn0052855	FBgn0052855	FBgn0052855	CG32855	0.56806	0.568193	5.26511	0.00600985	0.0385847
FBgn0002917	FBgn0002917	FBgn0002917	na	-0.522915	-0.522947	7.46209	0.00606706	0.0389121
FBgn0026872	FBgn0026872	FBgn0026872	CG14777	0.582366	0.582662	4.2073	0.00607416	0.0389121
FBgn0085408	FBgn0085408	FBgn0085408	Shrm	0.702839	0.702854	8.95499	0.00607557	0.0389121
FBgn0036843	FBgn0036843	FBgn0036843	Sfxn2	0.633765	0.63426	3.91283	0.00608214	0.0389227
FBgn0037171	FBgn0037171	FBgn0037171	CG14459	-0.667416	-0.667579	5.29446	0.00609884	0.0389981
FBgn0036260	FBgn0036260	FBgn0036260	Rh7	-0.611521	-0.611705	4.88134	0.00610672	0.0390171
FBgn0037659	FBgn0037659	FBgn0037659	Kdm2	-0.494457	-0.49449	7.36166	0.00611169	0.0390174
FBgn0034058	FBgn0034058	FBgn0034058	Pex11	-0.870616	-0.872634	2.66455	0.00613764	0.0391516
FBgn0058006	FBgn0058006	FBgn0058006	CG40006	0.562012	0.562078	5.82588	0.00615331	0.0392199
FBgn0032198	FBgn0032198	FBgn0032198	eEF1delta	-0.619454	-0.619958	3.96258	0.00619874	0.0394659
FBgn0026323	FBgn0026323	FBgn0026323	Tak1	-0.477443	-0.477494	6.55997	0.00620186	0.0394659
FBgn0016698	FBgn0016698	FBgn0016698	Ptpa	-0.685409	-0.686581	2.79323	0.00621027	0.0394878
FBgn0051861	FBgn0051861	FBgn0051861	CG31861	-1.11648	-1.11971	2.72196	0.0062244	0.0395459
FBgn0286784	FBgn0286784	FBgn0286784	TER94	-0.532054	-0.53211	6.92106	0.00625112	0.0396673
FBgn0037525	FBgn0037525	FBgn0037525	CG17816	0.523705	0.523709	10.2886	0.00625352	0.0396673
FBgn0010607	FBgn0010607	FBgn0010607	l(2)05714	0.796435	0.798435	1.88477	0.00626347	0.0396987
FBgn0023527	FBgn0023527	FBgn0023527	CG3071	-0.65117	-0.6522	2.93538	0.00627219	0.0397222
FBgn0032859	FBgn0032859	FBgn0032859	Arpc2	-0.516879	-0.517007	5.34657	0.00628789	0.0397898
FBgn0016696	FBgn0016696	FBgn0016696	Pitslre	-0.510241	-0.510253	8.8999	0.00631305	0.0399172
FBgn0051140	FBgn0051140	FBgn0051140	CG31140	-0.542438	-0.542445	9.19541	0.00636108	0.0401888
FBgn0038065	FBgn0038065	FBgn0038065	Snx3	-0.539963	-0.540127	5.33604	0.00638543	0.0403106
FBgn0023174	FBgn0023174	FBgn0023174	Prosbeta2	-0.640236	-0.640778	3.8215	0.00640994	0.0404331
FBgn0010348	FBgn0010348	FBgn0010348	Arf79F	-0.530931	-0.530974	7.1189	0.00644965	0.0406513
FBgn0033339	FBgn0033339	FBgn0033339	Sec31	-0.489747	-0.48979	6.86155	0.00646436	0.040704
FBgn0039559	FBgn0039559	FBgn0039559	NSD	-0.535182	-0.53532	5.33969	0.00646828	0.040704
FBgn0033973	FBgn0033973	FBgn0033973	HPS1	-0.64261	-0.643583	2.72997	0.00648224	0.0407595
FBgn0026369	FBgn0026369	FBgn0026369	Sara	-0.5063	-0.506347	6.85303	0.00649942	0.0408351
FBgn0033104	FBgn0033104	FBgn0033104	CG15237	0.772573	0.775011	2.06229	0.00652385	0.0409561
FBgn0011207	FBgn0011207	FBgn0011207	pelo	-0.54381	-0.544006	5.02014	0.00653483	0.0409926
FBgn0032596	FBgn0032596	FBgn0032596	Prosbeta4	-0.662098	-0.663165	2.98339	0.00655085	0.0410606
FBgn0038494	FBgn0038494	FBgn0038494	beat-IIb	-0.641859	-0.642452	3.53081	0.00657157	0.041147
FBgn0020440	FBgn0020440	FBgn0020440	Fak	-0.487166	-0.487211	6.83922	0.00658327	0.041147
FBgn0033403	FBgn0033403	FBgn0033403	CG13739	-0.622329	-0.622401	6.42795	0.00659543	0.041147
FBgn0034392	FBgn0034392	FBgn0034392	MFS15	-0.728583	-0.729625	3.19577	0.00659661	0.041147
FBgn0030638	FBgn0030638	FBgn0030638	CG11655	0.661849	0.66245	3.32838	0.00659898	0.041147
FBgn0036018	FBgn0036018	FBgn0036018	CG3335	-0.671402	-0.672453	2.97079	0.00659987	0.041147
FBgn0263236	FBgn0263236	FBgn0263236	SP1029	-0.632	-0.632373	4.32958	0.00660095	0.041147
FBgn0040339	FBgn0040339	FBgn0040339	MED22	0.608884	0.609303	3.4703	0.00660634	0.0411482
FBgn0001341	FBgn0001341	FBgn0001341	Mybbp1A	-0.63679	-0.637516	3.22559	0.00661931	0.0411966
FBgn0040324	FBgn0040324	FBgn0040324	Ephrin	0.508964	0.509002	6.88786	0.00667718	0.0415242
FBgn0029508	FBgn0029508	FBgn0029508	Tsp42Ea	0.554607	0.554955	3.76887	0.00668303	0.041528
FBgn0051665	FBgn0051665	FBgn0051665	wry	-0.526179	-0.526231	6.60671	0.00675453	0.0419394
FBgn0035429	FBgn0035429	FBgn0035429	CG12017	-0.997444	-0.999044	3.38795	0.00675995	0.0419403
FBgn0039016	FBgn0039016	FBgn0039016	Dcr-1	-0.492117	-0.492233	5.54478	0.00676987	0.041969
FBgn0035140	FBgn0035140	FBgn0035140	BORCS6	-0.687516	-0.68895	2.54071	0.00678289	0.0420168
FBgn0024360	FBgn0024360	FBgn0024360	MTPAP	-0.60757	-0.608078	3.82432	0.00680822	0.0421408
FBgn0001321	FBgn0001321	FBgn0001321	knk	0.875415	0.875602	5.27184	0.00690865	0.0427291
FBgn0039430	FBgn0039430	FBgn0039430	CG5455	-0.618274	-0.618282	9.38289	0.00692799	0.0428153
FBgn0261278	FBgn0261278	FBgn0261278	grp	-0.619858	-0.620099	4.83902	0.00695534	0.0429285
FBgn0023514	FBgn0023514	FBgn0023514	CG14805	0.666966	0.667342	4.12728	0.00695714	0.0429285
FBgn0022069	FBgn0022069	FBgn0022069	Nnp-1	-0.669501	-0.670421	2.90337	0.00700443	0.0431867
FBgn0030913	FBgn0030913	FBgn0030913	CG6123	-0.540705	-0.540885	4.76486	0.00702221	0.0432627
FBgn0038610	FBgn0038610	FBgn0038610	CG7675	0.57993	0.58025	4.15892	0.00704702	0.0433819
FBgn0033566	FBgn0033566	FBgn0033566	CG18004	-0.739532	-0.741592	1.81015	0.00706623	0.0434663
FBgn0005664	FBgn0005664	FBgn0005664	Crys	0.597159	0.597193	6.99356	0.00713391	0.0438486
FBgn0259876	FBgn0259876	FBgn0259876	Cap-G	-0.587688	-0.588043	4.37977	0.00716042	0.0439598
FBgn0051109	FBgn0051109	FBgn0051109	CG31109	-0.711039	-0.712472	2.72207	0.00716308	0.0439598
FBgn0000036	FBgn0000036	FBgn0000036	nAChRalpha1	-0.562623	-0.562686	6.39067	0.00718437	0.0440564
FBgn0004864	FBgn0004864	FBgn0004864	hop	-0.517247	-0.517325	6.00892	0.0072426	0.0443791
FBgn0004839	FBgn0004839	FBgn0004839	otk	-0.662968	-0.663809	3.11319	0.00725028	0.0443918
FBgn0011260	FBgn0011260	FBgn0011260	Sema2a	-0.687428	-0.687724	4.30674	0.00726498	0.0444175
FBgn0034527	FBgn0034527	FBgn0034527	CG9945	-0.580468	-0.580673	5.03528	0.00726567	0.0444175
FBgn0286070	FBgn0286070	FBgn0286070	cnk	-0.563335	-0.563457	5.6024	0.00728969	0.04453
FBgn0045761	FBgn0045761	FBgn0045761	CHKov1	0.643485	0.643974	3.52081	0.0073152	0.0446514
FBgn0264750	FBgn0264750	FBgn0264750	CG44008	-0.60845	-0.608616	5.02492	0.00732212	0.0446593
FBgn0005533	FBgn0005533	FBgn0005533	RpS17	0.616666	0.616751	6.06389	0.00733237	0.0446875
FBgn0021796	FBgn0021796	FBgn0021796	Tor	-0.521849	-0.521893	6.96405	0.00736546	0.0448546
FBgn0037060	FBgn0037060	FBgn0037060	CG10508	-0.584807	-0.584957	5.17622	0.00739851	0.0450213
FBgn0027495	FBgn0027495	FBgn0027495	Smyd4-4	-0.583085	-0.583469	4.13472	0.00743455	0.0451963
FBgn0061469	FBgn0061469	FBgn0061469	Ube3a	-0.496207	-0.496285	6.12732	0.00743866	0.0451963
FBgn0053531	FBgn0053531	FBgn0053531	Ddr	-0.60461	-0.604857	4.62291	0.00744504	0.0452004
FBgn0004687	FBgn0004687	FBgn0004687	Mlc-c	0.583956	0.584024	6.53351	0.00748218	0.0453737
FBgn0034611	FBgn0034611	FBgn0034611	MFS16	-0.573254	-0.573614	4.22943	0.00748977	0.0453737
FBgn0035035	FBgn0035035	FBgn0035035	Samtor	-0.830257	-0.833866	1.75012	0.00749074	0.0453737
FBgn0001987	FBgn0001987	FBgn0001987	Gli	0.613786	0.61391	5.78505	0.00750583	0.0453982
FBgn0036500	FBgn0036500	FBgn0036500	CG7275	-0.6795	-0.680759	2.59122	0.00750625	0.0453982
FBgn0050349	FBgn0050349	FBgn0050349	CG30349	-0.598533	-0.599066	3.83318	0.00751865	0.0454386
FBgn0003882	FBgn0003882	FBgn0003882	tub	0.636611	0.636947	4.17061	0.00754163	0.0455427
FBgn0015797	FBgn0015797	FBgn0015797	Rab6	0.492365	0.492497	5.246	0.00755927	0.0456145
FBgn0036985	FBgn0036985	FBgn0036985	zye	-0.673991	-0.674616	3.48246	0.00757444	0.0456713
FBgn0267350	FBgn0267350	FBgn0267350	PI4KIIIalpha	-0.490043	-0.490054	8.66151	0.00761936	0.0459072
FBgn0038262	FBgn0038262	FBgn0038262	CG14857	1.22975	1.23018	4.2045	0.00770436	0.0463629
FBgn0000352	FBgn0000352	FBgn0000352	cos	-0.519729	-0.519863	5.29618	0.00770668	0.0463629
FBgn0041186	FBgn0041186	FBgn0041186	Slbp	0.770652	0.77171	2.93631	0.0077162	0.046385
FBgn0010194	FBgn0010194	FBgn0010194	Wnt5	0.562906	0.563308	3.90842	0.00774978	0.0465515
FBgn0035501	FBgn0035501	FBgn0035501	CG1299	0.617627	0.617781	4.85625	0.00777859	0.0466892
FBgn0261444	FBgn0261444	FBgn0261444	CG3638	-0.453947	-0.453959	8.64677	0.00780395	0.0467879
FBgn0036340	FBgn0036340	FBgn0036340	SRm160	-0.554579	-0.554653	6.38439	0.00780684	0.0467879
FBgn0053180	FBgn0053180	FBgn0053180	Ranbp16	-0.503394	-0.503427	6.92724	0.00787908	0.0471852
FBgn0029834	FBgn0029834	FBgn0029834	CG5937	0.483381	0.48339	8.82321	0.00788958	0.0472124
FBgn0003460	FBgn0003460	FBgn0003460	so	-0.490392	-0.490435	6.96151	0.00791148	0.0472886
FBgn0037435	FBgn0037435	FBgn0037435	CG18048	-0.823648	-0.826528	2.13418	0.00791811	0.0472886
FBgn0052100	FBgn0052100	FBgn0052100	CG32100	-0.625765	-0.626549	3.31552	0.0079202	0.0472886
FBgn0032512	FBgn0032512	FBgn0032512	Bdp1	1.07986	1.08011	5.3866	0.00793104	0.0473177
FBgn0250910	FBgn0250910	FBgn0250910	Octbeta3R	-0.587443	-0.587578	5.36091	0.00794736	0.0473794
FBgn0037622	FBgn0037622	FBgn0037622	CG8202	-0.561735	-0.561978	4.69209	0.00796609	0.0474422
FBgn0039031	FBgn0039031	FBgn0039031	Gbp3	0.622167	0.622718	3.17421	0.00796985	0.0474422
FBgn0064227	FBgn0064227	FBgn0064227	Rdh	0.648194	0.648457	4.52588	0.00802147	0.0476795
FBgn0003353	FBgn0003353	FBgn0003353	sei	-0.524912	-0.524991	6.06723	0.00802175	0.0476795
FBgn0033504	FBgn0033504	FBgn0033504	CAP	0.507955	0.507958	10.4178	0.00806866	0.047859
FBgn0027835	FBgn0027835	FBgn0027835	Dp1	-0.464556	-0.464573	8.23747	0.00807267	0.047859
FBgn0020907	FBgn0020907	FBgn0020907	Scp2	-0.646728	-0.646981	4.4858	0.00807441	0.047859
FBgn0030269	FBgn0030269	FBgn0030269	CDK2AP1	0.571349	0.571735	3.79426	0.00807609	0.047859
FBgn0003044	FBgn0003044	FBgn0003044	Pcl	-0.551025	-0.551192	5.20866	0.00808406	0.0478704
FBgn0039312	FBgn0039312	FBgn0039312	CG10514	0.640883	0.641249	3.8296	0.00809452	0.0478775
FBgn0031629	FBgn0031629	FBgn0031629	Clect27	0.492178	0.492283	5.21121	0.00809733	0.0478775
FBgn0030735	FBgn0030735	FBgn0030735	CG3632	-0.507249	-0.507309	6.39864	0.00811315	0.0479353
FBgn0054045	FBgn0054045	FBgn0054045	CG34045	0.842339	0.845113	2.48242	0.00819852	0.048328
FBgn0031814	FBgn0031814	FBgn0031814	retm	-0.530021	-0.530053	7.27659	0.00819961	0.048328
FBgn0261574	FBgn0261574	FBgn0261574	kug	-0.506307	-0.506333	7.50151	0.0082118	0.048328
FBgn0004882	FBgn0004882	FBgn0004882	orb	-0.54917	-0.549297	5.46137	0.00821551	0.048328
FBgn0027596	FBgn0027596	FBgn0027596	Kank	0.490609	0.490648	6.85671	0.00821886	0.048328
FBgn0051368	FBgn0051368	FBgn0051368	CG31368	-0.52056	-0.52074	5.10747	0.00822333	0.048328
FBgn0016675	FBgn0016675	FBgn0016675	Lectin-galC1	0.740061	0.742831	1.93389	0.00822648	0.048328
FBgn0085413	FBgn0085413	FBgn0085413	CG34384	-0.539328	-0.539371	6.87351	0.00822838	0.048328
FBgn0025692	FBgn0025692	FBgn0025692	Lfg	1.15611	1.15661	4.42666	0.00824174	0.0483707
FBgn0034570	FBgn0034570	FBgn0034570	CG10543	-0.464663	-0.464687	7.78813	0.00827807	0.0485479
FBgn0037819	FBgn0037819	FBgn0037819	CG14688	-0.695522	-0.696253	3.64453	0.00828654	0.0485617
FBgn0051619	FBgn0051619	FBgn0051619	nolo	-0.56639	-0.566433	6.90607	0.00830509	0.0486231
FBgn0036752	FBgn0036752	FBgn0036752	Adgf-A	-0.598516	-0.599215	3.25337	0.00830928	0.0486231
FBgn0263511	FBgn0263511	FBgn0263511	Vsx1	-0.682162	-0.682986	2.94173	0.00833567	0.0487136
FBgn0030246	FBgn0030246	FBgn0030246	CG1582	-0.538756	-0.538841	6.32469	0.00834581	0.0487136
FBgn0030511	FBgn0030511	FBgn0030511	CG11158	0.593015	0.593629	3.28489	0.00834607	0.0487136
FBgn0027348	FBgn0027348	FBgn0027348	bgm	-0.590835	-0.591067	5.00019	0.00835324	0.0487136
FBgn0010341	FBgn0010341	FBgn0010341	Cdc42	-0.549861	-0.549978	5.80421	0.00835546	0.0487136
FBgn0014868	FBgn0014868	FBgn0014868	Ost48	-0.707904	-0.708457	3.87278	0.00843913	0.0491421
FBgn0053080	FBgn0053080	FBgn0053080	CG33080	0.717515	0.717543	7.25761	0.00844136	0.0491421
FBgn0050000	FBgn0050000	FBgn0050000	GstT1	0.69555	0.695705	5.37189	0.00846035	0.0492165
FBgn0010240	FBgn0010240	FBgn0010240	Lcch3	-0.791174	-0.791873	3.37957	0.00848435	0.04932
FBgn0031710	FBgn0031710	FBgn0031710	Vps52	-0.531212	-0.531452	4.69493	0.00857805	0.0498281

## Sheet: 5h
	genes	FbgnID	symbol	logFC	unshrunk.logFC	logCPM	PValue	FDR
FBgn0003499	FBgn0003499	FBgn0003499	sr	-2.47954	-2.47997	6.24118	1.59403e-43	1.2639e-39
FBgn0029838	FBgn0029838	FBgn0029838	CG4666	2.41781	2.41931	4.20196	1.98182e-32	7.85692e-29
FBgn0052082	FBgn0052082	FBgn0052082	IRSp53	1.62438	1.62441	9.2568	4.98267e-20	1.31692e-16
FBgn0029839	FBgn0029839	FBgn0029839	CG4660	1.76411	1.76437	6.21023	9.46026e-16	1.87526e-12
FBgn0037063	FBgn0037063	FBgn0037063	CG9391	1.96476	1.96491	6.7922	5.84185e-15	9.264e-12
FBgn0036844	FBgn0036844	FBgn0036844	Mkp3	-1.25598	-1.25604	7.77781	5.44028e-14	7.18933e-11
FBgn0030082	FBgn0030082	FBgn0030082	HP1b	1.3608	1.3613	5.172	1.24465e-13	1.40983e-10
FBgn0039151	FBgn0039151	FBgn0039151	CG13607	2.48774	2.48798	6.71165	2.72873e-13	2.70451e-10
FBgn0015221	FBgn0015221	FBgn0015221	Fer2LCH	1.15282	1.15288	7.46259	1.40409e-12	1.23701e-09
FBgn0087005	FBgn0087005	FBgn0087005	rtp	1.4472	1.44722	9.66596	2.1247e-12	1.68467e-09
FBgn0039647	FBgn0039647	FBgn0039647	jus	1.3129	1.31295	8.72785	5.36999e-12	3.87079e-09
FBgn0264344	FBgn0264344	FBgn0264344	CG43800	1.87152	1.87478	2.76094	7.24736e-12	4.78869e-09
FBgn0031688	FBgn0031688	FBgn0031688	Cyp28d2	-2.40587	-2.40743	4.28144	8.15834e-12	4.97005e-09
FBgn0030477	FBgn0030477	FBgn0030477	dmrt11E	1.69905	1.70175	3.17645	8.77546e-12	4.97005e-09
FBgn0265726	FBgn0265726	FBgn0265726	Nna1	1.53778	1.53782	8.76053	9.60059e-12	5.07487e-09
FBgn0037852	FBgn0037852	FBgn0037852	Tpc1	1.39283	1.39311	5.56952	1.5891e-11	7.87498e-09
FBgn0033863	FBgn0033863	FBgn0033863	CG13337	1.32566	1.32612	5.31315	1.95576e-11	9.12188e-09
FBgn0028497	FBgn0028497	FBgn0028497	CG3530	-1.19923	-1.19928	7.85445	2.16759e-11	9.54823e-09
FBgn0051140	FBgn0051140	FBgn0051140	CG31140	-1.15764	-1.15766	9.19541	2.50086e-11	1.04365e-08
FBgn0029930	FBgn0029930	FBgn0029930	CG12541	1.70863	1.70935	4.58152	2.93604e-11	1.16399e-08
FBgn0053003	FBgn0053003	FBgn0053003	CG33003	3.07433	3.07711	5.26425	4.40903e-11	1.66472e-08
FBgn0029835	FBgn0029835	FBgn0029835	CG5921	1.23042	1.23057	6.54806	4.92799e-11	1.77609e-08
FBgn0015351	FBgn0015351	FBgn0015351	CG14906	1.59345	1.59489	3.98685	7.05057e-11	2.43061e-08
FBgn0036279	FBgn0036279	FBgn0036279	Ncc69	1.12078	1.12081	8.70382	8.4766e-11	2.80046e-08
FBgn0023526	FBgn0023526	FBgn0023526	CG2865	1.21821	1.21831	7.15657	1.01432e-10	3.21703e-08
FBgn0267326	FBgn0267326	FBgn0267326	Ntl	-2.8133	-2.81785	3.25537	1.09253e-10	3.33181e-08
FBgn0037933	FBgn0037933	FBgn0037933	Ho	1.2471	1.24829	3.5613	1.69516e-10	4.97811e-08
FBgn0261836	FBgn0261836	FBgn0261836	Msp300	-1.0927	-1.0927	13.3352	2.59166e-10	7.33904e-08
FBgn0050456	FBgn0050456	FBgn0050456	CG30456	1.40669	1.40716	5.02797	2.79151e-10	7.63237e-08
FBgn0039150	FBgn0039150	FBgn0039150	CG13605	2.05729	2.05754	6.19372	4.60038e-10	1.21588e-07
FBgn0031773	FBgn0031773	FBgn0031773	Fbw5	1.45736	1.45773	5.35406	6.09385e-10	1.53155e-07
FBgn0035249	FBgn0035249	FBgn0035249	CG17249	2.05751	2.05863	4.30995	6.18105e-10	1.53155e-07
FBgn0032109	FBgn0032109	FBgn0032109	CG17005	-3.0329	-3.03295	8.98909	9.77293e-10	2.34817e-07
FBgn0038455	FBgn0038455	FBgn0038455	CG14907	1.30938	1.31001	4.6122	1.19227e-09	2.78044e-07
FBgn0259111	FBgn0259111	FBgn0259111	Ndae1	1.11353	1.11356	8.44027	1.38677e-09	3.14163e-07
FBgn0050440	FBgn0050440	FBgn0050440	CG30440	-1.26899	-1.26968	4.42384	2.13453e-09	4.70129e-07
FBgn0037064	FBgn0037064	FBgn0037064	CG9389	2.90837	2.90874	6.28241	2.61377e-09	5.60125e-07
FBgn0015396	FBgn0015396	FBgn0015396	jumu	1.40627	1.40721	3.93103	3.98579e-09	8.31667e-07
FBgn0029088	FBgn0029088	FBgn0029088	disp	1.78209	1.78218	7.60748	4.67419e-09	9.50298e-07
FBgn0031589	FBgn0031589	FBgn0031589	Naprt	1.27562	1.27566	8.61897	5.11269e-09	1.01346e-06
FBgn0027608	FBgn0027608	FBgn0027608	CG2082	-1.08576	-1.08581	7.5732	5.96081e-09	1.15276e-06
FBgn0285926	FBgn0285926	FBgn0285926	Imp	0.906206	0.906258	7.71422	6.19101e-09	1.16877e-06
FBgn0284248	FBgn0284248	FBgn0284248	Cyt-c-p	1.01427	1.01443	5.8485	1.06819e-08	1.95879e-06
FBgn0034935	FBgn0034935	FBgn0034935	Orcokinin	1.44371	1.44407	5.59762	1.08698e-08	1.95879e-06
FBgn0260719	FBgn0260719	FBgn0260719	CR42546	1.91515	1.91604	5.13951	1.2667e-08	2.23192e-06
FBgn0003870	FBgn0003870	FBgn0003870	ttk	1.09652	1.09654	9.20609	1.3415e-08	2.31234e-06
FBgn0037997	FBgn0037997	FBgn0037997	CG14742	1.41942	1.42235	2.59327	1.56691e-08	2.58971e-06
FBgn0005777	FBgn0005777	FBgn0005777	PpD3	-0.946497	-0.946602	6.41844	1.56774e-08	2.58971e-06
FBgn0058006	FBgn0058006	FBgn0058006	CG40006	-1.06237	-1.0626	5.82588	1.86026e-08	3.0102e-06
FBgn0035438	FBgn0035438	FBgn0035438	PHGPx	1.11122	1.11136	6.3707	1.95556e-08	3.10113e-06
FBgn0031263	FBgn0031263	FBgn0031263	Tspo	1.21788	1.21804	6.2372	2.12605e-08	3.30538e-06
FBgn0250785	FBgn0250785	FBgn0250785	vari	-0.899972	-0.900005	7.99522	2.61405e-08	3.98593e-06
FBgn0261560	FBgn0261560	FBgn0261560	Thor	1.74845	1.74853	7.96298	2.68481e-08	4.01658e-06
FBgn0037850	FBgn0037850	FBgn0037850	CG14695	1.53122	1.53219	3.9904	2.84298e-08	4.17444e-06
FBgn0264006	FBgn0264006	FBgn0264006	dysc	-0.876695	-0.876698	11.2501	2.93612e-08	4.23282e-06
FBgn0250757	FBgn0250757	FBgn0250757	CG42235	-1.22431	-1.22468	4.91885	3.13389e-08	4.43726e-06
FBgn0024806	FBgn0024806	FBgn0024806	DIP2	-0.817411	-0.817423	9.3461	3.2626e-08	4.46663e-06
FBgn0033864	FBgn0033864	FBgn0033864	CG18368	1.19047	1.19096	4.84341	3.30763e-08	4.46663e-06
FBgn0263046	FBgn0263046	FBgn0263046	CG43341	1.75105	1.75322	3.52866	3.32363e-08	4.46663e-06
FBgn0037443	FBgn0037443	FBgn0037443	Dmtn	-0.97387	-0.973889	8.93684	3.76858e-08	4.93014e-06
FBgn0052572	FBgn0052572	FBgn0052572	CG32572	2.50148	2.50481	3.63903	3.79289e-08	4.93014e-06
FBgn0029689	FBgn0029689	FBgn0029689	CG6428	1.15585	1.15637	4.55651	5.04162e-08	6.44758e-06
FBgn0053267	FBgn0053267	FBgn0053267	CG33267	1.3536	1.35471	3.93659	6.47925e-08	8.1546e-06
FBgn0037151	FBgn0037151	FBgn0037151	CG7130	1.34288	1.34609	2.57614	6.58351e-08	8.15635e-06
FBgn0037853	FBgn0037853	FBgn0037853	CG14696	1.09832	1.09871	4.93567	6.75968e-08	8.24577e-06
FBgn0086367	FBgn0086367	FBgn0086367	t	0.990654	0.990681	8.33468	6.98907e-08	8.39641e-06
FBgn0040028	FBgn0040028	FBgn0040028	CG17450	1.2675	1.26937	2.55587	8.87719e-08	1.05056e-05
FBgn0034573	FBgn0034573	FBgn0034573	CG3295	1.06145	1.06177	4.89627	9.80241e-08	1.14299e-05
FBgn0034650	FBgn0034650	FBgn0034650	NC2alpha	1.2983	1.29925	3.57245	1.01441e-07	1.16569e-05
FBgn0010531	FBgn0010531	FBgn0010531	Ccs	1.29885	1.29956	3.998	1.11506e-07	1.24667e-05
FBgn0030887	FBgn0030887	FBgn0030887	CG6867	2.00831	2.00849	7.02881	1.12691e-07	1.24667e-05
FBgn0030347	FBgn0030347	FBgn0030347	CG15739	1.17819	1.17927	3.26594	1.13205e-07	1.24667e-05
FBgn0003515	FBgn0003515	FBgn0003515	st	1.01393	1.01448	4.35282	1.3697e-07	1.48772e-05
FBgn0261995	FBgn0261995	FBgn0261995	CG42813	1.05398	1.05455	4.05015	1.52231e-07	1.63114e-05
FBgn0035359	FBgn0035359	FBgn0035359	CG1143	1.48685	1.48751	4.29218	1.65926e-07	1.75417e-05
FBgn0259711	FBgn0259711	FBgn0259711	CG42365	1.10392	1.10456	3.92777	1.68353e-07	1.75641e-05
FBgn0040074	FBgn0040074	FBgn0040074	retinin	1.18833	1.18842	6.7253	2.03475e-07	2.09526e-05
FBgn0039590	FBgn0039590	FBgn0039590	CG10011	0.917898	0.917934	7.98479	2.16105e-07	2.19679e-05
FBgn0038428	FBgn0038428	FBgn0038428	CG14894	1.13488	1.13529	4.79179	2.21986e-07	2.22801e-05
FBgn0266672	FBgn0266672	FBgn0266672	Sec8	-0.834339	-0.834403	6.92229	2.28848e-07	2.26817e-05
FBgn0032945	FBgn0032945	FBgn0032945	CG8665	-1.05528	-1.05573	4.99154	2.39583e-07	2.34525e-05
FBgn0036813	FBgn0036813	FBgn0036813	Atg3	0.958359	0.958619	5.26248	2.43219e-07	2.35181e-05
FBgn0261999	FBgn0261999	FBgn0261999	Ca-Ma2d	-1.12765	-1.12768	8.61527	2.50749e-07	2.39541e-05
FBgn0086443	FBgn0086443	FBgn0086443	AsnRS	1.49788	1.49811	6.02352	2.60957e-07	2.46325e-05
FBgn0262482	FBgn0262482	FBgn0262482	CG43072	-1.28774	-1.28901	3.27242	2.71442e-07	2.53208e-05
FBgn0002069	FBgn0002069	FBgn0002069	AspRS	1.07674	1.07686	6.64747	2.74836e-07	2.53392e-05
FBgn0028888	FBgn0028888	FBgn0028888	CG4168	0.978393	0.978421	8.34296	2.9163e-07	2.65785e-05
FBgn0030121	FBgn0030121	FBgn0030121	Cfp1	1.36845	1.36868	5.73888	2.99975e-07	2.67994e-05
FBgn0026143	FBgn0026143	FBgn0026143	CDC45L	1.06235	1.06301	4.14794	3.00813e-07	2.67994e-05
FBgn0038930	FBgn0038930	FBgn0038930	CG5778	-1.85051	-1.8521	3.88476	3.27174e-07	2.88241e-05
FBgn0033443	FBgn0033443	FBgn0033443	CG1698	2.47096	2.47171	5.53384	3.39873e-07	2.96138e-05
FBgn0029660	FBgn0029660	FBgn0029660	CG10801	-1.28753	-1.28886	3.33284	3.4481e-07	2.97174e-05
FBgn0052806	FBgn0052806	FBgn0052806	CG32806	-1.55458	-1.55606	3.47617	3.63058e-07	3.09536e-05
FBgn0014859	FBgn0014859	FBgn0014859	Hr38	-1.75307	-1.75314	8.21952	3.91819e-07	3.30504e-05
FBgn0033936	FBgn0033936	FBgn0033936	Achl	1.52192	1.52196	8.81552	4.17918e-07	3.48807e-05
FBgn0004926	FBgn0004926	FBgn0004926	eIF2beta	1.12812	1.12837	5.42888	4.64795e-07	3.83892e-05
FBgn0028708	FBgn0028708	FBgn0028708	Mst85C	1.00232	1.00304	3.61919	5.18117e-07	4.2352e-05
FBgn0261402	FBgn0261402	FBgn0261402	Ir75b	-1.09553	-1.09659	3.44201	5.4319e-07	4.38863e-05
FBgn0031068	FBgn0031068	FBgn0031068	Alr	1.17323	1.17381	4.39586	5.47956e-07	4.38863e-05
FBgn0285912	FBgn0285912	FBgn0285912	mah	1.39894	1.39954	5.16018	5.72353e-07	4.53819e-05
FBgn0011280	FBgn0011280	FBgn0011280	Obp19d	1.06537	1.0654	8.34272	5.92185e-07	4.64895e-05
FBgn0035499	FBgn0035499	FBgn0035499	Chd64	1.05326	1.05336	6.58683	6.02187e-07	4.68112e-05
FBgn0035247	FBgn0035247	FBgn0035247	metl	1.33944	1.34082	3.13347	6.89826e-07	5.31032e-05
FBgn0030610	FBgn0030610	FBgn0030610	CG9065	0.893021	0.893395	4.34498	7.20218e-07	5.49097e-05
FBgn0262732	FBgn0262732	FBgn0262732	mbf1	0.923321	0.923452	6.15536	7.44229e-07	5.61999e-05
FBgn0002936	FBgn0002936	FBgn0002936	ninaA	0.779212	0.779286	6.69121	7.79576e-07	5.83137e-05
FBgn0028572	FBgn0028572	FBgn0028572	qtc	0.814015	0.814059	7.55454	7.98625e-07	5.91803e-05
FBgn0034470	FBgn0034470	FBgn0034470	Obp56d	1.11748	1.11766	5.43548	8.22418e-07	6.03792e-05
FBgn0085638	FBgn0085638	FBgn0085638	CG41378	-0.851112	-0.851273	5.86694	8.49588e-07	6.18017e-05
FBgn0028895	FBgn0028895	FBgn0028895	CG17328	1.24704	1.24936	2.48675	9.30511e-07	6.70729e-05
FBgn0031286	FBgn0031286	FBgn0031286	CG3862	1.10452	1.10533	3.85008	9.51767e-07	6.7987e-05
FBgn0027106	FBgn0027106	FBgn0027106	Inx7	-1.18551	-1.18598	4.44488	9.87405e-07	6.9903e-05
FBgn0035988	FBgn0035988	FBgn0035988	CG3982	-1.05664	-1.05713	4.50929	9.99012e-07	7.00988e-05
FBgn0011202	FBgn0011202	FBgn0011202	dia	0.742058	0.742092	7.71382	1.01913e-06	7.08832e-05
FBgn0052544	FBgn0052544	FBgn0052544	CG32544	1.09191	1.09259	3.86083	1.2347e-06	8.51297e-05
FBgn0003279	FBgn0003279	FBgn0003279	RpL4	1.02136	1.02139	8.34966	1.27745e-06	8.73181e-05
FBgn0087011	FBgn0087011	FBgn0087011	CG41520	-0.95581	-0.956206	4.77262	1.30142e-06	8.81965e-05
FBgn0029860	FBgn0029860	FBgn0029860	CG15891	1.10203	1.10269	4.16737	1.35946e-06	9.13488e-05
FBgn0010263	FBgn0010263	FBgn0010263	Rbp9	0.810038	0.810051	9.41731	1.53499e-06	0.000102276
FBgn0033226	FBgn0033226	FBgn0033226	CG1882	1.10122	1.10128	7.80055	1.5599e-06	0.000103071
FBgn0016672	FBgn0016672	FBgn0016672	Ipp	0.840678	0.840777	6.2837	1.62073e-06	0.000106205
FBgn0030223	FBgn0030223	FBgn0030223	CG2111	-0.821328	-0.82141	6.45171	1.74804e-06	0.000113608
FBgn0029929	FBgn0029929	FBgn0029929	CG4593	1.23042	1.23266	2.56666	1.8745e-06	0.000120836
FBgn0266918	FBgn0266918	FBgn0266918	CG32486	-0.825304	-0.825325	8.66889	1.94271e-06	0.000124224
FBgn0051176	FBgn0051176	FBgn0051176	CG31176	-0.929734	-0.930603	3.67217	1.96429e-06	0.000124599
FBgn0030311	FBgn0030311	FBgn0030311	CG11699	1.12272	1.12356	3.59219	2.02513e-06	0.000127439
FBgn0034728	FBgn0034728	FBgn0034728	rad50	0.836066	0.836288	5.30695	2.13486e-06	0.000133286
FBgn0033855	FBgn0033855	FBgn0033855	link	1.16518	1.16691	2.65434	2.22183e-06	0.000137632
FBgn0029824	FBgn0029824	FBgn0029824	CG3726	1.07826	1.07846	5.85584	2.36608e-06	0.000145432
FBgn0004436	FBgn0004436	FBgn0004436	Ubc6	0.873184	0.873283	6.38231	2.45467e-06	0.000149716
FBgn0032020	FBgn0032020	FBgn0032020	strat	1.03224	1.03346	3.09112	2.49087e-06	0.000150764
FBgn0040697	FBgn0040697	FBgn0040697	Teh3	0.851112	0.851168	7.07519	2.83551e-06	0.000170324
FBgn0015777	FBgn0015777	FBgn0015777	nrv2	-0.828065	-0.828129	6.94743	3.28748e-06	0.000195988
FBgn0001075	FBgn0001075	FBgn0001075	ft	-0.978389	-0.978466	6.90555	3.38818e-06	0.000200484
FBgn0038659	FBgn0038659	FBgn0038659	EndoA	0.757845	0.757871	8.10229	3.4888e-06	0.000204909
FBgn0016919	FBgn0016919	FBgn0016919	nompB	1.55267	1.55279	7.58532	3.91473e-06	0.000228235
FBgn0035159	FBgn0035159	FBgn0035159	CG13896	-1.30455	-1.30635	3.5183	4.14131e-06	0.000239682
FBgn0035578	FBgn0035578	FBgn0035578	CG13707	1.0457	1.04652	4.08998	4.17691e-06	0.000239991
FBgn0031505	FBgn0031505	FBgn0031505	ND-B14.5B	0.961192	0.961692	3.98091	4.33001e-06	0.000246998
FBgn0053554	FBgn0053554	FBgn0053554	Nipped-A	-0.798559	-0.798591	8.04376	4.46124e-06	0.000252666
FBgn0030189	FBgn0030189	FBgn0030189	CG2909	1.02788	1.02847	3.79578	4.61438e-06	0.000259485
FBgn0086251	FBgn0086251	FBgn0086251	del	-1.24936	-1.25191	2.95786	4.67766e-06	0.000261192
FBgn0004855	FBgn0004855	FBgn0004855	RpII15	1.06332	1.065	2.72235	5.175e-06	0.00028461
FBgn0022787	FBgn0022787	FBgn0022787	Hel89B	-0.892342	-0.892369	8.35565	5.21182e-06	0.00028461
FBgn0261649	FBgn0261649	FBgn0261649	tinc	1.00884	1.0089	7.59533	5.26056e-06	0.00028461
FBgn0040299	FBgn0040299	FBgn0040299	Myo28B1	1.31888	1.31912	5.98129	5.26843e-06	0.00028461
FBgn0037554	FBgn0037554	FBgn0037554	DNApol-iota	0.909701	0.909871	5.64314	5.27654e-06	0.00028461
FBgn0037410	FBgn0037410	FBgn0037410	Osi2	1.27604	1.27719	3.55587	5.52316e-06	0.000295899
FBgn0032819	FBgn0032819	FBgn0032819	CG10463	1.08205	1.08317	3.32593	5.57673e-06	0.000296435
FBgn0051858	FBgn0051858	FBgn0051858	t-cup	-1.30491	-1.30798	2.31955	5.61957e-06	0.000296435
FBgn0012034	FBgn0012034	FBgn0012034	AcCoAS	1.14098	1.14099	9.08881	5.66001e-06	0.000296435
FBgn0010226	FBgn0010226	FBgn0010226	GstS1	0.849685	0.849916	5.13182	5.68269e-06	0.000296435
FBgn0033104	FBgn0033104	FBgn0033104	CG15237	1.24688	1.25027	2.06229	5.80424e-06	0.000300796
FBgn0034225	FBgn0034225	FBgn0034225	veil	-1.22986	-1.23241	2.65816	6.36487e-06	0.00032662
FBgn0027836	FBgn0027836	FBgn0027836	Dgp-1	1.43944	1.43955	6.86512	6.38493e-06	0.00032662
FBgn0039494	FBgn0039494	FBgn0039494	grass	0.997174	0.997444	5.36193	6.51813e-06	0.000331297
FBgn0022959	FBgn0022959	FBgn0022959	yps	0.918498	0.918579	6.90122	6.59108e-06	0.00033287
FBgn0263747	FBgn0263747	FBgn0263747	CG43672	-1.54548	-1.54663	4.36947	6.85739e-06	0.000344128
FBgn0002887	FBgn0002887	FBgn0002887	mus201	0.872224	0.872488	4.87128	7.13274e-06	0.00035466
FBgn0021906	FBgn0021906	FBgn0021906	RFeSP	0.860486	0.860565	6.51487	7.15672e-06	0.00035466
FBgn0031264	FBgn0031264	FBgn0031264	CG11835	1.12575	1.12714	3.01764	7.22265e-06	0.000355704
FBgn0051323	FBgn0051323	FBgn0051323	CG31323	1.07881	1.07955	3.78244	7.33729e-06	0.00035912
FBgn0035132	FBgn0035132	FBgn0035132	mthl10	-0.841741	-0.842067	4.74364	8.48457e-06	0.000412725
FBgn0036360	FBgn0036360	FBgn0036360	CG10713	-1.12328	-1.12479	2.81191	8.87678e-06	0.000424661
FBgn0034970	FBgn0034970	FBgn0034970	yki	0.73195	0.732129	5.27074	8.88814e-06	0.000424661
FBgn0261479	FBgn0261479	FBgn0261479	nero	1.03092	1.03268	2.68429	8.89063e-06	0.000424661
FBgn0030431	FBgn0030431	FBgn0030431	CG4407	1.05552	1.05591	4.68106	8.99238e-06	0.00042695
FBgn0052707	FBgn0052707	FBgn0052707	APC4	1.17768	1.17806	5.2832	9.068e-06	0.000427977
FBgn0031381	FBgn0031381	FBgn0031381	Npc2a	0.854498	0.854653	5.59928	9.48257e-06	0.000444895
FBgn0037098	FBgn0037098	FBgn0037098	Wnk	-0.807855	-0.807867	9.21609	9.79066e-06	0.000453557
FBgn0050054	FBgn0050054	FBgn0050054	CG30054	-1.17959	-1.18022	4.29329	9.8612e-06	0.000453557
FBgn0003248	FBgn0003248	FBgn0003248	Rh2	0.791814	0.791984	5.4259	9.87847e-06	0.000453557
FBgn0050438	FBgn0050438	FBgn0050438	Ugt50B3	-0.985762	-0.987261	2.89687	9.896e-06	0.000453557
FBgn0028577	FBgn0028577	FBgn0028577	hfp	0.752422	0.752437	8.81028	1.0222e-05	0.000465804
FBgn0030467	FBgn0030467	FBgn0030467	CG1764	1.08887	1.08902	6.19244	1.05556e-05	0.00047826
FBgn0027335	FBgn0027335	FBgn0027335	Rip11	0.799466	0.799486	8.5184	1.12397e-05	0.000506363
FBgn0035544	FBgn0035544	FBgn0035544	CG15021	1.06577	1.06626	4.34362	1.16408e-05	0.00052147
FBgn0260860	FBgn0260860	FBgn0260860	Bet5	0.994356	0.995819	2.84039	1.20384e-05	0.000536249
FBgn0034290	FBgn0034290	FBgn0034290	CG5773	0.994257	0.995173	3.59609	1.22114e-05	0.000537927
FBgn0011693	FBgn0011693	FBgn0011693	Pdh	1.21416	1.21421	7.93897	1.22117e-05	0.000537927
FBgn0040606	FBgn0040606	FBgn0040606	CG6503	-1.331	-1.33205	3.24352	1.25033e-05	0.000547726
FBgn0031299	FBgn0031299	FBgn0031299	CG4629	1.00917	1.00923	7.08012	1.28352e-05	0.000559179
FBgn0086446	FBgn0086446	FBgn0086446	DCTN6-p27	1.28099	1.2821	3.60489	1.29942e-05	0.00056301
FBgn0035914	FBgn0035914	FBgn0035914	CG6282	0.809269	0.809293	8.41414	1.31065e-05	0.00056479
FBgn0025814	FBgn0025814	FBgn0025814	Mgstl	1.01509	1.01522	6.01361	1.32189e-05	0.000566553
FBgn0034793	FBgn0034793	FBgn0034793	asrij	1.33581	1.33673	4.10288	1.35424e-05	0.000577301
FBgn0260944	FBgn0260944	FBgn0260944	Rbp1	0.78575	0.78588	5.83943	1.45652e-05	0.000617582
FBgn0051216	FBgn0051216	FBgn0051216	Naam	-1.03834	-1.04032	2.86998	1.46452e-05	0.000617667
FBgn0037560	FBgn0037560	FBgn0037560	CR18228	0.983942	0.984741	3.88852	1.53246e-05	0.000642903
FBgn0050431	FBgn0050431	FBgn0050431	CG30431	0.96752	0.968073	4.09932	1.55457e-05	0.000648745
FBgn0036272	FBgn0036272	FBgn0036272	Sms	0.824113	0.824229	6.1929	1.59151e-05	0.000660684
FBgn0032731	FBgn0032731	FBgn0032731	Swip-1	-1.35603	-1.3566	5.0677	1.62915e-05	0.000672787
FBgn0039509	FBgn0039509	FBgn0039509	bigmax	1.00624	1.00692	4.07488	1.74368e-05	0.000716356
FBgn0052529	FBgn0052529	FBgn0052529	Hers	0.684865	0.684873	9.63006	1.75396e-05	0.000716864
FBgn0036757	FBgn0036757	FBgn0036757	Ir75a	-0.91507	-0.915712	3.99706	1.79802e-05	0.000731103
FBgn0039808	FBgn0039808	FBgn0039808	CG12071	0.813689	0.813719	8.25705	1.91088e-05	0.000773027
FBgn0024804	FBgn0024804	FBgn0024804	Dbp80	-0.701599	-0.701624	8.21279	1.95158e-05	0.000785484
FBgn0264953	FBgn0264953	FBgn0264953	Piezo	0.878625	0.878634	9.61032	1.99844e-05	0.000800285
FBgn0039488	FBgn0039488	FBgn0039488	CG6066	1.25448	1.25654	2.58503	2.02117e-05	0.000805321
FBgn0028737	FBgn0028737	FBgn0028737	eEF1beta	0.951798	0.951944	5.92052	2.03839e-05	0.00080812
FBgn0037551	FBgn0037551	FBgn0037551	Arl8	1.54676	1.54692	6.56359	2.11067e-05	0.000832612
FBgn0085407	FBgn0085407	FBgn0085407	Pvf3	-0.813977	-0.814177	5.27641	2.17867e-05	0.000855182
FBgn0051897	FBgn0051897	FBgn0051897	CG31897	0.988685	0.989736	3.28705	2.27423e-05	0.000888294
FBgn0030654	FBgn0030654	FBgn0030654	CG15643	1.20592	1.20779	2.65603	2.28816e-05	0.000889352
FBgn0036985	FBgn0036985	FBgn0036985	zye	-1.06856	-1.06971	3.48246	2.30204e-05	0.000890383
FBgn0029672	FBgn0029672	FBgn0029672	CG2875	-0.995362	-0.99627	3.51389	2.39988e-05	0.000923722
FBgn0085195	FBgn0085195	FBgn0085195	CG34166	-0.890159	-0.890646	4.11901	2.43255e-05	0.000931773
FBgn0037262	FBgn0037262	FBgn0037262	MED31	0.742701	0.742985	4.79679	2.52116e-05	0.000961072
FBgn0041627	FBgn0041627	FBgn0041627	Ku80	0.95508	0.955857	3.56421	2.55e-05	0.000967414
FBgn0052675	FBgn0052675	FBgn0052675	Tango5	0.753264	0.753322	7.12572	2.61323e-05	0.00098668
FBgn0034187	FBgn0034187	FBgn0034187	CG6967	-1.10782	-1.10944	2.85851	2.66995e-05	0.00100332
FBgn0259685	FBgn0259685	FBgn0259685	crb	-0.758252	-0.758257	10.5052	2.72353e-05	0.00101863
FBgn0051961	FBgn0051961	FBgn0051961	TBCC	1.01636	1.01666	5.21302	2.7391e-05	0.00101964
FBgn0037082	FBgn0037082	FBgn0037082	CG5664	0.983453	0.984113	4.14677	2.77762e-05	0.00102915
FBgn0022338	FBgn0022338	FBgn0022338	dnk	1.12199	1.12387	2.39127	2.94391e-05	0.00108569
FBgn0035285	FBgn0035285	FBgn0035285	CG12025	0.681867	0.681923	6.91665	2.98584e-05	0.00109605
FBgn0010803	FBgn0010803	FBgn0010803	TrpRS	0.738927	0.739006	6.33609	3.02531e-05	0.00110542
FBgn0250814	FBgn0250814	FBgn0250814	UQCR-C2	0.794198	0.794257	6.81918	3.10835e-05	0.00113056
FBgn0032000	FBgn0032000	FBgn0032000	CG8372	1.03902	1.04039	2.88921	3.1254e-05	0.00113157
FBgn0261797	FBgn0261797	FBgn0261797	Dhc64C	-0.674865	-0.674873	9.75514	3.14092e-05	0.00113202
FBgn0265272	FBgn0265272	FBgn0265272	CG30060	-0.985237	-0.986891	2.68227	3.18654e-05	0.00114326
FBgn0265784	FBgn0265784	FBgn0265784	CrebB	-0.909641	-0.909694	7.43888	3.20674e-05	0.00114532
FBgn0033814	FBgn0033814	FBgn0033814	Qsox1	0.719022	0.719187	5.34673	3.29633e-05	0.00116724
FBgn0029504	FBgn0029504	FBgn0029504	CHES-1-like	0.840011	0.840053	7.8652	3.29753e-05	0.00116724
FBgn0043792	FBgn0043792	FBgn0043792	CG30427	-0.824475	-0.824896	4.37493	3.33136e-05	0.00117194
FBgn0029155	FBgn0029155	FBgn0029155	Men-b	0.701156	0.701181	8.11366	3.34037e-05	0.00117194
FBgn0035287	FBgn0035287	FBgn0035287	CG13937	0.820273	0.82038	5.94455	3.4372e-05	0.0012006
FBgn0034914	FBgn0034914	FBgn0034914	CG5554	0.748522	0.748697	5.32932	3.48572e-05	0.0012122
FBgn0031775	FBgn0031775	FBgn0031775	CG9150	1.20103	1.20135	5.51497	3.58312e-05	0.00124064
FBgn0039703	FBgn0039703	FBgn0039703	CG7829	1.0572	1.05799	3.64059	3.62887e-05	0.00125101
FBgn0004397	FBgn0004397	FBgn0004397	Vinc	-0.697837	-0.697842	10.1235	3.69702e-05	0.00126388
FBgn0037120	FBgn0037120	FBgn0037120	CG11247	0.820853	0.820986	5.91417	3.69808e-05	0.00126388
FBgn0033086	FBgn0033086	FBgn0033086	CG9410	1.00569	1.00697	2.90246	3.71904e-05	0.00126559
FBgn0033515	FBgn0033515	FBgn0033515	Ir47a	-0.991052	-0.991996	3.18902	3.77148e-05	0.00127795
FBgn0034008	FBgn0034008	FBgn0034008	CG8152	0.934548	0.935305	3.58775	3.78809e-05	0.00127812
FBgn0286027	FBgn0286027	FBgn0286027	Rnmt	0.895866	0.896834	3.30599	3.81242e-05	0.00128088
FBgn0020378	FBgn0020378	FBgn0020378	Sp1	-0.901053	-0.90183	3.65574	3.87406e-05	0.00129144
FBgn0026592	FBgn0026592	FBgn0026592	Fie	0.797058	0.797206	5.52382	3.87644e-05	0.00129144
FBgn0004622	FBgn0004622	FBgn0004622	TkR99D	-1.18605	-1.18781	2.95925	3.89882e-05	0.00129346
FBgn0030195	FBgn0030195	FBgn0030195	CG2898	-1.00463	-1.0049	5.22395	3.97325e-05	0.00131266
FBgn0039726	FBgn0039726	FBgn0039726	eIF2Balpha	0.961449	0.962244	3.49217	4.03209e-05	0.00132657
FBgn0040765	FBgn0040765	FBgn0040765	luna	-1.06429	-1.06437	7.8226	4.1135e-05	0.00134302
FBgn0031060	FBgn0031060	FBgn0031060	CG14231	0.951044	0.952509	2.76172	4.12565e-05	0.00134302
FBgn0264817	FBgn0264817	FBgn0264817	pre-lola-G	-1.16262	-1.16704	1.60041	4.13288e-05	0.00134302
FBgn0034312	FBgn0034312	FBgn0034312	CG10916	0.847695	0.847903	5.30118	4.22568e-05	0.0013658
FBgn0030027	FBgn0030027	FBgn0030027	CG1632	0.978409	0.978916	4.26665	4.24768e-05	0.0013658
FBgn0026079	FBgn0026079	FBgn0026079	Nsun2	0.794515	0.795067	3.989	4.25468e-05	0.0013658
FBgn0000633	FBgn0000633	FBgn0000633	CG17716	0.76587	0.765891	8.36363	4.28866e-05	0.00137116
FBgn0039552	FBgn0039552	FBgn0039552	CG12426	-1.03371	-1.03614	2.29645	4.67642e-05	0.00148913
FBgn0038857	FBgn0038857	FBgn0038857	Bdbt	0.958673	0.960077	2.83323	4.80196e-05	0.00152299
FBgn0025838	FBgn0025838	FBgn0025838	CG2652	1.17118	1.17455	1.97642	4.86087e-05	0.00153553
FBgn0036302	FBgn0036302	FBgn0036302	sowah	-0.793324	-0.793388	6.93203	5.01694e-05	0.00157778
FBgn0261015	FBgn0261015	FBgn0261015	Pif1A	-0.755628	-0.75571	6.44182	5.03441e-05	0.00157778
FBgn0267002	FBgn0267002	FBgn0267002	unc-104	-0.700346	-0.700349	11.2218	5.06345e-05	0.00158063
FBgn0040773	FBgn0040773	FBgn0040773	COX7C	0.763388	0.76362	4.79877	5.10112e-05	0.00158615
FBgn0052767	FBgn0052767	FBgn0052767	CG32767	0.654609	0.654628	8.53434	5.2084e-05	0.00161318
FBgn0051357	FBgn0051357	FBgn0051357	CG31357	0.775552	0.776	3.86979	5.23416e-05	0.00161485
FBgn0030041	FBgn0030041	FBgn0030041	CG12116	1.08085	1.08138	4.22962	5.46397e-05	0.00167922
FBgn0033570	FBgn0033570	FBgn0033570	ND-B14	0.889598	0.890154	3.86398	5.58963e-05	0.0017112
FBgn0036239	FBgn0036239	FBgn0036239	Pop2	0.785467	0.785547	6.43576	5.63672e-05	0.00171898
FBgn0053094	FBgn0053094	FBgn0053094	Synd	-0.628539	-0.628559	8.17103	5.66235e-05	0.00172018
FBgn0034617	FBgn0034617	FBgn0034617	Panx	1.01361	1.01454	3.18806	5.74782e-05	0.00173948
FBgn0029859	FBgn0029859	FBgn0029859	CG15892	0.781662	0.781906	5.0056	5.7934e-05	0.00174661
FBgn0083956	FBgn0083956	FBgn0083956	CG34120	-0.698347	-0.698374	8.01989	5.93316e-05	0.00178197
FBgn0033372	FBgn0033372	FBgn0033372	CG13742	-1.18449	-1.18911	1.54263	5.96515e-05	0.00178482
FBgn0031692	FBgn0031692	FBgn0031692	TpnC25D	1.22932	1.22965	5.01051	6.01234e-05	0.00179218
FBgn0001225	FBgn0001225	FBgn0001225	Hsp26	3.09067	3.09091	8.03616	6.3729e-05	0.00189254
FBgn0041630	FBgn0041630	FBgn0041630	Hexo1	0.973005	0.973127	5.9906	6.55834e-05	0.00194034
FBgn0031660	FBgn0031660	FBgn0031660	mRpL28	0.839297	0.839515	5.11004	6.63812e-05	0.00195664
FBgn0039525	FBgn0039525	FBgn0039525	CG5646	1.27857	1.27872	6.41021	6.68941e-05	0.00196446
FBgn0000120	FBgn0000120	FBgn0000120	Arr1	0.743558	0.743561	11.3737	6.82072e-05	0.00199563
FBgn0026616	FBgn0026616	FBgn0026616	alpha-Man-IIb	0.832151	0.832187	7.72413	6.91735e-05	0.00201646
FBgn0030294	FBgn0030294	FBgn0030294	Pa1	1.11842	1.11904	4.0356	6.96304e-05	0.00202234
FBgn0032032	FBgn0032032	FBgn0032032	CG17294	0.868046	0.868651	3.65318	7.22475e-05	0.0020907
FBgn0054045	FBgn0054045	FBgn0054045	CG34045	1.24077	1.2444	2.48242	7.26851e-05	0.00209571
FBgn0041004	FBgn0041004	FBgn0041004	CG17715	-0.932628	-0.934171	2.64724	7.33495e-05	0.0021072
FBgn0286203	FBgn0286203	FBgn0286203	stw	-0.707854	-0.708043	5.31093	7.76819e-05	0.00222361
FBgn0035439	FBgn0035439	FBgn0035439	CG14961	1.80303	1.80367	5.07584	7.81529e-05	0.0022282
FBgn0036196	FBgn0036196	FBgn0036196	CG11658	0.697946	0.698079	5.59506	7.84044e-05	0.0022282
FBgn0001258	FBgn0001258	FBgn0001258	Ldh	1.74971	1.7504	5.741	8.03706e-05	0.00227132
FBgn0028292	FBgn0028292	FBgn0028292	ric8a	0.740556	0.740693	5.66705	8.06609e-05	0.00227132
FBgn0038400	FBgn0038400	FBgn0038400	CG5903	0.727739	0.727852	5.81612	8.07809e-05	0.00227132
FBgn0037304	FBgn0037304	FBgn0037304	CG1113	0.869501	0.870421	3.55312	8.18884e-05	0.00229432
FBgn0027341	FBgn0027341	FBgn0027341	Gfat1	-0.857219	-0.857479	5.03082	8.28498e-05	0.00231308
FBgn0038948	FBgn0038948	FBgn0038948	PSR	0.880791	0.881211	4.23761	8.32923e-05	0.00231728
FBgn0052581	FBgn0052581	FBgn0052581	CG32581	1.44466	1.44584	3.54649	8.41531e-05	0.00233304
FBgn0037391	FBgn0037391	FBgn0037391	CG2017	1.88824	1.88829	8.44706	8.64986e-05	0.00238971
FBgn0020388	FBgn0020388	FBgn0020388	Gcn5	0.744249	0.744312	6.49937	8.79988e-05	0.00242272
FBgn0037754	FBgn0037754	FBgn0037754	CG8500	0.677058	0.677095	7.41743	9.09961e-05	0.00249657
FBgn0030421	FBgn0030421	FBgn0030421	Agpat1	0.731954	0.732135	5.45549	9.31641e-05	0.00254723
FBgn0264432	FBgn0264432	FBgn0264432	CG43850	-0.940372	-0.941544	2.84008	9.41077e-05	0.00256419
FBgn0035383	FBgn0035383	FBgn0035383	CPT2	0.717037	0.717212	5.44782	9.67955e-05	0.0026284
FBgn0031284	FBgn0031284	FBgn0031284	PGAP2	1.11576	1.11745	2.69853	9.88768e-05	0.00267434
FBgn0024997	FBgn0024997	FBgn0024997	CG2681	1.55268	1.55299	5.5467	9.91621e-05	0.00267434
FBgn0034971	FBgn0034971	FBgn0034971	Gpat4	0.747076	0.747125	7.26813	9.98487e-05	0.00268373
FBgn0037882	FBgn0037882	FBgn0037882	CG17187	1.02448	1.02601	2.65075	0.000100423	0.00269004
FBgn0039461	FBgn0039461	FBgn0039461	CG5500	0.966324	0.967187	3.54922	0.000101429	0.00269789
FBgn0032536	FBgn0032536	FBgn0032536	Ance-3	-0.811536	-0.81203	4.10777	0.000101601	0.00269789
FBgn0010401	FBgn0010401	FBgn0010401	Os-C	1.56069	1.56257	3.32881	0.000101737	0.00269789
FBgn0260429	FBgn0260429	FBgn0260429	CG42524	-0.74931	-0.749551	5.02651	0.000102104	0.00269862
FBgn0284435	FBgn0284435	FBgn0284435	tyn	-0.957384	-0.957681	5.00195	0.000104544	0.00275391
FBgn0032394	FBgn0032394	FBgn0032394	Hacd1	0.919978	0.920771	3.29708	0.00010537	0.00276649
FBgn0052396	FBgn0052396	FBgn0052396	CG32396	-0.940933	-0.941903	3.55918	0.000106291	0.00278145
FBgn0050046	FBgn0050046	FBgn0050046	CG30046	1.6215	1.62178	6.02065	0.000109897	0.00286637
FBgn0085427	FBgn0085427	FBgn0085427	CG34398	-0.715005	-0.715051	7.50734	0.000113305	0.00294183
FBgn0058178	FBgn0058178	FBgn0058178	CG40178	-0.671447	-0.671464	8.6878	0.00011366	0.00294183
FBgn0003963	FBgn0003963	FBgn0003963	ush	-0.87556	-0.875768	5.42437	0.000114048	0.00294183
FBgn0053196	FBgn0053196	FBgn0053196	dpy	-0.65917	-0.659172	11.4591	0.000114274	0.00294183
FBgn0039925	FBgn0039925	FBgn0039925	Kif3C	0.948771	0.949145	5.56784	0.000114852	0.00294712
FBgn0052672	FBgn0052672	FBgn0052672	Atg8a	0.755841	0.755905	6.75076	0.000116162	0.00297112
FBgn0034753	FBgn0034753	FBgn0034753	CG2852	0.727993	0.72817	5.19239	0.00011692	0.0029809
FBgn0005659	FBgn0005659	FBgn0005659	Ets98B	-0.745476	-0.745642	5.63662	0.000119414	0.00303473
FBgn0036287	FBgn0036287	FBgn0036287	CG10663	-1.03423	-1.03618	2.52114	0.000119869	0.00303656
FBgn0261262	FBgn0261262	FBgn0261262	CG42613	-0.802391	-0.802439	7.25498	0.000120595	0.00304521
FBgn0028886	FBgn0028886	FBgn0028886	CG15279	-0.872459	-0.873533	3.12263	0.000123486	0.00310506
FBgn0035168	FBgn0035168	FBgn0035168	cep290	1.35771	1.35846	4.18268	0.000123748	0.00310506
FBgn0001098	FBgn0001098	FBgn0001098	Gdh	0.748303	0.74833	7.90804	0.000124782	0.00312112
FBgn0036843	FBgn0036843	FBgn0036843	Sfxn2	0.860594	0.86122	3.91283	0.000125996	0.00313352
FBgn0033739	FBgn0033739	FBgn0033739	Dyb	0.71439	0.714397	9.75549	0.000126068	0.00313352
FBgn0031062	FBgn0031062	FBgn0031062	CG14230	0.853953	0.854774	3.40937	0.000127098	0.00314924
FBgn0052537	FBgn0052537	FBgn0052537	CG32537	0.727317	0.727633	4.49143	0.000127941	0.00316026
FBgn0027790	FBgn0027790	FBgn0027790	GV1	-0.727052	-0.727312	4.64965	0.000129085	0.00317861
FBgn0035989	FBgn0035989	FBgn0035989	Tat	-0.679896	-0.679974	6.50296	0.00013064	0.00320694
FBgn0260972	FBgn0260972	FBgn0260972	alc	0.700355	0.700482	5.65267	0.000132231	0.00323598
FBgn0052195	FBgn0052195	FBgn0052195	CG32195	-0.926011	-0.927379	2.73896	0.00013364	0.00326042
FBgn0053180	FBgn0053180	FBgn0053180	Ranbp16	-0.671955	-0.672002	6.92724	0.000134253	0.0032653
FBgn0264325	FBgn0264325	FBgn0264325	Atg6	0.82115	0.821612	3.98621	0.000136877	0.00331896
FBgn0033159	FBgn0033159	FBgn0033159	Dscam1	-0.793866	-0.793889	8.88421	0.000140818	0.00340411
FBgn0261705	FBgn0261705	FBgn0261705	CG42741	-1.0555	-1.05712	2.90091	0.00014153	0.00341091
FBgn0034808	FBgn0034808	FBgn0034808	CG9896	-0.87828	-0.878867	3.98553	0.000142424	0.00342029
FBgn0011305	FBgn0011305	FBgn0011305	Rsf1	0.72182	0.72203	4.93544	0.000142782	0.00342029
FBgn0051133	FBgn0051133	FBgn0051133	Slimp	1.03904	1.04089	2.62069	0.000145313	0.00346545
FBgn0037890	FBgn0037890	FBgn0037890	CG17734	0.778856	0.779134	4.66972	0.000145898	0.00346545
FBgn0260747	FBgn0260747	FBgn0260747	Chchd2	0.831749	0.831848	6.26873	0.000145978	0.00346545
FBgn0003231	FBgn0003231	FBgn0003231	ref(2)P	1.20944	1.20949	7.93628	0.000147383	0.00348837
FBgn0039303	FBgn0039303	FBgn0039303	CG11857	0.771854	0.772079	5.08632	0.000148577	0.00350615
FBgn0039277	FBgn0039277	FBgn0039277	Nepl16	-0.666772	-0.666895	5.58698	0.000149748	0.00352329
FBgn0029888	FBgn0029888	FBgn0029888	ND-ASHI	0.8043	0.804666	4.12996	0.00015027	0.00352513
FBgn0053970	FBgn0053970	FBgn0053970	CG33970	-0.704507	-0.704633	5.81871	0.000152337	0.00356306
FBgn0030740	FBgn0030740	FBgn0030740	CG9917	0.807245	0.807457	5.26864	0.000155284	0.0036055
FBgn0034490	FBgn0034490	FBgn0034490	CG9864	1.0358	1.03677	3.42643	0.000155481	0.0036055
FBgn0023023	FBgn0023023	FBgn0023023	CRMP	-0.887617	-0.887644	8.45226	0.000155515	0.0036055
FBgn0264750	FBgn0264750	FBgn0264750	CG44008	-0.836133	-0.836382	5.02492	0.000157247	0.00363503
FBgn0031292	FBgn0031292	FBgn0031292	CG15824	1.12534	1.1266	3.44244	0.000160017	0.0036883
FBgn0053208	FBgn0053208	FBgn0053208	Mical	-0.601507	-0.601513	10.0169	0.000163125	0.00374904
FBgn0085399	FBgn0085399	FBgn0085399	CG34370	-0.837481	-0.837761	4.71189	0.000165117	0.00378385
FBgn0037007	FBgn0037007	FBgn0037007	CG5059	0.706928	0.707012	6.35371	0.000165762	0.00378769
FBgn0031011	FBgn0031011	FBgn0031011	CG8034	0.854423	0.854484	7.04605	0.000166878	0.00380224
FBgn0261873	FBgn0261873	FBgn0261873	sdt	0.58212	0.582124	10.4951	0.000167512	0.00380573
FBgn0050005	FBgn0050005	FBgn0050005	GstT2	0.775612	0.775892	4.6654	0.000168704	0.00382188
FBgn0035880	FBgn0035880	FBgn0035880	Culd	0.712137	0.712146	9.59185	0.000175036	0.00395263
FBgn0003380	FBgn0003380	FBgn0003380	Sh	0.859416	0.859417	12.9495	0.000175473	0.00395263
FBgn0032614	FBgn0032614	FBgn0032614	CG13284	0.697264	0.697296	8.18507	0.000179289	0.00401435
FBgn0011774	FBgn0011774	FBgn0011774	Irbp	0.84233	0.843148	3.23515	0.000179909	0.00401435
FBgn0036717	FBgn0036717	FBgn0036717	CG13731	-1.12716	-1.12903	2.91228	0.00018001	0.00401435
FBgn0037263	FBgn0037263	FBgn0037263	slx1	0.900783	0.902475	2.57724	0.000180238	0.00401435
FBgn0014391	FBgn0014391	FBgn0014391	sun	0.805378	0.805705	4.34819	0.00018137	0.00402824
FBgn0033669	FBgn0033669	FBgn0033669	PI31	0.829339	0.829619	4.78127	0.000184395	0.00408399
FBgn0028436	FBgn0028436	FBgn0028436	ECSIT	0.797014	0.797877	3.09432	0.000189626	0.00418814
FBgn0046114	FBgn0046114	FBgn0046114	Gclm	0.769165	0.769269	6.17727	0.000190832	0.00419424
FBgn0050373	FBgn0050373	FBgn0050373	CG30373	1.0085	1.01014	2.5306	0.00019096	0.00419424
FBgn0032393	FBgn0032393	FBgn0032393	Nfs1	0.821507	0.821914	4.09052	0.000192124	0.00420815
FBgn0013672	FBgn0013672	FBgn0013672	mt:ATPase6	-2.34336	-2.34456	5.64234	0.00019303	0.00421635
FBgn0051145	FBgn0051145	FBgn0051145	CG31145	0.750757	0.750771	8.91832	0.000196899	0.00428905
FBgn0264691	FBgn0264691	FBgn0264691	Lst8	0.912873	0.913926	3.07562	0.00020008	0.00433565
FBgn0262508	FBgn0262508	FBgn0262508	CG43078	-0.677177	-0.677184	9.85674	0.000200132	0.00433565
FBgn0264305	FBgn0264305	FBgn0264305	CG43783	-0.800756	-0.800835	6.7578	0.000200813	0.00433854
FBgn0016650	FBgn0016650	FBgn0016650	Lgr1	0.73528	0.735418	5.74678	0.000201625	0.00434424
FBgn0032420	FBgn0032420	FBgn0032420	CG6583	0.86956	0.870868	2.91431	0.000207241	0.00445316
FBgn0029980	FBgn0029980	FBgn0029980	CG10778	0.896104	0.896986	3.31013	0.000214948	0.00460533
FBgn0041184	FBgn0041184	FBgn0041184	Socs36E	0.760556	0.760607	6.97104	0.000215485	0.00460533
FBgn0036790	FBgn0036790	FBgn0036790	AstC-R1	-0.995321	-0.997066	2.47701	0.000217123	0.00462786
FBgn0001149	FBgn0001149	FBgn0001149	GstD1	0.772087	0.772131	7.21305	0.000218037	0.00463082
FBgn0013678	FBgn0013678	FBgn0013678	mt:Cyt-b	-1.70418	-1.70446	6.51452	0.000218743	0.00463082
FBgn0029895	FBgn0029895	FBgn0029895	CG14441	0.675831	0.675868	7.60053	0.000219013	0.00463082
FBgn0030099	FBgn0030099	FBgn0030099	CG12056	0.813671	0.814426	3.39016	0.000222247	0.0046867
FBgn0011566	FBgn0011566	FBgn0011566	Smyd3	0.804696	0.80519	3.79885	0.000231925	0.00487781
FBgn0017567	FBgn0017567	FBgn0017567	ND-23	0.746126	0.746364	4.75296	0.000234507	0.00491906
FBgn0036764	FBgn0036764	FBgn0036764	CG5535	1.14037	1.14159	3.35654	0.000236569	0.00494922
FBgn0037533	FBgn0037533	FBgn0037533	CD98hc	0.858113	0.858156	7.56286	0.000246229	0.00513777
FBgn0033188	FBgn0033188	FBgn0033188	Drat	0.666613	0.666699	6.41375	0.000248526	0.00517208
FBgn0000617	FBgn0000617	FBgn0000617	e(y)1	0.948427	0.949728	2.68667	0.000250577	0.00518582
FBgn0002723	FBgn0002723	FBgn0002723	Met	0.648498	0.648605	5.88827	0.000250603	0.00518582
FBgn0028984	FBgn0028984	FBgn0028984	Spn88Ea	1.02188	1.02236	4.1963	0.00025173	0.00518582
FBgn0022382	FBgn0022382	FBgn0022382	Pka-R2	-0.740138	-0.740157	8.59258	0.000251802	0.00518582
FBgn0008646	FBgn0008646	FBgn0008646	E5	-1.01484	-1.01696	2.49879	0.000254283	0.00522334
FBgn0029669	FBgn0029669	FBgn0029669	CG13021	-1.08303	-1.08622	2.07395	0.000256488	0.00525063
FBgn0052694	FBgn0052694	FBgn0052694	CG32694	-0.75145	-0.751561	6.30664	0.000256936	0.00525063
FBgn0261547	FBgn0261547	FBgn0261547	Exn	0.924201	0.924221	8.88063	0.000258317	0.00526529
FBgn0023215	FBgn0023215	FBgn0023215	Mnt	-0.595116	-0.595138	8.20739	0.000262164	0.00533
FBgn0000053	FBgn0000053	FBgn0000053	Gart	-0.71961	-0.719705	6.54543	0.000265451	0.00538302
FBgn0029783	FBgn0029783	FBgn0029783	Sirt4	1.01535	1.01634	3.36339	0.000269941	0.00546011
FBgn0259483	FBgn0259483	FBgn0259483	Mob4	0.814282	0.814504	5.15349	0.000276109	0.00557066
FBgn0284084	FBgn0284084	FBgn0284084	wg	-0.997695	-0.999642	2.71684	0.000276994	0.00557433
FBgn0034858	FBgn0034858	FBgn0034858	eIF2Bdelta	1.00032	1.0004	7.1114	0.00028144	0.00564947
FBgn0036992	FBgn0036992	FBgn0036992	Hpd	-0.824275	-0.824339	7.21846	0.000285364	0.00571376
FBgn0014133	FBgn0014133	FBgn0014133	bif	0.743031	0.743035	10.7955	0.000290274	0.00579743
FBgn0053329	FBgn0053329	FBgn0053329	Sp212	-0.792957	-0.793392	4.37779	0.000293389	0.00584493
FBgn0039282	FBgn0039282	FBgn0039282	Bili	-0.685605	-0.685653	7.05613	0.000294179	0.00584597
FBgn0085419	FBgn0085419	FBgn0085419	Rgk2	-0.806717	-0.80678	6.92024	0.000301504	0.00597656
FBgn0037672	FBgn0037672	FBgn0037672	sage	0.868584	0.868706	5.90667	0.00030558	0.00604225
FBgn0031652	FBgn0031652	FBgn0031652	jet	0.78814	0.788688	3.65754	0.000307123	0.00604811
FBgn0030272	FBgn0030272	FBgn0030272	CG15201	0.690902	0.691146	4.62904	0.000307402	0.00604811
FBgn0011225	FBgn0011225	FBgn0011225	jar	-0.677459	-0.677466	9.9722	0.000308834	0.00604948
FBgn0002183	FBgn0002183	FBgn0002183	dre4	0.685837	0.685911	6.41369	0.000309453	0.00604948
FBgn0000150	FBgn0000150	FBgn0000150	awd	0.745351	0.745465	5.91715	0.00030976	0.00604948
FBgn0039430	FBgn0039430	FBgn0039430	CG5455	-0.80575	-0.805761	9.38289	0.000313385	0.00606666
FBgn0038491	FBgn0038491	FBgn0038491	CG5292	0.997914	0.998944	3.54202	0.000313396	0.00606666
FBgn0030391	FBgn0030391	FBgn0030391	Rab40	0.721244	0.721542	4.59595	0.000313578	0.00606666
FBgn0032515	FBgn0032515	FBgn0032515	loqs	0.647916	0.647992	6.3125	0.000313701	0.00606666
FBgn0036661	FBgn0036661	FBgn0036661	CG9705	0.730878	0.731019	5.87611	0.000325728	0.00628393
FBgn0058160	FBgn0058160	FBgn0058160	CG40160	-0.70025	-0.700491	4.89895	0.000328087	0.00631408
FBgn0037535	FBgn0037535	FBgn0037535	PIG-H	0.913997	0.915311	2.88507	0.000332903	0.00639126
FBgn0040823	FBgn0040823	FBgn0040823	dpr6	-0.709849	-0.710015	5.48005	0.000336673	0.00643643
FBgn0010278	FBgn0010278	FBgn0010278	Ssrp	0.816721	0.817119	4.45405	0.00033688	0.00643643
FBgn0053191	FBgn0053191	FBgn0053191	CG33191	-0.729304	-0.729455	5.41878	0.00034393	0.00655534
FBgn0038127	FBgn0038127	FBgn0038127	CG8476	-0.899506	-0.900945	2.81	0.000351157	0.00667704
FBgn0058470	FBgn0058470	FBgn0058470	CG40470	-0.907523	-0.908347	3.49899	0.000356307	0.00675875
FBgn0004893	FBgn0004893	FBgn0004893	bowl	-0.829571	-0.829784	5.58441	0.000366687	0.00693906
FBgn0023001	FBgn0023001	FBgn0023001	melt	-0.810004	-0.810964	3.03546	0.000376278	0.00710359
FBgn0033224	FBgn0033224	FBgn0033224	Nop17l	0.732318	0.732362	7.45617	0.000378312	0.00711244
FBgn0038057	FBgn0038057	FBgn0038057	CG12267	0.875599	0.876412	3.86759	0.000378541	0.00711244
FBgn0032805	FBgn0032805	FBgn0032805	CG10337	1.04711	1.04908	3.70987	0.000383429	0.00718726
FBgn0039896	FBgn0039896	FBgn0039896	yellow-h	-0.894565	-0.896583	2.34757	0.000390985	0.0073116
FBgn0026593	FBgn0026593	FBgn0026593	CG5707	0.967944	0.968656	3.49842	0.00039397	0.00733161
FBgn0050263	FBgn0050263	FBgn0050263	stum	0.782774	0.783031	4.83781	0.000394145	0.00733161
FBgn0038951	FBgn0038951	FBgn0038951	CG5380	0.926674	0.928375	2.55725	0.000394829	0.00733161
FBgn0040005	FBgn0040005	FBgn0040005	CG17883	0.717928	0.718113	5.3265	0.000398258	0.00737801
FBgn0038806	FBgn0038806	FBgn0038806	CG5412	0.97863	0.980051	2.766	0.000402182	0.00739043
FBgn0004666	FBgn0004666	FBgn0004666	sim	-0.931001	-0.932274	2.95402	0.000402353	0.00739043
FBgn0266521	FBgn0266521	FBgn0266521	stai	-0.710846	-0.710889	7.32057	0.000402505	0.00739043
FBgn0285954	FBgn0285954	FBgn0285954	caz	-0.71851	-0.718633	5.93194	0.000403179	0.00739043
FBgn0036290	FBgn0036290	FBgn0036290	CG10638	0.725883	0.725995	5.92085	0.000403589	0.00739043
FBgn0039698	FBgn0039698	FBgn0039698	CG7789	0.837702	0.838595	3.21657	0.000406626	0.0074148
FBgn0032285	FBgn0032285	FBgn0032285	CG17108	-0.96913	-0.969244	6.32918	0.00040679	0.0074148
FBgn0010173	FBgn0010173	FBgn0010173	RpA-70	0.665878	0.666066	4.98434	0.000413711	0.00752366
FBgn0031310	FBgn0031310	FBgn0031310	Vps29	0.85282	0.853928	2.83711	0.000415234	0.00753407
FBgn0040237	FBgn0040237	FBgn0040237	bor	1.19661	1.1968	6.02023	0.000417328	0.00755478
FBgn0037084	FBgn0037084	FBgn0037084	Syx6	0.664497	0.664566	6.45333	0.000422626	0.00763325
FBgn0004587	FBgn0004587	FBgn0004587	B52	-0.647101	-0.647107	10.0807	0.000425284	0.00766381
FBgn0036446	FBgn0036446	FBgn0036446	CG9384	0.731462	0.731534	6.73419	0.00042849	0.00770407
FBgn0033905	FBgn0033905	FBgn0033905	CG18324	0.771345	0.772036	3.52869	0.000430031	0.00771429
FBgn0033174	FBgn0033174	FBgn0033174	CG11125	0.915035	0.916726	2.93299	0.000440381	0.00788213
FBgn0250907	FBgn0250907	FBgn0250907	Cht10	-0.988585	-0.990087	3.65435	0.000441872	0.00789101
FBgn0001296	FBgn0001296	FBgn0001296	kar	0.645232	0.645289	6.80584	0.000442999	0.00789334
FBgn0003091	FBgn0003091	FBgn0003091	Pkc53E	0.661042	0.661052	9.36133	0.000445943	0.00792799
FBgn0030336	FBgn0030336	FBgn0030336	CG1578	0.634891	0.63492	7.72025	0.000457837	0.00812123
FBgn0038236	FBgn0038236	FBgn0038236	Cyp313a1	-0.836839	-0.836937	6.3285	0.000462086	0.0081783
FBgn0037637	FBgn0037637	FBgn0037637	IscU	0.783551	0.783711	5.62918	0.000468814	0.00827024
FBgn0260995	FBgn0260995	FBgn0260995	dpr21	-0.726596	-0.72697	4.17144	0.000469367	0.00827024
FBgn0053978	FBgn0053978	FBgn0053978	CG33978	-0.690263	-0.690344	6.69465	0.000473864	0.00832918
FBgn0030092	FBgn0030092	FBgn0030092	fh	0.963719	0.965538	2.52858	0.000474813	0.00832918
FBgn0036106	FBgn0036106	FBgn0036106	CG6409	0.729623	0.729669	7.33724	0.000484012	0.00846091
FBgn0267861	FBgn0267861	FBgn0267861	Maf1	-0.713522	-0.713573	7.34801	0.000484456	0.00846091
FBgn0035922	FBgn0035922	FBgn0035922	Pex7	0.856077	0.856329	4.89334	0.000486116	0.00847124
FBgn0032666	FBgn0032666	FBgn0032666	CG5758	0.737757	0.737779	8.32545	0.00048977	0.0085162
FBgn0003268	FBgn0003268	FBgn0003268	rod	-0.790814	-0.791608	3.61234	0.000491047	0.00851972
FBgn0039802	FBgn0039802	FBgn0039802	dj-1beta	0.927395	0.928481	2.98257	0.000492824	0.00853189
FBgn0261380	FBgn0261380	FBgn0261380	mRpL37	-0.945941	-0.948669	1.98094	0.000495601	0.00856127
FBgn0031240	FBgn0031240	FBgn0031240	CG3345	1.01365	1.01581	2.75482	0.000497124	0.0085689
FBgn0031460	FBgn0031460	FBgn0031460	CG15399	-0.99682	-0.99838	2.85286	0.000500412	0.00860687
FBgn0004797	FBgn0004797	FBgn0004797	mdy	-0.729218	-0.729626	4.20995	0.000504243	0.00864444
FBgn0020545	FBgn0020545	FBgn0020545	kraken	0.766756	0.766962	5.11316	0.000504777	0.00864444
FBgn0026566	FBgn0026566	FBgn0026566	CG1307	0.790832	0.791762	3.18571	0.000507737	0.00867639
FBgn0001269	FBgn0001269	FBgn0001269	inv	-0.899436	-0.900245	3.84208	0.000510738	0.00869676
FBgn0026404	FBgn0026404	FBgn0026404	Dronc	0.786701	0.787251	4.05069	0.000511122	0.00869676
FBgn0002031	FBgn0002031	FBgn0002031	l(2)37Cc	0.786717	0.786968	4.83092	0.000524591	0.00890682
FBgn0262475	FBgn0262475	FBgn0262475	bru2	-0.627344	-0.627497	5.3404	0.000529514	0.00897119
FBgn0023170	FBgn0023170	FBgn0023170	RpL39	-1.34282	-1.3439	3.63562	0.000536376	0.00906808
FBgn0039298	FBgn0039298	FBgn0039298	to	-0.871911	-0.872925	3.07477	0.000559668	0.00944053
FBgn0034141	FBgn0034141	FBgn0034141	CG8311	0.727846	0.728316	3.75844	0.000560788	0.00944053
FBgn0035144	FBgn0035144	FBgn0035144	Kah	0.980017	0.980657	4.07137	0.000566269	0.00951259
FBgn0033101	FBgn0033101	FBgn0033101	CG9436	0.793392	0.793851	3.88538	0.000571062	0.00955706
FBgn0035537	FBgn0035537	FBgn0035537	CG11342	-1.08537	-1.08592	3.94654	0.000571441	0.00955706
FBgn0033926	FBgn0033926	FBgn0033926	Arc1	0.990719	0.990762	7.70671	0.000574258	0.00955706
FBgn0040733	FBgn0040733	FBgn0040733	CG15068	-1.22535	-1.22637	4.28632	0.00057482	0.00955706
FBgn0025836	FBgn0025836	FBgn0025836	RhoGAP1A	-0.556019	-0.556041	7.91003	0.000574942	0.00955706
FBgn0032821	FBgn0032821	FBgn0032821	CdGAPr	-0.857018	-0.85705	8.01671	0.00057643	0.00955941
FBgn0010194	FBgn0010194	FBgn0010194	Wnt5	0.703397	0.703876	3.90842	0.000579172	0.00955941
FBgn0034497	FBgn0034497	FBgn0034497	Mpcp1	1.14905	1.1493	5.20132	0.00057985	0.00955941
FBgn0039241	FBgn0039241	FBgn0039241	CG11089	-0.715247	-0.71536	6.19955	0.000579906	0.00955941
FBgn0004390	FBgn0004390	FBgn0004390	RasGAP1	-0.623956	-0.623988	7.53613	0.000586469	0.00964753
FBgn0000535	FBgn0000535	FBgn0000535	eag	0.706763	0.706767	10.9789	0.000588036	0.00965328
FBgn0023542	FBgn0023542	FBgn0023542	Nmd3	0.658121	0.658393	4.38102	0.000591539	0.00967693
FBgn0266084	FBgn0266084	FBgn0266084	Fhos	0.707467	0.707482	8.63916	0.000591917	0.00967693
FBgn0031473	FBgn0031473	FBgn0031473	CG3104	0.594502	0.59457	6.33226	0.000606617	0.00989684
FBgn0038043	FBgn0038043	FBgn0038043	CG17202	0.973925	0.975	3.21394	0.000618158	0.0100366
FBgn0264301	FBgn0264301	FBgn0264301	CG43779	-0.987302	-0.987607	5.16046	0.000618359	0.0100366
FBgn0033928	FBgn0033928	FBgn0033928	Arc2	0.917862	0.919489	2.80754	0.000619202	0.0100366
FBgn0000579	FBgn0000579	FBgn0000579	Eno	0.660856	0.660874	8.26682	0.000620969	0.0100366
FBgn0037617	FBgn0037617	FBgn0037617	nom	0.797563	0.798349	3.31318	0.000621513	0.0100366
FBgn0033760	FBgn0033760	FBgn0033760	CG8785	-0.88487	-0.886624	2.44926	0.000633374	0.0102074
FBgn0262614	FBgn0262614	FBgn0262614	pyd	0.927544	0.927548	11.2366	0.000640263	0.0102975
FBgn0069973	FBgn0069973	FBgn0069973	CG40485	0.705096	0.705267	5.41286	0.000641901	0.0103029
FBgn0262582	FBgn0262582	FBgn0262582	cic	-0.53639	-0.536397	9.56253	0.000648158	0.0103823
FBgn0003209	FBgn0003209	FBgn0003209	raw	-0.657879	-0.657899	8.36785	0.000655318	0.0104758
FBgn0262559	FBgn0262559	FBgn0262559	Mdh2	0.646445	0.646495	6.77542	0.000665221	0.0106127
FBgn0010741	FBgn0010741	FBgn0010741	Pfdn2	0.761033	0.761319	4.66569	0.000678565	0.0108039
FBgn0042175	FBgn0042175	FBgn0042175	CG18858	0.923225	0.925151	2.29344	0.000695716	0.0110548
FBgn0051121	FBgn0051121	FBgn0051121	CG31121	-0.691535	-0.691969	4.2181	0.000697224	0.0110566
FBgn0027791	FBgn0027791	FBgn0027791	O-fut2	0.903172	0.903735	4.14009	0.000700213	0.0110818
FBgn0037589	FBgn0037589	FBgn0037589	Obp85a	0.952279	0.953895	2.40704	0.000703015	0.011104
FBgn0037797	FBgn0037797	FBgn0037797	CG12420	1.00115	1.00256	3.06459	0.000707401	0.0111511
FBgn0037356	FBgn0037356	FBgn0037356	CG12170	0.787229	0.788055	3.09224	0.000713872	0.0112307
FBgn0039507	FBgn0039507	FBgn0039507	mrt	0.593129	0.593203	6.26738	0.00072291	0.0113504
FBgn0030891	FBgn0030891	FBgn0030891	Ada3	0.666594	0.66679	4.91436	0.000727417	0.0113975
FBgn0017429	FBgn0017429	FBgn0017429	CG5989	0.708059	0.708378	4.18438	0.000728787	0.0113975
FBgn0052076	FBgn0052076	FBgn0052076	Alg10	0.967808	0.969428	2.70323	0.000736866	0.0114801
FBgn0028970	FBgn0028970	FBgn0028970	betaggt-II	0.74639	0.746814	3.99194	0.000736961	0.0114801
FBgn0027081	FBgn0027081	FBgn0027081	ThrRS	0.845521	0.84562	6.29315	0.000739965	0.0115043
FBgn0031999	FBgn0031999	FBgn0031999	CG8419	0.797465	0.797583	6.0416	0.000742444	0.0115107
FBgn0032474	FBgn0032474	FBgn0032474	DnaJ-H	0.626781	0.6269	5.68138	0.000743284	0.0115107
FBgn0039044	FBgn0039044	FBgn0039044	p53	0.880624	0.881224	3.93992	0.00074691	0.0115443
FBgn0031191	FBgn0031191	FBgn0031191	Cp110	0.678261	0.67842	5.54521	0.000753952	0.0116111
FBgn0053293	FBgn0053293	FBgn0053293	CG33293	-0.822216	-0.822718	4.22311	0.000754156	0.0116111
FBgn0028331	FBgn0028331	FBgn0028331	l(1)G0289	0.576679	0.576692	8.66494	0.000765523	0.0117569
FBgn0035237	FBgn0035237	FBgn0035237	CG13917	-0.551508	-0.551516	9.41597	0.000766595	0.0117569
FBgn0033773	FBgn0033773	FBgn0033773	Mos	-1.29777	-1.30229	2.18732	0.000782378	0.0119678
FBgn0037011	FBgn0037011	FBgn0037011	CG4858	0.715015	0.715423	3.99283	0.000783363	0.0119678
FBgn0035160	FBgn0035160	FBgn0035160	hng3	0.889237	0.89128	2.30822	0.000798949	0.012177
FBgn0015399	FBgn0015399	FBgn0015399	kek1	0.606485	0.606534	6.87159	0.000802384	0.012177
FBgn0052451	FBgn0052451	FBgn0052451	SPoCk	-0.7157	-0.715708	9.68619	0.000803048	0.012177
FBgn0053193	FBgn0053193	FBgn0053193	sav	0.838022	0.838447	4.39424	0.000804972	0.012177
FBgn0000246	FBgn0000246	FBgn0000246	c(3)G	-0.890692	-0.892818	2.28649	0.000807649	0.012177
FBgn0003975	FBgn0003975	FBgn0003975	vg	1.22616	1.22706	4.39834	0.000808843	0.012177
FBgn0029994	FBgn0029994	FBgn0029994	Ldsdh1	0.704823	0.704953	5.61318	0.00080971	0.012177
FBgn0037635	FBgn0037635	FBgn0037635	CG9837	-0.854201	-0.854379	5.62471	0.000810607	0.012177
FBgn0000064	FBgn0000064	FBgn0000064	Ald1	0.598489	0.598497	9.29206	0.000810877	0.012177
FBgn0030719	FBgn0030719	FBgn0030719	eIF5	-1.11258	-1.11651	1.71869	0.000813903	0.0121993
FBgn0263027	FBgn0263027	FBgn0263027	CG43322	0.826858	0.828414	2.26438	0.000816506	0.0122125
FBgn0030872	FBgn0030872	FBgn0030872	Ucp4A	0.651507	0.651694	4.90336	0.00081786	0.0122125
FBgn0021872	FBgn0021872	FBgn0021872	Xbp1	0.731591	0.731613	8.31049	0.000824575	0.0122896
FBgn0051249	FBgn0051249	FBgn0051249	CG31249	0.834478	0.835616	3.1719	0.000835159	0.012424
FBgn0083970	FBgn0083970	FBgn0083970	CG34134	0.814243	0.815179	3.07432	0.000839987	0.0124587
FBgn0033405	FBgn0033405	FBgn0033405	CG13954	-0.766307	-0.766572	4.65221	0.000840636	0.0124587
FBgn0041588	FBgn0041588	FBgn0041588	eIF2D	0.711871	0.712186	4.35477	0.000845452	0.0125067
FBgn0085350	FBgn0085350	FBgn0085350	inaF-C	0.951173	0.951313	6.0298	0.000847295	0.0125106
FBgn0051199	FBgn0051199	FBgn0051199	CG31199	0.833042	0.833591	3.8663	0.000855999	0.0126156
FBgn0050295	FBgn0050295	FBgn0050295	Ipk1	0.711605	0.71166	7.64452	0.000858081	0.0126229
FBgn0032002	FBgn0032002	FBgn0032002	CG8353	0.888582	0.891314	1.81058	0.000860419	0.0126338
FBgn0030508	FBgn0030508	FBgn0030508	CG15760	0.665107	0.665198	6.00736	0.000863286	0.0126525
FBgn0262731	FBgn0262731	FBgn0262731	CG33941	1.03118	1.03324	2.69504	0.000871177	0.0127396
FBgn0051324	FBgn0051324	FBgn0051324	CG31324	-1.93387	-1.93406	6.73006	0.000874231	0.0127396
FBgn0037896	FBgn0037896	FBgn0037896	ninaG	0.775811	0.775902	6.36531	0.000874722	0.0127396
FBgn0004395	FBgn0004395	FBgn0004395	unk	0.584259	0.584298	7.32723	0.000878514	0.0127396
FBgn0033846	FBgn0033846	FBgn0033846	mip120	-0.769574	-0.769848	4.96519	0.000879445	0.0127396
FBgn0029502	FBgn0029502	FBgn0029502	Coq7	0.770391	0.770686	4.52126	0.0008799	0.0127396
FBgn0261016	FBgn0261016	FBgn0261016	clos	0.847473	0.849459	2.54225	0.00088082	0.0127396
FBgn0035916	FBgn0035916	FBgn0035916	GAPsec	1.48413	1.48424	7.0872	0.000882086	0.0127396
FBgn0050069	FBgn0050069	FBgn0050069	CG30069	-0.563535	-0.563549	8.71858	0.000886037	0.0127734
FBgn0038290	FBgn0038290	FBgn0038290	CG6912	0.691437	0.691495	6.8606	0.000893986	0.0128605
FBgn0035871	FBgn0035871	FBgn0035871	BI-1	0.695374	0.695597	4.94308	0.000895317	0.0128605
FBgn0031760	FBgn0031760	FBgn0031760	Tsp26A	0.662199	0.662389	5.12266	0.000903859	0.0129597
FBgn0033574	FBgn0033574	FBgn0033574	Spn47C	0.832919	0.834044	3.04697	0.000907161	0.0129821
FBgn0036126	FBgn0036126	FBgn0036126	Irbp18	0.814434	0.81527	3.38305	0.000910254	0.0129821
FBgn0036494	FBgn0036494	FBgn0036494	Toll-6	-0.632074	-0.632228	5.15105	0.000910337	0.0129821
FBgn0010241	FBgn0010241	FBgn0010241	Mdr50	-0.811297	-0.812718	3.20335	0.000925063	0.0131685
FBgn0000463	FBgn0000463	FBgn0000463	Dl	-0.799232	-0.799697	4.32182	0.000937573	0.013307
FBgn0039754	FBgn0039754	FBgn0039754	CG9747	0.610748	0.610935	4.7819	0.000938155	0.013307
FBgn0028833	FBgn0028833	FBgn0028833	Dak1	0.641545	0.641702	5.16532	0.000945884	0.0133927
FBgn0004832	FBgn0004832	FBgn0004832	Xpac	0.898729	0.900234	2.8962	0.000951201	0.013444
FBgn0031214	FBgn0031214	FBgn0031214	CG11374	0.723771	0.723895	5.96566	0.000955428	0.0134797
FBgn0030012	FBgn0030012	FBgn0030012	CG18262	0.866073	0.867515	2.58128	0.000959839	0.0135179
FBgn0035911	FBgn0035911	FBgn0035911	CG6638	0.74528	0.746351	3.00281	0.000969891	0.0136269
FBgn0034997	FBgn0034997	FBgn0034997	CG3376	0.538024	0.538054	7.38147	0.000971019	0.0136269
FBgn0021738	FBgn0021738	FBgn0021738	Crg-1	0.754179	0.754282	6.49737	0.000980932	0.0137417
FBgn0052177	FBgn0052177	FBgn0052177	Ndfip	0.604744	0.604852	5.6374	0.000986465	0.0137949
FBgn0011206	FBgn0011206	FBgn0011206	bol	-0.609635	-0.609645	8.96536	0.00100278	0.0139983
FBgn0037747	FBgn0037747	FBgn0037747	Naa80	0.688817	0.689059	4.85412	0.00101556	0.014137
FBgn0017566	FBgn0017566	FBgn0017566	ND-75	0.567978	0.568011	7.10567	0.00101628	0.014137
FBgn0263974	FBgn0263974	FBgn0263974	qin	1.07024	1.07042	5.85381	0.00102361	0.0142141
FBgn0037726	FBgn0037726	FBgn0037726	CG9492	-1.17673	-1.17771	4.20612	0.00103141	0.0142972
FBgn0039916	FBgn0039916	FBgn0039916	Ekar	0.606029	0.606053	7.94031	0.00104393	0.0144455
FBgn0264494	FBgn0264494	FBgn0264494	CG17646	0.605241	0.605296	6.77589	0.00105337	0.0145366
FBgn0025676	FBgn0025676	FBgn0025676	CkIIalpha-i3	-0.671706	-0.671927	5.22089	0.00105455	0.0145366
FBgn0028996	FBgn0028996	FBgn0028996	onecut	0.586264	0.586273	9.24498	0.001056	0.0145366
FBgn0030122	FBgn0030122	FBgn0030122	Aladin	0.759285	0.760528	2.605	0.00106338	0.0146128
FBgn0026088	FBgn0026088	FBgn0026088	CG14818	0.741736	0.742104	4.12623	0.0010705	0.0146851
FBgn0000121	FBgn0000121	FBgn0000121	Arr2	0.611366	0.611368	12.1187	0.00107403	0.0147081
FBgn0036278	FBgn0036278	FBgn0036278	CrzR	-0.822408	-0.823143	3.40536	0.00109326	0.0149457
FBgn0013323	FBgn0013323	FBgn0013323	Ptth	0.863635	0.866048	2.50744	0.00110046	0.0150181
FBgn0039800	FBgn0039800	FBgn0039800	Npc2g	0.632558	0.632822	4.35298	0.0011109	0.0151234
FBgn0052026	FBgn0052026	FBgn0052026	CG32026	-0.746027	-0.746351	4.35321	0.00111199	0.0151234
FBgn0266696	FBgn0266696	FBgn0266696	Svil	0.584371	0.584372	11.8657	0.00112181	0.0152309
FBgn0037408	FBgn0037408	FBgn0037408	NPFR	0.755995	0.756875	3.15488	0.00112464	0.0152432
FBgn0034876	FBgn0034876	FBgn0034876	wmd	0.586636	0.586835	4.93246	0.00113456	0.0153514
FBgn0001224	FBgn0001224	FBgn0001224	Hsp23	2.9787	2.98003	5.9542	0.00114639	0.0154668
FBgn0263873	FBgn0263873	FBgn0263873	sick	-0.578061	-0.578069	9.46968	0.00114699	0.0154668
FBgn0030658	FBgn0030658	FBgn0030658	CG7872	0.801527	0.802321	3.06422	0.00117038	0.0157555
FBgn0032713	FBgn0032713	FBgn0032713	Ugt36D1	0.705878	0.706283	4.14607	0.00117306	0.0157647
FBgn0263133	FBgn0263133	FBgn0263133	mEFG1	0.799788	0.800194	4.35133	0.00118527	0.0159019
FBgn0050493	FBgn0050493	FBgn0050493	Coq9	0.710659	0.711197	3.50921	0.00119312	0.0159801
FBgn0032336	FBgn0032336	FBgn0032336	AstC	-0.88209	-0.883659	2.27335	0.00120625	0.016122
FBgn0038271	FBgn0038271	FBgn0038271	UQCR-C1	0.629808	0.629837	7.46571	0.00120778	0.016122
FBgn0263258	FBgn0263258	FBgn0263258	chas	0.58211	0.582133	8.10108	0.00121338	0.0161695
FBgn0033391	FBgn0033391	FBgn0033391	CG8026	0.944443	0.945391	3.45435	0.00123348	0.0164031
FBgn0038332	FBgn0038332	FBgn0038332	CG6136	0.752491	0.753601	2.7468	0.00123504	0.0164031
FBgn0034495	FBgn0034495	FBgn0034495	CG11788	0.832886	0.834234	2.71373	0.00124103	0.0164426
FBgn0000117	FBgn0000117	FBgn0000117	arm	0.562771	0.562785	8.55332	0.00124403	0.0164426
FBgn0050033	FBgn0050033	FBgn0050033	CG30033	1.14954	1.15049	3.33719	0.00124424	0.0164426
FBgn0029914	FBgn0029914	FBgn0029914	CG4558	0.658886	0.659272	4.11068	0.001248	0.0164649
FBgn0039040	FBgn0039040	FBgn0039040	CG13833	0.872625	0.873392	3.30021	0.0012531	0.0165047
FBgn0040382	FBgn0040382	FBgn0040382	CG5273	0.754317	0.754351	7.70311	0.00126342	0.0166131
FBgn0039161	FBgn0039161	FBgn0039161	CG13606	-0.764472	-0.765125	3.52976	0.00127063	0.0166802
FBgn0052105	FBgn0052105	FBgn0052105	Lmx1a	-1.01802	-1.02063	2.24824	0.00127293	0.0166828
FBgn0026737	FBgn0026737	FBgn0026737	CG6171	0.801329	0.802116	3.3672	0.0012943	0.0169348
FBgn0015245	FBgn0015245	FBgn0015245	Hsp60A	0.725431	0.725483	6.88184	0.00131574	0.0171601
FBgn0034763	FBgn0034763	FBgn0034763	RYBP	0.600519	0.600645	5.58947	0.00131585	0.0171601
FBgn0039904	FBgn0039904	FBgn0039904	Hcf	-0.514388	-0.514406	8.10602	0.00131929	0.0171759
FBgn0011768	FBgn0011768	FBgn0011768	Fdh	0.859399	0.859644	4.77944	0.00132139	0.0171759
FBgn0024558	FBgn0024558	FBgn0024558	Dph5	0.834843	0.835851	3.13914	0.00133497	0.0173241
FBgn0019982	FBgn0019982	FBgn0019982	Gs1l	0.741798	0.741948	5.42042	0.00134179	0.0173841
FBgn0033457	FBgn0033457	FBgn0033457	Ntmt	0.948146	0.950037	2.29203	0.00135679	0.0175498
FBgn0085425	FBgn0085425	FBgn0085425	CG34396	1.22251	1.2229	4.40242	0.00136872	0.0176752
FBgn0003559	FBgn0003559	FBgn0003559	su(f)	-0.66186	-0.661907	7.17647	0.00138094	0.017804
FBgn0035917	FBgn0035917	FBgn0035917	Zasp66	0.750455	0.750526	7.14499	0.00138425	0.0178177
FBgn0032078	FBgn0032078	FBgn0032078	C1GalTA	0.626446	0.626826	4.1853	0.00138654	0.0178182
FBgn0263232	FBgn0263232	FBgn0263232	Nxf3	-0.627374	-0.62751	5.43366	0.00139209	0.0178607
FBgn0035422	FBgn0035422	FBgn0035422	RpL28	0.716421	0.716476	6.95238	0.00140413	0.017986
FBgn0034988	FBgn0034988	FBgn0034988	cN-IIIB	0.747499	0.748712	2.6193	0.00140682	0.0179914
FBgn0051697	FBgn0051697	FBgn0051697	CG31697	-0.80698	-0.807868	3.10109	0.00141941	0.018082
FBgn0038053	FBgn0038053	FBgn0038053	CG18549	0.666842	0.666942	5.93416	0.00142064	0.018082
FBgn0035915	FBgn0035915	FBgn0035915	S-Lap1	0.95378	0.953944	5.91668	0.00142111	0.018082
FBgn0265180	FBgn0265180	FBgn0265180	CG44245	0.689559	0.689644	6.47095	0.00142303	0.018082
FBgn0263594	FBgn0263594	FBgn0263594	lost	0.614351	0.61438	7.63387	0.00144433	0.0183233
FBgn0038868	FBgn0038868	FBgn0038868	CG5862	0.711661	0.712006	4.35119	0.00147096	0.0186314
FBgn0270926	FBgn0270926	FBgn0270926	AsnS	1.62959	1.63011	5.48566	0.00147436	0.0186446
FBgn0263846	FBgn0263846	FBgn0263846	CG43707	-0.632492	-0.632553	6.4594	0.0014874	0.0187797
FBgn0051122	FBgn0051122	FBgn0051122	CG31122	0.574645	0.574747	5.79136	0.00149712	0.0188426
FBgn0038583	FBgn0038583	FBgn0038583	CG7183	0.725043	0.725611	3.58295	0.00149714	0.0188426
FBgn0000157	FBgn0000157	FBgn0000157	Dll	-0.696331	-0.696685	4.29747	0.00151723	0.0190377
FBgn0031628	FBgn0031628	FBgn0031628	CG3294	0.700243	0.701041	3.1966	0.00151744	0.0190377
FBgn0039025	FBgn0039025	FBgn0039025	Usp12-46	-0.624553	-0.624597	7.10173	0.00152056	0.0190466
FBgn0037299	FBgn0037299	FBgn0037299	Vps37B	0.702212	0.702576	4.37241	0.00152676	0.0190941
FBgn0031267	FBgn0031267	FBgn0031267	Ipk2	0.840468	0.84248	2.44832	0.00153039	0.0191093
FBgn0040923	FBgn0040923	FBgn0040923	CG11368	1.21942	1.21966	5.12509	0.00153312	0.0191133
FBgn0035896	FBgn0035896	FBgn0035896	CG6983	0.655191	0.655283	5.97008	0.00153643	0.0191246
FBgn0035802	FBgn0035802	FBgn0035802	Pura	0.732321	0.732349	8.1645	0.00154941	0.0192448
FBgn0030096	FBgn0030096	FBgn0030096	Zpr1	0.810577	0.811446	3.18096	0.00155216	0.0192448
FBgn0034442	FBgn0034442	FBgn0034442	CG11257	0.845587	0.84684	2.67949	0.00155337	0.0192448
FBgn0039644	FBgn0039644	FBgn0039644	rdog	0.652439	0.652526	6.10688	0.00156406	0.0193471
FBgn0031882	FBgn0031882	FBgn0031882	Rab30	0.673224	0.673736	3.67858	0.00157339	0.0194321
FBgn0001226	FBgn0001226	FBgn0001226	Hsp27	2.687	2.68805	6.18202	0.00157616	0.019436
FBgn0019830	FBgn0019830	FBgn0019830	colt	0.623413	0.623566	5.13747	0.00160163	0.0197194
FBgn0016013	FBgn0016013	FBgn0016013	Faa	-0.738903	-0.739472	3.80153	0.00161409	0.019842
FBgn0033074	FBgn0033074	FBgn0033074	tomboy40	0.638699	0.639186	3.88149	0.0016381	0.0200904
FBgn0036381	FBgn0036381	FBgn0036381	CG8745	-0.826821	-0.826929	6.40023	0.00163936	0.0200904
FBgn0002626	FBgn0002626	FBgn0002626	RpL32	0.705976	0.706048	6.5677	0.00164704	0.0201534
FBgn0051320	FBgn0051320	FBgn0051320	HEATR2	-0.868783	-0.868831	7.59784	0.00165069	0.0201634
FBgn0262531	FBgn0262531	FBgn0262531	CG43085	0.830393	0.830768	4.44853	0.00165294	0.0201634
FBgn0264075	FBgn0264075	FBgn0264075	tgo	0.583015	0.58314	5.46836	0.001662	0.020221
FBgn0030963	FBgn0030963	FBgn0030963	CG7101	0.789724	0.790887	2.77828	0.00166371	0.020221
FBgn0266711	FBgn0266711	FBgn0266711	EloC	0.755544	0.755914	4.34439	0.00166532	0.020221
FBgn0261602	FBgn0261602	FBgn0261602	RpL8	0.693792	0.693818	7.9499	0.0016778	0.0203414
FBgn0005614	FBgn0005614	FBgn0005614	trpl	-0.612097	-0.612097	13.8212	0.00168289	0.0203719
FBgn0035833	FBgn0035833	FBgn0035833	CG7565	-0.69866	-0.698869	4.80587	0.0016923	0.0204546
FBgn0026056	FBgn0026056	FBgn0026056	Rlip	0.556171	0.556278	5.74328	0.00170973	0.0206338
FBgn0027066	FBgn0027066	FBgn0027066	Eb1	-0.716044	-0.716074	7.83474	0.00172284	0.0207605
FBgn0083977	FBgn0083977	FBgn0083977	CG34141	-0.667088	-0.667102	8.76161	0.00173689	0.0208692
FBgn0015288	FBgn0015288	FBgn0015288	RpL22	0.686344	0.68638	7.47275	0.00173713	0.0208692
FBgn0034915	FBgn0034915	FBgn0034915	eIF6	0.820399	0.820859	4.01403	0.00175048	0.0209701
FBgn0039767	FBgn0039767	FBgn0039767	CG2218	0.681864	0.68207	4.97276	0.00175081	0.0209701
FBgn0020018	FBgn0020018	FBgn0020018	Ppox	0.739243	0.740172	3.03792	0.00175804	0.0210248
FBgn0053143	FBgn0053143	FBgn0053143	CG33143	0.593731	0.593737	9.7802	0.0017719	0.0211588
FBgn0032643	FBgn0032643	FBgn0032643	GCS2beta	0.650436	0.650799	4.10081	0.00179229	0.02137
FBgn0034795	FBgn0034795	FBgn0034795	MED23	-0.728126	-0.728418	4.67723	0.00179828	0.0214092
FBgn0053172	FBgn0053172	FBgn0053172	CG33172	-0.845279	-0.846469	3.26718	0.00180875	0.0215016
FBgn0030605	FBgn0030605	FBgn0030605	ND-B18	0.651916	0.652203	4.27101	0.00186561	0.022125
FBgn0039406	FBgn0039406	FBgn0039406	RpL34a	0.8705	0.870827	4.68417	0.00186677	0.022125
FBgn0261804	FBgn0261804	FBgn0261804	CG42750	-0.653655	-0.653719	6.53398	0.00187242	0.0221588
FBgn0038876	FBgn0038876	FBgn0038876	Idi	0.726939	0.727612	3.32781	0.00187613	0.0221697
FBgn0035577	FBgn0035577	FBgn0035577	CG13708	0.937001	0.937933	3.75088	0.00188157	0.0221719
FBgn0030008	FBgn0030008	FBgn0030008	CG2129	0.709562	0.710223	3.20134	0.00188264	0.0221719
FBgn0043362	FBgn0043362	FBgn0043362	bchs	-0.607536	-0.607546	9.35093	0.00188471	0.0221719
FBgn0051642	FBgn0051642	FBgn0051642	CG31642	-0.683289	-0.683376	6.17165	0.00188778	0.0221751
FBgn0034938	FBgn0034938	FBgn0034938	CG3803	0.815906	0.816745	3.05796	0.00192487	0.0225774
FBgn0005616	FBgn0005616	FBgn0005616	msl-2	0.596808	0.5969	5.99938	0.00194975	0.0228188
GFP	GFP	NA	NA	-1.03908	-1.03916	7.04165	0.00195121	0.0228188
FBgn0003517	FBgn0003517	FBgn0003517	sta	0.67864	0.67867	7.73558	0.00196311	0.0229241
FBgn0031571	FBgn0031571	FBgn0031571	bark	-0.632718	-0.632792	6.81262	0.00197839	0.0230686
FBgn0037580	FBgn0037580	FBgn0037580	DppIII	0.639218	0.639348	5.60544	0.00198315	0.0230902
FBgn0051158	FBgn0051158	FBgn0051158	Efa6	-0.538825	-0.538828	11.0157	0.00200087	0.023175
FBgn0035186	FBgn0035186	FBgn0035186	CG13912	-1.02345	-1.02404	3.89574	0.00200356	0.023175
FBgn0035429	FBgn0035429	FBgn0035429	CG12017	-1.15007	-1.15203	3.38795	0.00200448	0.023175
FBgn0037328	FBgn0037328	FBgn0037328	RpL35A	0.656888	0.656947	6.7283	0.00200566	0.023175
FBgn0037090	FBgn0037090	FBgn0037090	Est-Q	-0.718656	-0.719464	3.05819	0.0020057	0.023175
FBgn0029093	FBgn0029093	FBgn0029093	cathD	0.677081	0.677174	6.16229	0.00200797	0.023175
FBgn0267792	FBgn0267792	FBgn0267792	rgr	0.874797	0.874824	8.18162	0.00202064	0.0232873
FBgn0040070	FBgn0040070	FBgn0040070	Trx-2	0.725092	0.725243	5.51352	0.00203243	0.023371
FBgn0024364	FBgn0024364	FBgn0024364	CG11417	0.700579	0.701164	3.57781	0.00203653	0.023371
FBgn0038248	FBgn0038248	FBgn0038248	CG7886	-0.895072	-0.897418	2.22929	0.00203674	0.023371
FBgn0032054	FBgn0032054	FBgn0032054	Uba4	0.852008	0.853868	2.21553	0.00204197	0.0233971
FBgn0010786	FBgn0010786	FBgn0010786	l(3)02640	0.598881	0.599021	5.39612	0.0020484	0.0234204
FBgn0037244	FBgn0037244	FBgn0037244	CG14647	0.715791	0.716246	4.0106	0.00204991	0.0234204
FBgn0010551	FBgn0010551	FBgn0010551	Phb2	1.01282	1.01294	6.38735	0.00206079	0.0235108
FBgn0052221	FBgn0052221	FBgn0052221	CG32221	0.71565	0.716612	2.89727	0.00207149	0.0235989
FBgn0027054	FBgn0027054	FBgn0027054	CSN4	0.684058	0.684556	3.75105	0.0020748	0.0236027
FBgn0028515	FBgn0028515	FBgn0028515	EndoGI	0.647308	0.647686	4.20422	0.00209047	0.0237469
FBgn0011661	FBgn0011661	FBgn0011661	Moe	0.779434	0.779448	9.1934	0.00209397	0.0237526
FBgn0267796	FBgn0267796	FBgn0267796	Tmc	-0.697713	-0.698652	2.96761	0.00209807	0.0237631
FBgn0015797	FBgn0015797	FBgn0015797	Rab6	0.549124	0.549269	5.246	0.00210089	0.0237631
FBgn0032781	FBgn0032781	FBgn0032781	RtcB	0.656952	0.657324	4.04244	0.00210565	0.023783
FBgn0266721	FBgn0266721	FBgn0266721	gammaSnap2	0.833122	0.834107	3.22659	0.00215196	0.0242715
FBgn0033665	FBgn0033665	FBgn0033665	Zip48C	0.655484	0.656003	3.74879	0.00217321	0.0244764
FBgn0036117	FBgn0036117	FBgn0036117	CG6321	-0.816409	-0.818414	2.15798	0.00218221	0.0245343
FBgn0041712	FBgn0041712	FBgn0041712	yellow-d	0.922998	0.923474	4.89434	0.00218454	0.0245343
FBgn0023541	FBgn0023541	FBgn0023541	Cyp4d14	0.81364	0.814817	2.76024	0.00220783	0.0247608
FBgn0037721	FBgn0037721	FBgn0037721	CG9427	0.717243	0.717591	4.43484	0.00221605	0.0248179
FBgn0037963	FBgn0037963	FBgn0037963	Cad87A	-0.578132	-0.578214	6.17927	0.00222192	0.0248485
FBgn0037004	FBgn0037004	FBgn0037004	CG17637	-0.765093	-0.765705	3.36592	0.00223988	0.0250141
FBgn0283439	FBgn0283439	FBgn0283439	CG46281	-0.857621	-0.859662	1.96677	0.00233607	0.0260517
FBgn0039026	FBgn0039026	FBgn0039026	CG7029	-0.631203	-0.63121	10.1548	0.00234419	0.0260915
FBgn0001145	FBgn0001145	FBgn0001145	Gs2	0.565133	0.565148	8.38872	0.00234623	0.0260915
FBgn0011638	FBgn0011638	FBgn0011638	La	0.696861	0.697131	4.4148	0.00236916	0.0262546
FBgn0000658	FBgn0000658	FBgn0000658	fj	-0.955357	-0.957474	2.4164	0.00236951	0.0262546
FBgn0014340	FBgn0014340	FBgn0014340	mof	0.670414	0.670759	4.15224	0.00237083	0.0262546
FBgn0004957	FBgn0004957	FBgn0004957	por	0.676003	0.67649	3.63448	0.00240803	0.0266294
FBgn0031036	FBgn0031036	FBgn0031036	CG14220	0.666996	0.667323	4.28159	0.00243481	0.0268624
FBgn0261041	FBgn0261041	FBgn0261041	stj	-0.528228	-0.528231	10.8674	0.00243588	0.0268624
FBgn0038474	FBgn0038474	FBgn0038474	mRpS11	0.861843	0.862531	3.83973	0.00244247	0.0268977
FBgn0039529	FBgn0039529	FBgn0039529	CG5612	0.874475	0.87489	4.20005	0.00244688	0.0269089
FBgn0002787	FBgn0002787	FBgn0002787	Rpn8	0.568034	0.568209	4.98522	0.00245218	0.0269298
FBgn0037880	FBgn0037880	FBgn0037880	CG17726	0.725918	0.726911	2.84824	0.00248876	0.0272827
FBgn0037913	FBgn0037913	FBgn0037913	fabp	-0.897303	-0.898223	3.36348	0.00249119	0.0272827
FBgn0015600	FBgn0015600	FBgn0015600	toc	-0.532063	-0.532068	10.1898	0.00250156	0.0273584
FBgn0016131	FBgn0016131	FBgn0016131	Cdk4	-0.74842	-0.749325	3.17464	0.0025104	0.0274173
FBgn0028411	FBgn0028411	FBgn0028411	Nxt1	0.784425	0.786369	1.82287	0.00258918	0.0282388
FBgn0031066	FBgn0031066	FBgn0031066	COX6B	0.609903	0.609987	5.90762	0.00260372	0.0282891
FBgn0004396	FBgn0004396	FBgn0004396	CrebA	-0.615134	-0.615232	6.21794	0.00260626	0.0282891
FBgn0034345	FBgn0034345	FBgn0034345	CG5174	-0.607307	-0.60733	8.13462	0.00260669	0.0282891
FBgn0035696	FBgn0035696	FBgn0035696	Best2	-0.583	-0.583143	5.35455	0.00260806	0.0282891
FBgn0052091	FBgn0052091	FBgn0052091	CG32091	-0.734102	-0.734966	3.12897	0.00261412	0.0283161
FBgn0033225	FBgn0033225	FBgn0033225	TTLL12	-0.783215	-0.783816	3.58622	0.00261975	0.0283383
FBgn0010388	FBgn0010388	FBgn0010388	Dro	-1.21304	-1.21591	2.71669	0.00262602	0.0283675
FBgn0040236	FBgn0040236	FBgn0040236	c11.1	0.609511	0.609525	8.69147	0.00263977	0.0284567
FBgn0037817	FBgn0037817	FBgn0037817	Cyp12e1	-0.742157	-0.742976	3.14	0.00264146	0.0284567
FBgn0031635	FBgn0031635	FBgn0031635	tank	0.665883	0.666054	5.18763	0.00264918	0.0285011
FBgn0005322	FBgn0005322	FBgn0005322	nmd	0.694457	0.695038	3.52141	0.00265542	0.028514
FBgn0031998	FBgn0031998	FBgn0031998	SLC5A11	0.79879	0.798847	7.09575	0.00265756	0.028514
FBgn0037723	FBgn0037723	FBgn0037723	SpdS	0.672695	0.673113	3.90002	0.00267202	0.0286172
FBgn0033960	FBgn0033960	FBgn0033960	CG10151	0.622034	0.622499	3.87287	0.0026744	0.0286172
FBgn0017579	FBgn0017579	FBgn0017579	RpL14	0.677952	0.678016	6.65359	0.00268445	0.028686
FBgn0263490	FBgn0263490	FBgn0263490	mld	0.53866	0.538668	9.28493	0.00269018	0.0287085
FBgn0039737	FBgn0039737	FBgn0039737	CG7920	0.650126	0.650157	7.3997	0.00271054	0.028887
FBgn0038739	FBgn0038739	FBgn0038739	CG4686	0.690197	0.690729	3.62442	0.00272127	0.0289623
FBgn0036889	FBgn0036889	FBgn0036889	CG14100	0.914248	0.916128	2.37458	0.00272936	0.0289798
FBgn0083953	FBgn0083953	FBgn0083953	CG34117	0.838691	0.840327	2.47958	0.00273022	0.0289798
FBgn0031114	FBgn0031114	FBgn0031114	cactin	0.791945	0.792337	4.38533	0.00273585	0.0290007
FBgn0038020	FBgn0038020	FBgn0038020	GstD9	0.692291	0.693262	2.95334	0.00274926	0.029104
FBgn0028993	FBgn0028993	FBgn0028993	scro	-0.716431	-0.716675	4.78083	0.00278101	0.0293455
FBgn0037739	FBgn0037739	FBgn0037739	CG12948	0.639875	0.640231	4.16568	0.00278227	0.0293455
FBgn0038588	FBgn0038588	FBgn0038588	CG7156	0.653006	0.653276	4.42736	0.00278318	0.0293455
FBgn0031948	FBgn0031948	FBgn0031948	CG7149	0.584867	0.584927	6.62555	0.00279108	0.0293897
FBgn0036516	FBgn0036516	FBgn0036516	CG7656	0.591235	0.591374	5.41956	0.0028028	0.029474
FBgn0036053	FBgn0036053	FBgn0036053	iPLA2-VIA	-0.571357	-0.571427	6.31819	0.00281014	0.0294924
FBgn0032818	FBgn0032818	FBgn0032818	CG10628	0.745733	0.746729	2.96419	0.00281199	0.0294924
FBgn0029932	FBgn0029932	FBgn0029932	CG4607	0.613778	0.613921	5.22754	0.00285085	0.0298604
FBgn0030838	FBgn0030838	FBgn0030838	CG5445	0.592245	0.592413	4.98525	0.00287323	0.0300552
FBgn0028579	FBgn0028579	FBgn0028579	phtf	-0.528886	-0.528998	5.5432	0.00288368	0.0301248
FBgn0052702	FBgn0052702	FBgn0052702	Cubn	-0.661021	-0.661048	7.96489	0.00289782	0.0302326
FBgn0033302	FBgn0033302	FBgn0033302	Cyp6a14	-0.821765	-0.823384	2.69287	0.00292018	0.0304042
FBgn0037686	FBgn0037686	FBgn0037686	RpL34b	0.687902	0.687974	6.48208	0.00292335	0.0304042
FBgn0267385	FBgn0267385	FBgn0267385	PyK	0.579713	0.579727	8.36164	0.00292576	0.0304042
FBgn0035517	FBgn0035517	FBgn0035517	CG1265	0.710283	0.711396	2.76311	0.0029633	0.0307539
FBgn0260812	FBgn0260812	FBgn0260812	inaF-D	0.952051	0.952216	5.88136	0.0029965	0.0310578
FBgn0028542	FBgn0028542	FBgn0028542	NimB4	-0.831721	-0.834389	1.72406	0.00305814	0.0316554
FBgn0029629	FBgn0029629	FBgn0029629	eIF3g1	0.715049	0.715214	5.23204	0.00307321	0.0317678
FBgn0030114	FBgn0030114	FBgn0030114	CG17754	0.542654	0.542743	5.85647	0.00307702	0.0317678
FBgn0039857	FBgn0039857	FBgn0039857	RpL6	0.64549	0.645521	7.66237	0.00309883	0.0319514
FBgn0052698	FBgn0052698	FBgn0052698	CARPB	-0.600277	-0.60039	5.82429	0.00310684	0.031967
FBgn0286781	FBgn0286781	FBgn0286781	cass	0.554381	0.554396	8.49273	0.00310841	0.031967
FBgn0030792	FBgn0030792	FBgn0030792	CG4789	0.77161	0.772128	3.84409	0.00314401	0.0322913
FBgn0016930	FBgn0016930	FBgn0016930	Dyrk2	-0.713435	-0.713447	9.27225	0.00315471	0.0323593
FBgn0000042	FBgn0000042	FBgn0000042	Act5C	0.617636	0.61765	8.83589	0.00316137	0.0323857
FBgn0030673	FBgn0030673	FBgn0030673	CG15601	0.761846	0.76335	2.35943	0.00317251	0.0324233
FBgn0031735	FBgn0031735	FBgn0031735	CG11029	-0.765913	-0.76673	3.27355	0.00317322	0.0324233
FBgn0032518	FBgn0032518	FBgn0032518	RpL24	0.689621	0.689665	7.12337	0.00319728	0.0325939
FBgn0034707	FBgn0034707	FBgn0034707	MED16	0.65878	0.659544	3.16971	0.00319814	0.0325939
FBgn0033153	FBgn0033153	FBgn0033153	Gadd45	1.00104	1.00196	3.72035	0.00320359	0.0326075
FBgn0015949	FBgn0015949	FBgn0015949	hrg	-0.558776	-0.558834	6.46577	0.00320985	0.0326235
FBgn0051549	FBgn0051549	FBgn0051549	CG31549	0.659156	0.65997	2.96936	0.00321338	0.0326235
FBgn0000490	FBgn0000490	FBgn0000490	dpp	-0.583395	-0.583521	5.54393	0.00322667	0.0327165
FBgn0023177	FBgn0023177	FBgn0023177	Pp4-19C	0.656347	0.656646	4.42769	0.00323997	0.0328094
FBgn0022800	FBgn0022800	FBgn0022800	Cad96Ca	-0.651684	-0.651961	4.6286	0.00325151	0.0328466
FBgn0010329	FBgn0010329	FBgn0010329	Tbh	-0.670021	-0.670487	3.62952	0.00325193	0.0328466
FBgn0043783	FBgn0043783	FBgn0043783	CG32444	0.681122	0.68157	3.77805	0.00325711	0.0328571
FBgn0034286	FBgn0034286	FBgn0034286	dpr13	-0.694378	-0.694668	4.49761	0.00327076	0.0329164
FBgn0030511	FBgn0030511	FBgn0030511	CG11158	0.656463	0.657128	3.28489	0.00327129	0.0329164
FBgn0262035	FBgn0262035	FBgn0262035	CG42846	-0.911147	-0.914148	1.52301	0.00332784	0.0334429
FBgn0004584	FBgn0004584	FBgn0004584	Rrp1	0.705889	0.707009	2.96881	0.00338339	0.0339424
FBgn0039601	FBgn0039601	FBgn0039601	CG1523	0.64224	0.642637	3.92459	0.00338611	0.0339424
FBgn0022153	FBgn0022153	FBgn0022153	l(2)k05819	0.993138	0.993151	9.75541	0.00341791	0.0341025
FBgn0058045	FBgn0058045	FBgn0058045	CG40045	0.568073	0.56818	5.69333	0.00341803	0.0341025
FBgn0037024	FBgn0037024	FBgn0037024	tzn	0.606672	0.606953	4.38522	0.00341866	0.0341025
FBgn0026086	FBgn0026086	FBgn0026086	Adar	-0.535079	-0.535087	9.45686	0.00341928	0.0341025
FBgn0033232	FBgn0033232	FBgn0033232	CG12159	0.696253	0.697203	2.88217	0.00344051	0.0342536
FBgn0004102	FBgn0004102	FBgn0004102	oc	0.553769	0.553785	8.33498	0.00344455	0.0342536
FBgn0026751	FBgn0026751	FBgn0026751	XRCC1	0.64353	0.643748	4.97198	0.0034474	0.0342536
FBgn0052815	FBgn0052815	FBgn0052815	CG32815	-0.576939	-0.577061	5.50074	0.00355164	0.0352453
FBgn0037203	FBgn0037203	FBgn0037203	slif	-0.629354	-0.629893	3.45709	0.00357033	0.0353864
FBgn0263239	FBgn0263239	FBgn0263239	dar1	-0.772243	-0.772716	3.84737	0.00357939	0.0354319
FBgn0037819	FBgn0037819	FBgn0037819	CG14688	0.743638	0.744116	3.64453	0.00360313	0.0356092
FBgn0039712	FBgn0039712	FBgn0039712	CG15514	0.602343	0.602673	4.04574	0.00360628	0.0356092
FBgn0035993	FBgn0035993	FBgn0035993	Nf-YA	0.623493	0.623674	5.02702	0.0036241	0.0357407
FBgn0000810	FBgn0000810	FBgn0000810	fs(1)K10	0.605029	0.605238	4.77556	0.00364709	0.0359227
FBgn0053189	FBgn0053189	FBgn0053189	CG33189	-0.618172	-0.618309	5.41589	0.00366648	0.0360689
FBgn0031190	FBgn0031190	FBgn0031190	CG12576	0.539819	0.539913	5.79275	0.0036966	0.036305
FBgn0051301	FBgn0051301	FBgn0051301	CG31301	0.668675	0.669169	3.75352	0.00369964	0.036305
FBgn0027493	FBgn0027493	FBgn0027493	AdSS	0.61703	0.617088	6.59816	0.00371165	0.0363778
FBgn0010198	FBgn0010198	FBgn0010198	RpS15Aa	0.76785	0.767896	7.46221	0.00372339	0.0364479
FBgn0033199	FBgn0033199	FBgn0033199	CG17985	0.556409	0.556659	4.46842	0.00372988	0.0364664
FBgn0051119	FBgn0051119	FBgn0051119	HDAC11	0.690965	0.692102	2.69465	0.00374599	0.0365788
FBgn0066292	FBgn0066292	FBgn0066292	CheB42c	-0.659664	-0.660227	3.65799	0.00375666	0.036599
FBgn0029137	FBgn0029137	FBgn0029137	Patsas	0.629488	0.629865	3.84842	0.00376115	0.036599
FBgn0051352	FBgn0051352	FBgn0051352	Unc-115a	-0.59293	-0.592962	7.41692	0.00376191	0.036599
FBgn0082582	FBgn0082582	FBgn0082582	tmod	0.561228	0.561236	9.42965	0.00378022	0.0367321
FBgn0261387	FBgn0261387	FBgn0261387	CG17528	-0.542681	-0.542768	5.98296	0.00379638	0.0368439
FBgn0001078	FBgn0001078	FBgn0001078	ftz-f1	0.560411	0.560449	7.28004	0.00381057	0.0369162
FBgn0032814	FBgn0032814	FBgn0032814	CG10366	0.654678	0.654992	4.22252	0.00381314	0.0369162
FBgn0260499	FBgn0260499	FBgn0260499	qvr	0.623761	0.623767	10.0228	0.00385078	0.0372351
FBgn0264330	FBgn0264330	FBgn0264330	CG43789	0.642382	0.642762	4.25989	0.00386192	0.0372974
FBgn0260858	FBgn0260858	FBgn0260858	Ykt6	0.591452	0.59187	3.77371	0.003893	0.0375518
FBgn0052103	FBgn0052103	FBgn0052103	SCaMC	0.542508	0.542525	8.26833	0.00390327	0.0376051
FBgn0052278	FBgn0052278	FBgn0052278	CG32278	0.632511	0.633073	3.25337	0.00396225	0.0381271
FBgn0027453	FBgn0027453	FBgn0027453	Dnz1	0.560616	0.560676	6.42297	0.00397354	0.0381604
FBgn0032910	FBgn0032910	FBgn0032910	CG9265	0.570164	0.570297	5.46767	0.00397846	0.0381604
FBgn0016123	FBgn0016123	FBgn0016123	Alp4	0.723119	0.723484	4.13535	0.00398121	0.0381604
FBgn0053182	FBgn0053182	FBgn0053182	Kdm4B	-0.541066	-0.541137	6.12523	0.00398497	0.0381604
FBgn0031313	FBgn0031313	FBgn0031313	CG5080	0.686734	0.686888	5.14789	0.00400297	0.0382865
FBgn0036334	FBgn0036334	FBgn0036334	CG11267	0.789276	0.78974	3.79754	0.00401346	0.0383406
FBgn0038952	FBgn0038952	FBgn0038952	CG7069	0.979823	0.980308	4.48613	0.0040371	0.03852
FBgn0031865	FBgn0031865	FBgn0031865	Nha1	-0.954392	-0.956509	2.43601	0.00405833	0.038676
FBgn0032907	FBgn0032907	FBgn0032907	CG9272	0.726414	0.72731	2.96369	0.00406814	0.038723
FBgn0036493	FBgn0036493	FBgn0036493	CG7255	-0.631793	-0.632437	3.60469	0.00407813	0.0387716
FBgn0035246	FBgn0035246	FBgn0035246	CG13928	0.601039	0.601081	7.04149	0.00409034	0.0388411
FBgn0023512	FBgn0023512	FBgn0023512	eIF2Bepsilon	0.711817	0.711994	5.20868	0.00414534	0.0392714
FBgn0001085	FBgn0001085	FBgn0001085	fz	-0.548177	-0.548369	4.65908	0.00414557	0.0392714
FBgn0020767	FBgn0020767	FBgn0020767	Spred	-0.531571	-0.531599	7.4061	0.00415131	0.0392728
FBgn0039764	FBgn0039764	FBgn0039764	CG15535	0.675555	0.676399	2.92561	0.00415562	0.0392728
FBgn0025702	FBgn0025702	FBgn0025702	Srpk79D	0.515234	0.515267	7.41529	0.00416192	0.0392855
FBgn0260817	FBgn0260817	FBgn0260817	gkt	0.574328	0.57462	4.27615	0.0041918	0.0395205
FBgn0003204	FBgn0003204	FBgn0003204	ras	0.57565	0.575755	5.70926	0.00423179	0.0398502
FBgn0029756	FBgn0029756	FBgn0029756	CG3309	0.594833	0.59509	4.50661	0.00425454	0.0400106
FBgn0050089	FBgn0050089	FBgn0050089	CG30089	0.592079	0.592124	6.78309	0.00425892	0.0400106
FBgn0038968	FBgn0038968	FBgn0038968	CG12499	-0.622608	-0.62291	4.29569	0.00428326	0.0401208
FBgn0033995	FBgn0033995	FBgn0033995	GPHR	-0.686075	-0.687231	2.65037	0.00428689	0.0401208
FBgn0261446	FBgn0261446	FBgn0261446	CG13377	-0.626529	-0.627081	3.66205	0.0042878	0.0401208
FBgn0250869	FBgn0250869	FBgn0250869	CG42240	0.629794	0.629917	5.64483	0.00429088	0.0401208
FBgn0030160	FBgn0030160	FBgn0030160	CG9691	0.530979	0.531071	5.50916	0.00430894	0.0402375
FBgn0261648	FBgn0261648	FBgn0261648	salm	-0.662559	-0.662949	4.13672	0.00431351	0.0402375
FBgn0263738	FBgn0263738	FBgn0263738	Ada2a	-0.687162	-0.687488	4.15487	0.00432225	0.0402716
FBgn0004652	FBgn0004652	FBgn0004652	fru	0.852202	0.852219	9.11852	0.00432743	0.0402726
FBgn0034081	FBgn0034081	FBgn0034081	CG10731	-0.835059	-0.83823	1.29963	0.00434093	0.0403508
FBgn0033963	FBgn0033963	FBgn0033963	CG12857	-1.02126	-1.02283	2.59122	0.0043529	0.0404147
FBgn0000221	FBgn0000221	FBgn0000221	brn	0.835274	0.837104	2.20847	0.00436446	0.0404746
FBgn0037290	FBgn0037290	FBgn0037290	CG1124	0.571614	0.571801	4.91135	0.00438142	0.0405844
FBgn0011288	FBgn0011288	FBgn0011288	Snap25	-0.585709	-0.585729	8.19405	0.00440295	0.0406703
FBgn0051163	FBgn0051163	FBgn0051163	SKIP	-0.569142	-0.569203	6.54105	0.00440546	0.0406703
FBgn0011741	FBgn0011741	FBgn0011741	Arp6	0.756955	0.757727	3.48378	0.00440608	0.0406703
FBgn0259738	FBgn0259738	FBgn0259738	CG42392	-0.585433	-0.585534	5.91873	0.00441197	0.0406774
FBgn0036090	FBgn0036090	FBgn0036090	CG8009	0.714211	0.715575	2.34803	0.0044427	0.0409131
FBgn0265042	FBgn0265042	FBgn0265042	Irk1	-0.835544	-0.836785	2.84387	0.00445464	0.0409755
FBgn0036015	FBgn0036015	FBgn0036015	CG3088	0.758445	0.758524	6.27872	0.00449441	0.0412483
FBgn0264895	FBgn0264895	FBgn0264895	RapGAP1	-0.579508	-0.579569	6.62673	0.0044947	0.0412483
FBgn0032656	FBgn0032656	FBgn0032656	CG5674	0.526819	0.52688	6.41519	0.00451015	0.0413422
FBgn0035028	FBgn0035028	FBgn0035028	Start1	-0.536245	-0.536409	4.93956	0.00453882	0.0415414
FBgn0030914	FBgn0030914	FBgn0030914	CG6106	-0.734793	-0.73634	2.31203	0.00454555	0.0415414
FBgn0050052	FBgn0050052	FBgn0050052	Obp49a	0.893626	0.893791	5.46789	0.00454761	0.0415414
FBgn0026192	FBgn0026192	FBgn0026192	par-6	0.582242	0.582365	5.54771	0.00455485	0.0415597
FBgn0002773	FBgn0002773	FBgn0002773	Mlc2	0.874261	0.874314	7.04354	0.00459918	0.041916
FBgn0035047	FBgn0035047	FBgn0035047	Pof	0.625304	0.625764	3.76458	0.00460846	0.0419523
FBgn0285950	FBgn0285950	FBgn0285950	RpL19	0.615726	0.615765	7.22269	0.0046194	0.0419994
FBgn0005642	FBgn0005642	FBgn0005642	wdn	0.593269	0.593401	5.40207	0.00462422	0.0419994
FBgn0031771	FBgn0031771	FBgn0031771	ND-51	0.584978	0.585015	6.95902	0.00463239	0.0420254
FBgn0003295	FBgn0003295	FBgn0003295	ru	-0.862364	-0.862637	4.82611	0.00466921	0.042311
FBgn0010611	FBgn0010611	FBgn0010611	Hmgs	0.595901	0.596023	5.43629	0.0047195	0.0427179
FBgn0033889	FBgn0033889	FBgn0033889	CG6701	-0.614423	-0.614579	5.37816	0.00473057	0.0427693
FBgn0033392	FBgn0033392	FBgn0033392	CG8027	0.832133	0.832761	3.88084	0.00476824	0.0430608
FBgn0035639	FBgn0035639	FBgn0035639	kri	0.677021	0.677558	3.54685	0.00478018	0.0431195
FBgn0262570	FBgn0262570	FBgn0262570	CG43110	-0.914869	-0.915622	4.30409	0.0047857	0.0431203
FBgn0286222	FBgn0286222	FBgn0286222	Fum1	0.547144	0.547222	5.99125	0.00480388	0.0432349
FBgn0266449	FBgn0266449	FBgn0266449	Kr-h2	0.576784	0.576955	4.87934	0.00481756	0.0433089
FBgn0029755	FBgn0029755	FBgn0029755	Sas10	0.622045	0.622649	3.25884	0.00482683	0.043313
FBgn0052755	FBgn0052755	FBgn0052755	CG32755	-0.82252	-0.824075	2.55299	0.00482894	0.043313
FBgn0034948	FBgn0034948	FBgn0034948	PPP1R15	0.595147	0.595243	5.7733	0.00484786	0.0434335
FBgn0085428	FBgn0085428	FBgn0085428	Nox	-0.929484	-0.931493	2.71793	0.00486106	0.0435027
FBgn0032202	FBgn0032202	FBgn0032202	REPTOR-BP	-0.841215	-0.842653	2.60956	0.00489322	0.0437191
FBgn0032897	FBgn0032897	FBgn0032897	CG9336	0.54504	0.545103	6.35403	0.00489627	0.0437191
FBgn0020764	FBgn0020764	FBgn0020764	Alas	0.604879	0.605001	5.45007	0.0049031	0.0437308
FBgn0085376	FBgn0085376	FBgn0085376	CG34347	-0.55978	-0.559886	5.67072	0.00492496	0.0438764
FBgn0031835	FBgn0031835	FBgn0031835	CG11319	-0.596348	-0.596385	7.34115	0.00493348	0.043903
FBgn0035023	FBgn0035023	FBgn0035023	ITP	-0.576243	-0.576415	5.02504	0.00494193	0.0439289
FBgn0030053	FBgn0030053	FBgn0030053	CG12081	0.604193	0.60459	3.66334	0.00495086	0.043959
FBgn0026376	FBgn0026376	FBgn0026376	Rgl	-0.621406	-0.621444	7.33776	0.00495723	0.0439663
FBgn0034315	FBgn0034315	FBgn0034315	CG5721	0.607959	0.608307	3.99952	0.00497008	0.0440148
FBgn0061197	FBgn0061197	FBgn0061197	salto	0.655228	0.655779	3.59545	0.0049738	0.0440148
FBgn0030648	FBgn0030648	FBgn0030648	CG6340	0.483507	0.483565	6.32417	0.00498873	0.0440977
FBgn0035505	FBgn0035505	FBgn0035505	Teh2	0.49867	0.498681	8.78761	0.00503975	0.044499
FBgn0013432	FBgn0013432	FBgn0013432	bcn92	0.639743	0.640377	3.48931	0.00505723	0.0446038
FBgn0265274	FBgn0265274	FBgn0265274	Inx3	0.570084	0.570226	5.25547	0.00507691	0.0447275
FBgn0024913	FBgn0024913	FBgn0024913	Actbeta	0.546055	0.546109	6.62825	0.00509805	0.0448639
FBgn0261871	FBgn0261871	FBgn0261871	dpr2	-0.733633	-0.734385	3.25584	0.0051358	0.045146
FBgn0039008	FBgn0039008	FBgn0039008	CG6972	0.927176	0.928652	2.7313	0.00515859	0.0452494
FBgn0286075	FBgn0286075	FBgn0286075	DNAlig3	0.611216	0.611291	6.21363	0.00516374	0.0452494
FBgn0031777	FBgn0031777	FBgn0031777	CG9154	0.665335	0.666415	2.691	0.00516467	0.0452494
FBgn0263120	FBgn0263120	FBgn0263120	Acsl	-0.717444	-0.717465	8.51027	0.00518712	0.0453959
FBgn0010622	FBgn0010622	FBgn0010622	DCTN3-p24	0.674372	0.674738	4.19266	0.00519613	0.0454246
FBgn0051036	FBgn0051036	FBgn0051036	CG31036	0.672937	0.673057	5.97989	0.00522131	0.0455945
FBgn0038774	FBgn0038774	FBgn0038774	CG5023	0.937149	0.9376	4.03885	0.00523294	0.0456457
FBgn0039084	FBgn0039084	FBgn0039084	CG10175	-0.684996	-0.685662	3.22414	0.00524638	0.0456521
FBgn0035283	FBgn0035283	FBgn0035283	CG12024	0.623618	0.62386	4.59195	0.0052471	0.0456521
FBgn0001084	FBgn0001084	FBgn0001084	fy	0.673666	0.67481	2.44368	0.0052549	0.0456521
FBgn0035532	FBgn0035532	FBgn0035532	CG15014	0.846951	0.848531	2.42878	0.00525679	0.0456521
FBgn0000100	FBgn0000100	FBgn0000100	RpLP0	0.595555	0.59558	7.74238	0.00526245	0.0456521
FBgn0002789	FBgn0002789	FBgn0002789	Mp20	0.950361	0.95051	5.93309	0.00528212	0.0457726
FBgn0000173	FBgn0000173	FBgn0000173	ben	0.570551	0.570704	5.15564	0.00531062	0.0459362
FBgn0010395	FBgn0010395	FBgn0010395	Itgbn	-0.986931	-0.988616	3.42379	0.00531259	0.0459362
FBgn0038893	FBgn0038893	FBgn0038893	Archease	0.670206	0.670736	3.5702	0.00532099	0.0459587
FBgn0015277	FBgn0015277	FBgn0015277	Pi3K59F	0.516102	0.516219	5.23846	0.00533124	0.0459972
FBgn0032651	FBgn0032651	FBgn0032651	Oli	-0.785172	-0.78676	2.40169	0.00534419	0.0460588
FBgn0261053	FBgn0261053	FBgn0261053	Cad86C	-0.572179	-0.572384	4.7898	0.00538912	0.0463956
FBgn0037248	FBgn0037248	FBgn0037248	srl	-0.744467	-0.744888	4.39725	0.0054213	0.046622
FBgn0000567	FBgn0000567	FBgn0000567	Eip74EF	0.542823	0.542837	8.65148	0.00542857	0.046634
FBgn0033190	FBgn0033190	FBgn0033190	Gpo2	0.676353	0.676604	4.72474	0.00547493	0.0469813
FBgn0086698	FBgn0086698	FBgn0086698	frtz	0.658449	0.65855	5.84635	0.00550785	0.0471385
FBgn0014930	FBgn0014930	FBgn0014930	CG2846	0.60292	0.603335	3.79909	0.0055164	0.0471385
FBgn0034135	FBgn0034135	FBgn0034135	Syn2	0.575904	0.57606	5.47907	0.00551758	0.0471385
FBgn0284245	FBgn0284245	FBgn0284245	eEF1alpha1	0.575643	0.575647	10.1751	0.00552081	0.0471385
FBgn0033400	FBgn0033400	FBgn0033400	CG2063	0.613605	0.614203	3.47361	0.0055235	0.0471385
FBgn0037475	FBgn0037475	FBgn0037475	Fer1	-0.736815	-0.738404	2.07675	0.00552892	0.0471385
FBgn0052485	FBgn0052485	FBgn0052485	CG32485	0.613352	0.613657	4.19643	0.00557603	0.0474891
FBgn0026372	FBgn0026372	FBgn0026372	RpL23A	0.667735	0.667766	7.68535	0.00560518	0.0475473
FBgn0039886	FBgn0039886	FBgn0039886	CG2003	-1.02418	-1.02598	2.95456	0.00561126	0.0475473
FBgn0035513	FBgn0035513	FBgn0035513	Cpr64Ad	-0.626216	-0.626965	3.19432	0.00561207	0.0475473
FBgn0015222	FBgn0015222	FBgn0015222	Fer1HCH	0.582335	0.582387	6.64623	0.00561282	0.0475473
FBgn0005593	FBgn0005593	FBgn0005593	RpL7	0.592341	0.592384	6.94551	0.00561285	0.0475473
FBgn0037051	FBgn0037051	FBgn0037051	CG10565	0.582126	0.582241	5.49	0.00563511	0.0476849
FBgn0262719	FBgn0262719	FBgn0262719	CG43163	-0.645271	-0.645517	4.6931	0.0056483	0.0477456
FBgn0026409	FBgn0026409	FBgn0026409	Mpcp2	0.542236	0.542255	7.76851	0.00567327	0.0478874
FBgn0032001	FBgn0032001	FBgn0032001	CG8360	0.607453	0.608037	3.29044	0.00567743	0.0478874
FBgn0031099	FBgn0031099	FBgn0031099	CG17065	0.562007	0.562129	5.44472	0.0056832	0.0478874
FBgn0019940	FBgn0019940	FBgn0019940	Rh6	0.561764	0.561819	6.57094	0.00569554	0.0479324
FBgn0037298	FBgn0037298	FBgn0037298	Sccpdh1	0.54085	0.540903	6.43333	0.00570063	0.0479324
FBgn0052843	FBgn0052843	FBgn0052843	Dh31-R	-0.601543	-0.601754	4.60425	0.00570985	0.0479591
FBgn0259211	FBgn0259211	FBgn0259211	grh	-0.507548	-0.507593	6.91352	0.00575383	0.0482708
FBgn0040235	FBgn0040235	FBgn0040235	c12.1	0.691301	0.692049	3.1301	0.00575913	0.0482708
FBgn0042712	FBgn0042712	FBgn0042712	HBS1	0.60372	0.603885	5.07947	0.0058397	0.0488944
FBgn0032793	FBgn0032793	FBgn0032793	CG10189	0.694196	0.694851	3.01066	0.00584954	0.0489251
FBgn0087007	FBgn0087007	FBgn0087007	bbg	-0.507074	-0.507113	7.15566	0.00588146	0.0491259
FBgn0040666	FBgn0040666	FBgn0040666	CG12848	0.691743	0.692596	2.94256	0.00588593	0.0491259
FBgn0033421	FBgn0033421	FBgn0033421	CG1888	0.544544	0.544772	4.50772	0.00596321	0.0497185
FBgn0040743	FBgn0040743	FBgn0040743	CG15919	-1.12165	-1.12287	2.86681	0.00597828	0.049747
FBgn0029082	FBgn0029082	FBgn0029082	hbs	-0.644192	-0.64454	4.0393	0.00598344	0.049747
FBgn0004404	FBgn0004404	FBgn0004404	RpS14b	0.626869	0.627059	4.90727	0.00598545	0.049747
FBgn0030800	FBgn0030800	FBgn0030800	Nprl2	0.6628	0.663238	3.90002	0.00601319	0.0499253
FBgn0029133	FBgn0029133	FBgn0029133	REG	0.630088	0.630418	4.09338	0.00601958	0.049926
FBgn0027073	FBgn0027073	FBgn0027073	Ugt49B1	-0.675479	-0.676299	2.81732	0.00603153	0.0499729

## Sheet: 8h
	genes	FbgnID	symbol	logFC	unshrunk.logFC	logCPM	PValue	FDR
FBgn0260660	FBgn0260660	FBgn0260660	Mp	3.65487	3.65495	8.84978	3.98508e-51	3.15977e-47
FBgn0003499	FBgn0003499	FBgn0003499	sr	-2.53925	-2.53969	6.24118	1.82718e-45	7.24386e-42
FBgn0027932	FBgn0027932	FBgn0027932	Akap200	2.58491	2.58503	7.57547	4.63592e-38	1.03478e-34
FBgn0032805	FBgn0032805	FBgn0032805	CG10337	3.61235	3.61586	3.70987	5.22021e-38	1.03478e-34
FBgn0052082	FBgn0052082	FBgn0052082	IRSp53	2.08842	2.08846	9.2568	6.09276e-33	9.66189e-30
FBgn0032109	FBgn0032109	FBgn0032109	CG17005	-6.76631	-6.76713	8.98909	2.4946e-31	3.29661e-28
FBgn0031238	FBgn0031238	FBgn0031238	CG3645	1.85047	1.85079	5.60089	5.01825e-28	5.68425e-25
FBgn0029864	FBgn0029864	FBgn0029864	CG15894	1.58341	1.58351	6.90485	2.54368e-27	2.5211e-24
FBgn0039647	FBgn0039647	FBgn0039647	jus	1.9904	1.99046	8.72785	4.34805e-27	3.83063e-24
FBgn0030808	FBgn0030808	FBgn0030808	RhoGAP15B	1.691	1.69114	6.6403	1.27565e-24	1.01146e-21
FBgn0034135	FBgn0034135	FBgn0034135	Syn2	1.72035	1.72068	5.47907	2.06606e-22	1.48925e-19
FBgn0052702	FBgn0052702	FBgn0052702	Cubn	-1.96975	-1.96989	7.96489	3.21092e-22	2.12161e-19
FBgn0035578	FBgn0035578	FBgn0035578	CG13707	2.03428	2.03549	4.08998	9.59574e-22	5.85266e-19
FBgn0037712	FBgn0037712	FBgn0037712	CG16789	-2.08281	-2.0834	5.69957	3.10356e-21	1.75772e-18
FBgn0051140	FBgn0051140	FBgn0051140	CG31140	-1.58097	-1.581	9.19541	3.87407e-21	2.04783e-18
FBgn0265174	FBgn0265174	FBgn0265174	PIG-V	1.81039	1.81189	3.27923	1.06504e-20	5.27792e-18
FBgn0034487	FBgn0034487	FBgn0034487	Efhc1.2	2.45665	2.45951	3.28821	3.67895e-20	1.71591e-17
FBgn0032614	FBgn0032614	FBgn0032614	CG13284	1.506	1.50605	8.18507	5.38659e-20	2.37279e-17
FBgn0014859	FBgn0014859	FBgn0014859	Hr38	-3.25968	-3.25992	8.21952	8.84969e-20	3.69312e-17
FBgn0053542	FBgn0053542	FBgn0053542	upd3	2.02416	2.02632	3.04957	2.01634e-19	7.99378e-17
FBgn0264598	FBgn0264598	FBgn0264598	PsGEF	-1.40017	-1.40017	11.6371	2.60525e-19	9.83669e-17
FBgn0026084	FBgn0026084	FBgn0026084	cib	1.41234	1.41254	5.93081	1.67928e-18	6.05228e-16
FBgn0286785	FBgn0286785	FBgn0286785	scb	1.58605	1.58644	5.16156	2.23863e-18	7.71744e-16
FBgn0031457	FBgn0031457	FBgn0031457	CG3077	1.467	1.46741	4.89961	5.2747e-18	1.74263e-15
FBgn0014135	FBgn0014135	FBgn0014135	bnl	2.16292	2.16303	7.91233	1.01905e-17	3.23202e-15
FBgn0024150	FBgn0024150	FBgn0024150	Ac78C	1.54578	1.54612	5.10453	1.41462e-17	4.31404e-15
FBgn0036381	FBgn0036381	FBgn0036381	CG8745	-2.12958	-2.13005	6.40023	1.94469e-16	5.71092e-14
FBgn0033188	FBgn0033188	FBgn0033188	Drat	1.31166	1.3118	6.41375	2.30218e-16	6.51929e-14
FBgn0034156	FBgn0034156	FBgn0034156	CG5348	2.03758	2.03971	3.13967	2.97617e-16	8.13725e-14
FBgn0259099	FBgn0259099	FBgn0259099	DCX-EMAP	-1.62004	-1.62009	8.87235	3.16014e-16	8.35225e-14
FBgn0037217	FBgn0037217	FBgn0037217	CG14636	1.88288	1.88325	5.4571	3.36989e-16	8.61932e-14
FBgn0015777	FBgn0015777	FBgn0015777	nrv2	-1.34111	-1.34124	6.94743	5.99194e-16	1.48469e-13
FBgn0036279	FBgn0036279	FBgn0036279	Ncc69	1.36025	1.36028	8.70382	6.28685e-16	1.51056e-13
FBgn0029689	FBgn0029689	FBgn0029689	CG6428	1.64618	1.64682	4.55651	7.95602e-16	1.85539e-13
FBgn0035917	FBgn0035917	FBgn0035917	Zasp66	1.77831	1.77843	7.14499	8.92406e-16	2.02168e-13
FBgn0037151	FBgn0037151	FBgn0037151	CG7130	1.87927	1.88313	2.57614	1.43582e-15	3.1624e-13
FBgn0037933	FBgn0037933	FBgn0037933	Ho	1.50515	1.50648	3.5613	1.70063e-15	3.6444e-13
FBgn0041712	FBgn0041712	FBgn0041712	yellow-d	2.35861	2.35942	4.89434	2.73486e-15	5.7065e-13
FBgn0261649	FBgn0261649	FBgn0261649	tinc	1.68151	1.6816	7.59533	3.14618e-15	6.39643e-13
FBgn0002542	FBgn0002542	FBgn0002542	lds	1.56667	1.56792	3.74884	4.82977e-15	9.57382e-13
FBgn0001258	FBgn0001258	FBgn0001258	Ldh	3.61384	3.61473	5.741	8.43508e-15	1.63126e-12
FBgn0038126	FBgn0038126	FBgn0038126	CG8483	-1.93719	-1.93922	3.91029	1.26705e-14	2.39202e-12
FBgn0035699	FBgn0035699	FBgn0035699	CG13300	1.52894	1.52941	4.46866	1.36218e-14	2.51179e-12
FBgn0035577	FBgn0035577	FBgn0035577	CG13708	2.25623	2.25778	3.75088	1.96618e-14	3.54315e-12
FBgn0031688	FBgn0031688	FBgn0031688	Cyp28d2	-2.71326	-2.71528	4.28144	2.39655e-14	4.22273e-12
FBgn0032713	FBgn0032713	FBgn0032713	Ugt36D1	1.50072	1.50139	4.14607	2.52438e-14	4.35126e-12
FBgn0036544	FBgn0036544	FBgn0036544	sff	-1.46753	-1.46756	9.55196	2.62167e-14	4.42281e-12
FBgn0051156	FBgn0051156	FBgn0051156	CG31156	1.41575	1.41616	4.77042	2.72258e-14	4.49736e-12
FBgn0033402	FBgn0033402	FBgn0033402	Myd88	1.6298	1.63009	5.56498	2.89446e-14	4.6837e-12
FBgn0037997	FBgn0037997	FBgn0037997	CG14742	1.83848	1.84184	2.59327	3.26529e-14	5.17809e-12
FBgn0087005	FBgn0087005	FBgn0087005	rtp	1.55051	1.55053	9.66596	3.91852e-14	6.07958e-12
FBgn0001991	FBgn0001991	FBgn0001991	Ca-alpha1D	-1.11836	-1.11837	10.741	3.98711e-14	6.07958e-12
FBgn0003559	FBgn0003559	FBgn0003559	su(f)	-1.41627	-1.41641	7.17647	5.99198e-14	8.96423e-12
FBgn0250839	FBgn0250839	FBgn0250839	CG2016	2.47623	2.47635	7.21139	6.52397e-14	9.57937e-12
FBgn0031240	FBgn0031240	FBgn0031240	CG3345	2.07132	2.07457	2.75482	6.91425e-14	9.96783e-12
FBgn0038395	FBgn0038395	FBgn0038395	CG10407	1.72388	1.72686	2.26561	1.32552e-13	1.87679e-11
FBgn0035383	FBgn0035383	FBgn0035383	CPT2	1.22578	1.22604	5.44782	1.55574e-13	2.16412e-11
FBgn0046685	FBgn0046685	FBgn0046685	Wsck	1.42796	1.42876	3.86299	1.65466e-13	2.26203e-11
FBgn0037082	FBgn0037082	FBgn0037082	CG5664	1.64779	1.6487	4.14677	1.82131e-13	2.44765e-11
FBgn0266000	FBgn0266000	FBgn0266000	CG44774	1.40684	1.40695	6.96531	1.95576e-13	2.58454e-11
FBgn0033159	FBgn0033159	FBgn0033159	Dscam1	1.42849	1.42851	8.88421	2.29993e-13	2.98953e-11
FBgn0033885	FBgn0033885	FBgn0033885	DJ-1alpha	-1.8217	-1.82468	3.30721	2.70286e-13	3.4566e-11
FBgn0085419	FBgn0085419	FBgn0085419	Rgk2	-1.54025	-1.54041	6.92024	4.02987e-13	5.07187e-11
FBgn0033226	FBgn0033226	FBgn0033226	CG1882	1.61832	1.61839	7.80055	4.7977e-13	5.9439e-11
FBgn0035995	FBgn0035995	FBgn0035995	CG3529	1.42447	1.42458	6.65186	5.16573e-13	6.3014e-11
FBgn0010263	FBgn0010263	FBgn0010263	Rbp9	1.13678	1.1368	9.41731	6.35542e-13	7.63517e-11
FBgn0261535	FBgn0261535	FBgn0261535	l(2)34Fd	1.64012	1.64065	4.5483	9.04256e-13	1.07013e-10
FBgn0262733	FBgn0262733	FBgn0262733	Src64B	1.29127	1.29142	5.93775	1.10531e-12	1.28882e-10
FBgn0031589	FBgn0031589	FBgn0031589	Naprt	1.52966	1.52971	8.61897	1.3023e-12	1.49651e-10
FBgn0003515	FBgn0003515	FBgn0003515	st	1.30125	1.30189	4.35282	1.96573e-12	2.22661e-10
FBgn0024222	FBgn0024222	FBgn0024222	IKKbeta	1.45141	1.45207	4.24668	2.16784e-12	2.42096e-10
FBgn0039312	FBgn0039312	FBgn0039312	CG10514	-1.74025	-1.74264	3.8296	3.62332e-12	3.99018e-10
FBgn0262508	FBgn0262508	FBgn0262508	CG43078	-1.14128	-1.14129	9.85674	4.79871e-12	5.21218e-10
FBgn0285926	FBgn0285926	FBgn0285926	Imp	1.03801	1.03807	7.71422	7.58582e-12	8.1281e-10
FBgn0000578	FBgn0000578	FBgn0000578	ena	1.02087	1.02095	6.49207	8.98217e-12	9.49595e-10
FBgn0032775	FBgn0032775	FBgn0032775	CG17544	1.37861	1.37884	5.59522	1.02506e-11	1.06944e-09
FBgn0039527	FBgn0039527	FBgn0039527	CG5639	1.83889	1.83924	5.51552	1.21413e-11	1.25024e-09
FBgn0065035	FBgn0065035	FBgn0065035	AlkB	1.74339	1.74765	2.05685	1.29545e-11	1.31688e-09
FBgn0027106	FBgn0027106	FBgn0027106	Inx7	-1.62773	-1.6285	4.44488	1.40984e-11	1.41502e-09
FBgn0023407	FBgn0023407	FBgn0023407	B4	0.986918	0.986945	8.13818	1.48875e-11	1.46215e-09
FBgn0037186	FBgn0037186	FBgn0037186	CG11241	-1.35196	-1.35235	5.42309	1.49369e-11	1.46215e-09
FBgn0010786	FBgn0010786	FBgn0010786	l(3)02640	1.1481	1.14833	5.39612	2.01713e-11	1.95047e-09
FBgn0000152	FBgn0000152	FBgn0000152	Axs	1.21393	1.21444	4.34336	2.0551e-11	1.96324e-09
FBgn0020248	FBgn0020248	FBgn0020248	stet	1.53116	1.53219	3.59582	2.13629e-11	2.007e-09
FBgn0011742	FBgn0011742	FBgn0011742	Arp2	1.33254	1.33269	6.16482	2.15153e-11	2.007e-09
FBgn0264006	FBgn0264006	FBgn0264006	dysc	-1.02163	-1.02164	11.2501	2.63787e-11	2.43206e-09
FBgn0285896	FBgn0285896	FBgn0285896	btl	-1.53954	-1.54177	3.14355	3.07744e-11	2.80472e-09
FBgn0033928	FBgn0033928	FBgn0033928	Arc2	1.6903	1.69268	2.80754	3.15967e-11	2.84694e-09
FBgn0039026	FBgn0039026	FBgn0039026	CG7029	1.2521	1.25211	10.1548	3.21957e-11	2.86831e-09
FBgn0010621	FBgn0010621	FBgn0010621	CCT5	1.44879	1.44898	6.07024	3.79753e-11	3.34562e-09
FBgn0032451	FBgn0032451	FBgn0032451	spict	1.31531	1.31581	4.51972	4.26854e-11	3.71926e-09
FBgn0266719	FBgn0266719	FBgn0266719	stac	1.38243	1.38251	6.91548	4.38984e-11	3.78337e-09
FBgn0028526	FBgn0028526	FBgn0028526	CG15293	-1.16809	-1.16849	5.24727	4.49074e-11	3.82872e-09
FBgn0267252	FBgn0267252	FBgn0267252	Ggamma30A	-1.27205	-1.27205	13.6382	4.803e-11	4.05138e-09
FBgn0042696	FBgn0042696	FBgn0042696	NfI	1.13928	1.13934	7.42378	6.74356e-11	5.62839e-09
FBgn0041627	FBgn0041627	FBgn0041627	Ku80	1.40896	1.40996	3.56421	8.33504e-11	6.88422e-09
FBgn0001296	FBgn0001296	FBgn0001296	kar	1.07438	1.07447	6.80584	8.68215e-11	7.09698e-09
FBgn0015351	FBgn0015351	FBgn0015351	CG14906	1.57898	1.58042	3.98685	1.07808e-10	8.72255e-09
FBgn0030695	FBgn0030695	FBgn0030695	PGRP-LE	1.29763	1.29852	3.82	1.09797e-10	8.79373e-09
FBgn0037465	FBgn0037465	FBgn0037465	CG1105	1.24076	1.24097	5.51749	1.1952e-10	9.47671e-09
FBgn0086347	FBgn0086347	FBgn0086347	Myo31DF	1.13738	1.13754	5.96626	1.39298e-10	1.09356e-08
FBgn0054045	FBgn0054045	FBgn0054045	CG34045	1.93396	1.9386	2.48242	1.42055e-10	1.10427e-08
FBgn0001075	FBgn0001075	FBgn0001075	ft	-1.31379	-1.3139	6.90555	1.47855e-10	1.1382e-08
FBgn0038088	FBgn0038088	FBgn0038088	CG10126	1.61039	1.61052	6.69837	1.5109e-10	1.15192e-08
FBgn0026079	FBgn0026079	FBgn0026079	Nsun2	1.15529	1.15601	3.989	1.60582e-10	1.21262e-08
FBgn0035880	FBgn0035880	FBgn0035880	Culd	1.12377	1.12378	9.59185	1.63477e-10	1.22284e-08
FBgn0036843	FBgn0036843	FBgn0036843	Sfxn2	1.35819	1.35904	3.91283	1.70826e-10	1.26587e-08
FBgn0016650	FBgn0016650	FBgn0016650	Lgr1	1.16496	1.16515	5.74678	2.46315e-10	1.80836e-08
FBgn0038721	FBgn0038721	FBgn0038721	subdued	0.985073	0.985227	5.6716	2.61155e-10	1.89972e-08
FBgn0037378	FBgn0037378	FBgn0037378	CG2046	1.45046	1.45219	2.88296	2.73416e-10	1.97083e-08
FBgn0038039	FBgn0038039	FBgn0038039	CG5196	1.04663	1.04692	4.95399	2.8091e-10	2.00661e-08
FBgn0036844	FBgn0036844	FBgn0036844	Mkp3	-1.07361	-1.07366	7.77781	3.12134e-10	2.20974e-08
FBgn0052801	FBgn0052801	FBgn0052801	CG32801	-1.83047	-1.83135	4.82086	3.69736e-10	2.59437e-08
FBgn0032414	FBgn0032414	FBgn0032414	CG17211	-1.14577	-1.14648	4.34636	4.13681e-10	2.87726e-08
FBgn0039804	FBgn0039804	FBgn0039804	CG15544	-1.64207	-1.64233	6.651	4.36112e-10	3.0069e-08
FBgn0039616	FBgn0039616	FBgn0039616	CG11828	-1.97386	-1.97476	4.94217	4.39948e-10	3.00719e-08
FBgn0037454	FBgn0037454	FBgn0037454	CG1137	1.42277	1.42397	3.33947	5.24259e-10	3.55287e-08
FBgn0264305	FBgn0264305	FBgn0264305	CG43783	-1.27798	-1.27813	6.7578	5.44458e-10	3.65848e-08
FBgn0033785	FBgn0033785	FBgn0033785	Sans	1.91873	1.92191	2.5833	5.80683e-10	3.86911e-08
FBgn0026404	FBgn0026404	FBgn0026404	Dronc	1.31692	1.3177	4.05069	6.61755e-10	4.37255e-08
FBgn0037293	FBgn0037293	FBgn0037293	CG12007	1.17273	1.17341	3.88774	7.38613e-10	4.84005e-08
FBgn0263353	FBgn0263353	FBgn0263353	CG11000	-1.18188	-1.18195	7.60251	7.81805e-10	5.08109e-08
FBgn0031955	FBgn0031955	FBgn0031955	CG14535	1.27467	1.27489	5.4848	8.01298e-10	5.16544e-08
FBgn0034451	FBgn0034451	FBgn0034451	TBCB	1.16408	1.16483	3.66745	8.73146e-10	5.58321e-08
FBgn0010583	FBgn0010583	FBgn0010583	dock	1.38108	1.38112	7.86214	9.38924e-10	5.95578e-08
FBgn0037853	FBgn0037853	FBgn0037853	CG14696	1.2221	1.22252	4.93567	1.15661e-09	7.2784e-08
FBgn0000043	FBgn0000043	FBgn0000043	Act42A	1.16182	1.16243	4.02954	1.20692e-09	7.53517e-08
FBgn0051324	FBgn0051324	FBgn0051324	CG31324	-3.77386	-3.77474	6.73006	1.21663e-09	7.53648e-08
FBgn0051636	FBgn0051636	FBgn0051636	CG31636	1.55494	1.5583	2.27656	1.24502e-09	7.65252e-08
FBgn0040606	FBgn0040606	FBgn0040606	CG6503	-1.87261	-1.87447	3.24352	1.31188e-09	8.00143e-08
FBgn0266918	FBgn0266918	FBgn0266918	CG32486	-1.01141	-1.01144	8.66889	1.41189e-09	8.54573e-08
FBgn0027499	FBgn0027499	FBgn0027499	wde	0.934301	0.934452	5.8527	1.58059e-09	9.49434e-08
FBgn0042185	FBgn0042185	FBgn0042185	MCU	-1.13429	-1.13465	5.2423	1.67982e-09	1.00145e-07
FBgn0085195	FBgn0085195	FBgn0085195	CG34166	-1.24092	-1.2417	4.11901	1.7758e-09	1.05077e-07
FBgn0250757	FBgn0250757	FBgn0250757	CG42235	-1.32495	-1.32536	4.91885	1.81462e-09	1.06578e-07
FBgn0261674	FBgn0261674	FBgn0261674	CG42709	1.04713	1.04739	4.85092	1.84115e-09	1.07342e-07
FBgn0032135	FBgn0032135	FBgn0032135	GlcAT-S	1.59763	1.5977	7.21343	1.89417e-09	1.09627e-07
FBgn0036680	FBgn0036680	FBgn0036680	Cpr73D	1.05036	1.05059	5.21955	2.20002e-09	1.26406e-07
FBgn0031053	FBgn0031053	FBgn0031053	CG14223	1.32339	1.32438	3.88988	2.53805e-09	1.44779e-07
FBgn0035537	FBgn0035537	FBgn0035537	CG11342	-1.90256	-1.9039	3.94654	2.64731e-09	1.49932e-07
FBgn0032478	FBgn0032478	FBgn0032478	CG5458	-1.42724	-1.42772	5.4415	2.99461e-09	1.67576e-07
FBgn0028515	FBgn0028515	FBgn0028515	EndoGI	1.13929	1.13986	4.20422	3.00112e-09	1.67576e-07
FBgn0050115	FBgn0050115	FBgn0050115	GEFmeso	1.04132	1.04136	7.4122	3.15056e-09	1.74691e-07
FBgn0263390	FBgn0263390	FBgn0263390	Nha2	1.17174	1.17186	6.2867	3.43367e-09	1.89066e-07
FBgn0015765	FBgn0015765	FBgn0015765	p38a	1.29048	1.29139	3.83933	3.61497e-09	1.97677e-07
FBgn0004584	FBgn0004584	FBgn0004584	Rrp1	1.31175	1.31348	2.96881	4.26611e-09	2.31685e-07
FBgn0023511	FBgn0023511	FBgn0023511	Edem1	-1.08229	-1.08235	7.74396	4.54921e-09	2.45379e-07
FBgn0032705	FBgn0032705	FBgn0032705	Grip71	1.34491	1.34658	3.00214	6.50804e-09	3.48664e-07
FBgn0286778	FBgn0286778	FBgn0286778	CG46385	-1.26608	-1.2661	10.7619	6.84118e-09	3.64052e-07
FBgn0034935	FBgn0034935	FBgn0034935	Orcokinin	1.46225	1.46261	5.59762	6.90779e-09	3.65146e-07
FBgn0031634	FBgn0031634	FBgn0031634	Ir25a	-1.36102	-1.36213	3.96944	8.32202e-09	4.35235e-07
FBgn0264962	FBgn0264962	FBgn0264962	Pcf11	-0.965506	-0.96552	9.51256	8.34352e-09	4.35235e-07
FBgn0040765	FBgn0040765	FBgn0040765	luna	1.47238	1.47243	7.8226	8.59406e-09	4.45375e-07
FBgn0031006	FBgn0031006	FBgn0031006	rictor	0.837043	0.837089	7.22503	8.81318e-09	4.53764e-07
FBgn0032945	FBgn0032945	FBgn0032945	CG8665	-1.16599	-1.1665	4.99154	8.87114e-09	4.53802e-07
FBgn0013432	FBgn0013432	FBgn0013432	bcn92	1.20776	1.20876	3.48931	8.96609e-09	4.55719e-07
FBgn0010278	FBgn0010278	FBgn0010278	Ssrp	1.25186	1.25239	4.45405	9.39228e-09	4.7434e-07
FBgn0053143	FBgn0053143	FBgn0053143	CG33143	0.98203	0.982039	9.7802	1.05176e-08	5.27811e-07
FBgn0263239	FBgn0263239	FBgn0263239	dar1	-1.51361	-1.51485	3.84737	1.06021e-08	5.28703e-07
FBgn0052806	FBgn0052806	FBgn0052806	CG32806	-1.75448	-1.75629	3.47617	1.14683e-08	5.68326e-07
FBgn0030268	FBgn0030268	FBgn0030268	Klp10A	0.899578	0.899627	7.29438	1.20848e-08	5.95157e-07
FBgn0033074	FBgn0033074	FBgn0033074	tomboy40	1.04666	1.04737	3.88149	1.3192e-08	6.45674e-07
FBgn0035000	FBgn0035000	FBgn0035000	CG13578	-1.65418	-1.6591	2.33392	1.50363e-08	7.3143e-07
FBgn0053080	FBgn0053080	FBgn0053080	CG33080	-1.51653	-1.51666	7.25761	1.69917e-08	8.21509e-07
FBgn0259111	FBgn0259111	FBgn0259111	Ndae1	1.04543	1.04546	8.44027	1.7227e-08	8.27837e-07
FBgn0020381	FBgn0020381	FBgn0020381	Dredd	1.14049	1.14091	4.70235	1.76921e-08	8.45062e-07
FBgn0031571	FBgn0031571	FBgn0031571	bark	1.05381	1.05388	6.81262	1.87474e-08	8.90107e-07
FBgn0034971	FBgn0034971	FBgn0034971	Gpat4	1.02385	1.02391	7.26813	1.92776e-08	9.09835e-07
FBgn0030421	FBgn0030421	FBgn0030421	Agpat1	0.99187	0.992096	5.45549	1.98985e-08	9.3358e-07
FBgn0264344	FBgn0264344	FBgn0264344	CG43800	1.55489	1.55784	2.76094	2.11885e-08	9.88255e-07
FBgn0034002	FBgn0034002	FBgn0034002	CG8079	0.995422	0.995741	4.80828	2.18589e-08	1.01356e-06
FBgn0025628	FBgn0025628	FBgn0025628	CG4199	1.037	1.03707	7.01048	2.26192e-08	1.04272e-06
FBgn0024989	FBgn0024989	FBgn0024989	CG3777	1.56035	1.56116	3.91793	2.27824e-08	1.04417e-06
FBgn0004406	FBgn0004406	FBgn0004406	tam	1.1413	1.14226	3.41578	2.55373e-08	1.16371e-06
FBgn0025838	FBgn0025838	FBgn0025838	CG2652	1.55869	1.56269	1.97642	2.6297e-08	1.18564e-06
FBgn0037408	FBgn0037408	FBgn0037408	NPFR	1.21704	1.21827	3.15488	2.63177e-08	1.18564e-06
FBgn0015221	FBgn0015221	FBgn0015221	Fer2LCH	0.938109	0.938163	7.46259	2.65753e-08	1.19048e-06
FBgn0034793	FBgn0034793	FBgn0034793	asrij	1.6996	1.70066	4.10288	2.67778e-08	1.19277e-06
FBgn0011202	FBgn0011202	FBgn0011202	dia	0.821155	0.821192	7.71382	2.69273e-08	1.19277e-06
FBgn0261458	FBgn0261458	FBgn0261458	capt	0.918311	0.918352	7.30233	2.74546e-08	1.20937e-06
FBgn0031191	FBgn0031191	FBgn0031191	Cp110	1.03983	1.04004	5.54521	3.03007e-08	1.32737e-06
FBgn0037290	FBgn0037290	FBgn0037290	CG1124	0.997422	0.997707	4.91135	3.08949e-08	1.34596e-06
FBgn0259938	FBgn0259938	FBgn0259938	cwo	-3.03641	-3.03665	8.14328	3.6032e-08	1.56119e-06
FBgn0051755	FBgn0051755	FBgn0051755	SoYb	1.1317	1.13296	3.21345	3.87151e-08	1.66833e-06
FBgn0020018	FBgn0020018	FBgn0020018	Ppox	1.21944	1.22076	3.03792	4.40346e-08	1.8873e-06
FBgn0260719	FBgn0260719	FBgn0260719	CR42546	1.83902	1.8399	5.13951	4.59381e-08	1.9583e-06
FBgn0029895	FBgn0029895	FBgn0029895	CG14441	0.931489	0.931536	7.60053	5.32438e-08	2.2576e-06
FBgn0030876	FBgn0030876	FBgn0030876	CG6762	1.17067	1.17188	3.09539	5.75859e-08	2.42872e-06
FBgn0038127	FBgn0038127	FBgn0038127	CG8476	-1.38057	-1.38324	2.81	5.89744e-08	2.47412e-06
FBgn0039487	FBgn0039487	FBgn0039487	gb	1.88629	1.88669	5.12261	6.39008e-08	2.66668e-06
FBgn0031267	FBgn0031267	FBgn0031267	Ipk2	1.36189	1.36467	2.44832	6.77083e-08	2.81078e-06
FBgn0037120	FBgn0037120	FBgn0037120	CG11247	1.03707	1.03723	5.91417	6.85692e-08	2.8317e-06
FBgn0035438	FBgn0035438	FBgn0035438	PHGPx	1.07076	1.07089	6.3707	7.16185e-08	2.9423e-06
FBgn0263131	FBgn0263131	FBgn0263131	CG43373	0.892973	0.893034	6.82521	7.62143e-08	3.11497e-06
FBgn0284435	FBgn0284435	FBgn0284435	tyn	-1.31093	-1.3114	5.00195	7.8593e-08	3.19409e-06
FBgn0037410	FBgn0037410	FBgn0037410	Osi2	1.49763	1.4989	3.55587	7.89559e-08	3.19409e-06
FBgn0035186	FBgn0035186	FBgn0035186	CG13912	-1.8042	-1.80561	3.89574	8.06528e-08	3.24617e-06
FBgn0085370	FBgn0085370	FBgn0085370	Pde11	0.901173	0.901225	7.10261	9.97589e-08	3.99489e-06
FBgn0030887	FBgn0030887	FBgn0030887	CG6867	2.01587	2.01604	7.02881	1.01334e-07	4.03758e-06
FBgn0261479	FBgn0261479	FBgn0261479	nero	1.20651	1.20847	2.68429	1.03519e-07	4.09131e-06
FBgn0262081	FBgn0262081	FBgn0262081	Csk	0.906477	0.90649	9.17215	1.03715e-07	4.09131e-06
FBgn0052767	FBgn0052767	FBgn0052767	CG32767	0.810362	0.810384	8.53434	1.085e-07	4.25888e-06
FBgn0286027	FBgn0286027	FBgn0286027	Rnmt	1.11416	1.11528	3.30599	1.20738e-07	4.71593e-06
FBgn0038455	FBgn0038455	FBgn0038455	CG14907	1.15457	1.15515	4.6122	1.21724e-07	4.72678e-06
FBgn0020513	FBgn0020513	FBgn0020513	Paics	-1.00733	-1.00746	6.59957	1.22491e-07	4.72678e-06
FBgn0260450	FBgn0260450	FBgn0260450	CalpC	1.11059	1.11155	3.28745	1.22805e-07	4.72678e-06
FBgn0011659	FBgn0011659	FBgn0011659	Mlh1	1.2034	1.20524	2.62234	1.29304e-07	4.95291e-06
FBgn0029093	FBgn0029093	FBgn0029093	cathD	1.09063	1.09076	6.16229	1.46865e-07	5.59851e-06
FBgn0031460	FBgn0031460	FBgn0031460	CG15399	-1.5317	-1.53467	2.85286	1.57019e-07	5.95696e-06
FBgn0031999	FBgn0031999	FBgn0031999	CG8419	1.20075	1.20091	6.0416	1.63801e-07	6.18466e-06
FBgn0037191	FBgn0037191	FBgn0037191	CG14448	-2.02629	-2.0274	4.88201	1.7044e-07	6.37561e-06
FBgn0263120	FBgn0263120	FBgn0263120	Acsl	-1.31109	-1.31114	8.51027	1.70466e-07	6.37561e-06
FBgn0051849	FBgn0051849	FBgn0051849	CG31849	-1.52858	-1.5298	4.09631	1.72303e-07	6.41404e-06
FBgn0262716	FBgn0262716	FBgn0262716	Arp3	0.986684	0.986897	5.16004	1.77578e-07	6.57952e-06
FBgn0004832	FBgn0004832	FBgn0004832	Xpac	1.37629	1.37829	2.8962	1.79055e-07	6.60339e-06
FBgn0028886	FBgn0028886	FBgn0028886	CG15279	-1.17909	-1.18072	3.12263	1.81105e-07	6.64807e-06
FBgn0036486	FBgn0036486	FBgn0036486	Msh6	1.07096	1.07179	3.51582	1.82033e-07	6.65134e-06
FBgn0033960	FBgn0033960	FBgn0033960	CG10151	0.99001	0.99067	3.87287	1.92524e-07	7.00238e-06
FBgn0261049	FBgn0261049	FBgn0261049	Vps45	-0.947293	-0.947506	5.57945	2.00591e-07	7.26249e-06
FBgn0027561	FBgn0027561	FBgn0027561	CG18659	1.15647	1.15649	8.65997	2.08554e-07	7.51646e-06
FBgn0000635	FBgn0000635	FBgn0000635	Fas2	0.944376	0.944425	7.20305	2.10795e-07	7.56288e-06
FBgn0040696	FBgn0040696	FBgn0040696	CG18675	-1.57906	-1.58332	2.16176	2.13054e-07	7.60949e-06
FBgn0001216	FBgn0001216	FBgn0001216	Hsc70-1	-1.26646	-1.26667	6.09753	2.16107e-07	7.68392e-06
FBgn0035988	FBgn0035988	FBgn0035988	CG3982	-1.11488	-1.1154	4.50929	2.2285e-07	7.88828e-06
FBgn0001987	FBgn0001987	FBgn0001987	Gli	1.12228	1.12248	5.78505	2.25001e-07	7.92902e-06
FBgn0032819	FBgn0032819	FBgn0032819	CG10463	1.21765	1.21887	3.32593	2.30162e-07	8.07503e-06
FBgn0037580	FBgn0037580	FBgn0037580	DppIII	0.99616	0.996341	5.60544	2.41454e-07	8.43386e-06
FBgn0029851	FBgn0029851	FBgn0029851	CG14445	-1.51963	-1.52092	4.17977	2.50823e-07	8.7227e-06
FBgn0038206	FBgn0038206	FBgn0038206	twf	1.02022	1.02052	4.75921	2.55421e-07	8.84381e-06
FBgn0052572	FBgn0052572	FBgn0052572	CG32572	2.33718	2.34043	3.63903	2.592e-07	8.93563e-06
FBgn0260795	FBgn0260795	FBgn0260795	NaPi-III	0.808945	0.808966	8.24096	2.62756e-07	9.01903e-06
FBgn0002787	FBgn0002787	FBgn0002787	Rpn8	0.870033	0.870277	4.98522	2.66343e-07	9.10274e-06
FBgn0038545	FBgn0038545	FBgn0038545	pasi1	1.25251	1.25444	2.43935	2.96845e-07	1.01017e-05
FBgn0266696	FBgn0266696	FBgn0266696	Svil	0.838563	0.838565	11.8657	3.22831e-07	1.0939e-05
FBgn0033936	FBgn0033936	FBgn0033936	Achl	1.53454	1.53459	8.81552	3.35023e-07	1.13038e-05
FBgn0261618	FBgn0261618	FBgn0261618	larp	0.785283	0.785297	8.8934	3.42761e-07	1.15159e-05
FBgn0004919	FBgn0004919	FBgn0004919	gol	-1.53771	-1.53775	9.38207	3.44737e-07	1.15334e-05
FBgn0262732	FBgn0262732	FBgn0262732	mbf1	0.94459	0.944722	6.15536	3.73087e-07	1.24294e-05
FBgn0265726	FBgn0265726	FBgn0265726	Nna1	1.1654	1.16543	8.76053	3.83859e-07	1.27348e-05
FBgn0002948	FBgn0002948	FBgn0002948	nod	1.00041	1.00077	4.55281	3.90816e-07	1.28845e-05
FBgn0004687	FBgn0004687	FBgn0004687	Mlc-c	1.03144	1.03154	6.53351	3.9162e-07	1.28845e-05
FBgn0264326	FBgn0264326	FBgn0264326	DNApol-epsilon255	1.09843	1.09933	3.33764	3.97376e-07	1.30198e-05
FBgn0016919	FBgn0016919	FBgn0016919	nompB	1.70622	1.70635	7.58532	4.07223e-07	1.3237e-05
FBgn0050354	FBgn0050354	FBgn0050354	UQCR-11L	-1.64088	-1.64349	3.32609	4.08273e-07	1.3237e-05
FBgn0263593	FBgn0263593	FBgn0263593	Lpin	-0.864008	-0.864014	10.6727	4.09013e-07	1.3237e-05
FBgn0032731	FBgn0032731	FBgn0032731	Swip-1	-1.59688	-1.59762	5.0677	4.17737e-07	1.34644e-05
FBgn0036446	FBgn0036446	FBgn0036446	CG9384	1.00513	1.00522	6.73419	4.34701e-07	1.39544e-05
FBgn0261041	FBgn0261041	FBgn0261041	stj	-0.783528	-0.783532	10.8674	4.37435e-07	1.39856e-05
FBgn0000253	FBgn0000253	FBgn0000253	Cam	-1.1283	-1.1283	11.4972	4.48226e-07	1.4266e-05
FBgn0050108	FBgn0050108	FBgn0050108	CG30108	1.07756	1.07837	3.56909	4.49804e-07	1.4266e-05
FBgn0000317	FBgn0000317	FBgn0000317	ck	0.89481	0.894885	6.66735	4.62174e-07	1.45999e-05
FBgn0085377	FBgn0085377	FBgn0085377	CG34348	0.967522	0.967813	4.87263	4.99733e-07	1.57237e-05
FBgn0035166	FBgn0035166	FBgn0035166	JMJD5	1.0534	1.05442	3.15444	5.34708e-07	1.67577e-05
FBgn0024913	FBgn0024913	FBgn0024913	Actbeta	0.881051	0.881129	6.62825	5.67063e-07	1.77017e-05
FBgn0066084	FBgn0066084	FBgn0066084	RpL41	-1.34792	-1.34824	5.6303	5.74538e-07	1.78648e-05
FBgn0028572	FBgn0028572	FBgn0028572	qtc	0.822457	0.822502	7.55454	5.77499e-07	1.78867e-05
FBgn0015010	FBgn0015010	FBgn0015010	Ag5r	-1.61476	-1.61771	3.76361	5.94376e-07	1.83378e-05
FBgn0265182	FBgn0265182	FBgn0265182	CG44247	-0.989213	-0.989236	8.97435	5.99309e-07	1.84183e-05
FBgn0002284	FBgn0002284	FBgn0002284	Prosbeta6	0.926306	0.926768	4.10764	6.02662e-07	1.84498e-05
FBgn0032923	FBgn0032923	FBgn0032923	CG9248	1.15732	1.15851	3.08825	6.58417e-07	2.00521e-05
FBgn0039415	FBgn0039415	FBgn0039415	CG6142	-2.45878	-2.46682	3.20505	6.60058e-07	2.00521e-05
FBgn0024734	FBgn0024734	FBgn0024734	PRL-1	-1.26302	-1.26323	6.04462	6.71305e-07	2.03159e-05
FBgn0067779	FBgn0067779	FBgn0067779	dbr	0.941086	0.941189	6.5037	7.00679e-07	2.11243e-05
FBgn0033863	FBgn0033863	FBgn0033863	CG13337	1.01255	1.01293	5.31315	7.31959e-07	2.19837e-05
FBgn0029504	FBgn0029504	FBgn0029504	CHES-1-like	0.981041	0.981087	7.8652	7.38677e-07	2.21018e-05
FBgn0039178	FBgn0039178	FBgn0039178	CG6356	-1.14677	-1.14727	4.5936	7.56396e-07	2.25469e-05
FBgn0264307	FBgn0264307	FBgn0264307	orb2	-0.860636	-0.860662	8.59003	7.89849e-07	2.3428e-05
FBgn0004855	FBgn0004855	FBgn0004855	RpII15	1.14087	1.14263	2.72235	7.91866e-07	2.3428e-05
FBgn0011570	FBgn0011570	FBgn0011570	cpb	1.08171	1.08221	4.32114	8.11146e-07	2.39092e-05
FBgn0030753	FBgn0030753	FBgn0030753	rngo	0.959037	0.95945	4.43576	8.52389e-07	2.50318e-05
FBgn0033886	FBgn0033886	FBgn0033886	Rpn13	0.978192	0.97837	5.66222	8.5822e-07	2.511e-05
FBgn0029639	FBgn0029639	FBgn0029639	CG14419	-1.21616	-1.21846	2.755	9.20402e-07	2.68304e-05
FBgn0051323	FBgn0051323	FBgn0051323	CG31323	1.17219	1.17297	3.78244	9.33733e-07	2.71193e-05
FBgn0020269	FBgn0020269	FBgn0020269	mspo	0.919934	0.920073	5.5166	9.74228e-07	2.81922e-05
FBgn0030477	FBgn0030477	FBgn0030477	dmrt11E	1.25888	1.26115	3.17645	9.84522e-07	2.83865e-05
FBgn0264301	FBgn0264301	FBgn0264301	CG43779	-1.40767	-1.40818	5.16046	1.04156e-06	2.99223e-05
FBgn0261999	FBgn0261999	FBgn0261999	Ca-Ma2d	-1.07133	-1.07136	8.61527	1.06763e-06	3.05604e-05
FBgn0052121	FBgn0052121	FBgn0052121	CG32121	1.14999	1.15157	2.80728	1.1234e-06	3.2041e-05
FBgn0030581	FBgn0030581	FBgn0030581	CG14408	0.708441	0.708479	7.38083	1.13237e-06	3.21813e-05
FBgn0030183	FBgn0030183	FBgn0030183	CG15309	0.924545	0.924897	4.5694	1.15541e-06	3.26541e-05
FBgn0038429	FBgn0038429	FBgn0038429	CG14882	1.11309	1.11502	2.45914	1.15725e-06	3.26541e-05
FBgn0061198	FBgn0061198	FBgn0061198	HSPC300	1.34664	1.34968	2.13215	1.18415e-06	3.32947e-05
FBgn0010194	FBgn0010194	FBgn0010194	Wnt5	0.942061	0.942656	3.90842	1.21029e-06	3.39095e-05
FBgn0032818	FBgn0032818	FBgn0032818	CG10628	1.16113	1.16249	2.96419	1.28657e-06	3.59199e-05
FBgn0029839	FBgn0029839	FBgn0029839	CG4660	1.09738	1.09757	6.21023	1.32013e-06	3.67275e-05
FBgn0266756	FBgn0266756	FBgn0266756	btsz	-0.911928	-0.911935	10.3897	1.3563e-06	3.76017e-05
FBgn0029860	FBgn0029860	FBgn0029860	CG15891	1.10058	1.10125	4.16737	1.4071e-06	3.88742e-05
FBgn0029155	FBgn0029155	FBgn0029155	Men-b	0.790262	0.79029	8.11366	1.47247e-06	4.0539e-05
FBgn0039272	FBgn0039272	FBgn0039272	CG11836	1.12819	1.12998	2.45548	1.48978e-06	4.08735e-05
FBgn0002945	FBgn0002945	FBgn0002945	nkd	-0.809664	-0.809826	5.65834	1.53092e-06	4.18573e-05
FBgn0053145	FBgn0053145	FBgn0053145	GalT1	1.02002	1.02102	3.15284	1.5409e-06	4.18977e-05
FBgn0035766	FBgn0035766	FBgn0035766	eco	0.890079	0.890503	4.29687	1.54296e-06	4.18977e-05
FBgn0037008	FBgn0037008	FBgn0037008	mTerf3	-1.20641	-1.20735	4.57871	1.55808e-06	4.2164e-05
FBgn0026751	FBgn0026751	FBgn0026751	XRCC1	0.998937	0.99924	4.97198	1.61507e-06	4.35575e-05
FBgn0032078	FBgn0032078	FBgn0032078	C1GalTA	0.874486	0.874976	4.1853	1.6371e-06	4.4002e-05
FBgn0022160	FBgn0022160	FBgn0022160	Gpo1	0.810509	0.81055	7.18969	1.70983e-06	4.56593e-05
FBgn0262035	FBgn0262035	FBgn0262035	CG42846	-1.55928	-1.56591	1.52301	1.71028e-06	4.56593e-05
FBgn0037722	FBgn0037722	FBgn0037722	CG8319	1.21209	1.21438	2.2801	1.78186e-06	4.74105e-05
FBgn0028983	FBgn0028983	FBgn0028983	Spn55B	1.07188	1.07291	3.30951	1.80159e-06	4.77753e-05
FBgn0039482	FBgn0039482	FBgn0039482	CG14258	-1.27883	-1.28136	2.70387	1.81044e-06	4.785e-05
FBgn0027329	FBgn0027329	FBgn0027329	CCT6	0.960148	0.960371	5.41874	1.82307e-06	4.80237e-05
FBgn0014417	FBgn0014417	FBgn0014417	CG13397	-1.12393	-1.12499	3.7353	1.88357e-06	4.94531e-05
FBgn0037882	FBgn0037882	FBgn0037882	CG17187	1.23614	1.23787	2.65075	1.89786e-06	4.96637e-05
FBgn0001142	FBgn0001142	FBgn0001142	Gs1	0.938359	0.938533	5.46214	1.93402e-06	5.04436e-05
FBgn0052675	FBgn0052675	FBgn0052675	Tango5	0.834525	0.834588	7.12572	1.95916e-06	5.09317e-05
FBgn0033705	FBgn0033705	FBgn0033705	CG13168	1.3821	1.3847	2.49107	2.00784e-06	5.20266e-05
FBgn0043806	FBgn0043806	FBgn0043806	CG32032	-1.23952	-1.2411	3.26981	2.073e-06	5.32638e-05
FBgn0261788	FBgn0261788	FBgn0261788	Ank2	1.12293	1.12293	13.3948	2.07409e-06	5.32638e-05
FBgn0039257	FBgn0039257	FBgn0039257	tnc	0.923402	0.92347	6.94098	2.07574e-06	5.32638e-05
FBgn0010241	FBgn0010241	FBgn0010241	Mdr50	-1.16784	-1.17018	3.20335	2.107e-06	5.38915e-05
FBgn0035499	FBgn0035499	FBgn0035499	Chd64	1.00503	1.00513	6.58683	2.15289e-06	5.48883e-05
FBgn0085408	FBgn0085408	FBgn0085408	Shrm	1.1875	1.18752	8.95499	2.17024e-06	5.51533e-05
FBgn0005683	FBgn0005683	FBgn0005683	pie	1.264	1.26701	1.93363	2.20885e-06	5.59551e-05
FBgn0000042	FBgn0000042	FBgn0000042	Act5C	0.932233	0.932252	8.83589	2.24795e-06	5.67643e-05
FBgn0052109	FBgn0052109	FBgn0052109	CG32109	1.18568	1.18782	2.24884	2.37315e-06	5.97356e-05
FBgn0027342	FBgn0027342	FBgn0027342	fz4	0.921202	0.921549	4.48823	2.4024e-06	6.02806e-05
FBgn0278604	FBgn0278604	FBgn0278604	dmt	0.966992	0.96765	3.75771	2.41739e-06	6.04652e-05
FBgn0003205	FBgn0003205	FBgn0003205	Ras85D	0.875146	0.875312	5.492	2.48537e-06	6.19702e-05
FBgn0052699	FBgn0052699	FBgn0052699	LPCAT	-1.17621	-1.1763	7.35147	2.52131e-06	6.26693e-05
FBgn0058178	FBgn0058178	FBgn0058178	CG40178	-0.787733	-0.787753	8.6878	2.5883e-06	6.41332e-05
FBgn0053094	FBgn0053094	FBgn0053094	Synd	-0.705928	-0.705952	8.17103	2.7399e-06	6.76782e-05
FBgn0028895	FBgn0028895	FBgn0028895	CG17328	1.19613	1.19839	2.48675	2.78554e-06	6.85919e-05
FBgn0033104	FBgn0033104	FBgn0033104	CG15237	1.2809	1.28436	2.06229	2.99786e-06	7.35913e-05
FBgn0261836	FBgn0261836	FBgn0261836	Msp300	-0.84186	-0.841861	13.3352	3.09426e-06	7.57235e-05
FBgn0038993	FBgn0038993	FBgn0038993	CG13843	-1.78925	-1.79066	4.24693	3.1387e-06	7.65747e-05
FBgn0002565	FBgn0002565	FBgn0002565	Lsp2	-1.17874	-1.17894	5.89358	3.2541e-06	7.91465e-05
FBgn0035904	FBgn0035904	FBgn0035904	GstO3	0.813208	0.813627	4.33503	3.37138e-06	8.17484e-05
FBgn0267429	FBgn0267429	FBgn0267429	CG45782	-0.821224	-0.821233	9.8956	3.42161e-06	8.27133e-05
FBgn0014029	FBgn0014029	FBgn0014029	2021-09-02	0.914789	0.915183	4.26149	3.56122e-06	8.58266e-05
FBgn0020386	FBgn0020386	FBgn0020386	Pdk1	-1.02448	-1.02448	10.7589	3.58806e-06	8.62113e-05
FBgn0004237	FBgn0004237	FBgn0004237	Hrb87F	0.915083	0.915169	6.35005	3.68356e-06	8.82385e-05
FBgn0033945	FBgn0033945	FBgn0033945	CG12868	1.20774	1.21005	2.28678	3.71386e-06	8.86964e-05
FBgn0031068	FBgn0031068	FBgn0031068	Alr	1.08579	1.08634	4.39586	4.10946e-06	9.78495e-05
FBgn0263046	FBgn0263046	FBgn0263046	CG43341	1.4669	1.46887	3.52866	4.2028e-06	9.97725e-05
FBgn0033984	FBgn0033984	FBgn0033984	Lap1	0.733713	0.733768	6.6897	4.24644e-06	0.000100442
FBgn0000139	FBgn0000139	FBgn0000139	ash2	0.826104	0.826514	4.23223	4.25634e-06	0.000100442
FBgn0053052	FBgn0053052	FBgn0053052	Gorab	-1.03611	-1.03716	3.7941	4.28724e-06	0.000100871
FBgn0034707	FBgn0034707	FBgn0034707	MED16	0.970478	0.971499	3.16971	4.32286e-06	0.000101408
FBgn0033400	FBgn0033400	FBgn0033400	CG2063	0.951008	0.951843	3.47361	4.42635e-06	0.00010353
FBgn0052803	FBgn0052803	FBgn0052803	CG32803	-1.27217	-1.27312	4.08079	4.57543e-06	0.000106616
FBgn0265140	FBgn0265140	FBgn0265140	Meltrin	0.817588	0.81761	8.31177	4.59693e-06	0.000106616
FBgn0037090	FBgn0037090	FBgn0037090	Est-Q	-1.0533	-1.05465	3.05819	4.59864e-06	0.000106616
FBgn0000575	FBgn0000575	FBgn0000575	emc	0.944545	0.9446	7.08079	4.62416e-06	0.000106895
FBgn0038666	FBgn0038666	FBgn0038666	Smu1	1.04953	1.05088	2.86102	4.64035e-06	0.000106957
FBgn0015396	FBgn0015396	FBgn0015396	jumu	1.11359	1.11441	3.93103	4.80149e-06	0.000110351
FBgn0034965	FBgn0034965	FBgn0034965	ppk29	1.51195	1.51354	2.77387	4.9693e-06	0.000113877
FBgn0039113	FBgn0039113	FBgn0039113	udt	1.01024	1.01056	4.7503	5.13936e-06	0.000117299
FBgn0034331	FBgn0034331	FBgn0034331	CG15067	-1.33283	-1.33391	4.08409	5.14821e-06	0.000117299
FBgn0032336	FBgn0032336	FBgn0032336	AstC	-1.25703	-1.25961	2.27335	5.21937e-06	0.00011858
FBgn0034186	FBgn0034186	FBgn0034186	CG8950	1.03206	1.03301	3.21789	5.3261e-06	0.000120659
FBgn0030027	FBgn0030027	FBgn0030027	CG1632	1.07907	1.07961	4.26665	5.36537e-06	0.000121202
FBgn0003089	FBgn0003089	FBgn0003089	pip	1.26156	1.26273	3.53679	5.39712e-06	0.000121573
FBgn0039030	FBgn0039030	FBgn0039030	CG6660	1.14656	1.14781	2.6498	5.59926e-06	0.000125769
FBgn0020270	FBgn0020270	FBgn0020270	mre11	0.963236	0.963937	3.60707	5.65084e-06	0.000126569
FBgn0037741	FBgn0037741	FBgn0037741	CG16908	0.952103	0.952553	4.20617	5.79204e-06	0.000129366
FBgn0026371	FBgn0026371	FBgn0026371	SAK	1.07072	1.07186	2.85937	5.83334e-06	0.000129923
FBgn0003459	FBgn0003459	FBgn0003459	stwl	0.88048	0.880835	4.59779	6.13643e-06	0.000136291
FBgn0267398	FBgn0267398	FBgn0267398	Yeti	-0.824797	-0.82498	5.63167	6.16886e-06	0.000136628
FBgn0037554	FBgn0037554	FBgn0037554	DNApol-iota	0.903314	0.903482	5.64314	6.26977e-06	0.000138476
FBgn0035517	FBgn0035517	FBgn0035517	CG1265	1.03081	1.03227	2.76311	6.66194e-06	0.000146729
FBgn0037236	FBgn0037236	FBgn0037236	Skp2	1.26734	1.26897	2.97083	6.92745e-06	0.000152154
FBgn0002121	FBgn0002121	FBgn0002121	l(2)gl	1.08861	1.08863	9.4689	7.01122e-06	0.000153569
FBgn0023526	FBgn0023526	FBgn0023526	CG2865	0.882694	0.882768	7.15657	7.21925e-06	0.00015769
FBgn0027574	FBgn0027574	FBgn0027574	CG5815	0.85966	0.859799	5.61186	7.33504e-06	0.000159779
FBgn0034418	FBgn0034418	FBgn0034418	CG15118	0.784296	0.784306	9.45699	7.41579e-06	0.000161095
FBgn0000053	FBgn0000053	FBgn0000053	Gart	-0.859045	-0.859164	6.54543	7.69077e-06	0.000166612
FBgn0267326	FBgn0267326	FBgn0267326	Ntl	-1.87446	-1.87646	3.25537	7.9921e-06	0.000172669
FBgn0030223	FBgn0030223	FBgn0030223	CG2111	-0.77534	-0.775416	6.45171	8.14806e-06	0.000175165
FBgn0039507	FBgn0039507	FBgn0039507	mrt	0.737398	0.737485	6.26738	8.15182e-06	0.000175165
FBgn0050263	FBgn0050263	FBgn0050263	stum	0.962453	0.962752	4.83781	8.18249e-06	0.000175349
FBgn0035714	FBgn0035714	FBgn0035714	CG8549	1.09282	1.09431	2.71634	8.25781e-06	0.000176164
FBgn0004395	FBgn0004395	FBgn0004395	unk	0.735285	0.735332	7.32723	8.26499e-06	0.000176164
FBgn0037635	FBgn0037635	FBgn0037635	CG9837	-1.12478	-1.12504	5.62471	8.55912e-06	0.000181944
FBgn0259923	FBgn0259923	FBgn0259923	2021-09-04	0.810503	0.810683	5.17496	8.59256e-06	0.000182167
FBgn0020249	FBgn0020249	FBgn0020249	stck	0.758964	0.759059	6.13029	8.69625e-06	0.000183784
FBgn0030914	FBgn0030914	FBgn0030914	CG6106	-1.16869	-1.17159	2.31203	8.71522e-06	0.000183784
FBgn0265416	FBgn0265416	FBgn0265416	Neto	-0.974568	-0.974971	4.74627	9.5871e-06	0.000201634
FBgn0052758	FBgn0052758	FBgn0052758	Snx27	-0.772751	-0.772772	8.51437	9.62356e-06	0.000201694
FBgn0032225	FBgn0032225	FBgn0032225	CG5022	0.96091	0.961585	3.76477	9.64081e-06	0.000201694
FBgn0250788	FBgn0250788	FBgn0250788	beta-Spec	0.684028	0.684034	9.83913	9.69319e-06	0.000202256
FBgn0023175	FBgn0023175	FBgn0023175	Prosalpha7	0.989545	0.989914	4.48491	1.00246e-05	0.000208622
FBgn0011660	FBgn0011660	FBgn0011660	Pms2	0.88811	0.888573	4.20575	1.00897e-05	0.000209428
FBgn0267972	FBgn0267972	FBgn0267972	Der-1	0.911729	0.912468	3.44569	1.01683e-05	0.000210507
FBgn0010812	FBgn0010812	FBgn0010812	unc-45	0.899826	0.900044	5.12136	1.0195e-05	0.000210511
FBgn0025454	FBgn0025454	FBgn0025454	Cyp6g1	-1.04247	-1.04276	5.42357	1.07451e-05	0.000221293
FBgn0050438	FBgn0050438	FBgn0050438	Ugt50B3	-0.980448	-0.981933	2.89687	1.09922e-05	0.000225795
FBgn0038533	FBgn0038533	FBgn0038533	CG7523	0.870609	0.87114	3.82035	1.14275e-05	0.000234132
FBgn0037010	FBgn0037010	FBgn0037010	CG4825	-1.55117	-1.55127	8.09967	1.1652e-05	0.000238115
FBgn0037623	FBgn0037623	FBgn0037623	CG9801	0.821975	0.822067	6.10871	1.18118e-05	0.00024076
FBgn0003301	FBgn0003301	FBgn0003301	rut	-0.836969	-0.836978	9.9439	1.19944e-05	0.000243855
FBgn0039644	FBgn0039644	FBgn0039644	rdog	0.864089	0.864197	6.10688	1.21886e-05	0.000247144
FBgn0040297	FBgn0040297	FBgn0040297	Nhe2	0.952929	0.953057	6.04106	1.22187e-05	0.000247144
FBgn0030894	FBgn0030894	FBgn0030894	Mvb12	0.980386	0.980639	5.00271	1.22497e-05	0.000247144
FBgn0028692	FBgn0028692	FBgn0028692	Rpn2	0.742675	0.742741	6.55536	1.26006e-05	0.000253579
FBgn0031777	FBgn0031777	FBgn0031777	CG9154	0.989632	0.991082	2.691	1.28353e-05	0.000257649
FBgn0003231	FBgn0003231	FBgn0003231	ref(2)P	1.38937	1.38943	7.93628	1.29608e-05	0.00025951
FBgn0028563	FBgn0028563	FBgn0028563	sut1	0.902783	0.903369	3.80769	1.30427e-05	0.000260493
FBgn0050456	FBgn0050456	FBgn0050456	CG30456	0.999692	1.00006	5.02797	1.33851e-05	0.000266659
FBgn0037880	FBgn0037880	FBgn0037880	CG17726	1.00865	1.00991	2.84824	1.34605e-05	0.000267489
FBgn0053193	FBgn0053193	FBgn0053193	sav	1.07155	1.07205	4.39424	1.35135e-05	0.000267872
FBgn0001078	FBgn0001078	FBgn0001078	ftz-f1	0.783631	0.78368	7.28004	1.36406e-05	0.000269717
FBgn0263490	FBgn0263490	FBgn0263490	mld	0.718994	0.719005	9.28493	1.40367e-05	0.000276857
FBgn0264089	FBgn0264089	FBgn0264089	sli	0.721904	0.721924	8.02919	1.43842e-05	0.000282461
FBgn0031119	FBgn0031119	FBgn0031119	CG1812	0.751173	0.751307	5.56518	1.4392e-05	0.000282461
FBgn0264308	FBgn0264308	FBgn0264308	CG43778	-1.0695	-1.06953	8.69636	1.55408e-05	0.000304255
FBgn0037483	FBgn0037483	FBgn0037483	CG14609	-1.59564	-1.59623	5.2568	1.56326e-05	0.000305299
FBgn0027053	FBgn0027053	FBgn0027053	CSN5	1.06324	1.06432	3.15052	1.56884e-05	0.000305634
FBgn0031882	FBgn0031882	FBgn0031882	Rab30	0.880643	0.88127	3.67858	1.59891e-05	0.000310729
FBgn0038390	FBgn0038390	FBgn0038390	Rbf2	1.63498	1.63825	2.34658	1.64072e-05	0.000318076
FBgn0034093	FBgn0034093	FBgn0034093	CG15706	0.861368	0.861704	4.60906	1.67015e-05	0.000322991
FBgn0020272	FBgn0020272	FBgn0020272	mst	1.05263	1.05405	2.75761	1.74905e-05	0.000337426
FBgn0030391	FBgn0030391	FBgn0030391	Rab40	0.837113	0.837447	4.59595	1.75954e-05	0.00033846
FBgn0265578	FBgn0265578	FBgn0265578	CG44405	-1.16238	-1.16325	4.01478	1.76294e-05	0.00033846
FBgn0003870	FBgn0003870	FBgn0003870	ttk	0.855944	0.855959	9.20609	1.77402e-05	0.000339763
FBgn0035425	FBgn0035425	FBgn0035425	CG17746	0.740747	0.74086	5.92012	1.78076e-05	0.000340232
FBgn0001128	FBgn0001128	FBgn0001128	Gpdh1	0.777649	0.777682	7.57375	1.7947e-05	0.00034142
FBgn0039303	FBgn0039303	FBgn0039303	CG11857	0.858457	0.858701	5.08632	1.79559e-05	0.00034142
FBgn0010590	FBgn0010590	FBgn0010590	Prosbeta1	1.17014	1.17089	3.9444	1.82799e-05	0.000346749
FBgn0032420	FBgn0032420	FBgn0032420	CG6583	0.987119	0.988551	2.91431	1.87813e-05	0.00035541
FBgn0014396	FBgn0014396	FBgn0014396	tim	-2.83593	-2.83596	10.6268	1.89117e-05	0.000357026
FBgn0010397	FBgn0010397	FBgn0010397	LamC	0.95976	0.959831	6.76231	1.94968e-05	0.000366667
FBgn0031023	FBgn0031023	FBgn0031023	CG14200	-0.726306	-0.726317	9.48169	1.95149e-05	0.000366667
FBgn0040733	FBgn0040733	FBgn0040733	CG15068	-1.52998	-1.53142	4.28632	1.95941e-05	0.000366871
FBgn0032450	FBgn0032450	FBgn0032450	CG5776	0.906111	0.907151	3.04188	1.96183e-05	0.000366871
FBgn0027073	FBgn0027073	FBgn0027073	Ugt49B1	-1.04391	-1.04537	2.81732	1.98205e-05	0.000369781
FBgn0003391	FBgn0003391	FBgn0003391	shg	-0.897824	-0.897864	8.01952	2.01622e-05	0.000375272
FBgn0037279	FBgn0037279	FBgn0037279	CG1129	0.836323	0.8368	4.02359	2.03056e-05	0.000377057
FBgn0266450	FBgn0266450	FBgn0266450	Kr-h1	-0.837004	-0.837035	8.13881	2.03742e-05	0.000377446
FBgn0028899	FBgn0028899	FBgn0028899	CG31817	-1.01521	-1.01545	5.53252	2.04729e-05	0.000378391
FBgn0052103	FBgn0052103	FBgn0052103	SCaMC	0.741362	0.741384	8.26833	2.0715e-05	0.000381974
FBgn0259151	FBgn0259151	FBgn0259151	CG42266	-1.27554	-1.27644	4.1305	2.15528e-05	0.000396502
FBgn0036134	FBgn0036134	FBgn0036134	FoxK	0.732668	0.732759	6.15986	2.20534e-05	0.000404772
FBgn0053653	FBgn0053653	FBgn0053653	Cadps	-0.725703	-0.725708	10.566	2.38463e-05	0.000436669
FBgn0031998	FBgn0031998	FBgn0031998	SLC5A11	1.11041	1.11048	7.09575	2.43458e-05	0.000444787
FBgn0037244	FBgn0037244	FBgn0037244	CG14647	0.951977	0.952539	4.0106	2.44612e-05	0.000445869
FBgn0039509	FBgn0039509	FBgn0039509	bigmax	0.988737	0.989406	4.07488	2.50395e-05	0.000455363
FBgn0031263	FBgn0031263	FBgn0031263	Tspo	0.937382	0.937517	6.2372	2.55858e-05	0.000464233
FBgn0027335	FBgn0027335	FBgn0027335	Rip11	0.769742	0.769762	8.5184	2.69257e-05	0.00048743
FBgn0261793	FBgn0261793	FBgn0261793	Trf2	0.695239	0.695252	8.87863	2.8195e-05	0.000509244
FBgn0016672	FBgn0016672	FBgn0016672	Ipp	0.751167	0.751258	6.2837	2.83552e-05	0.000510973
FBgn0039346	FBgn0039346	FBgn0039346	CG5079	-2.03498	-2.03558	6.09482	2.90157e-05	0.00052169
FBgn0264753	FBgn0264753	FBgn0264753	Rgk1	1.34371	1.34373	9.20569	2.93564e-05	0.000526621
FBgn0035989	FBgn0035989	FBgn0035989	Tat	-0.730167	-0.730252	6.50296	2.9949e-05	0.000536039
FBgn0003479	FBgn0003479	FBgn0003479	spn-A	1.18379	1.18591	2.74218	3.02031e-05	0.000539369
FBgn0033372	FBgn0033372	FBgn0033372	CG13742	-1.23489	-1.23979	1.54263	3.05583e-05	0.000544249
FBgn0037000	FBgn0037000	FBgn0037000	ZnT77C	-1.30714	-1.31099	1.77738	3.06136e-05	0.000544249
FBgn0036237	FBgn0036237	FBgn0036237	viaf	0.866817	0.867285	4.08251	3.08463e-05	0.000547159
FBgn0031775	FBgn0031775	FBgn0031775	CG9150	1.21004	1.21037	5.51497	3.12133e-05	0.000552433
FBgn0037526	FBgn0037526	FBgn0037526	ArgRS-m	0.807285	0.807607	4.48013	3.14306e-05	0.00055504
FBgn0036249	FBgn0036249	FBgn0036249	CG11560	1.00673	1.00763	3.49781	3.21669e-05	0.00056564
FBgn0037843	FBgn0037843	FBgn0037843	CG4511	0.756432	0.756777	4.35294	3.21735e-05	0.00056564
FBgn0039241	FBgn0039241	FBgn0039241	CG11089	-0.845264	-0.845404	6.19955	3.25782e-05	0.000571488
FBgn0085438	FBgn0085438	FBgn0085438	CG34409	1.10228	1.10263	4.63503	3.27557e-05	0.000573333
FBgn0028577	FBgn0028577	FBgn0028577	hfp	0.715066	0.715081	8.81028	3.41701e-05	0.000596773
FBgn0086134	FBgn0086134	FBgn0086134	Prosalpha2	0.906333	0.906699	4.38517	3.53881e-05	0.000616687
FBgn0086367	FBgn0086367	FBgn0086367	t	0.788322	0.788345	8.33468	3.556e-05	0.000618323
FBgn0260388	FBgn0260388	FBgn0260388	CG42514	0.840107	0.840384	4.76024	3.56952e-05	0.000619315
FBgn0034858	FBgn0034858	FBgn0034858	eIF2Bdelta	1.13434	1.13443	7.1114	3.61376e-05	0.000625623
FBgn0028527	FBgn0028527	FBgn0028527	CG18507	0.882046	0.882096	7.30621	3.62246e-05	0.000625763
FBgn0038173	FBgn0038173	FBgn0038173	Adgf-C	-1.41017	-1.41146	4.46229	3.71915e-05	0.000641068
FBgn0032472	FBgn0032472	FBgn0032472	CG9928	-0.9328	-0.93368	3.51599	3.73539e-05	0.000642471
FBgn0032486	FBgn0032486	FBgn0032486	mRF1	1.04806	1.04972	2.6125	3.79916e-05	0.000652025
FBgn0037141	FBgn0037141	FBgn0037141	DNApol-eta	0.895661	0.896145	4.35895	3.82876e-05	0.000655686
FBgn0030740	FBgn0030740	FBgn0030740	CG9917	0.870369	0.870593	5.26864	3.83853e-05	0.000655942
FBgn0031060	FBgn0031060	FBgn0031060	CG14231	0.954093	0.955562	2.76172	3.86184e-05	0.000658506
FBgn0030010	FBgn0030010	FBgn0030010	CG10959	1.14627	1.14819	2.55023	3.87021e-05	0.000658517
FBgn0035189	FBgn0035189	FBgn0035189	CG9119	-1.06628	-1.06754	3.37003	3.94669e-05	0.000670091
FBgn0034728	FBgn0034728	FBgn0034728	rad50	0.742762	0.742965	5.30695	4.03358e-05	0.000683382
FBgn0026873	FBgn0026873	FBgn0026873	MED18	1.05986	1.06159	2.41117	4.24595e-05	0.000716889
FBgn0266534	FBgn0266534	FBgn0266534	CG45095	-1.18573	-1.19015	1.6786	4.24944e-05	0.000716889
FBgn0033086	FBgn0033086	FBgn0033086	CG9410	0.998569	0.999838	2.90246	4.2694e-05	0.000718728
FBgn0039056	FBgn0039056	FBgn0039056	CenB1A	0.680196	0.680253	6.65026	4.32713e-05	0.000726904
FBgn0262738	FBgn0262738	FBgn0262738	norpA	-0.671353	-0.671354	13.3167	4.36324e-05	0.000731419
FBgn0266916	FBgn0266916	FBgn0266916	Cenp-C	0.890219	0.89095	3.53109	4.45864e-05	0.000745835
FBgn0053107	FBgn0053107	FBgn0053107	CG33107	1.05672	1.05856	2.32055	4.52988e-05	0.000755204
FBgn0260397	FBgn0260397	FBgn0260397	Su(var)3-3	0.775197	0.775493	4.54776	4.5337e-05	0.000755204
FBgn0032536	FBgn0032536	FBgn0032536	Ance-3	-0.847148	-0.84767	4.10777	4.61266e-05	0.000766745
FBgn0031299	FBgn0031299	FBgn0031299	CG4629	0.946527	0.946592	7.08012	4.64931e-05	0.000771222
FBgn0031483	FBgn0031483	FBgn0031483	CG9641	1.01826	1.01876	4.15304	4.72017e-05	0.000781341
FBgn0030582	FBgn0030582	FBgn0030582	CG14411	0.76601	0.766114	6.04168	4.74134e-05	0.00078321
FBgn0260933	FBgn0260933	FBgn0260933	rempA	0.876934	0.877261	4.57775	4.80926e-05	0.000791401
FBgn0035495	FBgn0035495	FBgn0035495	CG14989	-0.724629	-0.724714	6.33361	4.81089e-05	0.000791401
FBgn0002069	FBgn0002069	FBgn0002069	AspRS	0.871416	0.871519	6.64747	4.82236e-05	0.000791646
FBgn0038741	FBgn0038741	FBgn0038741	CG17186	1.09128	1.09339	2.3675	4.86441e-05	0.000796662
FBgn0085412	FBgn0085412	FBgn0085412	CG34383	0.84466	0.844675	8.88229	4.87301e-05	0.000796662
FBgn0037304	FBgn0037304	FBgn0037304	CG1113	0.891014	0.89195	3.55312	5.11311e-05	0.000834195
FBgn0038491	FBgn0038491	FBgn0038491	CG5292	1.11531	1.11642	3.54202	5.13498e-05	0.000836043
FBgn0041100	FBgn0041100	FBgn0041100	park	0.767339	0.767691	4.27115	5.14979e-05	0.000836736
FBgn0025807	FBgn0025807	FBgn0025807	Rad9	1.11771	1.11975	2.24701	5.2752e-05	0.000855359
FBgn0032587	FBgn0032587	FBgn0032587	CG5953	1.23908	1.2392	6.77606	5.2996e-05	0.000857562
FBgn0031971	FBgn0031971	FBgn0031971	Sirup	-0.951375	-0.952294	3.41171	5.48623e-05	0.000885953
FBgn0036147	FBgn0036147	FBgn0036147	Plod	0.753447	0.753664	4.93719	5.51259e-05	0.000888401
FBgn0040743	FBgn0040743	FBgn0040743	CG15919	-1.66592	-1.66817	2.86681	5.57897e-05	0.000897275
FBgn0023550	FBgn0023550	FBgn0023550	FarO	-1.45362	-1.45386	5.78971	5.66695e-05	0.000909579
FBgn0033518	FBgn0033518	FBgn0033518	Prx2540-2	-0.937688	-0.938951	3.20124	5.80141e-05	0.000929281
FBgn0037489	FBgn0037489	FBgn0037489	CG1234	0.88163	0.882473	3.27385	5.90076e-05	0.000943288
FBgn0035695	FBgn0035695	FBgn0035695	CG10226	-0.777575	-0.777847	4.75756	5.99548e-05	0.000956502
FBgn0033268	FBgn0033268	FBgn0033268	Obp44a	-0.908728	-0.909356	3.99694	6.00853e-05	0.00095666
FBgn0041789	FBgn0041789	FBgn0041789	Pax	0.706597	0.706639	7.10587	6.09262e-05	0.000968104
FBgn0052845	FBgn0052845	FBgn0052845	CG32845	1.15581	1.15758	2.64053	6.15386e-05	0.000975878
FBgn0027054	FBgn0027054	FBgn0027054	CSN4	0.861919	0.862512	3.75105	6.39921e-05	0.00101107
FBgn0026056	FBgn0026056	FBgn0026056	Rlip	0.670609	0.670733	5.74328	6.41276e-05	0.00101107
FBgn0036316	FBgn0036316	FBgn0036316	CG10960	-0.832855	-0.832972	6.34969	6.414e-05	0.00101107
FBgn0036415	FBgn0036415	FBgn0036415	CG7768	-1.32388	-1.32522	4.20887	6.46308e-05	0.00101678
FBgn0024234	FBgn0024234	FBgn0024234	gbb	0.81621	0.816556	4.45489	6.5919e-05	0.00103499
FBgn0284248	FBgn0284248	FBgn0284248	Cyt-c-p	0.747897	0.748025	5.8485	6.62745e-05	0.00103852
FBgn0051637	FBgn0051637	FBgn0051637	CG31637	0.739222	0.73929	6.40287	6.86916e-05	0.00107427
FBgn0027093	FBgn0027093	FBgn0027093	ArgRS	1.01734	1.0182	3.24741	7.13668e-05	0.00111391
FBgn0040736	FBgn0040736	FBgn0040736	IM3	-1.00548	-1.00598	5.00806	7.23856e-05	0.00112759
FBgn0034187	FBgn0034187	FBgn0034187	CG6967	-1.04416	-1.04565	2.85851	7.37834e-05	0.00114711
FBgn0036272	FBgn0036272	FBgn0036272	Sms	0.766374	0.766484	6.1929	7.39397e-05	0.0011473
FBgn0002989	FBgn0002989	FBgn0002989	okr	0.895081	0.896049	3.10838	7.43036e-05	0.00115069
FBgn0039084	FBgn0039084	FBgn0039084	CG10175	-0.964522	-0.965565	3.22414	7.46248e-05	0.00115341
FBgn0037627	FBgn0037627	FBgn0037627	CG13318	-1.1819	-1.18196	7.78907	7.66938e-05	0.00118114
FBgn0037443	FBgn0037443	FBgn0037443	Dmtn	-0.73571	-0.735723	8.93684	7.67433e-05	0.00118114
FBgn0031114	FBgn0031114	FBgn0031114	cactin	1.0333	1.03377	4.38533	7.68654e-05	0.00118114
FBgn0030052	FBgn0030052	FBgn0030052	CG12065	0.733604	0.73371	5.97337	7.76343e-05	0.00119064
FBgn0000018	FBgn0000018	FBgn0000018	abo	1.13214	1.13337	3.24046	7.83359e-05	0.00119908
FBgn0037084	FBgn0037084	FBgn0037084	Syx6	0.729539	0.729613	6.45333	7.9265e-05	0.00120921
FBgn0261461	FBgn0261461	FBgn0261461	RhoGAP18B	0.675381	0.67539	9.48442	7.93525e-05	0.00120921
FBgn0262731	FBgn0262731	FBgn0262731	CG33941	1.2122	1.21449	2.69504	7.94547e-05	0.00120921
FBgn0031434	FBgn0031434	FBgn0031434	insv	-0.955815	-0.956331	4.53639	7.96316e-05	0.00120958
FBgn0039249	FBgn0039249	FBgn0039249	CG11168	0.800649	0.800822	5.17387	7.98337e-05	0.00121033
FBgn0033153	FBgn0033153	FBgn0033153	Gadd45	1.33295	1.33406	3.72035	8.02104e-05	0.00121372
FBgn0034246	FBgn0034246	FBgn0034246	Dcr-2	0.743755	0.743906	5.32556	8.11844e-05	0.00122612
FBgn0033963	FBgn0033963	FBgn0033963	CG12857	-1.43189	-1.43449	2.59122	8.16626e-05	0.00123099
FBgn0051344	FBgn0051344	FBgn0051344	CG31344	0.956839	0.957788	3.18062	8.22076e-05	0.00123622
FBgn0011741	FBgn0011741	FBgn0011741	Arp6	1.02982	1.03079	3.48378	8.246e-05	0.00123622
FBgn0011693	FBgn0011693	FBgn0011693	Pdh	1.09525	1.09529	7.93897	8.24771e-05	0.00123622
FBgn0016059	FBgn0016059	FBgn0016059	Sema1b	0.681647	0.681711	6.6074	8.28298e-05	0.00123916
FBgn0040349	FBgn0040349	FBgn0040349	CG3699	-0.969545	-0.970512	3.45048	8.33063e-05	0.00124395
FBgn0036516	FBgn0036516	FBgn0036516	CG7656	0.743132	0.743299	5.41956	8.36605e-05	0.00124651
FBgn0261394	FBgn0261394	FBgn0261394	Prosalpha3	0.887502	0.887814	4.58286	8.37927e-05	0.00124651
FBgn0030251	FBgn0030251	FBgn0030251	CG2145	-0.787718	-0.787932	5.20731	8.47309e-05	0.00125811
GFP	GFP	NA	NA	-1.31916	-1.31927	7.04165	8.50858e-05	0.00126102
FBgn0011758	FBgn0011758	FBgn0011758	B-H1	0.856208	0.856823	3.67004	8.6622e-05	0.00128139
FBgn0032018	FBgn0032018	FBgn0032018	CG7806	0.725379	0.725515	5.29781	8.87521e-05	0.00131046
FBgn0260857	FBgn0260857	FBgn0260857	Bet1	0.909036	0.909864	3.33242	8.9665e-05	0.00132148
FBgn0040211	FBgn0040211	FBgn0040211	hgo	-0.834668	-0.835054	4.51567	9.03541e-05	0.00132775
FBgn0259163	FBgn0259163	FBgn0259163	CG42268	0.59113	0.591136	9.6615	9.04256e-05	0.00132775
FBgn0026702	FBgn0026702	FBgn0026702	l(1)G0045	0.999096	1.00132	2.04327	9.38748e-05	0.00137585
FBgn0011829	FBgn0011829	FBgn0011829	Ret	-1.1273	-1.129	2.75962	9.61821e-05	0.00140706
FBgn0035287	FBgn0035287	FBgn0035287	CG13937	0.777687	0.77779	5.94455	9.81835e-05	0.00143181
FBgn0023001	FBgn0023001	FBgn0023001	melt	-0.883866	-0.884943	3.03546	9.84145e-05	0.00143181
FBgn0031062	FBgn0031062	FBgn0031062	CG14230	0.86621	0.867041	3.40937	9.84153e-05	0.00143181
FBgn0034849	FBgn0034849	FBgn0034849	CG3500	0.884782	0.885936	2.70336	9.9801e-05	0.00144931
FBgn0020907	FBgn0020907	FBgn0020907	Scp2	-0.936177	-0.936585	4.4858	0.000101325	0.00146875
FBgn0030187	FBgn0030187	FBgn0030187	Ipod	-2.24664	-2.24917	4.79109	0.000102693	0.00148586
FBgn0263773	FBgn0263773	FBgn0263773	fok	-0.72204	-0.722152	6.42348	0.00010339	0.00149322
FBgn0032748	FBgn0032748	FBgn0032748	CG10492	0.658532	0.658592	6.73169	0.000104743	0.00151001
FBgn0085427	FBgn0085427	FBgn0085427	CG34398	-0.71741	-0.717456	7.50734	0.000106263	0.00152915
FBgn0002441	FBgn0002441	FBgn0002441	l(3)mbt	0.62868	0.628777	5.7555	0.000106699	0.00153264
FBgn0030011	FBgn0030011	FBgn0030011	Gbeta5	-0.966711	-0.967224	4.18536	0.000107038	0.00153447
FBgn0017558	FBgn0017558	FBgn0017558	Pdk	-0.812936	-0.81298	7.65345	0.000107213	0.00153447
FBgn0283427	FBgn0283427	FBgn0283427	FASN1	-0.887535	-0.88754	10.8776	0.000107696	0.0015386
FBgn0035132	FBgn0035132	FBgn0035132	mthl10	-0.744769	-0.745048	4.74364	0.000108808	0.00155168
FBgn0030157	FBgn0030157	FBgn0030157	CG1468	-1.11363	-1.11486	3.38214	0.000109135	0.00155356
FBgn0003575	FBgn0003575	FBgn0003575	su(sable)	0.7579	0.757953	7.04401	0.00010935	0.00155383
FBgn0040319	FBgn0040319	FBgn0040319	Gclc	0.719296	0.719333	7.32793	0.000110488	0.00156719
FBgn0250843	FBgn0250843	FBgn0250843	Prosalpha6	0.819905	0.820407	3.77466	0.000111307	0.00157599
FBgn0037386	FBgn0037386	FBgn0037386	CG1208	-1.08975	-1.09191	2.40457	0.000112601	0.00159147
FBgn0031769	FBgn0031769	FBgn0031769	CG9135	0.85423	0.854755	3.83473	0.000114665	0.00161776
FBgn0039183	FBgn0039183	FBgn0039183	Dis3	0.783021	0.783645	3.4673	0.000116051	0.0016344
FBgn0263600	FBgn0263600	FBgn0263600	DNApol-delta	0.952179	0.952838	3.78366	0.000116947	0.00164336
FBgn0016694	FBgn0016694	FBgn0016694	Pdp1	-1.63269	-1.63271	10.5604	0.000117101	0.00164336
FBgn0014368	FBgn0014368	FBgn0014368	nol	0.754606	0.754884	4.17564	0.000118182	0.0016556
FBgn0001321	FBgn0001321	FBgn0001321	knk	-1.26481	-1.26539	5.27184	0.000118487	0.00165694
FBgn0036745	FBgn0036745	FBgn0036745	CG7484	0.980889	0.982197	2.63323	0.000118978	0.00166088
FBgn0052137	FBgn0052137	FBgn0052137	CG32137	0.816505	0.816536	7.73372	0.000119255	0.00166182
FBgn0036341	FBgn0036341	FBgn0036341	Syx13	0.713866	0.714096	4.69025	0.00012061	0.00167775
FBgn0011274	FBgn0011274	FBgn0011274	Dif	1.01428	1.01431	7.7223	0.000122835	0.0017057
FBgn0035266	FBgn0035266	FBgn0035266	Gk2	-0.880049	-0.880523	4.36287	0.000124574	0.00172683
FBgn0004397	FBgn0004397	FBgn0004397	Vinc	-0.658577	-0.658583	10.1235	0.000125028	0.0017301
FBgn0037614	FBgn0037614	FBgn0037614	TMEM216	0.817994	0.818483	3.65298	0.00012563	0.0017354
FBgn0031948	FBgn0031948	FBgn0031948	CG7149	0.718349	0.71842	6.62555	0.000127351	0.00175221
FBgn0051159	FBgn0051159	FBgn0051159	mRRF2	0.876125	0.876691	3.75748	0.000127498	0.00175221
FBgn0264817	FBgn0264817	FBgn0264817	pre-lola-G	-1.07875	-1.08271	1.60041	0.00012751	0.00175221
FBgn0030336	FBgn0030336	FBgn0030336	CG1578	0.681033	0.681063	7.72025	0.000131947	0.00181004
FBgn0040099	FBgn0040099	FBgn0040099	lectin-28C	-0.890171	-0.890876	3.80462	0.000132256	0.00181115
FBgn0039311	FBgn0039311	FBgn0039311	CG10513	-0.885474	-0.886341	3.78643	0.000133611	0.00182656
FBgn0085249	FBgn0085249	FBgn0085249	CG34220	0.992658	0.992767	6.18526	0.000133893	0.00182726
FBgn0033476	FBgn0033476	FBgn0033476	oys	0.718386	0.718407	8.2751	0.000134215	0.0018285
FBgn0260860	FBgn0260860	FBgn0260860	Bet5	0.881263	0.882606	2.84039	0.000134794	0.00183325
FBgn0262531	FBgn0262531	FBgn0262531	CG43085	-1.03599	-1.03689	4.44853	0.000135567	0.0018406
FBgn0052529	FBgn0052529	FBgn0052529	Hers	0.625137	0.625144	9.63006	0.000136354	0.00184812
FBgn0034577	FBgn0034577	FBgn0034577	cpa	0.712447	0.712612	5.25942	0.000137093	0.00185497
FBgn0037633	FBgn0037633	FBgn0037633	CG9839	-0.92823	-0.929284	3.43318	0.00013879	0.00187473
FBgn0016675	FBgn0016675	FBgn0016675	Lectin-galC1	1.04458	1.04814	1.93389	0.000139398	0.00187751
FBgn0031973	FBgn0031973	FBgn0031973	Spn28Dc	-0.991204	-0.993325	2.57892	0.000139469	0.00187751
FBgn0085200	FBgn0085200	FBgn0085200	CG34171	0.926616	0.927838	2.77503	0.000140558	0.00188896
FBgn0028331	FBgn0028331	FBgn0028331	l(1)G0289	0.633824	0.633838	8.66494	0.000141371	0.00189667
FBgn0038873	FBgn0038873	FBgn0038873	CG5892	-1.43107	-1.43179	4.22747	0.000141711	0.00189802
FBgn0032382	FBgn0032382	FBgn0032382	Mal-B2	-0.778439	-0.778664	5.40795	0.000144922	0.00193775
FBgn0000527	FBgn0000527	FBgn0000527	e	-0.811569	-0.811783	5.15841	0.000147312	0.0019664
FBgn0030092	FBgn0030092	FBgn0030092	fh	1.04077	1.04269	2.52858	0.000147783	0.00196931
FBgn0028970	FBgn0028970	FBgn0028970	betaggt-II	0.82833	0.828789	3.99194	0.000148028	0.00196931
FBgn0063497	FBgn0063497	FBgn0063497	GstE3	0.99962	1.0001	4.34375	0.000152029	0.00201916
FBgn0003447	FBgn0003447	FBgn0003447	sn	0.729542	0.72962	6.25651	0.000153154	0.0020307
FBgn0037299	FBgn0037299	FBgn0037299	Vps37B	0.822622	0.823032	4.37241	0.000153482	0.00203165
FBgn0032609	FBgn0032609	FBgn0032609	CG13280	0.943381	0.943647	4.81242	0.000155847	0.00205952
FBgn0033354	FBgn0033354	FBgn0033354	FANCI	0.839454	0.840419	3.23749	0.000157346	0.00207586
FBgn0029706	FBgn0029706	FBgn0029706	CG3626	-2.00784	-2.00796	8.58343	0.000158027	0.00208139
FBgn0085638	FBgn0085638	FBgn0085638	CG41378	-0.682097	-0.682218	5.86694	0.0001583	0.00208153
FBgn0040070	FBgn0040070	FBgn0040070	Trx-2	0.874224	0.874398	5.51352	0.000159576	0.00209483
FBgn0036126	FBgn0036126	FBgn0036126	Irbp18	0.917757	0.91867	3.38305	0.000160087	0.00209574
FBgn0029828	FBgn0029828	FBgn0029828	CG6067	-0.937457	-0.938117	4.00779	0.000160174	0.00209574
FBgn0036906	FBgn0036906	FBgn0036906	CG14102	1.04781	1.05044	1.94975	0.000160512	0.0020967
FBgn0015600	FBgn0015600	FBgn0015600	toc	-0.629692	-0.629698	10.1898	0.000164063	0.00213956
FBgn0025865	FBgn0025865	FBgn0025865	Cortactin	0.706849	0.707002	5.2907	0.000167455	0.00218021
FBgn0039250	FBgn0039250	FBgn0039250	Mink	1.06361	1.06543	2.75697	0.000169645	0.00220511
FBgn0033906	FBgn0033906	FBgn0033906	ReepB	0.762272	0.762557	4.55899	0.000171221	0.00222195
FBgn0030086	FBgn0030086	FBgn0030086	CCT2	0.890106	0.890213	6.36805	0.000172749	0.00223812
FBgn0011591	FBgn0011591	FBgn0011591	fng	-0.754036	-0.754356	4.4992	0.000176157	0.00227854
FBgn0037025	FBgn0037025	FBgn0037025	Spc105R	1.03015	1.03143	2.91098	0.000178931	0.00231066
FBgn0259685	FBgn0259685	FBgn0259685	crb	-0.690077	-0.690081	10.5052	0.000180565	0.00232797
FBgn0039726	FBgn0039726	FBgn0039726	eIF2Balpha	0.883766	0.884515	3.49217	0.000181055	0.0023305
FBgn0265180	FBgn0265180	FBgn0265180	CG44245	0.794897	0.794992	6.47095	0.000182495	0.00234441
FBgn0015791	FBgn0015791	FBgn0015791	Rab14	0.651501	0.651578	6.16692	0.000182728	0.00234441
FBgn0087011	FBgn0087011	FBgn0087011	CG41520	-0.758488	-0.758779	4.77262	0.000184877	0.00236816
FBgn0001224	FBgn0001224	FBgn0001224	Hsp23	3.49587	3.49726	5.9542	0.000186648	0.00238699
FBgn0035231	FBgn0035231	FBgn0035231	Pcyt2	-1.00271	-1.00293	5.90739	0.000188019	0.0023972
FBgn0036665	FBgn0036665	FBgn0036665	CG13024	-0.949936	-0.951236	2.77693	0.000188051	0.0023972
FBgn0250732	FBgn0250732	FBgn0250732	gfzf	-0.822814	-0.823033	5.46631	0.00019219	0.00244603
FBgn0037376	FBgn0037376	FBgn0037376	Hat1	0.820422	0.821431	2.87934	0.000194187	0.00246748
FBgn0037297	FBgn0037297	FBgn0037297	CG1116	0.667765	0.667888	5.54279	0.000199452	0.00252665
FBgn0038279	FBgn0038279	FBgn0038279	Sdr	-0.934919	-0.936427	2.58863	0.00019948	0.00252665
FBgn0086656	FBgn0086656	FBgn0086656	shrb	0.688127	0.688233	5.92229	0.000200939	0.00254107
FBgn0023172	FBgn0023172	FBgn0023172	RhoGEF2	0.618684	0.618689	9.77746	0.000207248	0.00261382
FBgn0261547	FBgn0261547	FBgn0261547	Exn	0.937771	0.937792	8.88063	0.000207352	0.00261382
FBgn0027844	FBgn0027844	FBgn0027844	CAH1	0.801354	0.801397	7.05921	0.000208355	0.00262229
FBgn0040388	FBgn0040388	FBgn0040388	boi	0.840529	0.841164	3.78517	0.000210529	0.00264545
FBgn0023181	FBgn0023181	FBgn0023181	Orc4	1.00942	1.01133	2.26135	0.000213278	0.00267576
FBgn0030352	FBgn0030352	FBgn0030352	sicily	0.888999	0.890427	2.64377	0.000215247	0.00269076
FBgn0033661	FBgn0033661	FBgn0033661	CG13185	0.769316	0.769371	6.90669	0.000215309	0.00269076
FBgn0052982	FBgn0052982	FBgn0052982	CG32982	0.703357	0.703432	6.0999	0.000215492	0.00269076
FBgn0002905	FBgn0002905	FBgn0002905	DNApol-theta	0.745466	0.745779	4.32084	0.000217388	0.00271017
FBgn0260386	FBgn0260386	FBgn0260386	mtg	-1.0523	-1.05391	2.92916	0.00022341	0.00277838
FBgn0039431	FBgn0039431	FBgn0039431	plum	0.660884	0.66093	6.83529	0.00022356	0.00277838
FBgn0037262	FBgn0037262	FBgn0037262	MED31	0.667309	0.66757	4.79679	0.000226615	0.00281194
FBgn0026378	FBgn0026378	FBgn0026378	Rep	0.723948	0.724393	3.77087	0.000229226	0.0028399
FBgn0266521	FBgn0266521	FBgn0266521	stai	-0.736004	-0.736049	7.32057	0.000230051	0.00284567
FBgn0036813	FBgn0036813	FBgn0036813	Atg3	0.718466	0.718676	5.26248	0.000235832	0.00291264
FBgn0035143	FBgn0035143	FBgn0035143	Ppm1	-1.58917	-1.59007	4.30298	0.000238214	0.00293176
FBgn0052579	FBgn0052579	FBgn0052579	CG32579	0.865052	0.866322	2.63378	0.000238391	0.00293176
FBgn0052296	FBgn0052296	FBgn0052296	Mrtf	0.662113	0.66215	7.28117	0.00023849	0.00293176
FBgn0038149	FBgn0038149	FBgn0038149	GILT1	0.786927	0.787372	3.98324	0.000239349	0.00293777
FBgn0039590	FBgn0039590	FBgn0039590	CG10011	0.687158	0.687187	7.98479	0.000240716	0.00294549
FBgn0038806	FBgn0038806	FBgn0038806	CG5412	1.01355	1.01501	2.766	0.000240721	0.00294549
FBgn0032477	FBgn0032477	FBgn0032477	CG5287	-0.723222	-0.723366	5.93689	0.000241324	0.00294831
FBgn0034312	FBgn0034312	FBgn0034312	CG10916	0.769876	0.77007	5.30118	0.000242335	0.00295611
FBgn0037705	FBgn0037705	FBgn0037705	mura	0.577791	0.577798	9.63214	0.000247632	0.00301609
FBgn0027518	FBgn0027518	FBgn0027518	Wdr24	0.916713	0.917543	3.33249	0.00024867	0.00302161
FBgn0040752	FBgn0040752	FBgn0040752	Prosap	-0.970063	-0.970081	9.47482	0.000248848	0.00302161
FBgn0023479	FBgn0023479	FBgn0023479	teq	-0.802909	-0.802971	6.9562	0.000252255	0.0030583
FBgn0052649	FBgn0052649	FBgn0052649	Coq8	0.838701	0.839003	4.68561	0.000252659	0.00305853
FBgn0037560	FBgn0037560	FBgn0037560	CR18228	0.846084	0.846801	3.88852	0.000253824	0.00306794
FBgn0028688	FBgn0028688	FBgn0028688	Rpn7	0.754174	0.754495	4.44863	0.000254371	0.00306987
FBgn0033387	FBgn0033387	FBgn0033387	CG8008	-0.779129	-0.779713	3.65647	0.000254848	0.00307083
FBgn0036661	FBgn0036661	FBgn0036661	CG9705	0.74195	0.742092	5.87611	0.000255225	0.00307083
FBgn0259741	FBgn0259741	FBgn0259741	CG42395	-1.04358	-1.04441	3.71213	0.000257606	0.00309479
FBgn0039767	FBgn0039767	FBgn0039767	CG2218	0.782119	0.782348	4.97276	0.000260207	0.00312131
FBgn0264691	FBgn0264691	FBgn0264691	Lst8	0.897468	0.898509	3.07562	0.000260677	0.00312222
FBgn0036476	FBgn0036476	FBgn0036476	sstn	0.698175	0.698475	4.47892	0.000266102	0.00318239
FBgn0032514	FBgn0032514	FBgn0032514	CG9302	0.902491	0.903986	2.62686	0.000266518	0.00318256
FBgn0261445	FBgn0261445	FBgn0261445	sgl	0.678564	0.678683	5.7292	0.000267032	0.0031839
FBgn0038735	FBgn0038735	FBgn0038735	CG4662	-0.741073	-0.741085	9.39785	0.000269725	0.00321119
FBgn0262482	FBgn0262482	FBgn0262482	CG43072	-0.913395	-0.914179	3.27242	0.000274098	0.00325835
FBgn0020300	FBgn0020300	FBgn0020300	geko	-1.02086	-1.02391	1.69314	0.000276639	0.00328199
FBgn0029930	FBgn0029930	FBgn0029930	CG12541	0.959268	0.959774	4.58152	0.000276914	0.00328199
FBgn0033864	FBgn0033864	FBgn0033864	CG18368	0.816173	0.816553	4.84341	0.000277487	0.00328387
FBgn0026737	FBgn0026737	FBgn0026737	CG6171	0.897272	0.898128	3.3672	0.00027994	0.00330797
FBgn0000261	FBgn0000261	FBgn0000261	Cat	-0.922145	-0.922147	12.3973	0.000282414	0.00333223
FBgn0031881	FBgn0031881	FBgn0031881	MME1	1.10083	1.10138	4.31698	0.000282862	0.00333256
FBgn0030482	FBgn0030482	FBgn0030482	CG1673	-0.923139	-0.92354	5.17409	0.000288206	0.00339048
FBgn0032863	FBgn0032863	FBgn0032863	Cdc23	1.10922	1.11121	2.48844	0.00029026	0.00340959
FBgn0011576	FBgn0011576	FBgn0011576	Cyp4d2	-0.83287	-0.833048	5.50808	0.000291218	0.00341579
FBgn0052698	FBgn0052698	FBgn0052698	CARPB	-0.714627	-0.714768	5.82429	0.000291733	0.00341677
FBgn0002723	FBgn0002723	FBgn0002723	Met	0.642411	0.642517	5.88827	0.000296179	0.00346194
FBgn0036935	FBgn0036935	FBgn0036935	CG14186	-1.07723	-1.07725	9.57163	0.000296464	0.00346194
FBgn0051301	FBgn0051301	FBgn0051301	CG31301	0.815343	0.815919	3.75352	0.000300675	0.00350596
FBgn0264325	FBgn0264325	FBgn0264325	Atg6	0.782342	0.782787	3.98621	0.000305003	0.0035479
FBgn0286784	FBgn0286784	FBgn0286784	TER94	0.663605	0.663651	6.92106	0.000305166	0.0035479
FBgn0267796	FBgn0267796	FBgn0267796	Tmc	-0.813204	-0.814348	2.96761	0.000306486	0.00355642
FBgn0259745	FBgn0259745	FBgn0259745	wech	0.719973	0.720031	6.92298	0.000306797	0.00355642
FBgn0038957	FBgn0038957	FBgn0038957	CG7059	0.879827	0.8811	3.0086	0.000308305	0.00356701
FBgn0032586	FBgn0032586	FBgn0032586	Tpr2	-0.608283	-0.608382	6.06904	0.00030861	0.00356701
FBgn0028894	FBgn0028894	FBgn0028894	GMF	0.812546	0.813462	2.85498	0.000309199	0.00356861
FBgn0263110	FBgn0263110	FBgn0263110	CG43367	0.641408	0.641419	8.9019	0.00031001	0.00357189
FBgn0001150	FBgn0001150	FBgn0001150	gt	-0.906744	-0.906924	5.88677	0.000310384	0.00357189
FBgn0266111	FBgn0266111	FBgn0266111	ana3	0.785224	0.785858	3.58953	0.0003169	0.00363951
FBgn0030296	FBgn0030296	FBgn0030296	CG15196	-1.69431	-1.69547	5.24305	0.000317178	0.00363951
FBgn0052026	FBgn0052026	FBgn0052026	CG32026	-0.818203	-0.818568	4.35321	0.000318988	0.00365499
FBgn0038419	FBgn0038419	FBgn0038419	CG14879	0.982246	0.983465	3.01885	0.000323297	0.00369902
FBgn0052150	FBgn0052150	FBgn0052150	meru	-0.974645	-0.976777	3.09147	0.000324556	0.00370334
FBgn0028394	FBgn0028394	FBgn0028394	CG17834	-0.868612	-0.869805	2.98114	0.000324609	0.00370334
FBgn0040582	FBgn0040582	FBgn0040582	CG5791	-0.836176	-0.837253	3.28026	0.000325891	0.00371263
FBgn0037379	FBgn0037379	FBgn0037379	CG10979	-0.747853	-0.747887	7.83877	0.00032775	0.00372846
FBgn0030114	FBgn0030114	FBgn0030114	CG17754	0.631148	0.631248	5.85647	0.000328467	0.00373126
FBgn0028546	FBgn0028546	FBgn0028546	ics	0.821687	0.822049	4.31669	0.000329277	0.0037351
FBgn0085483	FBgn0085483	FBgn0085483	CG34454	-1.14897	-1.15283	1.94453	0.000333006	0.003772
FBgn0017590	FBgn0017590	FBgn0017590	klg	0.638118	0.638192	6.12418	0.000337239	0.00381451
FBgn0002715	FBgn0002715	FBgn0002715	mei-S332	0.931841	0.934099	2.02088	0.000346362	0.00391037
FBgn0285912	FBgn0285912	FBgn0285912	mah	1.0106	1.01109	5.16018	0.000346701	0.00391037
FBgn0032246	FBgn0032246	FBgn0032246	Wdfy2	0.686941	0.687136	4.85531	0.000349908	0.00394094
FBgn0000490	FBgn0000490	FBgn0000490	dpp	-0.686997	-0.687151	5.54393	0.000350741	0.00394472
FBgn0033174	FBgn0033174	FBgn0033174	CG11125	0.929439	0.931146	2.93299	0.000351556	0.00394559
FBgn0026086	FBgn0026086	FBgn0026086	Adar	-0.625479	-0.625488	9.45686	0.000351814	0.00394559
FBgn0004368	FBgn0004368	FBgn0004368	Ptp4E	0.68463	0.68464	9.02111	0.000356749	0.00399528
FBgn0040493	FBgn0040493	FBgn0040493	grsm	0.740737	0.741024	4.48691	0.000359452	0.00401988
FBgn0001226	FBgn0001226	FBgn0001226	Hsp27	3.07903	3.08013	6.18202	0.000360561	0.0040266
FBgn0033755	FBgn0033755	FBgn0033755	ClC-b	0.679526	0.679701	4.96666	0.00036211	0.00403552
FBgn0263258	FBgn0263258	FBgn0263258	chas	0.62844	0.628465	8.10108	0.000362377	0.00403552
FBgn0024558	FBgn0024558	FBgn0024558	Dph5	0.921683	0.922767	3.13914	0.000364659	0.00405523
FBgn0038072	FBgn0038072	FBgn0038072	CG6225	-0.818661	-0.819461	3.17236	0.000366923	0.0040747
FBgn0037338	FBgn0037338	FBgn0037338	Snm1	1.01713	1.01894	2.38133	0.000372066	0.00412603
FBgn0052451	FBgn0052451	FBgn0052451	SPoCk	-0.754614	-0.754622	9.68619	0.000375018	0.00415296
FBgn0029113	FBgn0029113	FBgn0029113	Uba2	0.689765	0.689971	4.89679	0.000377659	0.00417637
FBgn0266083	FBgn0266083	FBgn0266083	ocm	0.711828	0.711893	6.57484	0.000378745	0.00418255
FBgn0032685	FBgn0032685	FBgn0032685	CG10211	-0.629154	-0.629358	4.89429	0.00037933	0.00418318
FBgn0031628	FBgn0031628	FBgn0031628	CG3294	0.77325	0.774112	3.1966	0.00038144	0.00420061
FBgn0038576	FBgn0038576	FBgn0038576	Arp5	0.802061	0.802623	3.69308	0.000383617	0.00421872
FBgn0022959	FBgn0022959	FBgn0022959	yps	0.743535	0.743605	6.90122	0.000388524	0.00426677
FBgn0039098	FBgn0039098	FBgn0039098	GILT3	1.07514	1.07682	2.66299	0.000391006	0.00428656
FBgn0031463	FBgn0031463	FBgn0031463	G6P	0.871298	0.873248	2.14048	0.000391628	0.00428656
FBgn0000826	FBgn0000826	FBgn0000826	png	1.05418	1.05505	3.38237	0.000391948	0.00428656
FBgn0000377	FBgn0000377	FBgn0000377	crn	0.714739	0.715169	3.84691	0.000394966	0.00430933
FBgn0035087	FBgn0035087	FBgn0035087	CG2765	-0.750269	-0.750299	8.11136	0.000395117	0.00430933
FBgn0039601	FBgn0039601	FBgn0039601	CG1523	0.758693	0.759146	3.92459	0.000398994	0.00434564
FBgn0025712	FBgn0025712	FBgn0025712	CG13920	-1.01468	-1.01749	1.83402	0.000400336	0.00435427
FBgn0005586	FBgn0005586	FBgn0005586	Rab3	-0.670563	-0.670588	8.03923	0.000400926	0.00435471
FBgn0037632	FBgn0037632	FBgn0037632	CCT7	0.86297	0.863137	5.51675	0.000402092	0.00436141
FBgn0034919	FBgn0034919	FBgn0034919	CG5569	0.856526	0.857813	2.5658	0.000402981	0.00436508
FBgn0029778	FBgn0029778	FBgn0029778	RhoGAP5A	0.781704	0.781907	5.18206	0.000403593	0.00436574
FBgn0262740	FBgn0262740	FBgn0262740	Evi5	0.624613	0.62464	7.64715	0.000407184	0.00439859
FBgn0286198	FBgn0286198	FBgn0286198	LKRSDH	-0.668411	-0.668481	6.81251	0.000412912	0.0044441
FBgn0036772	FBgn0036772	FBgn0036772	CG5290	0.904451	0.905114	3.65717	0.000413129	0.0044441
FBgn0086676	FBgn0086676	FBgn0086676	spin	-0.719913	-0.719935	8.53502	0.000413423	0.0044441
FBgn0033515	FBgn0033515	FBgn0033515	Ir47a	-0.852217	-0.852986	3.18902	0.000414199	0.0044441
FBgn0034914	FBgn0034914	FBgn0034914	CG5554	0.657264	0.657422	5.32932	0.000414248	0.0044441
FBgn0027569	FBgn0027569	FBgn0027569	cert	0.649762	0.649842	6.06033	0.000414833	0.0044441
FBgn0265272	FBgn0265272	FBgn0265272	CG30060	-0.836799	-0.838124	2.68227	0.000415321	0.0044441
FBgn0039209	FBgn0039209	FBgn0039209	REPTOR	0.700631	0.700665	7.69307	0.00041771	0.00446364
FBgn0022935	FBgn0022935	FBgn0022935	D19A	0.874932	0.875172	4.93918	0.000420719	0.00448958
FBgn0263864	FBgn0263864	FBgn0263864	Dark	0.640528	0.640577	6.64677	0.00042127	0.00448958
FBgn0286222	FBgn0286222	FBgn0286222	Fum1	0.655196	0.655286	5.99125	0.000431623	0.00459375
FBgn0038842	FBgn0038842	FBgn0038842	hdly	-0.826222	-0.826733	4.08731	0.000433744	0.00461013
FBgn0032684	FBgn0032684	FBgn0032684	Ugt301D1	-1.09066	-1.09352	2.17915	0.000439182	0.00466168
FBgn0029518	FBgn0029518	FBgn0029518	CG13376	-1.35904	-1.36332	2.70126	0.00045244	0.00479599
FBgn0038290	FBgn0038290	FBgn0038290	CG6912	0.724958	0.725018	6.8606	0.000453425	0.00479821
FBgn0015011	FBgn0015011	FBgn0015011	AhcyL2	-0.870567	-0.871783	3.53532	0.00045386	0.00479821
FBgn0262636	FBgn0262636	FBgn0262636	dati	0.594703	0.594762	6.54285	0.000459965	0.00485627
FBgn0051249	FBgn0051249	FBgn0051249	CG31249	0.871553	0.872727	3.1719	0.000462298	0.00487441
FBgn0011288	FBgn0011288	FBgn0011288	Snap25	-0.698509	-0.698534	8.19405	0.000470775	0.0049572
FBgn0001168	FBgn0001168	FBgn0001168	h	0.771871	0.77198	6.22302	0.000472598	0.0049698
FBgn0026252	FBgn0026252	FBgn0026252	msk	0.700911	0.700964	6.66321	0.000475524	0.00499395
FBgn0042712	FBgn0042712	FBgn0042712	HBS1	0.744594	0.744788	5.07947	0.000478525	0.00501882
FBgn0038720	FBgn0038720	FBgn0038720	CG6231	0.67174	0.671913	4.9428	0.000487964	0.00511106
FBgn0035181	FBgn0035181	FBgn0035181	CG9205	-0.734541	-0.734668	5.77629	0.00048941	0.00511943
FBgn0036062	FBgn0036062	FBgn0036062	CG6685	0.802164	0.802644	4.03456	0.00050286	0.0052532
FBgn0039828	FBgn0039828	FBgn0039828	CG1542	0.880637	0.882407	2.2418	0.000504309	0.00525999
FBgn0037963	FBgn0037963	FBgn0037963	Cad87A	-0.642014	-0.642107	6.17927	0.000504837	0.00525999
FBgn0050440	FBgn0050440	FBgn0050440	CG30440	-0.76363	-0.763969	4.42384	0.000506307	0.00526503
FBgn0033340	FBgn0033340	FBgn0033340	CG13751	0.877154	0.878252	3.03062	0.000506648	0.00526503
FBgn0010197	FBgn0010197	FBgn0010197	Gyc32E	-0.962902	-0.965706	2.13626	0.000507807	0.00527016
FBgn0032002	FBgn0032002	FBgn0032002	CG8353	0.922918	0.925725	1.81058	0.000510695	0.00529321
FBgn0032172	FBgn0032172	FBgn0032172	CG5850	0.633093	0.633189	5.84725	0.000512032	0.00529744
FBgn0262900	FBgn0262900	FBgn0262900	CG43255	-0.782386	-0.782414	8.30016	0.00051244	0.00529744
FBgn0037105	FBgn0037105	FBgn0037105	S1P	0.868996	0.869491	3.97629	0.000514757	0.00531446
FBgn0003444	FBgn0003444	FBgn0003444	smo	0.695652	0.695905	4.61004	0.000521392	0.00537596
FBgn0039722	FBgn0039722	FBgn0039722	Capa	-0.761324	-0.76139	7.21445	0.000530106	0.00545872
FBgn0043791	FBgn0043791	FBgn0043791	phu	-1.14474	-1.14535	4.77581	0.000534244	0.00549419
FBgn0035715	FBgn0035715	FBgn0035715	CG10103	0.72787	0.727909	7.1195	0.000535908	0.00550416
FBgn0030230	FBgn0030230	FBgn0030230	Rph	0.655595	0.655637	7.01797	0.000539968	0.00553868
FBgn0051961	FBgn0051961	FBgn0051961	TBCC	0.8475	0.847762	5.21302	0.000545975	0.00559307
FBgn0039751	FBgn0039751	FBgn0039751	CG1983	0.694833	0.695241	3.94422	0.000549632	0.00561889
FBgn0016697	FBgn0016697	FBgn0016697	Prosalpha5	0.930076	0.930859	3.46452	0.000550029	0.00561889
FBgn0034861	FBgn0034861	FBgn0034861	CG9815	1.17289	1.17477	2.4541	0.000550888	0.00561889
FBgn0020620	FBgn0020620	FBgn0020620	RN-tre	0.579933	0.579969	7.18824	0.00055133	0.00561889
FBgn0031144	FBgn0031144	FBgn0031144	CG1529	0.665471	0.665657	5.11743	0.000555835	0.0056506
FBgn0030096	FBgn0030096	FBgn0030096	Zpr1	0.879442	0.880366	3.18096	0.000556121	0.0056506
FBgn0036646	FBgn0036646	FBgn0036646	CR18217	0.845209	0.845999	3.20451	0.000557015	0.0056506
FBgn0261402	FBgn0261402	FBgn0261402	Ir75b	-0.768498	-0.769158	3.44201	0.000557292	0.0056506
FBgn0037240	FBgn0037240	FBgn0037240	Cont	0.592102	0.592135	7.26656	0.000558133	0.0056519
FBgn0028694	FBgn0028694	FBgn0028694	Rpn11	0.785914	0.786339	3.85414	0.000561152	0.00567522
FBgn0015929	FBgn0015929	FBgn0015929	dpa	0.93158	0.932933	2.6743	0.000562027	0.00567683
FBgn0265139	FBgn0265139	FBgn0265139	Gr2a	-1.54047	-1.5422	3.8171	0.000565244	0.00570206
FBgn0033382	FBgn0033382	FBgn0033382	Hydr1	0.627208	0.627365	5.18235	0.000568417	0.00572678
FBgn0016701	FBgn0016701	FBgn0016701	Rab4	0.657567	0.657731	5.14711	0.000569408	0.00572949
FBgn0001230	FBgn0001230	FBgn0001230	Hsp68	2.84873	2.84889	8.35221	0.000574595	0.00576757
FBgn0015774	FBgn0015774	FBgn0015774	NetB	-0.739936	-0.740059	5.73353	0.000574647	0.00576757
FBgn0029503	FBgn0029503	FBgn0029503	CHORD	0.972278	0.973635	2.85179	0.000577626	0.00579013
FBgn0034646	FBgn0034646	FBgn0034646	Rae1	0.83266	0.83374	2.88356	0.000581246	0.00581907
FBgn0034853	FBgn0034853	FBgn0034853	Ice1	0.738648	0.739008	4.1883	0.000589026	0.00588315
FBgn0035981	FBgn0035981	FBgn0035981	CG4452	0.635065	0.6352	5.50511	0.000589131	0.00588315
FBgn0032781	FBgn0032781	FBgn0032781	RtcB	0.723423	0.723823	4.04244	0.000592365	0.00590801
FBgn0038857	FBgn0038857	FBgn0038857	Bdbt	0.823261	0.824518	2.83323	0.000597579	0.00594749
FBgn0010894	FBgn0010894	FBgn0010894	sinu	0.702306	0.702737	3.79622	0.000597824	0.00594749
FBgn0040717	FBgn0040717	FBgn0040717	Nplp4	-1.18015	-1.18298	2.37973	0.000598731	0.00594905
FBgn0036620	FBgn0036620	FBgn0036620	CG4842	0.854538	0.854885	4.37417	0.000607229	0.00602404
FBgn0032683	FBgn0032683	FBgn0032683	kon	-0.740712	-0.741103	4.37763	0.000607798	0.00602404
FBgn0050085	FBgn0050085	FBgn0050085	Rif1	0.810677	0.811531	3.04289	0.00061271	0.00606514
FBgn0086698	FBgn0086698	FBgn0086698	frtz	-0.80991	-0.810117	5.84635	0.000616222	0.00609098
FBgn0052581	FBgn0052581	FBgn0052581	CG32581	1.25924	1.26032	3.54649	0.000616857	0.00609098
FBgn0046113	FBgn0046113	FBgn0046113	GluRIIC	-1.31979	-1.32335	2.19503	0.000629175	0.00620273
FBgn0052183	FBgn0052183	FBgn0052183	Ccn	-0.712583	-0.712872	4.62813	0.000629738	0.00620273
FBgn0052221	FBgn0052221	FBgn0052221	CG32221	0.784609	0.785642	2.89727	0.000642044	0.00631609
FBgn0043796	FBgn0043796	FBgn0043796	CG12219	0.756849	0.757222	4.07114	0.000644209	0.00632954
FBgn0030398	FBgn0030398	FBgn0030398	Cpr11B	-1.286	-1.28902	2.79502	0.000650199	0.00638048
FBgn0023177	FBgn0023177	FBgn0023177	Pp4-19C	0.747792	0.748124	4.42769	0.000659327	0.00646205
FBgn0032596	FBgn0032596	FBgn0032596	Prosbeta4	0.775928	0.776691	2.98339	0.00066063	0.00646683
FBgn0053182	FBgn0053182	FBgn0053182	Kdm4B	-0.61867	-0.618755	6.12523	0.000664668	0.00649833
FBgn0262509	FBgn0262509	FBgn0262509	nrm	-0.605367	-0.605369	11.4896	0.000667075	0.00651384
FBgn0040238	FBgn0040238	FBgn0040238	Best1	0.662195	0.662223	7.49821	0.000671082	0.00654491
FBgn0040660	FBgn0040660	FBgn0040660	CG13551	0.66634	0.666535	4.96218	0.000672473	0.00655042
FBgn0035444	FBgn0035444	FBgn0035444	CG12012	0.746926	0.747447	3.53781	0.000677233	0.00658869
FBgn0038862	FBgn0038862	FBgn0038862	Usp8	-1.04578	-1.04585	7.98895	0.000679992	0.00660742
FBgn0250819	FBgn0250819	FBgn0250819	CG33521	-0.917994	-0.918383	5.12234	0.000687501	0.00667221
FBgn0050392	FBgn0050392	FBgn0050392	CG30392	0.818985	0.819855	3.25363	0.000689842	0.00667938
FBgn0032879	FBgn0032879	FBgn0032879	CarT	0.710372	0.710385	8.78391	0.000690079	0.00667938
FBgn0045035	FBgn0045035	FBgn0045035	tefu	0.614707	0.614794	5.93804	0.000691402	0.00667938
FBgn0038428	FBgn0038428	FBgn0038428	CG14894	0.772814	0.773125	4.79179	0.000691609	0.00667938
FBgn0025693	FBgn0025693	FBgn0025693	ZnT41F	-0.724598	-0.725107	3.92642	0.000692504	0.00667988
FBgn0037617	FBgn0037617	FBgn0037617	nom	0.790912	0.791694	3.31318	0.000695412	0.00669978
FBgn0010247	FBgn0010247	FBgn0010247	Parp	-0.620445	-0.620484	7.50845	0.000697058	0.00670563
FBgn0013679	FBgn0013679	FBgn0013679	mt:ND1	-1.27301	-1.27349	5.60556	0.000697711	0.00670563
FBgn0266268	FBgn0266268	FBgn0266268	FeCH	0.869936	0.87024	4.73807	0.000703696	0.00675497
FBgn0038130	FBgn0038130	FBgn0038130	CG8630	-1.159	-1.16045	3.19096	0.000705617	0.0067575
FBgn0003249	FBgn0003249	FBgn0003249	Rh3	0.699502	0.699555	6.9606	0.000705664	0.0067575
FBgn0040491	FBgn0040491	FBgn0040491	Buffy	-0.882858	-0.883624	3.70965	0.00070964	0.00678737
FBgn0005561	FBgn0005561	FBgn0005561	sv	-0.679686	-0.679879	5.1683	0.000712987	0.006806
FBgn0262577	FBgn0262577	FBgn0262577	CG43117	-0.829173	-0.830807	2.63264	0.000713304	0.006806
FBgn0058160	FBgn0058160	FBgn0058160	CG40160	-0.665053	-0.665279	4.89895	0.000716435	0.00682261
FBgn0266019	FBgn0266019	FBgn0266019	rudhira	0.556168	0.556178	9.0008	0.000716766	0.00682261
FBgn0034997	FBgn0034997	FBgn0034997	CG3376	0.54774	0.547771	7.38147	0.000721063	0.00683904
FBgn0036208	FBgn0036208	FBgn0036208	CG10361	-0.884561	-0.886754	2.09234	0.000721074	0.00683904
FBgn0037203	FBgn0037203	FBgn0037203	slif	-0.72094	-0.721577	3.45709	0.000721079	0.00683904
FBgn0085354	FBgn0085354	FBgn0085354	CG34325	0.782182	0.7826	4.08849	0.000723548	0.00685425
FBgn0032154	FBgn0032154	FBgn0032154	mtDNA-helicase	1.00245	1.00539	1.92564	0.000729269	0.00690021
FBgn0003748	FBgn0003748	FBgn0003748	Treh	-0.698633	-0.698646	8.8163	0.000734618	0.00693953
FBgn0083228	FBgn0083228	FBgn0083228	Frq2	-0.655322	-0.655515	4.94827	0.000735175	0.00693953
FBgn0032223	FBgn0032223	FBgn0032223	GATAd	0.633195	0.633237	6.97343	0.000737504	0.00695324
FBgn0034859	FBgn0034859	FBgn0034859	CG3520	0.699218	0.699563	4.15358	0.000741379	0.00698147
FBgn0029990	FBgn0029990	FBgn0029990	CG2233	-0.770167	-0.770254	6.62728	0.000746874	0.00702487
FBgn0034172	FBgn0034172	FBgn0034172	CG6665	0.794269	0.795162	2.92946	0.000752443	0.00706511
FBgn0037930	FBgn0037930	FBgn0037930	CG14715	-0.829069	-0.830935	2.82041	0.000752935	0.00706511
FBgn0032020	FBgn0032020	FBgn0032020	strat	0.768168	0.769154	3.09112	0.000755697	0.00708265
FBgn0030671	FBgn0030671	FBgn0030671	CG8134	0.783085	0.783583	3.84276	0.000760236	0.00711678
FBgn0000524	FBgn0000524	FBgn0000524	dx	0.698611	0.699236	3.32149	0.0007623	0.00712768
FBgn0004047	FBgn0004047	FBgn0004047	Yp3	-1.73243	-1.73322	4.29469	0.000767139	0.00716448
FBgn0030057	FBgn0030057	FBgn0030057	Ppt1	0.726334	0.726797	3.9083	0.000770031	0.00718303
FBgn0263512	FBgn0263512	FBgn0263512	Vsx2	-0.853816	-0.855313	2.38926	0.000772196	0.00719476
FBgn0039942	FBgn0039942	FBgn0039942	CG17163	-1.09004	-1.09036	5.14428	0.000776746	0.00722666
FBgn0051036	FBgn0051036	FBgn0051036	CG31036	0.800523	0.800659	5.97989	0.000777442	0.00722666
FBgn0262475	FBgn0262475	FBgn0262475	bru2	-0.611468	-0.611616	5.3404	0.000786443	0.00730176
FBgn0033926	FBgn0033926	FBgn0033926	Arc1	0.966131	0.966173	7.70671	0.000788802	0.0073151
FBgn0036991	FBgn0036991	FBgn0036991	CtIP	-0.710985	-0.711151	5.58861	0.000792512	0.00734092
FBgn0032343	FBgn0032343	FBgn0032343	CG6201	-1.09586	-1.09829	2.24117	0.000798283	0.00738575
FBgn0029175	FBgn0029175	FBgn0029175	sotv	0.743462	0.743791	4.19069	0.000799226	0.00738586
FBgn0000448	FBgn0000448	FBgn0000448	Hr3	-0.771284	-0.771532	5.55502	0.000801917	0.0074021
FBgn0260755	FBgn0260755	FBgn0260755	CG42553	0.820651	0.821223	3.68632	0.000809255	0.00745844
FBgn0023130	FBgn0023130	FBgn0023130	a6	-0.642286	-0.642368	6.47069	0.000811203	0.00745844
FBgn0031739	FBgn0031739	FBgn0031739	CG14005	-0.797684	-0.797942	5.10633	0.000811534	0.00745844
FBgn0036136	FBgn0036136	FBgn0036136	Ufd1-like	0.756745	0.757343	3.49138	0.000811784	0.00745844
FBgn0005614	FBgn0005614	FBgn0005614	trpl	-0.645366	-0.645367	13.8212	0.00081632	0.00749143
FBgn0013675	FBgn0013675	FBgn0013675	mt:CoII	-0.838452	-0.838558	6.50823	0.000818599	0.00750367
FBgn0036765	FBgn0036765	FBgn0036765	CG7408	-0.813737	-0.814603	3.65572	0.000822547	0.00753115
FBgn0032955	FBgn0032955	FBgn0032955	CG2201	0.614003	0.61403	7.54883	0.000830933	0.00759915
FBgn0026777	FBgn0026777	FBgn0026777	Rad23	0.602897	0.602972	6.08452	0.000832661	0.00760529
FBgn0004852	FBgn0004852	FBgn0004852	Ac76E	0.62978	0.629832	6.55773	0.000833522	0.00760529
FBgn0032484	FBgn0032484	FBgn0032484	kek4	0.784091	0.784345	4.6911	0.00083728	0.00763079
FBgn0010741	FBgn0010741	FBgn0010741	Pfdn2	0.749104	0.749387	4.66569	0.00083956	0.00763605
FBgn0036287	FBgn0036287	FBgn0036287	CG10663	-0.894271	-0.895866	2.52114	0.000839782	0.00763605
FBgn0000063	FBgn0000063	FBgn0000063	Mps1	1.21665	1.21928	2.381	0.000862179	0.00783072
FBgn0036116	FBgn0036116	FBgn0036116	CG7888	-0.667866	-0.668121	4.61391	0.000864115	0.00783932
FBgn0261705	FBgn0261705	FBgn0261705	CG42741	-0.920729	-0.922065	2.90091	0.000866327	0.00784852
FBgn0053003	FBgn0053003	FBgn0053003	CG33003	1.51726	1.51931	5.26425	0.000867109	0.00784852
FBgn0260006	FBgn0260006	FBgn0260006	drd	-0.817195	-0.817469	4.99748	0.000868416	0.00785139
FBgn0052243	FBgn0052243	FBgn0052243	CG32243	-0.78578	-0.786574	3.24691	0.000870478	0.00786107
FBgn0037555	FBgn0037555	FBgn0037555	Ada2b	0.645546	0.64563	6.03284	0.000875243	0.00789511
FBgn0038858	FBgn0038858	FBgn0038858	CG5793	0.649515	0.649912	3.83365	0.000879696	0.00791384
FBgn0040849	FBgn0040849	FBgn0040849	Ir41a	-0.930656	-0.932214	3.65937	0.000879739	0.00791384
FBgn0036285	FBgn0036285	FBgn0036285	toe	0.731636	0.731855	4.81211	0.000880367	0.00791384
FBgn0015524	FBgn0015524	FBgn0015524	otp	-0.959027	-0.962482	1.82086	0.000881312	0.00791384
FBgn0029837	FBgn0029837	FBgn0029837	Tsp5D	-0.71679	-0.717131	4.58347	0.000882914	0.00791926
FBgn0004364	FBgn0004364	FBgn0004364	18w	0.753238	0.753302	6.54602	0.000891553	0.00798771
FBgn0015618	FBgn0015618	FBgn0015618	Cdk8	0.883191	0.884904	2.43229	0.000893623	0.00799722
FBgn0030744	FBgn0030744	FBgn0030744	CG9992	0.64849	0.648833	4.06081	0.000905259	0.00809222
FBgn0030630	FBgn0030630	FBgn0030630	CG12608	0.744041	0.744666	3.41928	0.000915461	0.00816797
FBgn0004370	FBgn0004370	FBgn0004370	Ptp10D	0.545105	0.545133	7.36971	0.000915793	0.00816797
FBgn0001225	FBgn0001225	FBgn0001225	Hsp26	2.50652	2.50674	8.03616	0.000918204	0.00818027
FBgn0260959	FBgn0260959	FBgn0260959	MCPH1	0.695192	0.695381	4.98918	0.000919797	0.00818526
FBgn0000636	FBgn0000636	FBgn0000636	Fas3	0.707761	0.707829	6.46135	0.000938677	0.00834392
FBgn0261064	FBgn0261064	FBgn0261064	Rbsn-5	0.693035	0.693295	4.50244	0.000954781	0.00847755
FBgn0030743	FBgn0030743	FBgn0030743	CG9921	0.814495	0.815692	2.67046	0.000957793	0.00849479
FBgn0261262	FBgn0261262	FBgn0261262	CG42613	-0.700856	-0.700897	7.25498	0.000959876	0.00850375
FBgn0040233	FBgn0040233	FBgn0040233	cana	-0.662153	-0.662366	5.05698	0.00096267	0.00851899
FBgn0036828	FBgn0036828	FBgn0036828	CG6841	0.720789	0.720997	4.80857	0.000980894	0.00867058
FBgn0036741	FBgn0036741	FBgn0036741	anchor	-0.575171	-0.575204	7.39417	0.000983469	0.00868366
FBgn0030122	FBgn0030122	FBgn0030122	Aladin	0.763113	0.764361	2.605	0.000994632	0.00877246
FBgn0085387	FBgn0085387	FBgn0085387	shakB	-0.701443	-0.701461	8.54956	0.00099854	0.00879233
FBgn0034225	FBgn0034225	FBgn0034225	veil	-0.886308	-0.887919	2.65816	0.000999103	0.00879233
FBgn0032485	FBgn0032485	FBgn0032485	CG9426	0.66102	0.661164	5.2937	0.00101742	0.00894359
FBgn0042205	FBgn0042205	FBgn0042205	CG18764	0.801938	0.803191	2.49397	0.00102125	0.00896733
FBgn0029798	FBgn0029798	FBgn0029798	CG4078	0.734243	0.734823	3.62058	0.0010249	0.00898126
FBgn0035871	FBgn0035871	FBgn0035871	BI-1	0.688422	0.688643	4.94308	0.0010251	0.00898126
FBgn0028685	FBgn0028685	FBgn0028685	Rpt4	0.665274	0.665521	4.56198	0.00103696	0.00907513
FBgn0004889	FBgn0004889	FBgn0004889	tws	-0.713194	-0.713212	8.80084	0.00104081	0.00909876
FBgn0027088	FBgn0027088	FBgn0027088	GlyRS	0.754325	0.754602	4.40178	0.0010438	0.00911489
FBgn0004893	FBgn0004893	FBgn0004893	bowl	0.7586	0.758712	5.58441	0.00105032	0.00916174
FBgn0262582	FBgn0262582	FBgn0262582	cic	-0.521242	-0.521248	9.56253	0.00105537	0.00919566
FBgn0040813	FBgn0040813	FBgn0040813	Nplp2	-0.985138	-0.985235	6.36038	0.00105903	0.0092174
FBgn0032000	FBgn0032000	FBgn0032000	CG8372	0.831674	0.832847	2.88921	0.00106274	0.00923333
FBgn0010551	FBgn0010551	FBgn0010551	Phb2	1.0756	1.07573	6.38735	0.00106319	0.00923333
FBgn0266672	FBgn0266672	FBgn0266672	Sec8	-0.578078	-0.578119	6.92229	0.00107327	0.0093051
FBgn0266917	FBgn0266917	FBgn0266917	Sf3a1	0.683831	0.684067	4.69699	0.0010738	0.0093051
FBgn0036028	FBgn0036028	FBgn0036028	CG16717	0.762371	0.763244	3.10277	0.00108796	0.00941753
FBgn0038074	FBgn0038074	FBgn0038074	Gnmt	-0.769981	-0.770208	5.47048	0.00109122	0.00943538
FBgn0037215	FBgn0037215	FBgn0037215	beta-Man	0.658292	0.65843	5.55154	0.00109246	0.00943585
FBgn0030870	FBgn0030870	FBgn0030870	CG6398	-0.637708	-0.638071	4.35404	0.0011099	0.00957609
FBgn0031458	FBgn0031458	FBgn0031458	aph-1	0.863658	0.864918	2.51237	0.00112526	0.00969799
FBgn0052626	FBgn0052626	FBgn0052626	AMPdeam	0.57325	0.573261	8.78695	0.00115862	0.00996479
FBgn0037265	FBgn0037265	FBgn0037265	spartin	0.630248	0.630453	4.83354	0.00115873	0.00996479
FBgn0033258	FBgn0033258	FBgn0033258	CG8712	0.819222	0.820065	3.10082	0.00116526	0.0100101
FBgn0260940	FBgn0260940	FBgn0260940	lsn	0.785117	0.785941	2.88757	0.00117355	0.0100705
FBgn0005613	FBgn0005613	FBgn0005613	Sox15	-0.79805	-0.799789	2.59799	0.00118383	0.0101477
FBgn0036318	FBgn0036318	FBgn0036318	Wbp2	0.531055	0.531076	7.62748	0.00119834	0.0102609
FBgn0036454	FBgn0036454	FBgn0036454	CG17839	-0.562078	-0.562082	10.7052	0.00120235	0.0102842
FBgn0026263	FBgn0026263	FBgn0026263	bip1	0.782971	0.783835	3.04953	0.00120501	0.0102958
FBgn0032815	FBgn0032815	FBgn0032815	CG10462	0.632131	0.63236	4.4469	0.00121898	0.010404
FBgn0030276	FBgn0030276	FBgn0030276	Dlic	0.594073	0.594096	7.98882	0.00122404	0.0104313
FBgn0267488	FBgn0267488	FBgn0267488	Mcr	0.584529	0.58457	6.94198	0.00122481	0.0104313
FBgn0250755	FBgn0250755	FBgn0250755	CG42233	0.634803	0.634999	4.87823	0.001236	0.0105153
FBgn0031134	FBgn0031134	FBgn0031134	CG1314	-0.837317	-0.838873	2.525	0.00123891	0.0105288
FBgn0037549	FBgn0037549	FBgn0037549	CG7878	-1.40565	-1.40571	8.42706	0.00124272	0.0105498
FBgn0035631	FBgn0035631	FBgn0035631	Txl	0.634669	0.634948	4.4164	0.00125215	0.0106185
FBgn0031233	FBgn0031233	FBgn0031233	Tbc1d15-17	0.659665	0.659887	4.66867	0.00125823	0.0106587
FBgn0039282	FBgn0039282	FBgn0039282	Bili	-0.622149	-0.622192	7.05613	0.00126946	0.0107292
FBgn0034504	FBgn0034504	FBgn0034504	CG8929	-0.592791	-0.592802	8.99826	0.00126963	0.0107292
FBgn0085279	FBgn0085279	FBgn0085279	CG34250	-0.867077	-0.868977	2.29125	0.00127061	0.0107292
FBgn0036921	FBgn0036921	FBgn0036921	RhoGDI	0.570749	0.570787	7.08485	0.00127746	0.0107748
FBgn0031868	FBgn0031868	FBgn0031868	Rat1	0.727658	0.728042	3.97508	0.00127873	0.0107748
FBgn0035833	FBgn0035833	FBgn0035833	CG7565	-0.714946	-0.715161	4.80587	0.00128255	0.0107955
FBgn0032870	FBgn0032870	FBgn0032870	CG2608	0.73947	0.739938	3.88509	0.00129679	0.0108983
FBgn0030077	FBgn0030077	FBgn0030077	CG15365	-0.80489	-0.805948	3.56923	0.00129803	0.0108983
FBgn0019637	FBgn0019637	FBgn0019637	Atu	0.703535	0.703911	4.06343	0.00129889	0.0108983
FBgn0029924	FBgn0029924	FBgn0029924	CG4586	0.871219	0.87372	1.71088	0.00130159	0.0109094
FBgn0031195	FBgn0031195	FBgn0031195	CG17600	0.794039	0.795006	2.97659	0.00130838	0.0109547
FBgn0003204	FBgn0003204	FBgn0003204	ras	0.634587	0.634701	5.70926	0.00131201	0.0109735
FBgn0028691	FBgn0028691	FBgn0028691	Rpn9	0.620318	0.62061	4.23827	0.00131342	0.0109738
FBgn0040726	FBgn0040726	FBgn0040726	dpr1	0.741182	0.741331	5.31731	0.00132035	0.0110201
FBgn0037981	FBgn0037981	FBgn0037981	Spt3	0.985308	0.98709	2.29663	0.00132704	0.0110642
FBgn0037356	FBgn0037356	FBgn0037356	CG12170	0.750228	0.751025	3.09224	0.00132994	0.0110674
FBgn0036975	FBgn0036975	FBgn0036975	CG5618	-0.731154	-0.731269	6.10749	0.00133062	0.0110674
FBgn0062440	FBgn0062440	FBgn0062440	EMRE	1.00535	1.00644	2.98317	0.0013316	0.0110674
FBgn0010113	FBgn0010113	FBgn0010113	hdc	0.604968	0.604989	8.00335	0.00134224	0.0111441
FBgn0013323	FBgn0013323	FBgn0013323	Ptth	0.849845	0.852226	2.50744	0.00134507	0.0111559
FBgn0037004	FBgn0037004	FBgn0037004	CG17637	-0.801047	-0.801695	3.36592	0.00135471	0.0112241
FBgn0052441	FBgn0052441	FBgn0052441	CG32441	-0.711019	-0.711556	3.59761	0.00136772	0.0113201
FBgn0052544	FBgn0052544	FBgn0052544	CG32544	0.747827	0.748345	3.86083	0.00138181	0.0114229
FBgn0030789	FBgn0030789	FBgn0030789	Rrp45	0.861877	0.86367	2.26185	0.00138386	0.0114229
FBgn0030763	FBgn0030763	FBgn0030763	CG9782	-0.806813	-0.808279	2.84745	0.00138447	0.0114229
FBgn0035247	FBgn0035247	FBgn0035247	metl	0.881428	0.882474	3.13347	0.00139509	0.0114986
FBgn0030678	FBgn0030678	FBgn0030678	CG11679	0.83256	0.834418	2.12483	0.00139869	0.0115163
FBgn0267163	FBgn0267163	FBgn0267163	CG45603	1.18477	1.18962	1.5806	0.00140359	0.0115447
FBgn0270927	FBgn0270927	FBgn0270927	betaGlu	0.702468	0.70295	3.62792	0.00140565	0.0115496
FBgn0035696	FBgn0035696	FBgn0035696	Best2	-0.612132	-0.612283	5.35455	0.00140917	0.0115666
FBgn0030234	FBgn0030234	FBgn0030234	CG15211	-0.738654	-0.739664	3.0546	0.00141743	0.0116223
FBgn0264389	FBgn0264389	FBgn0264389	opm	0.704042	0.704952	2.87739	0.00142479	0.0116706
FBgn0039069	FBgn0039069	FBgn0039069	CG6763	-0.882676	-0.885097	1.98662	0.00142848	0.0116888
FBgn0043534	FBgn0043534	FBgn0043534	Obp57b	-0.816646	-0.817889	2.85622	0.00143327	0.0117159
FBgn0003346	FBgn0003346	FBgn0003346	RanGAP	0.755086	0.755746	3.24821	0.00145463	0.0118782
FBgn0037726	FBgn0037726	FBgn0037726	CG9492	-1.13999	-1.14093	4.20612	0.00146024	0.0119118
FBgn0030961	FBgn0030961	FBgn0030961	CG7058	-0.697549	-0.697873	4.30615	0.00146716	0.0119559
FBgn0024806	FBgn0024806	FBgn0024806	DIP2	-0.535456	-0.535463	9.3461	0.00146874	0.0119565
FBgn0259236	FBgn0259236	FBgn0259236	comm3	-0.798249	-0.799168	3.41842	0.00147164	0.0119678
FBgn0036309	FBgn0036309	FBgn0036309	Hip1	0.664076	0.664281	4.76621	0.00147661	0.0119959
FBgn0032194	FBgn0032194	FBgn0032194	CG4901	0.77907	0.779798	3.17152	0.00148367	0.012041
FBgn0039465	FBgn0039465	FBgn0039465	Tsp97E	-0.657365	-0.657398	7.95362	0.00148561	0.0120444
FBgn0037005	FBgn0037005	FBgn0037005	CG5078	-0.699701	-0.70007	4.05831	0.00149581	0.0121147
FBgn0026872	FBgn0026872	FBgn0026872	CG14777	0.661502	0.66183	4.2073	0.00152249	0.0123068
FBgn0033205	FBgn0033205	FBgn0033205	CG2064	0.760179	0.76123	2.77546	0.00152263	0.0123068
FBgn0067102	FBgn0067102	FBgn0067102	GlcT	0.893852	0.893907	7.02329	0.00153654	0.0124066
FBgn0020369	FBgn0020369	FBgn0020369	Rpt6	0.696457	0.696739	4.28901	0.00155812	0.012568
FBgn0052380	FBgn0052380	FBgn0052380	SMSr	0.603742	0.603913	4.89439	0.00155981	0.0125689
FBgn0004837	FBgn0004837	FBgn0004837	Su(H)	0.706278	0.706661	4.07584	0.0015725	0.0126427
FBgn0013548	FBgn0013548	FBgn0013548	l(2)dtl	0.785365	0.786105	3.25967	0.00157302	0.0126427
FBgn0035169	FBgn0035169	FBgn0035169	Dci	0.8104	0.811649	2.64886	0.00157375	0.0126427
FBgn0032876	FBgn0032876	FBgn0032876	Cen	0.648143	0.648322	4.98795	0.00158011	0.0126809
FBgn0025866	FBgn0025866	FBgn0025866	CalpB	0.657452	0.657488	7.07327	0.00158981	0.0127458
FBgn0041582	FBgn0041582	FBgn0041582	tamo	0.581997	0.582032	7.15434	0.0016008	0.0128209
FBgn0014342	FBgn0014342	FBgn0014342	mia	0.906307	0.908209	2.28506	0.00160597	0.0128494
FBgn0085447	FBgn0085447	FBgn0085447	sif	-0.675979	-0.676004	8.14153	0.00161899	0.0129405
FBgn0005642	FBgn0005642	FBgn0005642	wdn	0.650558	0.650699	5.40207	0.00162246	0.0129551
FBgn0034381	FBgn0034381	FBgn0034381	List	-0.700191	-0.700532	4.20699	0.00165651	0.0132138
FBgn0086346	FBgn0086346	FBgn0086346	ALiX	0.650549	0.650572	7.84854	0.0016706	0.0133127
FBgn0036896	FBgn0036896	FBgn0036896	wnd	-0.555016	-0.555023	9.63342	0.0016726	0.0133153
FBgn0034933	FBgn0034933	FBgn0034933	CG3735	0.830351	0.831007	3.42453	0.00167915	0.0133541
FBgn0261004	FBgn0261004	FBgn0261004	asl	0.97528	0.978076	1.91096	0.0017078	0.0135683
FBgn0031745	FBgn0031745	FBgn0031745	rau	-0.870625	-0.873088	2.08181	0.00171133	0.0135827
FBgn0035286	FBgn0035286	FBgn0035286	CG13924	-0.929575	-0.930068	4.83995	0.00171513	0.0135992
FBgn0033443	FBgn0033443	FBgn0033443	CG1698	1.48975	1.49034	5.53384	0.00172507	0.0136644
FBgn0031937	FBgn0031937	FBgn0031937	CG13795	-0.809594	-0.810541	3.28865	0.0017277	0.0136659
FBgn0035911	FBgn0035911	FBgn0035911	CG6638	0.711945	0.712979	3.00281	0.00172871	0.0136659
FBgn0030511	FBgn0030511	FBgn0030511	CG11158	0.693891	0.694587	3.28489	0.00173834	0.0137284
FBgn0032643	FBgn0032643	FBgn0032643	GCS2beta	0.651699	0.652063	4.10081	0.00174905	0.0137992
FBgn0260856	FBgn0260856	FBgn0260856	Membrin	0.707805	0.708459	3.35487	0.00175233	0.0138114
FBgn0052843	FBgn0052843	FBgn0052843	Dh31-R	-0.67181	-0.672052	4.60425	0.00177625	0.0139859
FBgn0032637	FBgn0032637	FBgn0032637	CG5050	0.921235	0.922314	3.42956	0.00178046	0.0140052
FBgn0052091	FBgn0052091	FBgn0052091	CG32091	-0.761	-0.761904	3.12897	0.00179012	0.0140652
FBgn0030503	FBgn0030503	FBgn0030503	Tango2	0.728854	0.72969	3.03673	0.00179329	0.0140652
FBgn0040323	FBgn0040323	FBgn0040323	GNBP1	0.777189	0.778248	2.77372	0.00179341	0.0140652
FBgn0000286	FBgn0000286	FBgn0000286	Cf2	0.546319	0.546349	7.40838	0.00179762	0.0140843
FBgn0031776	FBgn0031776	FBgn0031776	Pfdn1	0.719854	0.720727	3.05767	0.00180239	0.0141078
FBgn0022936	FBgn0022936	FBgn0022936	CycH	0.838143	0.839518	2.47582	0.00182277	0.014227
FBgn0015872	FBgn0015872	FBgn0015872	Drip	-0.736913	-0.737529	3.72547	0.00182286	0.014227
FBgn0033454	FBgn0033454	FBgn0033454	CG1671	0.715784	0.716533	3.04334	0.00182301	0.014227
FBgn0034175	FBgn0034175	FBgn0034175	ste24b	0.762569	0.763816	2.287	0.001826	0.0142364
FBgn0036820	FBgn0036820	FBgn0036820	Grx1	-0.998745	-1.00206	1.59921	0.00183621	0.0143019
FBgn0086681	FBgn0086681	FBgn0086681	Mst36Fa	0.814967	0.816866	2.18658	0.00184427	0.0143389
FBgn0030447	FBgn0030447	FBgn0030447	CG2200	0.745226	0.74621	2.71086	0.00184543	0.0143389
FBgn0032524	FBgn0032524	FBgn0032524	Hacd2	-0.610814	-0.611077	4.39364	0.00184639	0.0143389
FBgn0003390	FBgn0003390	FBgn0003390	shf	0.729828	0.730609	3.35449	0.00187704	0.0145627
FBgn0032322	FBgn0032322	FBgn0032322	CG16743	-0.833721	-0.836306	2.02631	0.00187935	0.0145664
FBgn0033917	FBgn0033917	FBgn0033917	SmydA-1	-0.809121	-0.810077	3.11404	0.00188253	0.0145768
FBgn0020545	FBgn0020545	FBgn0020545	kraken	0.692453	0.692643	5.11316	0.001894	0.014651
FBgn0027580	FBgn0027580	FBgn0027580	PCB	0.607672	0.607681	9.18931	0.00189581	0.014651
FBgn0027330	FBgn0027330	FBgn0027330	l(1)G0020	0.784652	0.785872	2.505	0.0019082	0.0147297
FBgn0263601	FBgn0263601	FBgn0263601	mib1	0.616835	0.616893	6.37611	0.00191109	0.0147297
FBgn0002526	FBgn0002526	FBgn0002526	LanA	-0.618715	-0.618824	5.56489	0.00191157	0.0147297
FBgn0038854	FBgn0038854	FBgn0038854	CG7044	0.83427	0.83453	4.85791	0.00192436	0.0148139
FBgn0033186	FBgn0033186	FBgn0033186	CG1602	0.819716	0.821612	1.9246	0.00192657	0.0148164
FBgn0029882	FBgn0029882	FBgn0029882	CG3226	0.717298	0.717874	3.49768	0.0019393	0.0148999
FBgn0053113	FBgn0053113	FBgn0053113	Rtnl1	0.627076	0.627084	9.12319	0.00194446	0.0149251
FBgn0015558	FBgn0015558	FBgn0015558	tty	0.617173	0.617203	7.25214	0.00194996	0.0149528
FBgn0035987	FBgn0035987	FBgn0035987	Cpsf5	0.651609	0.651695	5.97079	0.00196599	0.0150612
FBgn0038584	FBgn0038584	FBgn0038584	mTerf5	0.78856	0.789321	3.14718	0.00196843	0.0150653
FBgn0038438	FBgn0038438	FBgn0038438	Der-2	0.645183	0.645575	3.94538	0.00197195	0.0150778
FBgn0030786	FBgn0030786	FBgn0030786	mRpL22	0.703457	0.704048	3.40117	0.00197683	0.0151005
FBgn0021776	FBgn0021776	FBgn0021776	mira	0.67073	0.671164	3.88379	0.00198253	0.015127
FBgn0037020	FBgn0037020	FBgn0037020	Pex14	0.700368	0.701108	3.18583	0.00198412	0.015127
FBgn0029766	FBgn0029766	FBgn0029766	CG15784	0.679797	0.679895	6.08163	0.00198687	0.0151335
FBgn0034200	FBgn0034200	FBgn0034200	Gbp2	-0.637754	-0.638004	4.74709	0.00199137	0.0151531
FBgn0027655	FBgn0027655	FBgn0027655	htt	0.513003	0.513012	8.77974	0.00200319	0.0152285
FBgn0003557	FBgn0003557	FBgn0003557	Su(dx)	0.51893	0.518948	7.84081	0.00200578	0.0152336
FBgn0051549	FBgn0051549	FBgn0051549	CG31549	0.687073	0.687915	2.96936	0.0020089	0.0152427
FBgn0031054	FBgn0031054	FBgn0031054	Ssu72	0.680686	0.680991	4.33495	0.00201115	0.0152451
FBgn0035268	FBgn0035268	FBgn0035268	CG8001	0.628352	0.628528	4.98235	0.00202341	0.0153173
FBgn0002021	FBgn0002021	FBgn0002021	l(2)37Bb	0.715882	0.716762	2.75113	0.00202454	0.0153173
FBgn0002534	FBgn0002534	FBgn0002534	Lcp3	0.756742	0.758291	2.52728	0.00204046	0.0154231
FBgn0039114	FBgn0039114	FBgn0039114	Lsd-1	-0.717077	-0.717213	5.72417	0.00205275	0.0155012
FBgn0033479	FBgn0033479	FBgn0033479	PIG-N	0.792332	0.79334	2.76564	0.00205529	0.0155056
FBgn0030792	FBgn0030792	FBgn0030792	CG4789	0.80364	0.804173	3.84409	0.00205961	0.0155209
FBgn0038524	FBgn0038524	FBgn0038524	sll	0.675665	0.676027	3.95562	0.00206124	0.0155209
FBgn0038324	FBgn0038324	FBgn0038324	CG5038	0.820744	0.822425	2.05741	0.00206729	0.0155438
FBgn0023515	FBgn0023515	FBgn0023515	CG14814	0.647447	0.647966	3.60733	0.00206912	0.0155438
FBgn0037057	FBgn0037057	FBgn0037057	CG10512	0.715633	0.715808	5.28556	0.00207016	0.0155438
FBgn0037044	FBgn0037044	FBgn0037044	Pdss2	0.626483	0.626772	4.21776	0.00207622	0.0155746
FBgn0053054	FBgn0053054	FBgn0053054	CG33054	0.890885	0.893055	1.93735	0.00208019	0.015588
FBgn0030566	FBgn0030566	FBgn0030566	betaNACtes4	0.768175	0.769621	2.3804	0.00208194	0.015588
FBgn0036402	FBgn0036402	FBgn0036402	CG6650	0.630776	0.631153	3.92626	0.00208729	0.0156133
FBgn0039347	FBgn0039347	FBgn0039347	CG5071	-1.72323	-1.72351	6.82645	0.00211041	0.0157714
FBgn0263048	FBgn0263048	FBgn0263048	Gpdh3	0.589906	0.59007	5.09066	0.00212349	0.0158542
FBgn0033556	FBgn0033556	FBgn0033556	CG12343	0.791836	0.792967	2.63274	0.00214606	0.0160076
FBgn0002707	FBgn0002707	FBgn0002707	mei-9	0.708358	0.708734	3.89948	0.00216346	0.0161222
FBgn0261928	FBgn0261928	FBgn0261928	CG42795	0.589368	0.58937	11.3931	0.00216671	0.0161313
FBgn0034081	FBgn0034081	FBgn0034081	CG10731	-0.901631	-0.90513	1.29963	0.0021738	0.0161689
FBgn0034485	FBgn0034485	FBgn0034485	CG11099	0.650137	0.650338	4.75446	0.00217968	0.0161974
FBgn0039044	FBgn0039044	FBgn0039044	p53	0.803394	0.803955	3.93992	0.00219013	0.0162599
FBgn0034351	FBgn0034351	FBgn0034351	rswl	0.731894	0.732925	2.59235	0.00221142	0.0163944
FBgn0262139	FBgn0262139	FBgn0262139	trh	-0.643907	-0.644097	5.05101	0.00221239	0.0163944
FBgn0040377	FBgn0040377	FBgn0040377	Vha36-3	-0.863201	-0.864542	3.00902	0.00222929	0.0164902
FBgn0010238	FBgn0010238	FBgn0010238	Lac	0.621159	0.621212	6.56241	0.00222948	0.0164902
FBgn0035254	FBgn0035254	FBgn0035254	CG7974	0.791321	0.792957	2.17439	0.00224437	0.0165849
FBgn0004133	FBgn0004133	FBgn0004133	blow	0.736895	0.736987	6.13994	0.00225354	0.0166372
FBgn0038547	FBgn0038547	FBgn0038547	CG17803	-0.77923	-0.779912	3.70182	0.00228715	0.0168696
FBgn0020767	FBgn0020767	FBgn0020767	Spred	-0.558049	-0.558079	7.4061	0.00229092	0.0168817
FBgn0032474	FBgn0032474	FBgn0032474	DnaJ-H	0.577441	0.577552	5.68138	0.00231141	0.0170169
FBgn0036259	FBgn0036259	FBgn0036259	CG9760	-0.85218	-0.853643	2.56846	0.0023141	0.0170209
FBgn0031047	FBgn0031047	FBgn0031047	Rcd-1	0.615371	0.615545	4.97125	0.0023203	0.0170506
FBgn0002638	FBgn0002638	FBgn0002638	Rcc1	0.708479	0.709009	3.63655	0.00232378	0.0170604
FBgn0036560	FBgn0036560	FBgn0036560	CG5895	-0.767067	-0.768436	2.59901	0.00235324	0.0172607
FBgn0061356	FBgn0061356	FBgn0061356	CG18003	-0.777312	-0.778326	2.99884	0.00236885	0.0173588
FBgn0036263	FBgn0036263	FBgn0036263	thoc6	0.644877	0.645493	3.29101	0.00237099	0.0173588
FBgn0038966	FBgn0038966	FBgn0038966	pinta	0.720778	0.721378	3.2928	0.00238262	0.0174245
FBgn0043364	FBgn0043364	FBgn0043364	cbt	0.796693	0.796737	7.53098	0.00238436	0.0174245
FBgn0036484	FBgn0036484	FBgn0036484	Pex3	0.5927	0.592961	4.47441	0.0023873	0.0174299
FBgn0040475	FBgn0040475	FBgn0040475	SH3PX1	0.663547	0.663657	5.58018	0.00242606	0.0176966
FBgn0250746	FBgn0250746	FBgn0250746	Prosbeta7	0.652962	0.653333	4.01663	0.00244203	0.0177828
FBgn0029723	FBgn0029723	FBgn0029723	Proc-R	-0.656558	-0.656941	4.19972	0.00244348	0.0177828
FBgn0038236	FBgn0038236	FBgn0038236	Cyp313a1	-0.729834	-0.729917	6.3285	0.00244461	0.0177828
FBgn0285913	FBgn0285913	FBgn0285913	red	0.559367	0.559422	6.59373	0.00246711	0.01793
FBgn0041181	FBgn0041181	FBgn0041181	Tep3	-0.596958	-0.597129	5.18869	0.00247466	0.0179685
FBgn0034061	FBgn0034061	FBgn0034061	Ufc1	-0.734052	-0.735424	2.62755	0.00249114	0.0180664
FBgn0050109	FBgn0050109	FBgn0050109	CG30109	0.731993	0.732432	3.8788	0.0024927	0.0180664
FBgn0050372	FBgn0050372	FBgn0050372	Asap	0.558451	0.558473	7.67482	0.00249604	0.018074
FBgn0039175	FBgn0039175	FBgn0039175	beta-PheRS	0.865685	0.866019	4.5532	0.00250355	0.0181119
FBgn0037935	FBgn0037935	FBgn0037935	CG6834	-0.672214	-0.672852	3.27447	0.00252032	0.0182166
FBgn0038930	FBgn0038930	FBgn0038930	CG5778	-1.07406	-1.07473	3.88476	0.00253098	0.018274
FBgn0036804	FBgn0036804	FBgn0036804	Sgf11	0.797555	0.799395	2.21141	0.00253286	0.018274
FBgn0037660	FBgn0037660	FBgn0037660	beag	0.665635	0.66597	4.2026	0.00253837	0.0182874
FBgn0262123	FBgn0262123	FBgn0262123	l(2)41Ab	-0.828957	-0.830778	2.60117	0.00253935	0.0182874
FBgn0039328	FBgn0039328	FBgn0039328	CHKov2	-0.659167	-0.659834	3.62198	0.00254164	0.0182874
FBgn0035443	FBgn0035443	FBgn0035443	CG12010	0.726945	0.727945	2.54768	0.00254948	0.0183271
FBgn0028497	FBgn0028497	FBgn0028497	CG3530	-0.601331	-0.601352	7.85445	0.0026272	0.0188687
FBgn0037026	FBgn0037026	FBgn0037026	CG3634	0.593518	0.593807	4.13476	0.00263007	0.0188722
FBgn0036702	FBgn0036702	FBgn0036702	CG6512	0.686624	0.686688	6.54472	0.00263654	0.0189015
FBgn0013763	FBgn0013763	FBgn0013763	Idgf6	-0.549435	-0.549489	6.60751	0.00264495	0.0189448
FBgn0038325	FBgn0038325	FBgn0038325	Atg4b	0.576504	0.576685	4.74232	0.00264744	0.0189454
FBgn0040827	FBgn0040827	FBgn0040827	CG13315	-0.836084	-0.836587	4.11204	0.00265389	0.0189744
FBgn0035690	FBgn0035690	FBgn0035690	CG10274	0.654832	0.655118	4.35469	0.00266065	0.0190057
FBgn0029783	FBgn0029783	FBgn0029783	Sirt4	0.841969	0.842829	3.36339	0.00271432	0.0193716
FBgn0000567	FBgn0000567	FBgn0000567	Eip74EF	0.577115	0.577129	8.65148	0.00272251	0.0194126
FBgn0260007	FBgn0260007	FBgn0260007	CG42493	-0.66777	-0.668334	3.61113	0.00272919	0.0194428
FBgn0036889	FBgn0036889	FBgn0036889	CG14100	0.913942	0.915824	2.37458	0.00273206	0.0194457
FBgn0037980	FBgn0037980	FBgn0037980	DCAF12	0.758894	0.759417	3.68596	0.00274269	0.0194892
FBgn0259697	FBgn0259697	FBgn0259697	nvd	-0.870234	-0.871053	4.15145	0.00274345	0.0194892
FBgn0033760	FBgn0033760	FBgn0033760	CG8785	-0.773743	-0.775212	2.44926	0.00274555	0.0194892
FBgn0031099	FBgn0031099	FBgn0031099	CG17065	0.600587	0.600716	5.44472	0.00276009	0.0195749
FBgn0036569	FBgn0036569	FBgn0036569	IleRS-m	0.71348	0.714383	2.83389	0.00277306	0.0196493
FBgn0260750	FBgn0260750	FBgn0260750	Mulk	0.714276	0.715449	2.48476	0.00281984	0.0199629
FBgn0025381	FBgn0025381	FBgn0025381	rush	0.597608	0.597723	5.55224	0.00284262	0.0201063
FBgn0025836	FBgn0025836	FBgn0025836	RhoGAP1A	-0.501179	-0.501198	7.91003	0.00285234	0.020157
FBgn0004362	FBgn0004362	FBgn0004362	HmgD	0.599297	0.5996	4.26564	0.00285896	0.0201859
FBgn0052195	FBgn0052195	FBgn0052195	CG32195	-0.724956	-0.725946	2.73896	0.00286742	0.0202275
FBgn0016930	FBgn0016930	FBgn0016930	Dyrk2	-0.719951	-0.719964	9.27225	0.00287528	0.0202539
FBgn0004643	FBgn0004643	FBgn0004643	Zw10	0.646948	0.647368	3.90557	0.00287626	0.0202539
FBgn0011204	FBgn0011204	FBgn0011204	cue	-0.574649	-0.574762	5.60925	0.00290611	0.0204459
FBgn0015034	FBgn0015034	FBgn0015034	Cyp4e1	-0.806616	-0.80792	2.70755	0.00292951	0.0205729
FBgn0027558	FBgn0027558	FBgn0027558	Pgant3	0.596525	0.596648	5.4458	0.00293036	0.0205729
FBgn0035308	FBgn0035308	FBgn0035308	CG15822	-0.787419	-0.788634	2.97945	0.00293194	0.0205729
FBgn0010329	FBgn0010329	FBgn0010329	Tbh	-0.676531	-0.677001	3.62952	0.00293791	0.0205965
FBgn0010383	FBgn0010383	FBgn0010383	Cyp18a1	-0.768854	-0.769466	3.72814	0.00294749	0.0206455
FBgn0037906	FBgn0037906	FBgn0037906	PGRP-LB	-0.78931	-0.7912	2.58276	0.00297143	0.0207723
FBgn0037739	FBgn0037739	FBgn0037739	CG12948	0.636025	0.636379	4.16568	0.00297175	0.0207723
FBgn0058470	FBgn0058470	FBgn0058470	CG40470	-0.756883	-0.757531	3.49899	0.00297345	0.0207723
FBgn0032264	FBgn0032264	FBgn0032264	Lip4	-0.709058	-0.709534	4.29505	0.00298196	0.0208133
FBgn0052022	FBgn0052022	FBgn0052022	CG32022	0.699667	0.700846	2.28562	0.00299638	0.0208956
FBgn0034392	FBgn0034392	FBgn0034392	MFS15	0.763658	0.764314	3.19577	0.00301706	0.0210041
FBgn0031635	FBgn0031635	FBgn0031635	tank	0.657916	0.658086	5.18763	0.00301724	0.0210041
FBgn0034988	FBgn0034988	FBgn0034988	cN-IIIB	0.69903	0.700183	2.6193	0.0030318	0.0210791
FBgn0024991	FBgn0024991	FBgn0024991	CG2694	0.740128	0.741093	2.72831	0.00303332	0.0210791
FBgn0030673	FBgn0030673	FBgn0030673	CG15601	0.764686	0.766196	2.35943	0.00304777	0.0211609
FBgn0038020	FBgn0038020	FBgn0038020	GstD9	0.685466	0.686428	2.95334	0.00306168	0.0212305
FBgn0051119	FBgn0051119	FBgn0051119	HDAC11	0.704408	0.705562	2.69465	0.00306314	0.0212305
FBgn0262870	FBgn0262870	FBgn0262870	axo	-0.541222	-0.541267	6.80137	0.00308157	0.0213396
FBgn0034808	FBgn0034808	FBgn0034808	CG9896	-0.691845	-0.692275	3.98553	0.00308857	0.0213694
FBgn0031835	FBgn0031835	FBgn0031835	CG11319	-0.623576	-0.623615	7.34115	0.00309331	0.0213835
FBgn0037184	FBgn0037184	FBgn0037184	CG14450	0.687543	0.688176	3.33931	0.00310223	0.0214265
FBgn0039680	FBgn0039680	FBgn0039680	Cap-D2	0.84052	0.842196	2.2027	0.00311211	0.0214494
FBgn0038956	FBgn0038956	FBgn0038956	CAH8	0.998754	1.00063	2.73901	0.00311289	0.0214494
FBgn0037875	FBgn0037875	FBgn0037875	ZnT86D	0.630726	0.631161	3.79776	0.00311554	0.0214494
FBgn0265276	FBgn0265276	FBgn0265276	l(3)neo38	0.521278	0.521301	7.61709	0.00311637	0.0214494
FBgn0022800	FBgn0022800	FBgn0022800	Cad96Ca	-0.653884	-0.654163	4.6286	0.00313844	0.0215826
FBgn0037200	FBgn0037200	FBgn0037200	CG11109	0.747399	0.748544	2.52514	0.00314499	0.0216088
FBgn0002891	FBgn0002891	FBgn0002891	DNApol-zeta	0.617334	0.617413	6.05795	0.00315742	0.0216755
FBgn0035065	FBgn0035065	FBgn0035065	CG3589	0.647092	0.647571	3.62017	0.00317258	0.0217607
FBgn0031077	FBgn0031077	FBgn0031077	THADA	0.680126	0.680361	4.63501	0.00318628	0.0218206
FBgn0030189	FBgn0030189	FBgn0030189	CG2909	0.688484	0.688924	3.79578	0.00318682	0.0218206
FBgn0052141	FBgn0052141	FBgn0052141	saturn	-0.767255	-0.76907	2.17043	0.0031916	0.0218345
FBgn0087002	FBgn0087002	FBgn0087002	apolpp	-0.656651	-0.656654	10.8023	0.00320654	0.0219178
FBgn0038248	FBgn0038248	FBgn0038248	CG7886	-0.853078	-0.85528	2.22929	0.003214	0.0219329
FBgn0004449	FBgn0004449	FBgn0004449	Ten-m	0.556185	0.556197	8.38897	0.00321428	0.0219329
FBgn0000633	FBgn0000633	FBgn0000633	CG17716	0.580916	0.580933	8.36363	0.00327925	0.022357
FBgn0026439	FBgn0026439	FBgn0026439	Eaat1	-0.633638	-0.633671	8.16254	0.00328664	0.0223783
FBgn0027526	FBgn0027526	FBgn0027526	Ublcp1	0.69581	0.696707	2.9802	0.00328802	0.0223783
FBgn0267348	FBgn0267348	FBgn0267348	LanB2	-0.693052	-0.693535	3.79898	0.00329166	0.0223839
FBgn0284220	FBgn0284220	FBgn0284220	Top2	0.569058	0.56916	5.63005	0.00329599	0.0223941
FBgn0051633	FBgn0051633	FBgn0051633	CG31633	0.702435	0.703468	2.42286	0.00333542	0.0226426
FBgn0008646	FBgn0008646	FBgn0008646	E5	-0.80837	-0.809926	2.49879	0.00334061	0.0226584
FBgn0036931	FBgn0036931	FBgn0036931	CG14183	-0.802234	-0.802962	4.07836	0.00334831	0.0226845
FBgn0261239	FBgn0261239	FBgn0261239	Hr39	0.531628	0.531674	6.62841	0.00335017	0.0226845
FBgn0033391	FBgn0033391	FBgn0033391	CG8026	-0.909233	-0.910968	3.45435	0.00338663	0.0229118
FBgn0003257	FBgn0003257	FBgn0003257	r-l	0.838043	0.839293	2.73207	0.00340358	0.0230068
FBgn0039430	FBgn0039430	FBgn0039430	CG5455	-0.665982	-0.665991	9.38289	0.00341842	0.0230766
FBgn0051075	FBgn0051075	FBgn0051075	CG31075	-0.70921	-0.709528	4.39892	0.00342155	0.0230766
FBgn0051694	FBgn0051694	FBgn0051694	CG31694	0.579742	0.579766	7.5919	0.00342264	0.0230766
FBgn0039273	FBgn0039273	FBgn0039273	shams	0.679637	0.680373	3.30244	0.00342771	0.0230912
FBgn0024985	FBgn0024985	FBgn0024985	Rilpl	0.632035	0.632044	9.0122	0.00343941	0.0231391
FBgn0031036	FBgn0031036	FBgn0031036	CG14220	0.646143	0.646462	4.28159	0.00344066	0.0231391
FBgn0031801	FBgn0031801	FBgn0031801	CG9498	-0.64788	-0.64841	3.74802	0.00345157	0.0231928
FBgn0263706	FBgn0263706	FBgn0263706	CG43658	0.567584	0.567626	7.06354	0.00346489	0.0232497
FBgn0015520	FBgn0015520	FBgn0015520	nonA-l	0.623206	0.623434	4.74488	0.0034659	0.0232497
FBgn0032986	FBgn0032986	FBgn0032986	CG3262	-0.53109	-0.53111	8.27565	0.00347639	0.0233003
FBgn0019982	FBgn0019982	FBgn0019982	Gs1l	0.679865	0.680006	5.42042	0.00351975	0.0235711
FBgn0036992	FBgn0036992	FBgn0036992	Hpd	-0.673768	-0.673818	7.21846	0.00352425	0.0235813
FBgn0266346	FBgn0266346	FBgn0266346	CngB	0.611236	0.611376	5.21894	0.00352738	0.0235823
FBgn0001085	FBgn0001085	FBgn0001085	fz	-0.555924	-0.556119	4.65908	0.00353264	0.0235976
FBgn0263930	FBgn0263930	FBgn0263930	dally	-0.535251	-0.535312	6.32251	0.00354813	0.0236811
FBgn0259226	FBgn0259226	FBgn0259226	CG42326	-0.712219	-0.712844	3.79711	0.00355427	0.0237021
FBgn0031484	FBgn0031484	FBgn0031484	CG3165	0.693994	0.694988	2.73162	0.00358784	0.0238809
FBgn0038768	FBgn0038768	FBgn0038768	CG4936	0.722104	0.72247	4.15169	0.00358995	0.0238809
FBgn0013987	FBgn0013987	FBgn0013987	MAPk-Ak2	0.534945	0.535023	6.07699	0.00359012	0.0238809
FBgn0035462	FBgn0035462	FBgn0035462	IntS10	0.816773	0.818147	2.31449	0.003606	0.0239664
FBgn0011297	FBgn0011297	FBgn0011297	Alg3	0.780223	0.78149	2.49379	0.00362296	0.0240392
FBgn0013678	FBgn0013678	FBgn0013678	mt:Cyt-b	-1.3332	-1.33339	6.51452	0.003623	0.0240392
FBgn0015229	FBgn0015229	FBgn0015229	glec	0.572318	0.572454	5.58422	0.00365382	0.0242233
FBgn0260653	FBgn0260653	FBgn0260653	serp	-0.738352	-0.73921	3.66528	0.00371169	0.0245865
FBgn0037656	FBgn0037656	FBgn0037656	CG11986	0.819411	0.821449	1.86057	0.00371909	0.0246083
FBgn0030617	FBgn0030617	FBgn0030617	CG9095	-0.699824	-0.700447	3.60142	0.0037212	0.0246083
FBgn0039335	FBgn0039335	FBgn0039335	Vps33B	0.724021	0.724713	3.16175	0.00374507	0.0247351
FBgn0260648	FBgn0260648	FBgn0260648	Rrp40	0.813172	0.815167	1.93944	0.0037466	0.0247351
FBgn0086358	FBgn0086358	FBgn0086358	Tab2	0.49808	0.498099	7.88692	0.00378349	0.0249566
FBgn0051522	FBgn0051522	FBgn0051522	CG31522	-0.802544	-0.802588	7.79752	0.00378646	0.0249566
FBgn0035245	FBgn0035245	FBgn0035245	GC	-0.78028	-0.780603	4.86125	0.00379189	0.0249648
FBgn0028888	FBgn0028888	FBgn0028888	CG4168	0.59674	0.596759	8.34296	0.00379399	0.0249648
FBgn0039204	FBgn0039204	FBgn0039204	CG6607	0.609255	0.609505	4.45381	0.00382132	0.0251238
FBgn0035370	FBgn0035370	FBgn0035370	Non2	0.670456	0.670803	4.14971	0.00382979	0.0251586
FBgn0039321	FBgn0039321	FBgn0039321	CG10550	-0.728906	-0.729552	3.73063	0.00384495	0.0252197
FBgn0034290	FBgn0034290	FBgn0034290	CG5773	0.683194	0.683888	3.59609	0.00384545	0.0252197
FBgn0034275	FBgn0034275	FBgn0034275	CG5002	-0.79594	-0.797407	2.655	0.00385873	0.0252859
FBgn0036519	FBgn0036519	FBgn0036519	CG7650	0.617902	0.618208	4.32893	0.00392681	0.0256982
FBgn0261850	FBgn0261850	FBgn0261850	Xpd	0.703705	0.704584	2.81369	0.00392814	0.0256982
FBgn0036194	FBgn0036194	FBgn0036194	Dph1	-0.626514	-0.626564	6.90831	0.0039335	0.025712
FBgn0086532	FBgn0086532	FBgn0086532	Spt-I	0.591725	0.591873	4.94833	0.00394636	0.0257748
FBgn0036317	FBgn0036317	FBgn0036317	CG10948	0.499973	0.500009	6.95035	0.00395223	0.0257788
FBgn0036179	FBgn0036179	FBgn0036179	CG7368	0.583713	0.584057	4.30168	0.00395346	0.0257788
FBgn0035977	FBgn0035977	FBgn0035977	PGRP-LF	-0.812715	-0.814879	2.24212	0.00397372	0.0258896
FBgn0037475	FBgn0037475	FBgn0037475	Fer1	-0.764894	-0.766555	2.07675	0.00398791	0.0259607
FBgn0030749	FBgn0030749	FBgn0030749	AnxB11	0.616329	0.616485	5.11799	0.00405747	0.0263919
FBgn0261396	FBgn0261396	FBgn0261396	Rpn3	0.674007	0.674241	4.70822	0.00406319	0.0264074
FBgn0037721	FBgn0037721	FBgn0037721	CG9427	0.676607	0.67694	4.43484	0.00407674	0.0264475
FBgn0034198	FBgn0034198	FBgn0034198	CG11400	-0.685381	-0.686127	3.17035	0.00407737	0.0264475
FBgn0261873	FBgn0261873	FBgn0261873	sdt	0.480112	0.480115	10.4951	0.00407937	0.0264475
FBgn0040383	FBgn0040383	FBgn0040383	CG5254	0.737123	0.737399	4.45616	0.00410702	0.0266051
FBgn0261673	FBgn0261673	FBgn0261673	nemy	-0.717068	-0.71766	3.73637	0.00411853	0.0266537
FBgn0052816	FBgn0052816	FBgn0052816	CG32816	-0.795086	-0.796493	2.4762	0.00412126	0.0266537
FBgn0029826	FBgn0029826	FBgn0029826	CG6041	-0.648143	-0.648564	3.83399	0.00417371	0.0269709
FBgn0036847	FBgn0036847	FBgn0036847	CNPYb	0.675388	0.676376	2.74473	0.00419818	0.027107
FBgn0260026	FBgn0260026	FBgn0260026	CG42494	-0.779733	-0.780207	4.39138	0.00420429	0.0271243
FBgn0037535	FBgn0037535	FBgn0037535	PIG-H	0.739795	0.740919	2.88507	0.00421171	0.0271501
FBgn0029082	FBgn0029082	FBgn0029082	hbs	-0.669009	-0.669373	4.0393	0.00421855	0.0271721
FBgn0010341	FBgn0010341	FBgn0010341	Cdc42	0.584908	0.584991	5.80421	0.00423438	0.027252
FBgn0264432	FBgn0264432	FBgn0264432	CG43850	-0.692773	-0.693557	2.84008	0.00425239	0.0273457
FBgn0039004	FBgn0039004	FBgn0039004	Nup133	0.701008	0.701635	3.35086	0.00426356	0.0273953
FBgn0034442	FBgn0034442	FBgn0034442	CG11257	0.767454	0.768621	2.67949	0.00427069	0.0274111
FBgn0034435	FBgn0034435	FBgn0034435	fest	0.846308	0.847301	3.05143	0.00427293	0.0274111
FBgn0040268	FBgn0040268	FBgn0040268	Top3alpha	0.671809	0.672297	3.72312	0.0042885	0.0274621
FBgn0003174	FBgn0003174	FBgn0003174	pwn	-0.658011	-0.658614	3.52326	0.00428938	0.0274621
FBgn0038621	FBgn0038621	FBgn0038621	CG10864	0.653788	0.654073	4.44666	0.00429139	0.0274621
FBgn0262127	FBgn0262127	FBgn0262127	kibra	0.592428	0.592471	7.09234	0.00429474	0.0274621
FBgn0283741	FBgn0283741	FBgn0283741	prage	0.600991	0.601044	6.74653	0.00430408	0.0274996
FBgn0026411	FBgn0026411	FBgn0026411	Lim1	-0.570488	-0.570808	4.15575	0.00433311	0.0276628
FBgn0035918	FBgn0035918	FBgn0035918	Cdc6	-2.80685	-2.8071	7.80404	0.00433781	0.0276705
FBgn0030704	FBgn0030704	FBgn0030704	CG15916	0.68796	0.688669	3.42463	0.00434712	0.0277077
FBgn0000562	FBgn0000562	FBgn0000562	egl	0.567855	0.567904	6.80157	0.00436344	0.0277893
FBgn0013949	FBgn0013949	FBgn0013949	Elal	-0.697852	-0.698867	2.80448	0.00437648	0.02785
FBgn0039932	FBgn0039932	FBgn0039932	fuss	0.72269	0.723272	3.53218	0.00438399	0.0278754
FBgn0085443	FBgn0085443	FBgn0085443	spri	0.520378	0.520404	7.45539	0.00439849	0.0279452
FBgn0036377	FBgn0036377	FBgn0036377	CG10710	-0.941463	-0.942857	3.14425	0.00440405	0.0279582
FBgn0052815	FBgn0052815	FBgn0052815	CG32815	-0.565359	-0.565478	5.50074	0.00442682	0.0280802
FBgn0035159	FBgn0035159	FBgn0035159	CG13896	0.770507	0.771012	3.5183	0.00446407	0.0282939
FBgn0053056	FBgn0053056	FBgn0053056	CG33056	0.570681	0.570813	5.24361	0.00447576	0.0283453
FBgn0032908	FBgn0032908	FBgn0032908	CG9270	-0.692928	-0.693497	3.92265	0.00448745	0.0283966
FBgn0015296	FBgn0015296	FBgn0015296	Shc	0.598145	0.598422	4.46287	0.00449146	0.0283994
FBgn0052112	FBgn0052112	FBgn0052112	CG32112	0.58529	0.585545	4.32177	0.00450218	0.0284445
FBgn0041342	FBgn0041342	FBgn0041342	Pcyt1	-0.609488	-0.609508	8.39988	0.00450932	0.0284669
FBgn0031399	FBgn0031399	FBgn0031399	mio	0.622283	0.622546	4.52602	0.00452744	0.0285585
FBgn0036893	FBgn0036893	FBgn0036893	PIG-F	0.812704	0.813721	2.86255	0.0045361	0.0285904
FBgn0266721	FBgn0266721	FBgn0266721	gammaSnap2	0.772937	0.773869	3.22659	0.00454474	0.0286221
FBgn0030945	FBgn0030945	FBgn0030945	Ing3	0.625699	0.626003	4.17381	0.00455467	0.0286619
FBgn0031356	FBgn0031356	FBgn0031356	CG17660	0.515102	0.515178	5.92293	0.00456389	0.0286923
FBgn0015903	FBgn0015903	FBgn0015903	apt	0.693417	0.693778	3.88229	0.00456674	0.0286923
FBgn0029685	FBgn0029685	FBgn0029685	CG2938	0.544703	0.544827	5.17575	0.00457319	0.0287101
FBgn0086912	FBgn0086912	FBgn0086912	mbm	0.691799	0.6927	2.69738	0.00457908	0.0287243
FBgn0037817	FBgn0037817	FBgn0037817	Cyp12e1	-0.700296	-0.701055	3.14	0.0045937	0.0287932
FBgn0025702	FBgn0025702	FBgn0025702	Srpk79D	0.51093	0.510963	7.41529	0.00459733	0.0287932
FBgn0031690	FBgn0031690	FBgn0031690	CG7742	0.738571	0.738936	4.26392	0.00461046	0.0288527
FBgn0026189	FBgn0026189	FBgn0026189	prominin-like	0.524476	0.524513	6.91687	0.00461516	0.0288593
FBgn0001961	FBgn0001961	FBgn0001961	Arpc1	0.603065	0.603155	5.90534	0.00465664	0.0290958
FBgn0261090	FBgn0261090	FBgn0261090	Sytbeta	-0.63566	-0.636074	4.2262	0.00467145	0.0291653
FBgn0031228	FBgn0031228	FBgn0031228	ND-15	-0.644154	-0.644871	3.23637	0.0046792	0.0291907
FBgn0040512	FBgn0040512	FBgn0040512	zetaCOP	0.689307	0.689669	4.12607	0.00468405	0.029198
FBgn0036687	FBgn0036687	FBgn0036687	CG6652	1.17137	1.17289	3.10889	0.00470006	0.0292748
FBgn0261446	FBgn0261446	FBgn0261446	CG13377	-0.620375	-0.62092	3.66205	0.00471158	0.0293235
FBgn0032910	FBgn0032910	FBgn0032910	CG9265	0.561106	0.561237	5.46767	0.00473221	0.0294232
FBgn0015283	FBgn0015283	FBgn0015283	Rpn10	0.588092	0.588327	4.31527	0.00473502	0.0294232
FBgn0011290	FBgn0011290	FBgn0011290	Taf12	0.580941	0.581215	4.32139	0.00474178	0.0294421
FBgn0259700	FBgn0259700	FBgn0259700	CG42354	0.804242	0.805539	2.44547	0.00475377	0.0294934
FBgn0035497	FBgn0035497	FBgn0035497	CG14995	0.485369	0.485384	8.10186	0.00478853	0.0296787
FBgn0023214	FBgn0023214	FBgn0023214	edl	-0.793665	-0.795783	2.19755	0.00479112	0.0296787
FBgn0039296	FBgn0039296	FBgn0039296	Sil1	0.654617	0.655299	3.10162	0.00481615	0.0298105
FBgn0030263	FBgn0030263	FBgn0030263	CG2076	0.652522	0.652637	5.66628	0.00485828	0.0300401
FBgn0085399	FBgn0085399	FBgn0085399	CG34370	-0.639964	-0.640162	4.71189	0.00486081	0.0300401
FBgn0051997	FBgn0051997	FBgn0051997	CG31997	-0.666259	-0.666871	3.54782	0.00492547	0.0304159
FBgn0005619	FBgn0005619	FBgn0005619	Hdc	0.589298	0.589322	7.75755	0.0049865	0.0307688
FBgn0051643	FBgn0051643	FBgn0051643	CG31643	0.668219	0.669162	2.78916	0.00499439	0.0307935
FBgn0261286	FBgn0261286	FBgn0261286	Mat89Ba	0.579276	0.579369	5.7192	0.00501913	0.0309221
FBgn0028645	FBgn0028645	FBgn0028645	beat-Ib	-0.661096	-0.661555	3.64554	0.00503041	0.0309675
FBgn0010382	FBgn0010382	FBgn0010382	CycE	-0.670358	-0.671095	4.01556	0.0050456	0.0310369
FBgn0034542	FBgn0034542	FBgn0034542	Fem-1	0.491359	0.491443	5.70868	0.00508032	0.0312263
FBgn0033905	FBgn0033905	FBgn0033905	CG18324	0.629732	0.630321	3.52869	0.00509625	0.0312823
FBgn0037583	FBgn0037583	FBgn0037583	CG9684	0.684119	0.685045	2.73588	0.00509734	0.0312823
FBgn0015805	FBgn0015805	FBgn0015805	HDAC1	0.583633	0.583871	4.57172	0.00511131	0.0313439
FBgn0037138	FBgn0037138	FBgn0037138	P5CDh1	0.546289	0.546322	7.09896	0.0051166	0.031352
FBgn0031284	FBgn0031284	FBgn0031284	PGAP2	0.814198	0.815549	2.69853	0.00512151	0.0313579
FBgn0000097	FBgn0000097	FBgn0000097	aop	0.511789	0.511833	6.7448	0.00517464	0.0316588
FBgn0264442	FBgn0264442	FBgn0264442	ab	-0.628875	-0.628929	6.95122	0.00523915	0.0320287
FBgn0051092	FBgn0051092	FBgn0051092	LpR2	-0.606841	-0.606918	6.18949	0.00525377	0.0320933
FBgn0005322	FBgn0005322	FBgn0005322	nmd	0.648887	0.649438	3.52141	0.00527967	0.0322267
FBgn0031357	FBgn0031357	FBgn0031357	mRpL48	0.664882	0.665891	2.40947	0.005285	0.0322344
FBgn0001263	FBgn0001263	FBgn0001263	inaD	0.637072	0.637079	9.6019	0.00530909	0.0323271
FBgn0259716	FBgn0259716	FBgn0259716	Nepl6	0.664606	0.665265	3.4946	0.00531015	0.0323271
FBgn0243513	FBgn0243513	FBgn0243513	cnir	-0.74865	-0.750765	1.98606	0.00531366	0.0323271
FBgn0051122	FBgn0051122	FBgn0051122	CG31122	0.519244	0.519337	5.79136	0.0053165	0.0323271
FBgn0040571	FBgn0040571	FBgn0040571	CG17193	0.56239	0.562708	4.18549	0.00533869	0.0324371
FBgn0260964	FBgn0260964	FBgn0260964	Vmat	-0.557155	-0.557183	7.54653	0.00535375	0.0325037
FBgn0000442	FBgn0000442	FBgn0000442	Pkg21D	-0.758945	-0.760353	2.65978	0.00537103	0.0325837
FBgn0033558	FBgn0033558	FBgn0033558	CG12344	-0.589522	-0.589918	4.20734	0.0053764	0.0325913
FBgn0264090	FBgn0264090	FBgn0264090	CG43759	-0.576817	-0.576942	5.80236	0.00539575	0.0326837
FBgn0025634	FBgn0025634	FBgn0025634	CG13367	0.615593	0.615993	3.96409	0.00540616	0.0327217
FBgn0001149	FBgn0001149	FBgn0001149	GstD1	0.600397	0.600434	7.21305	0.0054165	0.0327593
FBgn0265191	FBgn0265191	FBgn0265191	Gyg	0.615252	0.615302	6.82582	0.00542354	0.0327769
FBgn0039915	FBgn0039915	FBgn0039915	Gat	-0.604782	-0.605035	4.49826	0.00543055	0.0327942
FBgn0024289	FBgn0024289	FBgn0024289	Sodh-1	-0.671009	-0.671232	5.13194	0.00551022	0.03325
FBgn0038814	FBgn0038814	FBgn0038814	CG15923	-0.983531	-0.987105	1.77573	0.00553143	0.0333526
FBgn0025456	FBgn0025456	FBgn0025456	CREG	-0.672001	-0.673011	3.64424	0.00557075	0.0335642
FBgn0262518	FBgn0262518	FBgn0262518	Rab8	0.543313	0.54339	6.0186	0.00558583	0.0336295
FBgn0260484	FBgn0260484	FBgn0260484	HIP	-0.637076	-0.637814	3.56362	0.00561397	0.0337733
FBgn0037958	FBgn0037958	FBgn0037958	CG6962	0.623622	0.624116	3.43597	0.00564985	0.0339633
FBgn0035942	FBgn0035942	FBgn0035942	ValRS-m	0.71889	0.719896	2.5865	0.0056573	0.0339823
FBgn0036376	FBgn0036376	FBgn0036376	Liprin-beta	0.589396	0.589563	5.12679	0.00570225	0.0342265
FBgn0086362	FBgn0086362	FBgn0086362	spn-F	0.708257	0.709098	2.83086	0.00571319	0.0342662
FBgn0026160	FBgn0026160	FBgn0026160	tna	0.49846	0.498477	8.05685	0.00572225	0.0342946
FBgn0036485	FBgn0036485	FBgn0036485	FucTA	0.585829	0.586144	3.94191	0.00575448	0.0344617
FBgn0032001	FBgn0032001	FBgn0032001	CG8360	0.606428	0.607013	3.29044	0.00576198	0.0344806
FBgn0085440	FBgn0085440	FBgn0085440	Lgr4	0.881036	0.881805	3.57712	0.00576798	0.0344904
FBgn0262570	FBgn0262570	FBgn0262570	CG43110	-0.894117	-0.894846	4.30409	0.00580549	0.0346886
FBgn0030088	FBgn0030088	FBgn0030088	Arfrp1	0.669177	0.670052	2.84935	0.00584376	0.0348909
FBgn0266711	FBgn0266711	FBgn0266711	EloC	0.667732	0.668068	4.34439	0.0058644	0.0349879
FBgn0029975	FBgn0029975	FBgn0029975	spidey	0.589736	0.589868	5.36905	0.00592091	0.0352984
FBgn0028693	FBgn0028693	FBgn0028693	Rpn12	0.713529	0.71424	3.10141	0.00597545	0.0355968
FBgn0032378	FBgn0032378	FBgn0032378	CycY	0.582487	0.582619	5.30919	0.00600188	0.0357171
FBgn0032613	FBgn0032613	FBgn0032613	Nepl9	-0.800619	-0.802381	2.74513	0.0060085	0.0357171
FBgn0004066	FBgn0004066	FBgn0004066	Prosalpha4	0.61685	0.617414	3.25708	0.00601417	0.0357171
FBgn0036857	FBgn0036857	FBgn0036857	Aldh7A1	-0.701006	-0.702483	2.30372	0.00601537	0.0357171
FBgn0264750	FBgn0264750	FBgn0264750	CG44008	-0.623138	-0.623309	5.02492	0.00601817	0.0357171
FBgn0033427	FBgn0033427	FBgn0033427	Smyd4-1	0.707725	0.708443	3.06098	0.00602675	0.0357413
FBgn0033101	FBgn0033101	FBgn0033101	CG9436	0.64432	0.644711	3.88538	0.00604193	0.0358045
FBgn0001098	FBgn0001098	FBgn0001098	Gdh	0.562799	0.56282	7.90804	0.00605064	0.0358238
FBgn0259243	FBgn0259243	FBgn0259243	Pka-R1	0.620186	0.620194	9.20324	0.00605421	0.0358238
FBgn0030158	FBgn0030158	FBgn0030158	CG9686	-0.576376	-0.576694	4.30315	0.00608464	0.0359742
FBgn0036254	FBgn0036254	FBgn0036254	CG5645	0.67248	0.67345	2.79076	0.00608872	0.0359742
FBgn0014133	FBgn0014133	FBgn0014133	bif	0.582328	0.582331	10.7955	0.00610995	0.0360457
FBgn0004870	FBgn0004870	FBgn0004870	bab1	-0.718865	-0.719445	3.58319	0.00611357	0.0360457
FBgn0259483	FBgn0259483	FBgn0259483	Mob4	0.629276	0.629458	5.15349	0.00611867	0.0360457
FBgn0030631	FBgn0030631	FBgn0030631	CG6227	0.541157	0.54129	5.24441	0.006119	0.0360457
FBgn0051145	FBgn0051145	FBgn0051145	CG31145	0.575762	0.575774	8.91832	0.00612764	0.0360698
FBgn0015925	FBgn0015925	FBgn0015925	csul	0.608787	0.609386	3.18803	0.0061406	0.0361193
FBgn0001325	FBgn0001325	FBgn0001325	Kr	-0.979503	-0.981572	2.73676	0.00616066	0.0362095
FBgn0028573	FBgn0028573	FBgn0028573	prc	-0.939393	-0.94224	2.00828	0.00616508	0.0362095
FBgn0036360	FBgn0036360	FBgn0036360	CG10713	-0.69341	-0.694201	2.81191	0.00617477	0.0362396
FBgn0027930	FBgn0027930	FBgn0027930	MP1	-0.695165	-0.695467	4.64607	0.00619444	0.0363282
FBgn0020304	FBgn0020304	FBgn0020304	drongo	0.519883	0.519893	8.7598	0.00622414	0.0364677
FBgn0045866	FBgn0045866	FBgn0045866	bai	-0.592506	-0.59298	3.44889	0.00622742	0.0364677
FBgn0028408	FBgn0028408	FBgn0028408	Drep2	0.578314	0.578433	5.29764	0.00628759	0.0367928
FBgn0031826	FBgn0031826	FBgn0031826	CG9550	-0.688138	-0.689719	2.21762	0.0063056	0.036871
FBgn0023076	FBgn0023076	FBgn0023076	Clk	0.914572	0.914591	8.52588	0.00631767	0.0369144
FBgn0031638	FBgn0031638	FBgn0031638	CG11927	-0.618881	-0.619187	4.39877	0.00634223	0.0370306
FBgn0053554	FBgn0053554	FBgn0053554	Nipped-A	-0.523253	-0.523272	8.04376	0.00637375	0.0371744
FBgn0039566	FBgn0039566	FBgn0039566	CG4849	0.604762	0.605192	3.66738	0.00637623	0.0371744
FBgn0053144	FBgn0053144	FBgn0053144	CG33144	0.52184	0.521844	10.3409	0.00642136	0.03741
FBgn0015025	FBgn0015025	FBgn0015025	CkIIalpha-i1	0.790438	0.792554	1.85368	0.00642755	0.0374185
FBgn0035064	FBgn0035064	FBgn0035064	TyrRS-m	0.748281	0.749588	2.36165	0.00643414	0.0374278
FBgn0010591	FBgn0010591	FBgn0010591	Sply	0.601467	0.601656	4.86392	0.00644083	0.0374278
FBgn0265767	FBgn0265767	FBgn0265767	zyd	-0.594111	-0.594393	4.37055	0.00644331	0.0374278
FBgn0003884	FBgn0003884	FBgn0003884	alphaTub84B	0.55696	0.556974	8.42886	0.00646464	0.0375242
FBgn0058006	FBgn0058006	FBgn0058006	CG40006	-0.563675	-0.563772	5.82588	0.00647081	0.0375326
FBgn0040778	FBgn0040778	FBgn0040778	CG17977	0.823179	0.825819	1.93132	0.00653798	0.0378733
FBgn0037902	FBgn0037902	FBgn0037902	CG5281	0.681329	0.681875	3.37503	0.00653911	0.0378733
FBgn0028360	FBgn0028360	FBgn0028360	Cdc7	-0.561326	-0.561489	5.40464	0.00660728	0.0382403
FBgn0032476	FBgn0032476	FBgn0032476	CG5439	0.639028	0.639541	3.49705	0.00663429	0.0383686
FBgn0035141	FBgn0035141	FBgn0035141	Cypl	0.6737	0.674726	2.64654	0.00665199	0.0384429
FBgn0266101	FBgn0266101	FBgn0266101	CG44838	-0.523974	-0.523983	9.45656	0.00671747	0.038793
FBgn0036742	FBgn0036742	FBgn0036742	CG7497	-0.729649	-0.730241	3.77293	0.0067563	0.0389888
FBgn0020647	FBgn0020647	FBgn0020647	KrT95D	-0.690131	-0.690148	8.67702	0.00678012	0.0390779
FBgn0010388	FBgn0010388	FBgn0010388	Dro	-1.08657	-1.08901	2.71669	0.00678158	0.0390779
FBgn0032052	FBgn0032052	FBgn0032052	PIG-U	0.77782	0.778756	2.71213	0.00684575	0.039419
FBgn0039081	FBgn0039081	FBgn0039081	Irk2	-0.615937	-0.616225	4.26422	0.00687915	0.0395825
FBgn0028689	FBgn0028689	FBgn0028689	Rpn6	0.538949	0.539081	5.14772	0.00689584	0.0396442
FBgn0030041	FBgn0030041	FBgn0030041	CG12116	0.733893	0.734296	4.22962	0.00689985	0.0396442
FBgn0264490	FBgn0264490	FBgn0264490	Eip93F	0.487184	0.487188	10.1135	0.00694348	0.0398659
FBgn0026566	FBgn0026566	FBgn0026566	CG1307	0.629616	0.630395	3.18571	0.00695304	0.039892
FBgn0267824	FBgn0267824	FBgn0267824	PRAS40	0.567138	0.56728	5.20671	0.00696601	0.0399375
FBgn0011638	FBgn0011638	FBgn0011638	La	0.624488	0.624737	4.4148	0.00699377	0.0400453
FBgn0002563	FBgn0002563	FBgn0002563	Lsp1beta	-0.650338	-0.650392	6.94944	0.00699493	0.0400453
FBgn0028695	FBgn0028695	FBgn0028695	Rpn1	0.51199	0.51208	5.47143	0.00701279	0.0401186
FBgn0261549	FBgn0261549	FBgn0261549	rdgA	-0.531996	-0.531997	13.0378	0.0070201	0.0401315
FBgn0038846	FBgn0038846	FBgn0038846	CG5697	-1.57428	-1.5756	4.26613	0.00702604	0.0401365
FBgn0028550	FBgn0028550	FBgn0028550	Atf3	-0.591033	-0.591063	7.73447	0.00705048	0.040246
FBgn0034611	FBgn0034611	FBgn0034611	MFS16	0.565301	0.56554	4.22943	0.00705537	0.040246
FBgn0010342	FBgn0010342	FBgn0010342	Map60	0.70601	0.706743	3.14634	0.00708044	0.0403549
FBgn0000064	FBgn0000064	FBgn0000064	Ald1	0.504748	0.504755	9.29206	0.00708464	0.0403549
FBgn0260995	FBgn0260995	FBgn0260995	dpr21	-0.575305	-0.575584	4.17144	0.00709724	0.0403977
FBgn0032217	FBgn0032217	FBgn0032217	CG4972	0.560358	0.560593	4.26192	0.00713362	0.0405757
FBgn0036570	FBgn0036570	FBgn0036570	IntS9	0.639581	0.640358	2.97883	0.0071446	0.040609
FBgn0036494	FBgn0036494	FBgn0036494	Toll-6	-0.531198	-0.531323	5.15105	0.00715908	0.0406621
FBgn0014930	FBgn0014930	FBgn0014930	CG2846	0.586209	0.586615	3.79909	0.00718771	0.0407773
FBgn0260941	FBgn0260941	FBgn0260941	app	-0.574027	-0.574031	10.8805	0.00718965	0.0407773
FBgn0037848	FBgn0037848	FBgn0037848	Tsp86D	0.578394	0.578813	3.71245	0.00720693	0.0408277
FBgn0032727	FBgn0032727	FBgn0032727	CG10623	-0.684935	-0.685771	3.25798	0.00721036	0.0408277
FBgn0036212	FBgn0036212	FBgn0036212	CG11597	0.603758	0.604395	2.92014	0.00721397	0.0408277
FBgn0039003	FBgn0039003	FBgn0039003	wfs1	0.645886	0.646186	4.02112	0.00723293	0.0409058
FBgn0051858	FBgn0051858	FBgn0051858	t-cup	-0.75428	-0.755709	2.31955	0.00724704	0.0409564
FBgn0035934	FBgn0035934	FBgn0035934	TrpA1	-0.82647	-0.827628	3.2953	0.00726025	0.0410018
FBgn0004583	FBgn0004583	FBgn0004583	ex	-0.533204	-0.533327	5.40251	0.00727974	0.0410714
FBgn0027608	FBgn0027608	FBgn0027608	CG2082	-0.555465	-0.555488	7.5732	0.00728294	0.0410714
FBgn0264330	FBgn0264330	FBgn0264330	CG43789	0.601174	0.601534	4.25989	0.00729812	0.0411278
FBgn0264357	FBgn0264357	FBgn0264357	SNF4Agamma	0.580845	0.580847	11.0821	0.00731159	0.0411744
FBgn0025815	FBgn0025815	FBgn0025815	Mcm6	0.693557	0.695067	2.24751	0.00733457	0.0412745
FBgn0038084	FBgn0038084	FBgn0038084	beat-Vc	-0.735539	-0.736915	2.37038	0.00734703	0.0413153
FBgn0035539	FBgn0035539	FBgn0035539	slow	-0.67511	-0.676517	2.58358	0.00737307	0.0414324
FBgn0028743	FBgn0028743	FBgn0028743	Dhit	0.509855	0.50989	7.06022	0.00740568	0.0415581
FBgn0267698	FBgn0267698	FBgn0267698	Pak	-0.580038	-0.58005	8.97226	0.00740593	0.0415581
FBgn0004050	FBgn0004050	FBgn0004050	z	0.595371	0.595548	4.94845	0.00749869	0.0420076
FBgn0031256	FBgn0031256	FBgn0031256	shv	0.655788	0.656465	3.26865	0.00749961	0.0420076
FBgn0035402	FBgn0035402	FBgn0035402	Usp5	0.540236	0.540465	4.27098	0.00750193	0.0420076
FBgn0039332	FBgn0039332	FBgn0039332	alrm	-0.59835	-0.598642	4.32789	0.00751798	0.0420678
FBgn0031309	FBgn0031309	FBgn0031309	Tfb4	0.815025	0.817832	1.51717	0.00753419	0.0421288
FBgn0026403	FBgn0026403	FBgn0026403	Ndg	-0.877927	-0.879048	2.91299	0.00755252	0.0422015
FBgn0031573	FBgn0031573	FBgn0031573	CG3407	0.66241	0.662854	3.64052	0.00763754	0.0426328
FBgn0037690	FBgn0037690	FBgn0037690	Task7	-0.715896	-0.717921	1.85281	0.0076429	0.0426328
FBgn0039109	FBgn0039109	FBgn0039109	CG10365	-0.569412	-0.569707	4.36966	0.00764583	0.0426328
FBgn0038827	FBgn0038827	FBgn0038827	Fancd2	0.708474	0.70922	3.62122	0.00766276	0.0426971
FBgn0031437	FBgn0031437	FBgn0031437	Arpc5	0.573474	0.573885	3.62235	0.00769381	0.0428401
FBgn0022213	FBgn0022213	FBgn0022213	Cse1	0.596956	0.597243	4.11786	0.00772254	0.0429562
FBgn0020224	FBgn0020224	FBgn0020224	Cbl	0.62541	0.625431	7.87772	0.00772551	0.0429562
FBgn0263112	FBgn0263112	FBgn0263112	Mitf	0.49622	0.496279	6.33401	0.00775072	0.0430595
FBgn0036262	FBgn0036262	FBgn0036262	CG6910	-0.661707	-0.661805	5.96369	0.00775495	0.0430595
FBgn0033654	FBgn0033654	FBgn0033654	Sobp	-0.659361	-0.659929	3.99713	0.00777263	0.0431275
FBgn0036090	FBgn0036090	FBgn0036090	CG8009	0.670496	0.671798	2.34803	0.00784071	0.0434748
FBgn0004456	FBgn0004456	FBgn0004456	mew	0.500151	0.500223	5.85915	0.0078768	0.0436391
FBgn0004390	FBgn0004390	FBgn0004390	RasGAP1	-0.508131	-0.508157	7.53613	0.00788135	0.0436391
FBgn0033457	FBgn0033457	FBgn0033457	Ntmt	0.793068	0.794728	2.29203	0.00789115	0.0436629
FBgn0039483	FBgn0039483	FBgn0039483	CG14259	-0.630107	-0.630948	3.02574	0.0079525	0.0439705
FBgn0015282	FBgn0015282	FBgn0015282	Rpt2	0.578509	0.578674	4.88686	0.00795784	0.0439705
FBgn0036290	FBgn0036290	FBgn0036290	CG10638	0.564689	0.56478	5.92085	0.00804502	0.0444213
FBgn0037993	FBgn0037993	FBgn0037993	dpr15	-0.641302	-0.641652	4.24432	0.00805988	0.0444723
FBgn0041186	FBgn0041186	FBgn0041186	Slbp	0.769528	0.770582	2.93631	0.00806816	0.0444871
FBgn0263047	FBgn0263047	FBgn0263047	CG43342	0.677798	0.678991	2.39259	0.00807379	0.0444872
FBgn0286831	FBgn0286831	FBgn0286831	sov	0.477808	0.47782	8.49358	0.00808346	0.0445095
FBgn0262976	FBgn0262976	FBgn0262976	lawc	0.527863	0.528005	4.96614	0.00812497	0.044681
FBgn0264494	FBgn0264494	FBgn0264494	CG17646	0.510568	0.510616	6.77589	0.00812587	0.044681
FBgn0040754	FBgn0040754	FBgn0040754	CG17059	-0.692895	-0.694949	2.23792	0.00814424	0.044751
FBgn0000406	FBgn0000406	FBgn0000406	Cyt-b5-r	-0.485289	-0.485329	6.87542	0.00815642	0.0447869
FBgn0038803	FBgn0038803	FBgn0038803	CG5191	0.499437	0.499487	6.5509	0.00817346	0.0448494
FBgn0260462	FBgn0260462	FBgn0260462	CG12163	0.540392	0.540417	7.5328	0.00820606	0.0449971
FBgn0030956	FBgn0030956	FBgn0030956	CG18259	-0.624893	-0.625838	3.02401	0.0082388	0.0451454
FBgn0030757	FBgn0030757	FBgn0030757	CG9902	0.573598	0.573752	5.00905	0.00825223	0.0451878
FBgn0036239	FBgn0036239	FBgn0036239	Pop2	0.547893	0.547953	6.43576	0.00827165	0.0452629
FBgn0038418	FBgn0038418	FBgn0038418	pad	0.690642	0.690976	4.01573	0.00829526	0.0453608
FBgn0038951	FBgn0038951	FBgn0038951	CG5380	0.70269	0.704077	2.55725	0.00834647	0.045565
FBgn0036106	FBgn0036106	FBgn0036106	CG6409	0.570245	0.570283	7.33724	0.00834719	0.045565
FBgn0031717	FBgn0031717	FBgn0031717	Oscillin	0.596665	0.597138	3.33865	0.00834984	0.045565
FBgn0031631	FBgn0031631	FBgn0031631	CG3225	0.703331	0.703776	3.69346	0.00840112	0.0458095
FBgn0025620	FBgn0025620	FBgn0025620	CG13360	-0.72522	-0.725826	3.50841	0.00840621	0.0458095
FBgn0037081	FBgn0037081	FBgn0037081	barc	0.49226	0.492344	5.79322	0.00842567	0.045884
FBgn0035020	FBgn0035020	FBgn0035020	CG13585	0.513399	0.513533	5.10773	0.00844836	0.045976
FBgn0036141	FBgn0036141	FBgn0036141	wls	0.556413	0.556661	4.23632	0.00846468	0.0460059
FBgn0030217	FBgn0030217	FBgn0030217	CG2124	0.683802	0.684637	2.88959	0.00846545	0.0460059
FBgn0035398	FBgn0035398	FBgn0035398	Cht7	-0.684396	-0.685605	2.79806	0.00847475	0.0460248
FBgn0040528	FBgn0040528	FBgn0040528	CG15864	-0.794054	-0.795394	2.63587	0.00851045	0.0461871
FBgn0036726	FBgn0036726	FBgn0036726	QIL1	-0.626517	-0.626977	3.91423	0.00854029	0.0463174
FBgn0039904	FBgn0039904	FBgn0039904	Hcf	-0.447738	-0.447754	8.10602	0.00857108	0.0464526
FBgn0034753	FBgn0034753	FBgn0034753	CG2852	0.530264	0.530401	5.19239	0.0085775	0.0464556
FBgn0039636	FBgn0039636	FBgn0039636	Atg14	0.701783	0.702085	4.47683	0.00858367	0.0464573
FBgn0051098	FBgn0051098	FBgn0051098	CG31098	-0.645323	-0.645596	5.10721	0.0086015	0.046522
FBgn0020503	FBgn0020503	FBgn0020503	CLIP-190	0.49028	0.490292	8.48246	0.00862477	0.0466161
FBgn0024732	FBgn0024732	FBgn0024732	Drep1	-0.574475	-0.575022	3.45765	0.00864984	0.0467197
FBgn0083970	FBgn0083970	FBgn0083970	CG34134	0.651002	0.651789	3.07432	0.00866187	0.0467529
FBgn0262867	FBgn0262867	FBgn0262867	Ptr	-0.607741	-0.608092	4.04795	0.00870086	0.0469252
FBgn0039402	FBgn0039402	FBgn0039402	Vps2	0.59385	0.594117	4.29495	0.00870563	0.0469252
FBgn0011260	FBgn0011260	FBgn0011260	Sema2a	-0.673387	-0.673675	4.30674	0.00873545	0.0470309
FBgn0039031	FBgn0039031	FBgn0039031	Gbp3	-0.645301	-0.646189	3.17421	0.0087371	0.0470309
FBgn0033889	FBgn0033889	FBgn0033889	CG6701	-0.574618	-0.574762	5.37816	0.00874414	0.0470368
FBgn0011592	FBgn0011592	FBgn0011592	fra	0.483208	0.483268	6.21559	0.0087538	0.0470569
FBgn0014906	FBgn0014906	FBgn0014906	Hydr2	0.568149	0.568259	5.59567	0.00876545	0.0470876
FBgn0000439	FBgn0000439	FBgn0000439	Dfd	-0.597714	-0.597957	4.70106	0.00880066	0.0472433
FBgn0025700	FBgn0025700	FBgn0025700	CG5885	0.723463	0.72432	2.85142	0.00880635	0.0472433
FBgn0031051	FBgn0031051	FBgn0031051	Ranbp21	0.548539	0.548616	6.05264	0.00882635	0.0473185
FBgn0038876	FBgn0038876	FBgn0038876	Idi	0.6208	0.621395	3.32781	0.00883544	0.0473353
FBgn0052792	FBgn0052792	FBgn0052792	ppk8	-0.639286	-0.639924	3.46351	0.00886484	0.0474447
FBgn0039140	FBgn0039140	FBgn0039140	Miro	0.478499	0.478553	6.39392	0.00886784	0.0474447
FBgn0052772	FBgn0052772	FBgn0052772	CG32772	0.545037	0.545146	5.48953	0.008877	0.0474617
FBgn0033199	FBgn0033199	FBgn0033199	CG17985	0.512432	0.512666	4.46842	0.00889645	0.0475139
FBgn0034647	FBgn0034647	FBgn0034647	pirk	1.49677	1.49745	5.21349	0.00889874	0.0475139
FBgn0028863	FBgn0028863	FBgn0028863	CG4587	-0.511006	-0.511031	7.75986	0.00891601	0.0475741
FBgn0032465	FBgn0032465	FBgn0032465	Yip1d1	0.547126	0.547443	3.95036	0.00893149	0.0476246
FBgn0000810	FBgn0000810	FBgn0000810	fs(1)K10	0.55219	0.552384	4.77556	0.00894922	0.0476871
FBgn0040973	FBgn0040973	FBgn0040973	CG16824	-0.673424	-0.673668	4.75281	0.00900922	0.0479745
FBgn0005695	FBgn0005695	FBgn0005695	gcl	-0.587393	-0.587701	4.27191	0.00902188	0.0480097
FBgn0026061	FBgn0026061	FBgn0026061	Mipp1	-0.572965	-0.573214	4.46364	0.00904277	0.0480831
FBgn0032600	FBgn0032600	FBgn0032600	BuGZ	-0.495525	-0.495533	9.4082	0.00904904	0.0480831
FBgn0266377	FBgn0266377	FBgn0266377	Pde8	-0.702521	-0.702543	8.78191	0.00905385	0.0480831
FBgn0038262	FBgn0038262	FBgn0038262	CG14857	-1.21913	-1.22012	4.2045	0.00908482	0.0482152
FBgn0039861	FBgn0039861	FBgn0039861	pasha	-0.515307	-0.515391	5.75881	0.00914009	0.0484761
FBgn0032213	FBgn0032213	FBgn0032213	CG5390	-0.520179	-0.520356	4.81981	0.00920134	0.0487662
FBgn0032230	FBgn0032230	FBgn0032230	lft	-0.619287	-0.620078	3.38117	0.00920709	0.0487662
FBgn0035622	FBgn0035622	FBgn0035622	TM9SF3	0.592966	0.593213	4.35236	0.00922364	0.0488212
FBgn0051852	FBgn0051852	FBgn0051852	Tap42	0.666191	0.666912	2.94904	0.00923888	0.0488693
FBgn0015295	FBgn0015295	FBgn0015295	Shark	-0.640007	-0.640287	4.69453	0.00925448	0.0488944
FBgn0003255	FBgn0003255	FBgn0003255	rk	-0.622839	-0.623798	2.72601	0.00925597	0.0488944
FBgn0032997	FBgn0032997	FBgn0032997	CG17486	-0.563534	-0.563858	4.0528	0.00926911	0.0489313
FBgn0086909	FBgn0086909	FBgn0086909	CG31751	0.541891	0.542033	5.22011	0.00928098	0.0489613
FBgn0038739	FBgn0038739	FBgn0038739	CG4686	0.606158	0.606639	3.62442	0.00931002	0.0490819
FBgn0263197	FBgn0263197	FBgn0263197	Patronin	0.470616	0.47062	9.78205	0.00933174	0.0491637
FBgn0039277	FBgn0039277	FBgn0039277	Nepl16	-0.493649	-0.493735	5.58698	0.00935847	0.0492718
FBgn0025639	FBgn0025639	FBgn0025639	Hmt4-20	0.46554	0.465555	8.31311	0.00937091	0.049279
FBgn0263929	FBgn0263929	FBgn0263929	jvl	0.485115	0.485118	10.3052	0.00937226	0.049279
FBgn0025716	FBgn0025716	FBgn0025716	Bap55	0.622373	0.623212	2.77651	0.00938919	0.0493353

## Sheet: D15
	genes	FbgnID	symbol	logFC	unshrunk.logFC	logCPM	PValue	FDR
FBgn0013323	FBgn0013323	FBgn0013323	Ptth	1.90076	1.90468	2.50744	8.78682e-16	6.96707e-12
FBgn0050295	FBgn0050295	FBgn0050295	Ipk1	1.44277	1.44286	7.64452	2.40403e-13	9.53076e-10
FBgn0039925	FBgn0039925	FBgn0039925	Kif3C	1.66891	1.66945	5.56784	2.02297e-12	5.3467e-09
FBgn0033863	FBgn0033863	FBgn0033863	CG13337	1.31763	1.31809	5.31315	2.4627e-11	4.88169e-08
FBgn0053003	FBgn0053003	FBgn0053003	CG33003	2.7766	2.77929	5.26425	2.00792e-09	3.18416e-06
FBgn0054002	FBgn0054002	FBgn0054002	CG34002	1.56146	1.56511	2.4767	2.45797e-09	3.2482e-06
FBgn0266000	FBgn0266000	FBgn0266000	CG44774	1.12964	1.12974	6.96531	8.03645e-09	9.103e-06
FBgn0023550	FBgn0023550	FBgn0023550	FarO	-2.07739	-2.07783	5.78971	1.17827e-08	1.16781e-05
FBgn0040606	FBgn0040606	FBgn0040606	CG6503	-1.67311	-1.67464	3.24352	4.37196e-08	3.8517e-05
FBgn0002542	FBgn0002542	FBgn0002542	lds	1.12291	1.12393	3.74884	7.69782e-08	6.1036e-05
FBgn0005626	FBgn0005626	FBgn0005626	ple	-1.06682	-1.06712	5.40544	1.043e-07	7.51816e-05
FBgn0038827	FBgn0038827	FBgn0038827	Fancd2	1.3434	1.34457	3.62122	1.44573e-07	9.14538e-05
FBgn0037304	FBgn0037304	FBgn0037304	CG1113	1.1141	1.11519	3.55312	1.49943e-07	9.14538e-05
FBgn0052580	FBgn0052580	FBgn0052580	Muc14A	1.22454	1.22493	4.89551	2.08789e-07	0.000118249
FBgn0032850	FBgn0032850	FBgn0032850	Kua	1.53128	1.53446	2.57786	2.97765e-07	0.000157398
FBgn0002526	FBgn0002526	FBgn0002526	LanA	-0.94165	-0.941838	5.56489	4.1235e-07	0.000194985
FBgn0054045	FBgn0054045	FBgn0054045	CG34045	1.54595	1.55008	2.48242	4.28169e-07	0.000194985
FBgn0014135	FBgn0014135	FBgn0014135	bnl	1.28778	1.28787	7.91233	4.42645e-07	0.000194985
FBgn0040849	FBgn0040849	FBgn0040849	Ir41a	1.29509	1.29611	3.65937	4.71797e-07	0.000196888
FBgn0004516	FBgn0004516	FBgn0004516	Gad1	-0.946732	-0.946852	6.22958	8.25352e-07	0.000327211
FBgn0285926	FBgn0285926	FBgn0285926	Imp	0.785731	0.785778	7.71422	1.0695e-06	0.000403811
FBgn0021738	FBgn0021738	FBgn0021738	Crg-1	1.07455	1.07469	6.49737	1.23359e-06	0.000443361
FBgn0026439	FBgn0026439	FBgn0026439	Eaat1	-0.988286	-0.988344	8.16254	1.28608e-06	0.000443361
FBgn0038820	FBgn0038820	FBgn0038820	CG4000	-1.37476	-1.37649	3.1525	1.67546e-06	0.000553531
FBgn0033936	FBgn0033936	FBgn0033936	Achl	-1.42778	-1.4279	8.81552	2.2224e-06	0.000704856
FBgn0051897	FBgn0051897	FBgn0051897	CG31897	1.07121	1.07232	3.28705	3.3411e-06	0.00101891
FBgn0037000	FBgn0037000	FBgn0037000	ZnT77C	-1.44718	-1.45169	1.77738	3.6691e-06	0.00105475
FBgn0250907	FBgn0250907	FBgn0250907	Cht10	1.21125	1.21211	3.65435	3.73048e-06	0.00105475
FBgn0037141	FBgn0037141	FBgn0037141	DNApol-eta	0.989922	0.990442	4.35895	3.8577e-06	0.00105475
FBgn0030721	FBgn0030721	FBgn0030721	CG12698	1.12945	1.13126	2.65485	4.43538e-06	0.00114852
FBgn0033367	FBgn0033367	FBgn0033367	PPO2	-1.00595	-1.0062	5.27743	4.59228e-06	0.00114852
FBgn0035695	FBgn0035695	FBgn0035695	CG10226	-0.870033	-0.870348	4.75756	4.6352e-06	0.00114852
FBgn0285912	FBgn0285912	FBgn0285912	mah	1.28115	1.28172	5.16018	4.83551e-06	0.00116184
FBgn0037076	FBgn0037076	FBgn0037076	ebd2	0.913134	0.913711	3.88873	5.08818e-06	0.00118659
FBgn0045842	FBgn0045842	FBgn0045842	yuri	0.893208	0.893486	4.95423	5.49257e-06	0.0012443
FBgn0032637	FBgn0032637	FBgn0032637	CG5050	1.31558	1.31695	3.42956	5.81648e-06	0.00128108
FBgn0003479	FBgn0003479	FBgn0003479	spn-A	1.26826	1.27048	2.74218	6.53081e-06	0.00139953
FBgn0027073	FBgn0027073	FBgn0027073	Ugt49B1	-1.0916	-1.09315	2.81732	6.7489e-06	0.00140821
FBgn0001168	FBgn0001168	FBgn0001168	h	0.960892	0.96102	6.22302	8.31009e-06	0.00168951
FBgn0034558	FBgn0034558	FBgn0034558	Cib2	1.04237	1.04282	4.61209	8.53813e-06	0.00169247
FBgn0033475	FBgn0033475	FBgn0033475	CG12129	1.37207	1.37504	2.4953	9.08958e-06	0.00175784
FBgn0039804	FBgn0039804	FBgn0039804	CG15544	-1.16486	-1.16501	6.651	1.06117e-05	0.00200334
FBgn0001226	FBgn0001226	FBgn0001226	Hsp27	3.93446	3.93563	6.18202	1.0962e-05	0.00202134
FBgn0029167	FBgn0029167	FBgn0029167	Hml	-0.820821	-0.820923	6.13016	1.15722e-05	0.00208536
FBgn0040813	FBgn0040813	FBgn0040813	Nplp2	-1.31183	-1.31198	6.36038	1.24895e-05	0.0021503
FBgn0033864	FBgn0033864	FBgn0033864	CG18368	0.960353	0.960781	4.84341	1.2869e-05	0.0021503
FBgn0025620	FBgn0025620	FBgn0025620	CG13360	-1.19643	-1.19762	3.50841	1.29959e-05	0.0021503
FBgn0011828	FBgn0011828	FBgn0011828	Pxn	-0.757518	-0.757682	5.37119	1.30174e-05	0.0021503
FBgn0020372	FBgn0020372	FBgn0020372	TM4SF	-1.05619	-1.05661	4.57834	1.41618e-05	0.00229161
FBgn0051249	FBgn0051249	FBgn0051249	CG31249	1.05401	1.05536	3.1719	1.51436e-05	0.00240148
FBgn0020908	FBgn0020908	FBgn0020908	Scp1	1.38329	1.38541	3.02652	1.8023e-05	0.00280204
FBgn0021800	FBgn0021800	FBgn0021800	Reph	0.635431	0.63546	7.5041	2.24317e-05	0.00338948
FBgn0035817	FBgn0035817	FBgn0035817	CG7409	-0.964131	-0.964872	3.74587	2.26564e-05	0.00338948
FBgn0032530	FBgn0032530	FBgn0032530	CG9263	-1.09488	-1.09663	2.82056	2.32465e-05	0.00341337
FBgn0283437	FBgn0283437	FBgn0283437	PPO1	-1.11374	-1.11462	3.81491	2.42576e-05	0.00349707
FBgn0033354	FBgn0033354	FBgn0033354	FANCI	0.919281	0.920311	3.23749	2.5128e-05	0.00355786
FBgn0032109	FBgn0032109	FBgn0032109	CG17005	-2.02611	-2.02614	8.98909	2.60143e-05	0.00361873
FBgn0034487	FBgn0034487	FBgn0034487	Efhc1.2	1.17283	1.17477	3.28821	2.66354e-05	0.00364125
FBgn0011581	FBgn0011581	FBgn0011581	Ms	-1.07554	-1.07674	3.13986	2.7917e-05	0.00375176
FBgn0032399	FBgn0032399	FBgn0032399	CG6785	1.60038	1.60226	3.03731	2.84839e-05	0.00376415
FBgn0032614	FBgn0032614	FBgn0032614	CG13284	0.761689	0.761724	8.18507	3.0713e-05	0.00377193
FBgn0011206	FBgn0011206	FBgn0011206	bol	-0.739255	-0.739268	8.96536	3.07332e-05	0.00377193
FBgn0000299	FBgn0000299	FBgn0000299	Col4a1	-0.801215	-0.801266	7.25541	3.08811e-05	0.00377193
FBgn0010114	FBgn0010114	FBgn0010114	hig	-0.930292	-0.930323	8.89379	3.09163e-05	0.00377193
FBgn0037531	FBgn0037531	FBgn0037531	CG10445	1.03374	1.03576	2.37211	3.09213e-05	0.00377193
FBgn0001222	FBgn0001222	FBgn0001222	Hsf	1.39296	1.39304	7.20489	3.22809e-05	0.00387811
FBgn0085260	FBgn0085260	FBgn0085260	CG34231	1.09357	1.0951	2.71559	3.48921e-05	0.00412924
FBgn0033911	FBgn0033911	FBgn0033911	VGAT	-0.851732	-0.852243	4.04811	3.70009e-05	0.00431441
FBgn0039250	FBgn0039250	FBgn0039250	Mink	1.14954	1.15146	2.75697	4.1292e-05	0.00474498
FBgn0033087	FBgn0033087	FBgn0033087	Hsepi	-0.937612	-0.9378	5.76075	4.56551e-05	0.00517142
FBgn0052512	FBgn0052512	FBgn0052512	CG32512	0.857414	0.857806	4.60188	4.87091e-05	0.00543964
FBgn0270926	FBgn0270926	FBgn0270926	AsnS	2.09825	2.09884	5.48566	5.01045e-05	0.0054881
FBgn0039203	FBgn0039203	FBgn0039203	CG13618	1.22042	1.22264	2.58023	5.05274e-05	0.0054881
FBgn0032705	FBgn0032705	FBgn0032705	Grip71	0.967399	0.968748	3.00214	5.35533e-05	0.0056673
FBgn0037627	FBgn0037627	FBgn0037627	CG13318	-1.2068	-1.20686	7.78907	5.36067e-05	0.0056673
FBgn0003295	FBgn0003295	FBgn0003295	ru	-1.22725	-1.2277	4.82611	5.54816e-05	0.00572598
FBgn0260746	FBgn0260746	FBgn0260746	Ect3	-0.977903	-0.978963	3.23796	5.61538e-05	0.00572598
FBgn0015351	FBgn0015351	FBgn0015351	CG14906	1.01722	1.01832	3.98685	5.64374e-05	0.00572598
FBgn0046114	FBgn0046114	FBgn0046114	Gclm	0.821323	0.821433	6.17727	5.72094e-05	0.00572598
FBgn0259716	FBgn0259716	FBgn0259716	Nepl6	0.925357	0.926203	3.4946	5.77725e-05	0.00572598
FBgn0038873	FBgn0038873	FBgn0038873	CG5892	-1.50966	-1.51045	4.22747	5.90358e-05	0.00577895
FBgn0037646	FBgn0037646	FBgn0037646	CAHbeta	0.957008	0.957709	3.79334	6.21059e-05	0.00600534
FBgn0085195	FBgn0085195	FBgn0085195	CG34166	-0.842565	-0.843017	4.11901	6.43925e-05	0.00615143
FBgn0052228	FBgn0052228	FBgn0052228	CG32228	1.76947	1.77087	3.58054	6.78805e-05	0.00640743
FBgn0260964	FBgn0260964	FBgn0260964	Vmat	-0.749792	-0.749834	7.54653	7.23993e-05	0.00663078
FBgn0016075	FBgn0016075	FBgn0016075	vkg	-0.710884	-0.710949	6.80213	7.26261e-05	0.00663078
FBgn0037976	FBgn0037976	FBgn0037976	Tk	-0.886145	-0.88702	3.31488	7.27554e-05	0.00663078
FBgn0025456	FBgn0025456	FBgn0025456	CREG	0.874723	0.875495	3.64424	7.50925e-05	0.00670709
FBgn0038839	FBgn0038839	FBgn0038839	Ktl	-0.941672	-0.942285	3.84077	7.52846e-05	0.00670709
FBgn0039298	FBgn0039298	FBgn0039298	to	-0.98957	-0.990773	3.07477	7.93629e-05	0.00699187
FBgn0002534	FBgn0002534	FBgn0002534	Lcp3	0.934638	0.936447	2.52728	8.53811e-05	0.00736269
FBgn0046763	FBgn0046763	FBgn0046763	CG17278	0.990616	0.991152	4.18893	8.54291e-05	0.00736269
FBgn0263353	FBgn0263353	FBgn0263353	CG11000	-0.793042	-0.793081	7.60251	8.64765e-05	0.00737282
FBgn0032336	FBgn0032336	FBgn0032336	AstC	-1.06178	-1.06381	2.27335	9.14855e-05	0.0077169
FBgn0027070	FBgn0027070	FBgn0027070	Ugt36E1	0.926769	0.927444	3.94349	9.37807e-05	0.00776385
FBgn0036927	FBgn0036927	FBgn0036927	Gabat	-0.797195	-0.797436	4.99891	9.42876e-05	0.00776385
FBgn0027106	FBgn0027106	FBgn0027106	Inx7	-0.951002	-0.951348	4.44488	9.49796e-05	0.00776385
FBgn0261016	FBgn0261016	FBgn0261016	clos	0.965697	0.967881	2.54225	0.000107701	0.00871391
FBgn0052829	FBgn0052829	FBgn0052829	CG32829	0.999968	1.00081	3.30402	0.000125756	0.00997052
FBgn0025712	FBgn0025712	FBgn0025712	CG13920	-1.09061	-1.09372	1.83402	0.000126371	0.00997052
FBgn0028936	FBgn0028936	FBgn0028936	NimB5	-0.976178	-0.978526	2.22175	0.000127005	0.00997052
FBgn0000153	FBgn0000153	FBgn0000153	b	-0.807227	-0.807605	4.42861	0.000128938	0.010023
FBgn0027584	FBgn0027584	FBgn0027584	CG4757	1.0998	1.10152	2.80112	0.00015209	0.011708
FBgn0001225	FBgn0001225	FBgn0001225	Hsp26	2.90085	2.90109	8.03616	0.000156275	0.0118619
FBgn0031240	FBgn0031240	FBgn0031240	CG3345	1.08997	1.09224	2.75482	0.000157081	0.0118619
FBgn0002939	FBgn0002939	FBgn0002939	ninaD	2.03856	2.03876	6.67944	0.000166287	0.0124386
FBgn0033543	FBgn0033543	FBgn0033543	CG12338	-0.838872	-0.838981	6.48933	0.000171797	0.0127306
FBgn0027553	FBgn0027553	FBgn0027553	NELF-B	-0.900328	-0.90194	2.63874	0.000174269	0.0127901
FBgn0286778	FBgn0286778	FBgn0286778	CG46385	0.846912	0.846915	10.7619	0.000175826	0.0127901
FBgn0032420	FBgn0032420	FBgn0032420	CG6583	0.87163	0.872941	2.91431	0.00018174	0.013031
FBgn0035181	FBgn0035181	FBgn0035181	CG9205	-0.78129	-0.781427	5.77629	0.000182424	0.013031
FBgn0016675	FBgn0016675	FBgn0016675	Lectin-galC1	1.01429	1.01778	1.93389	0.000197826	0.0140051
FBgn0003390	FBgn0003390	FBgn0003390	shf	0.855208	0.856087	3.35449	0.000199617	0.0140067
FBgn0033174	FBgn0033174	FBgn0033174	CG11125	0.957311	0.959053	2.93299	0.000207074	0.0144026
FBgn0004580	FBgn0004580	FBgn0004580	Cbp53E	-0.710087	-0.710324	4.73176	0.000212995	0.0146855
FBgn0004832	FBgn0004832	FBgn0004832	Xpac	0.990399	0.992012	2.8962	0.000232036	0.0158605
FBgn0001224	FBgn0001224	FBgn0001224	Hsp23	3.42905	3.43045	5.9542	0.000237413	0.0160144
FBgn0037360	FBgn0037360	FBgn0037360	CG2182	0.618847	0.618933	6.19459	0.000238327	0.0160144
FBgn0002354	FBgn0002354	FBgn0002354	l(3)87Df	-1.08297	-1.0862	1.81601	0.000254198	0.0169373
FBgn0015229	FBgn0015229	FBgn0015229	glec	0.68695	0.687107	5.58422	0.000279993	0.0184131
FBgn0034935	FBgn0034935	FBgn0034935	Orcokinin	0.935072	0.935342	5.59762	0.000280992	0.0184131
FBgn0034647	FBgn0034647	FBgn0034647	pirk	2.10374	2.10454	5.21349	0.00028522	0.018537
FBgn0053267	FBgn0053267	FBgn0053267	CG33267	0.928624	0.929488	3.93659	0.000291091	0.0187647
FBgn0260943	FBgn0260943	FBgn0260943	Rbp6	-0.652954	-0.652967	8.88178	0.000313996	0.020078
FBgn0000079	FBgn0000079	FBgn0000079	Amy-p	0.908785	0.90926	4.51511	0.000318918	0.0201025
FBgn0026409	FBgn0026409	FBgn0026409	Mpcp2	-0.675093	-0.67513	7.76851	0.000319449	0.0201025
FBgn0036181	FBgn0036181	FBgn0036181	Muc68Ca	0.922649	0.923846	2.91831	0.000322312	0.0201229
FBgn0038366	FBgn0038366	FBgn0038366	CG4576	1.13197	1.13317	3.04399	0.000328046	0.0203209
FBgn0025702	FBgn0025702	FBgn0025702	Srpk79D	0.611452	0.61149	7.41529	0.000332593	0.0204429
FBgn0263755	FBgn0263755	FBgn0263755	Su(var)3-9	0.84187	0.842367	4.00817	0.000338536	0.0206481
FBgn0263046	FBgn0263046	FBgn0263046	CG43341	1.14475	1.14644	3.52866	0.000358013	0.0216407
FBgn0038897	FBgn0038897	FBgn0038897	CG5849	1.0871	1.08819	3.41771	0.000360269	0.0216407
FBgn0263911	FBgn0263911	FBgn0263911	COX8	-1.0284	-1.03046	2.39673	0.000365233	0.021774
FBgn0037292	FBgn0037292	FBgn0037292	plh	-0.928321	-0.929664	3.16306	0.000372974	0.0220695
FBgn0038058	FBgn0038058	FBgn0038058	CG5608	1.49146	1.49176	5.45035	0.000376144	0.0220922
FBgn0032483	FBgn0032483	FBgn0032483	CG15482	1.0364	1.04018	1.55406	0.000385072	0.0224503
FBgn0035495	FBgn0035495	FBgn0035495	CG14989	-0.646979	-0.647053	6.33361	0.000390822	0.0226192
FBgn0027889	FBgn0027889	FBgn0027889	ball	1.02685	1.0278	3.4384	0.000408465	0.023469
FBgn0039635	FBgn0039635	FBgn0039635	Pdhb	-0.598198	-0.598304	6.06758	0.000418527	0.0238741
FBgn0001092	FBgn0001092	FBgn0001092	Gapdh2	-0.705095	-0.705173	6.66234	0.000430074	0.0242121
FBgn0260860	FBgn0260860	FBgn0260860	Bet5	0.815157	0.816426	2.84039	0.000431834	0.0242121
FBgn0011660	FBgn0011660	FBgn0011660	Pms2	0.728181	0.72858	4.20575	0.000433613	0.0242121
FBgn0034377	FBgn0034377	FBgn0034377	CG15071	0.850013	0.850798	3.3246	0.000439397	0.0243635
FBgn0053092	FBgn0053092	FBgn0053092	P5CDh2	1.04794	1.05104	1.83504	0.00044734	0.0245446
FBgn0037873	FBgn0037873	FBgn0037873	SdhC	-0.731559	-0.73209	4.04396	0.00045136	0.0245446
FBgn0038921	FBgn0038921	FBgn0038921	CG6332	1.19914	1.20017	3.68994	0.000451949	0.0245446
FBgn0262970	FBgn0262970	FBgn0262970	CR43281	0.977868	0.978831	3.44928	0.000460178	0.0248215
FBgn0026562	FBgn0026562	FBgn0026562	SPARC	-0.894703	-0.895032	4.95559	0.000480055	0.0257186
FBgn0001230	FBgn0001230	FBgn0001230	Hsp68	2.88883	2.88898	8.35221	0.000489565	0.0260521
FBgn0000063	FBgn0000063	FBgn0000063	Mps1	1.26517	1.26787	2.381	0.000500611	0.0264623
FBgn0034085	FBgn0034085	FBgn0034085	Ptp52F	0.8575	0.858782	2.51966	0.000512379	0.0268458
FBgn0032805	FBgn0032805	FBgn0032805	CG10337	1.0211	1.02304	3.70987	0.000514638	0.0268458
FBgn0284408	FBgn0284408	FBgn0284408	trol	-0.574399	-0.574408	9.05932	0.00052267	0.0269592
FBgn0005355	FBgn0005355	FBgn0005355	Su(fu)	-0.747498	-0.747739	4.81414	0.000523612	0.0269592
FBgn0035470	FBgn0035470	FBgn0035470	Ccz1	1.61021	1.61099	4.19656	0.00053251	0.0272405
FBgn0038980	FBgn0038980	FBgn0038980	Octbeta1R	-0.687222	-0.687463	4.66221	0.000537193	0.0273039
FBgn0015035	FBgn0015035	FBgn0015035	Cyp4e3	1.04538	1.04616	3.53688	0.000552937	0.0279251
FBgn0004584	FBgn0004584	FBgn0004584	Rrp1	0.814166	0.815413	2.96881	0.000561251	0.0281656
FBgn0038753	FBgn0038753	FBgn0038753	CG4459	1.20124	1.20366	2.44364	0.000565221	0.0281864
FBgn0019643	FBgn0019643	FBgn0019643	AANAT1	-0.66156	-0.661671	5.90477	0.000572398	0.0282484
FBgn0038224	FBgn0038224	FBgn0038224	ATPsynE	-0.801214	-0.801991	3.51982	0.000573589	0.0282484
FBgn0013763	FBgn0013763	FBgn0013763	Idgf6	-0.610532	-0.610593	6.60751	0.000578936	0.0282838
FBgn0040931	FBgn0040931	FBgn0040931	CG9034	-0.907412	-0.909485	2.16179	0.000581443	0.0282838
FBgn0029504	FBgn0029504	FBgn0029504	CHES-1-like	0.710755	0.710792	7.8652	0.000599108	0.0289654
FBgn0050502	FBgn0050502	FBgn0050502	fa2h	0.899351	0.901861	2.05045	0.000615291	0.0294315
FBgn0004374	FBgn0004374	FBgn0004374	neb	0.903208	0.905308	2.08486	0.00061807	0.0294315
FBgn0035255	FBgn0035255	FBgn0035255	RabX5	0.896333	0.897507	3.05177	0.000619885	0.0294315
FBgn0034081	FBgn0034081	FBgn0034081	CG10731	-0.998352	-1.00238	1.29963	0.000627049	0.0295945
FBgn0037908	FBgn0037908	FBgn0037908	dpr5	-0.856771	-0.85787	2.81382	0.000639955	0.0300249
FBgn0031053	FBgn0031053	FBgn0031053	CG14223	0.796261	0.796958	3.88988	0.000654448	0.030441
FBgn0037843	FBgn0037843	FBgn0037843	CG4511	0.641381	0.641684	4.35294	0.000656504	0.030441
FBgn0032021	FBgn0032021	FBgn0032021	CG7781	-0.699726	-0.700019	4.61075	0.000664476	0.0305031
FBgn0036179	FBgn0036179	FBgn0036179	CG7368	0.668203	0.668586	4.30168	0.000665536	0.0305031
FBgn0051755	FBgn0051755	FBgn0051755	SoYb	0.74253	0.743458	3.21345	0.00068847	0.0313728
FBgn0061356	FBgn0061356	FBgn0061356	CG18003	-0.85799	-0.859143	2.99884	0.000725646	0.032621
FBgn0035287	FBgn0035287	FBgn0035287	CG13937	-0.695082	-0.695235	5.94455	0.000726699	0.032621
FBgn0038956	FBgn0038956	FBgn0038956	CAH8	1.13247	1.13452	2.73901	0.000728202	0.032621
FBgn0043364	FBgn0043364	FBgn0043364	cbt	0.882474	0.882521	7.53098	0.00073398	0.0326211
FBgn0037230	FBgn0037230	FBgn0037230	Nepl11	-0.743571	-0.743709	5.9913	0.000736432	0.0326211
FBgn0013972	FBgn0013972	FBgn0013972	Gycalpha99B	-0.686581	-0.686831	4.72551	0.000742721	0.0327168
FBgn0038390	FBgn0038390	FBgn0038390	Rbf2	1.28525	1.28809	2.34658	0.000755237	0.0330844
FBgn0010395	FBgn0010395	FBgn0010395	Itgbn	1.13236	1.13328	3.42379	0.000780229	0.0339914
FBgn0002565	FBgn0002565	FBgn0002565	Lsp2	-0.858289	-0.858421	5.89358	0.000792974	0.0342674
FBgn0032139	FBgn0032139	FBgn0032139	CG13116	0.83125	0.831799	3.78347	0.000795209	0.0342674
FBgn0031092	FBgn0031092	FBgn0031092	CG9577	-0.864178	-0.865653	2.67947	0.000849583	0.036059
FBgn0015765	FBgn0015765	FBgn0015765	p38a	0.769915	0.770551	3.83933	0.00085137	0.036059
FBgn0051016	FBgn0051016	FBgn0051016	CG31016	1.27568	1.27718	3.02559	0.000857265	0.036059
FBgn0001150	FBgn0001150	FBgn0001150	gt	-0.839612	-0.839774	5.88677	0.000857807	0.036059
FBgn0039854	FBgn0039854	FBgn0039854	CG1635	-0.783703	-0.784256	4.00892	0.000867017	0.036059
FBgn0035538	FBgn0035538	FBgn0035538	DopEcR	-0.557061	-0.557066	10.2236	0.00086743	0.036059
FBgn0039098	FBgn0039098	FBgn0039098	GILT3	1.00891	1.01053	2.66299	0.000868617	0.036059
FBgn0035578	FBgn0035578	FBgn0035578	CG13707	0.775986	0.77665	4.08998	0.000891556	0.0368185
FBgn0039647	FBgn0039647	FBgn0039647	jus	0.68755	0.687577	8.72785	0.000898735	0.0369226
FBgn0000721	FBgn0000721	FBgn0000721	for	0.552615	0.552635	7.88903	0.000903454	0.0369252
FBgn0037797	FBgn0037797	FBgn0037797	CG12420	0.97684	0.978229	3.06459	0.000929892	0.0378108
FBgn0037386	FBgn0037386	FBgn0037386	CG1208	-0.920802	-0.922514	2.40457	0.000935619	0.0378496
FBgn0262139	FBgn0262139	FBgn0262139	trh	-0.687287	-0.687492	5.05101	0.00095714	0.0385237
FBgn0037164	FBgn0037164	FBgn0037164	CG11438	-1.88641	-1.88768	4.81057	0.000984987	0.0394442
FBgn0051363	FBgn0051363	FBgn0051363	Jupiter	0.587117	0.587172	6.61194	0.000992769	0.0395561
FBgn0039465	FBgn0039465	FBgn0039465	Tsp97E	0.675566	0.675587	7.95362	0.00100379	0.0397723
FBgn0051075	FBgn0051075	FBgn0051075	CG31075	-0.790335	-0.7907	4.39892	0.00101244	0.0397723
FBgn0039689	FBgn0039689	FBgn0039689	CIA30	1.51167	1.51303	3.47922	0.00101324	0.0397723
FBgn0003089	FBgn0003089	FBgn0003089	pip	0.919734	0.92068	3.53679	0.00104158	0.0406833
FBgn0035916	FBgn0035916	FBgn0035916	GAPsec	-1.46559	-1.46589	7.0872	0.001062	0.0412775
FBgn0033741	FBgn0033741	FBgn0033741	CG8545	0.809972	0.810493	3.84125	0.00108179	0.0418414
FBgn0263738	FBgn0263738	FBgn0263738	Ada2a	-0.778988	-0.779369	4.15487	0.00109651	0.042205
FBgn0037387	FBgn0037387	FBgn0037387	CG1213	-0.68441	-0.684522	5.95069	0.00110978	0.0425094
FBgn0030350	FBgn0030350	FBgn0030350	SelG	-0.843178	-0.844517	2.72339	0.00113173	0.0429821
FBgn0001977	FBgn0001977	FBgn0001977	CIAPIN1	-0.64328	-0.643428	5.47288	0.00113296	0.0429821
FBgn0262482	FBgn0262482	FBgn0262482	CG43072	-0.814459	-0.815132	3.27242	0.00114631	0.0432815
FBgn0031996	FBgn0031996	FBgn0031996	CG8460	0.849776	0.850854	2.89479	0.00121171	0.0453323
FBgn0027564	FBgn0027564	FBgn0027564	CG3149	-0.769756	-0.770177	4.86817	0.00121206	0.0453323
FBgn0035293	FBgn0035293	FBgn0035293	CG5687	-0.703941	-0.70421	4.77088	0.00122644	0.0454959
FBgn0001257	FBgn0001257	FBgn0001257	ImpL2	0.723825	0.724008	5.35553	0.00122791	0.0454959
FBgn0031424	FBgn0031424	FBgn0031424	VGlut	-0.647098	-0.647148	6.96245	0.00123722	0.0456276
FBgn0035904	FBgn0035904	FBgn0035904	GstO3	0.603902	0.604235	4.33503	0.00126985	0.046614
FBgn0034885	FBgn0034885	FBgn0034885	Eglp4	-0.645533	-0.645724	4.95536	0.00128802	0.0470633
FBgn0029716	FBgn0029716	FBgn0029716	CG3546	1.22636	1.22793	2.95065	0.00131542	0.0478437
FBgn0000527	FBgn0000527	FBgn0000527	e	-0.695985	-0.696161	5.15841	0.00132962	0.0481396
FBgn0038130	FBgn0038130	FBgn0038130	CG8630	-1.08944	-1.09077	3.19096	0.00135814	0.0489457
FBgn0042627	FBgn0042627	FBgn0042627	FASN2	1.83045	1.83149	3.77164	0.00136643	0.0489457
FBgn0263655	FBgn0263655	FBgn0263655	CG43646	1.12855	1.13007	2.66517	0.00137041	0.0489457
FBgn0053180	FBgn0053180	FBgn0053180	Ranbp16	-0.582338	-0.582378	6.92724	0.00139056	0.049443
FBgn0037167	FBgn0037167	FBgn0037167	CG11425	-1.80077	-1.80544	3.26366	0.00139919	0.0495274
FBgn0036416	FBgn0036416	FBgn0036416	CG7924	1.00007	1.00089	3.56184	0.001407	0.0495691
FBgn0086673	FBgn0086673	FBgn0086673	CG13272	-1.14481	-1.14591	3.78598	0.00141287	0.0495691

## Sheet: D30
	genes	FbgnID	symbol	logFC	unshrunk.logFC	logCPM	PValue	FDR
FBgn0039925	FBgn0039925	FBgn0039925	Kif3C	2.86427	2.86494	5.56784	4.64279e-34	3.68127e-30
FBgn0050295	FBgn0050295	FBgn0050295	Ipk1	2.21932	2.21943	7.64452	8.9098e-31	3.53229e-27
FBgn0033367	FBgn0033367	FBgn0033367	PPO2	-2.22202	-2.22295	5.27743	3.97026e-25	1.04934e-21
FBgn0054002	FBgn0054002	FBgn0054002	CG34002	2.47919	2.48372	2.4767	1.26328e-23	2.50414e-20
FBgn0014135	FBgn0014135	FBgn0014135	bnl	2.39521	2.39532	7.91233	2.5586e-21	4.05742e-18
FBgn0000079	FBgn0000079	FBgn0000079	Amy-p	2.26369	2.26449	4.51511	6.39199e-21	8.44701e-18
FBgn0032109	FBgn0032109	FBgn0032109	CG17005	-4.80483	-4.80504	8.98909	1.88877e-19	2.13944e-16
FBgn0033863	FBgn0033863	FBgn0033863	CG13337	1.71255	1.71307	5.31315	5.06715e-19	5.02217e-16
FBgn0036995	FBgn0036995	FBgn0036995	atk	1.73043	1.7316	3.69012	3.46007e-18	3.04832e-15
FBgn0032614	FBgn0032614	FBgn0032614	CG13284	1.43246	1.43251	8.18507	4.60866e-18	3.65421e-15
FBgn0020908	FBgn0020908	FBgn0020908	Scp1	2.63449	2.63736	3.02652	1.38286e-16	9.96794e-14
FBgn0034276	FBgn0034276	FBgn0034276	Sardh	1.82205	1.82357	3.08159	1.7477e-16	1.15479e-13
FBgn0032850	FBgn0032850	FBgn0032850	Kua	2.32615	2.33005	2.57786	1.47149e-15	8.97494e-13
FBgn0005664	FBgn0005664	FBgn0005664	Crys	-1.56373	-1.56393	6.99356	1.65937e-14	9.39796e-12
FBgn0042201	FBgn0042201	FBgn0042201	Nplp3	-1.61094	-1.61157	5.41914	3.24831e-14	1.71706e-11
FBgn0027790	FBgn0027790	FBgn0027790	GV1	-1.33244	-1.33304	4.64965	4.0457e-14	2.0049e-11
FBgn0023550	FBgn0023550	FBgn0023550	FarO	-2.7957	-2.79653	5.78971	4.80826e-14	2.24263e-11
FBgn0053003	FBgn0053003	FBgn0053003	CG33003	3.55012	3.553	5.26425	6.13724e-14	2.70345e-11
FBgn0036179	FBgn0036179	FBgn0036179	CG7368	1.29864	1.29926	4.30168	7.09683e-14	2.96162e-11
FBgn0027070	FBgn0027070	FBgn0027070	Ugt36E1	1.67777	1.67875	3.94349	9.61796e-14	3.81304e-11
FBgn0038957	FBgn0038957	FBgn0038957	CG7059	1.67914	1.68106	3.0086	1.09549e-13	4.13624e-11
FBgn0002542	FBgn0002542	FBgn0002542	lds	1.48401	1.48522	3.74884	1.60231e-13	5.77487e-11
FBgn0033475	FBgn0033475	FBgn0033475	CG12129	2.21686	2.22066	2.4953	1.89308e-13	6.5262e-11
FBgn0033174	FBgn0033174	FBgn0033174	CG11125	1.78169	1.78424	2.93299	2.18796e-13	7.22846e-11
FBgn0032699	FBgn0032699	FBgn0032699	CG10383	1.77176	1.772	5.82314	2.29637e-13	7.28317e-11
FBgn0260719	FBgn0260719	FBgn0260719	CR42546	2.46117	2.46216	5.13951	3.85683e-13	1.17619e-10
FBgn0032805	FBgn0032805	FBgn0032805	CG10337	2.05042	2.05332	3.70987	4.17785e-13	1.2269e-10
FBgn0285926	FBgn0285926	FBgn0285926	Imp	1.08596	1.08602	7.71422	4.95879e-13	1.40422e-10
FBgn0039647	FBgn0039647	FBgn0039647	jus	1.36676	1.3668	8.72785	5.68533e-13	1.55445e-10
FBgn0035181	FBgn0035181	FBgn0035181	CG9205	-1.41403	-1.41435	5.77629	7.57909e-13	2.00315e-10
FBgn0032494	FBgn0032494	FBgn0032494	CG5945	-1.35184	-1.35264	4.72418	8.32304e-13	2.12882e-10
FBgn0037560	FBgn0037560	FBgn0037560	CR18228	1.53873	1.53979	3.88852	1.10447e-12	2.73668e-10
FBgn0283437	FBgn0283437	FBgn0283437	PPO1	-1.88779	-1.88983	3.81491	1.70174e-12	4.08881e-10
FBgn0004516	FBgn0004516	FBgn0004516	Gad1	-1.30617	-1.30636	6.22958	1.81963e-12	4.24348e-10
FBgn0052580	FBgn0052580	FBgn0052580	Muc14A	1.62918	1.62964	4.89551	2.04916e-12	4.64222e-10
FBgn0002563	FBgn0002563	FBgn0002563	Lsp1beta	-1.60047	-1.60066	6.94944	2.86421e-12	6.30843e-10
FBgn0015351	FBgn0015351	FBgn0015351	CG14906	1.69446	1.69595	3.98685	3.06411e-12	6.5663e-10
FBgn0021738	FBgn0021738	FBgn0021738	Crg-1	1.49983	1.5	6.49737	3.67274e-12	7.66347e-10
FBgn0284408	FBgn0284408	FBgn0284408	trol	-0.991143	-0.991162	9.05932	3.98826e-12	8.10843e-10
FBgn0034558	FBgn0034558	FBgn0034558	Cib2	1.56842	1.569	4.61209	4.85649e-12	9.62679e-10
FBgn0285912	FBgn0285912	FBgn0285912	mah	1.90669	1.9074	5.16018	6.77173e-12	1.30959e-09
FBgn0038827	FBgn0038827	FBgn0038827	Fancd2	1.71764	1.71898	3.62122	8.73532e-12	1.6491e-09
FBgn0023518	FBgn0023518	FBgn0023518	trr	-0.993761	-0.993799	8.27859	9.60683e-12	1.77146e-09
FBgn0038236	FBgn0038236	FBgn0038236	Cyp313a1	-1.55159	-1.55183	6.3285	1.96108e-11	3.53395e-09
FBgn0013323	FBgn0013323	FBgn0013323	Ptth	1.62861	1.63223	2.50744	2.05008e-11	3.61223e-09
FBgn0283499	FBgn0283499	FBgn0283499	InR	1.36553	1.36558	7.91302	4.76186e-11	8.208e-09
FBgn0034487	FBgn0034487	FBgn0034487	Efhc1.2	1.78674	1.78922	3.28821	4.93897e-11	8.33215e-09
FBgn0027341	FBgn0027341	FBgn0027341	Gfat1	-1.36652	-1.36703	5.03082	8.09389e-11	1.33701e-08
FBgn0015229	FBgn0015229	FBgn0015229	glec	1.12134	1.12157	5.58422	8.28172e-11	1.34012e-08
FBgn0034728	FBgn0034728	FBgn0034728	rad50	1.0777	1.07796	5.30695	1.28085e-10	2.03118e-08
FBgn0016675	FBgn0016675	FBgn0016675	Lectin-galC1	1.64398	1.64868	1.93389	1.36146e-10	2.11668e-08
FBgn0266000	FBgn0266000	FBgn0266000	CG44774	1.23973	1.23983	6.96531	1.59628e-10	2.43402e-08
FBgn0020372	FBgn0020372	FBgn0020372	TM4SF	-1.53593	-1.53668	4.57834	1.98194e-10	2.96506e-08
FBgn0262970	FBgn0262970	FBgn0262970	CR43281	1.72975	1.73112	3.44928	2.17618e-10	3.19535e-08
FBgn0005355	FBgn0005355	FBgn0005355	Su(fu)	-1.30376	-1.30428	4.81414	2.43611e-10	3.51199e-08
FBgn0045842	FBgn0045842	FBgn0045842	yuri	1.18888	1.18921	4.95423	2.88025e-10	4.0533e-08
FBgn0032797	FBgn0032797	FBgn0032797	Hasp	-1.1973	-1.19734	8.14778	2.91384e-10	4.0533e-08
FBgn0040074	FBgn0040074	FBgn0040074	retinin	-1.44098	-1.44125	6.7253	3.21399e-10	4.39165e-08
FBgn0036661	FBgn0036661	FBgn0036661	CG9705	1.19039	1.19059	5.87611	3.26785e-10	4.39165e-08
FBgn0033473	FBgn0033473	FBgn0033473	CG12128	1.26827	1.26865	4.71629	3.40182e-10	4.4955e-08
FBgn0002121	FBgn0002121	FBgn0002121	l(2)gl	1.48711	1.48713	9.4689	4.52514e-10	5.88195e-08
FBgn0033864	FBgn0033864	FBgn0033864	CG18368	1.32493	1.32546	4.84341	4.89186e-10	6.25606e-08
FBgn0037141	FBgn0037141	FBgn0037141	DNApol-eta	1.28678	1.2874	4.35895	6.06177e-10	7.62917e-08
FBgn0030721	FBgn0030721	FBgn0030721	CG12698	1.4757	1.47783	2.65485	7.04766e-10	8.73139e-08
FBgn0037151	FBgn0037151	FBgn0037151	CG7130	1.49884	1.50226	2.57614	7.49774e-10	9.14609e-08
FBgn0019643	FBgn0019643	FBgn0019643	AANAT1	-1.08497	-1.08519	5.90477	1.02374e-09	1.22988e-07
FBgn0029507	FBgn0029507	FBgn0029507	Tsp42Ed	1.47889	1.48001	3.40899	1.0469e-09	1.23894e-07
FBgn0038074	FBgn0038074	FBgn0038074	Gnmt	1.34789	1.34809	5.47048	1.30149e-09	1.51757e-07
FBgn0003187	FBgn0003187	FBgn0003187	qua	1.54361	1.54657	2.28915	1.40412e-09	1.61352e-07
FBgn0038465	FBgn0038465	FBgn0038465	Irc	1.3116	1.31186	5.2658	1.45176e-09	1.64443e-07
FBgn0034512	FBgn0034512	FBgn0034512	CG18067	1.25906	1.25917	6.44438	1.5157e-09	1.69268e-07
FBgn0032945	FBgn0032945	FBgn0032945	CG8665	1.16672	1.16695	4.99154	1.73335e-09	1.90885e-07
FBgn0250907	FBgn0250907	FBgn0250907	Cht10	1.54931	1.55031	3.65435	2.09409e-09	2.27453e-07
FBgn0037531	FBgn0037531	FBgn0037531	CG10445	1.43028	1.43277	2.37211	2.21524e-09	2.35128e-07
FBgn0014455	FBgn0014455	FBgn0014455	Ahcy	1.33741	1.33784	4.57447	2.22407e-09	2.35128e-07
FBgn0003479	FBgn0003479	FBgn0003479	spn-A	1.64524	1.64782	2.74218	2.75009e-09	2.86914e-07
FBgn0040849	FBgn0040849	FBgn0040849	Ir41a	1.50943	1.51055	3.65937	3.21239e-09	3.30793e-07
FBgn0034390	FBgn0034390	FBgn0034390	CG15093	1.40361	1.40439	3.86618	3.32767e-09	3.38271e-07
FBgn0030482	FBgn0030482	FBgn0030482	CG1673	1.42867	1.42895	5.17409	4.66193e-09	4.67905e-07
FBgn0034935	FBgn0034935	FBgn0034935	Orcokinin	1.47682	1.47719	5.59762	4.76662e-09	4.72338e-07
FBgn0001150	FBgn0001150	FBgn0001150	gt	-1.44756	-1.44792	5.88677	4.82525e-09	4.72338e-07
FBgn0010114	FBgn0010114	FBgn0010114	hig	-1.27272	-1.27277	8.89379	5.04848e-09	4.88164e-07
FBgn0010241	FBgn0010241	FBgn0010241	Mdr50	1.24381	1.2449	3.20335	5.13674e-09	4.90714e-07
FBgn0037646	FBgn0037646	FBgn0037646	CAHbeta	1.35372	1.3546	3.79334	5.48322e-09	5.17577e-07
FBgn0039536	FBgn0039536	FBgn0039536	unc80	-1.13488	-1.13491	8.60324	5.7317e-09	5.34666e-07
FBgn0028622	FBgn0028622	FBgn0028622	qsm	0.876681	0.876876	5.21292	6.28896e-09	5.79827e-07
FBgn0039250	FBgn0039250	FBgn0039250	Mink	1.58182	1.58414	2.75697	8.76506e-09	7.9883e-07
FBgn0020416	FBgn0020416	FBgn0020416	Idgf1	1.13801	1.13881	3.30237	9.52714e-09	8.58417e-07
FBgn0011603	FBgn0011603	FBgn0011603	ine	-1.05951	-1.05979	5.37598	9.90856e-09	8.82752e-07
FBgn0000053	FBgn0000053	FBgn0000053	Gart	1.05162	1.0517	6.54543	1.03214e-08	9.09313e-07
FBgn0083956	FBgn0083956	FBgn0083956	CG34120	-0.934303	-0.934342	8.01989	1.08029e-08	9.40471e-07
FBgn0016919	FBgn0016919	FBgn0016919	nompB	1.93071	1.93084	7.58532	1.09123e-08	9.40471e-07
FBgn0032637	FBgn0032637	FBgn0032637	CG5050	1.64404	1.64559	3.42956	1.14028e-08	9.72182e-07
FBgn0262167	FBgn0262167	FBgn0262167	ana1	1.00683	1.00713	4.87721	1.21694e-08	1.0265e-06
FBgn0267163	FBgn0267163	FBgn0267163	CG45603	2.01982	2.02635	1.5806	1.32574e-08	1.1065e-06
FBgn0013972	FBgn0013972	FBgn0013972	Gycalpha99B	-1.09466	-1.09513	4.72551	1.40402e-08	1.15963e-06
FBgn0031925	FBgn0031925	FBgn0031925	Cyp4d21	-1.18988	-1.19022	5.33496	1.50364e-08	1.22911e-06
FBgn0031888	FBgn0031888	FBgn0031888	Pvf2	1.31276	1.31488	2.33303	1.66017e-08	1.34321e-06
FBgn0039298	FBgn0039298	FBgn0039298	to	-1.42307	-1.42512	3.07477	1.80462e-08	1.44534e-06
FBgn0054045	FBgn0054045	FBgn0054045	CG34045	1.70095	1.7053	2.48242	2.20937e-08	1.75181e-06
FBgn0038398	FBgn0038398	FBgn0038398	sxe2	-0.977269	-0.977491	5.56541	2.27164e-08	1.78335e-06
FBgn0031267	FBgn0031267	FBgn0031267	Ipk2	1.39346	1.39628	2.44832	2.76111e-08	2.14636e-06
FBgn0037076	FBgn0037076	FBgn0037076	ebd2	1.08368	1.08433	3.88873	2.79975e-08	2.15526e-06
FBgn0005777	FBgn0005777	FBgn0005777	PpD3	-0.930487	-0.930589	6.41844	2.89046e-08	2.2037e-06
FBgn0000038	FBgn0000038	FBgn0000038	nAChRbeta1	-1.18616	-1.18627	6.88831	3.2778e-08	2.44489e-06
FBgn0027584	FBgn0027584	FBgn0027584	CG4757	1.57653	1.57868	2.80112	3.29068e-08	2.44489e-06
FBgn0027889	FBgn0027889	FBgn0027889	ball	1.58258	1.58383	3.4384	3.29932e-08	2.44489e-06
FBgn0036665	FBgn0036665	FBgn0036665	CG13024	-1.40684	-1.40914	2.77693	3.51974e-08	2.58408e-06
FBgn0033584	FBgn0033584	FBgn0033584	CG7737	-1.64053	-1.64088	5.88389	3.77997e-08	2.74967e-06
FBgn0036880	FBgn0036880	FBgn0036880	Cpr76Bc	-1.21978	-1.22108	3.80835	3.94762e-08	2.84552e-06
FBgn0027106	FBgn0027106	FBgn0027106	Inx7	-1.31878	-1.31933	4.44488	4.52335e-08	3.23114e-06
FBgn0050489	FBgn0050489	FBgn0050489	Cyp12d1-p	1.54099	1.54276	2.79705	5.21182e-08	3.68969e-06
FBgn0038897	FBgn0038897	FBgn0038897	CG5849	1.6398	1.64121	3.41771	5.31702e-08	3.72409e-06
FBgn0038820	FBgn0038820	FBgn0038820	CG4000	-1.57456	-1.57671	3.1525	5.35434e-08	3.72409e-06
FBgn0032140	FBgn0032140	FBgn0032140	CG13117	1.34681	1.3477	3.71082	5.83092e-08	4.02029e-06
FBgn0004580	FBgn0004580	FBgn0004580	Cbp53E	-0.990182	-0.990549	4.73176	6.33366e-08	4.32928e-06
FBgn0261588	FBgn0261588	FBgn0261588	pdm3	-0.96282	-0.962916	6.67819	6.41019e-08	4.34414e-06
FBgn0011661	FBgn0011661	FBgn0011661	Moe	1.33483	1.33485	9.1934	6.80395e-08	4.57191e-06
FBgn0033354	FBgn0033354	FBgn0033354	FANCI	1.14185	1.14305	3.23749	7.08101e-08	4.7181e-06
FBgn0034504	FBgn0034504	FBgn0034504	CG8929	-0.901518	-0.901537	8.99826	7.42596e-08	4.9067e-06
FBgn0031996	FBgn0031996	FBgn0031996	CG8460	1.36748	1.36896	2.89479	7.73484e-08	5.06856e-06
FBgn0038491	FBgn0038491	FBgn0038491	CG5292	1.45688	1.4582	3.54202	7.9698e-08	5.17972e-06
FBgn0030778	FBgn0030778	FBgn0030778	CG4678	-1.11845	-1.11882	4.91664	8.57741e-08	5.52929e-06
FBgn0034281	FBgn0034281	FBgn0034281	CG14490	1.25155	1.25259	3.4306	8.74125e-08	5.58946e-06
FBgn0025456	FBgn0025456	FBgn0025456	CREG	1.13866	1.13959	3.64424	1.01797e-07	6.45718e-06
FBgn0003295	FBgn0003295	FBgn0003295	ru	-1.62121	-1.62191	4.82611	1.138e-07	7.16125e-06
FBgn0002940	FBgn0002940	FBgn0002940	ninaE	0.982917	0.982919	12.9796	1.1475e-07	7.16417e-06
FBgn0000052	FBgn0000052	FBgn0000052	Pfas	1.22938	1.22948	6.50581	1.67529e-07	1.03776e-05
FBgn0036627	FBgn0036627	FBgn0036627	Gagr	1.09395	1.09455	3.85757	1.74242e-07	1.07098e-05
FBgn0037304	FBgn0037304	FBgn0037304	CG1113	1.1094	1.11049	3.55312	1.8344e-07	1.11884e-05
FBgn0026090	FBgn0026090	FBgn0026090	CG14812	1.02914	1.02993	3.63253	1.85685e-07	1.12389e-05
FBgn0035160	FBgn0035160	FBgn0035160	hng3	1.32167	1.32433	2.30822	1.95148e-07	1.16598e-05
FBgn0031264	FBgn0031264	FBgn0031264	CG11835	1.28782	1.28934	3.01764	1.95579e-07	1.16598e-05
FBgn0003292	FBgn0003292	FBgn0003292	rt	1.05815	1.05901	3.38388	2.10442e-07	1.24522e-05
FBgn0051100	FBgn0051100	FBgn0051100	CG31100	1.3811	1.38235	3.16941	2.14779e-07	1.26147e-05
FBgn0035833	FBgn0035833	FBgn0035833	CG7565	-1.10756	-1.10795	4.80587	2.19304e-07	1.27857e-05
FBgn0053180	FBgn0053180	FBgn0053180	Ranbp16	-0.862172	-0.862237	6.92724	2.24849e-07	1.30133e-05
FBgn0040733	FBgn0040733	FBgn0040733	CG15068	1.79726	1.7978	4.28632	2.32075e-07	1.33342e-05
FBgn0010246	FBgn0010246	FBgn0010246	Myo61F	1.11475	1.11615	2.72233	2.60974e-07	1.48868e-05
FBgn0002534	FBgn0002534	FBgn0002534	Lcp3	1.18705	1.18918	2.52728	2.79677e-07	1.58397e-05
FBgn0001137	FBgn0001137	FBgn0001137	grk	1.27738	1.27864	3.22679	2.97038e-07	1.67037e-05
FBgn0261016	FBgn0261016	FBgn0261016	clos	1.23795	1.24053	2.54225	3.34717e-07	1.86899e-05
FBgn0038419	FBgn0038419	FBgn0038419	CG14879	1.36204	1.36355	3.01885	3.57024e-07	1.97961e-05
FBgn0266377	FBgn0266377	FBgn0266377	Pde8	-1.34354	-1.34359	8.78191	3.86212e-07	2.12658e-05
FBgn0004374	FBgn0004374	FBgn0004374	neb	1.29533	1.29801	2.08486	3.90401e-07	2.13482e-05
FBgn0004362	FBgn0004362	FBgn0004362	HmgD	0.93095	0.931375	4.26564	4.14921e-07	2.25336e-05
FBgn0043792	FBgn0043792	FBgn0043792	CG30427	-0.980013	-0.980544	4.37493	4.63261e-07	2.49877e-05
FBgn0029716	FBgn0029716	FBgn0029716	CG3546	1.90709	1.90909	2.95065	5.16854e-07	2.76901e-05
FBgn0264339	FBgn0264339	FBgn0264339	CG43795	-1.01949	-1.01967	5.90314	5.48744e-07	2.91637e-05
FBgn0038693	FBgn0038693	FBgn0038693	unc79	-1.02712	-1.02716	8.08687	5.51716e-07	2.91637e-05
FBgn0035287	FBgn0035287	FBgn0035287	CG13937	-0.982997	-0.983238	5.94455	6.05894e-07	3.18154e-05
FBgn0029167	FBgn0029167	FBgn0029167	Hml	-0.917095	-0.917213	6.13016	6.27672e-07	3.27422e-05
FBgn0037627	FBgn0037627	FBgn0037627	CG13318	-1.48593	-1.48601	7.78907	6.45896e-07	3.34726e-05
FBgn0052512	FBgn0052512	FBgn0052512	CG32512	1.02385	1.0243	4.60188	7.04727e-07	3.62843e-05
FBgn0034117	FBgn0034117	FBgn0034117	CG7997	1.11277	1.11314	4.69531	7.18643e-07	3.67621e-05
FBgn0051697	FBgn0051697	FBgn0051697	CG31697	-1.24591	-1.24754	3.10109	7.63214e-07	3.87918e-05
FBgn0085452	FBgn0085452	FBgn0085452	CG34423	1.29166	1.29314	2.66057	8.84339e-07	4.4662e-05
FBgn0011674	FBgn0011674	FBgn0011674	insc	0.845309	0.845701	4.14359	9.11351e-07	4.57348e-05
FBgn0011828	FBgn0011828	FBgn0011828	Pxn	-0.836918	-0.837105	5.37119	9.44195e-07	4.69478e-05
FBgn0052121	FBgn0052121	FBgn0052121	CG32121	1.15433	1.15591	2.80728	9.47364e-07	4.69478e-05
FBgn0035255	FBgn0035255	FBgn0035255	RabX5	1.25351	1.25498	3.05177	9.96941e-07	4.90978e-05
FBgn0051897	FBgn0051897	FBgn0051897	CG31897	1.12075	1.12189	3.28705	1.06185e-06	5.19716e-05
FBgn0263353	FBgn0263353	FBgn0263353	CG11000	-0.958626	-0.958676	7.60251	1.13338e-06	5.51322e-05
FBgn0031053	FBgn0031053	FBgn0031053	CG14223	1.09937	1.10024	3.88988	1.17987e-06	5.70436e-05
FBgn0065035	FBgn0065035	FBgn0065035	AlkB	1.29613	1.29972	2.05685	1.22959e-06	5.90873e-05
FBgn0027575	FBgn0027575	FBgn0027575	GABA-B-R2	-1.00791	-1.00807	6.11222	1.26271e-06	6.03135e-05
FBgn0035092	FBgn0035092	FBgn0035092	Nplp1	-1.19151	-1.19216	4.46751	1.306e-06	6.20076e-05
FBgn0067779	FBgn0067779	FBgn0067779	dbr	0.919908	0.92001	6.5037	1.33541e-06	6.30265e-05
FBgn0025702	FBgn0025702	FBgn0025702	Srpk79D	0.772188	0.772234	7.41529	1.37041e-06	6.42957e-05
FBgn0040299	FBgn0040299	FBgn0040299	Myo28B1	1.39633	1.39657	5.98129	1.39281e-06	6.49624e-05
FBgn0004587	FBgn0004587	FBgn0004587	B52	-0.838275	-0.838282	10.0807	1.41046e-06	6.54009e-05
FBgn0037236	FBgn0037236	FBgn0037236	Skp2	1.35075	1.35244	2.97083	1.47443e-06	6.75905e-05
FBgn0264272	FBgn0264272	FBgn0264272	mwh	-1.09968	-1.09983	6.60906	1.47473e-06	6.75905e-05
FBgn0003053	FBgn0003053	FBgn0003053	peb	-0.89357	-0.893594	8.66418	1.57485e-06	7.17645e-05
FBgn0038455	FBgn0038455	FBgn0038455	CG14907	1.05492	1.05547	4.6122	1.64702e-06	7.46243e-05
FBgn0086778	FBgn0086778	FBgn0086778	nAChRalpha7	-0.946988	-0.94708	6.72237	1.70156e-06	7.66573e-05
FBgn0028704	FBgn0028704	FBgn0028704	Nckx30C	-0.901769	-0.901794	8.5493	1.79046e-06	8.02064e-05
FBgn0000721	FBgn0000721	FBgn0000721	for	0.727959	0.727984	7.88903	1.80605e-06	8.04506e-05
FBgn0039203	FBgn0039203	FBgn0039203	CG13618	1.42172	1.42416	2.58023	2.001e-06	8.86363e-05
FBgn0003089	FBgn0003089	FBgn0003089	pip	1.31232	1.31352	3.53679	2.06719e-06	9.10595e-05
FBgn0003372	FBgn0003372	FBgn0003372	Sgs1	1.05775	1.05851	3.64835	2.11907e-06	9.28294e-05
FBgn0261349	FBgn0261349	FBgn0261349	Mst36Fb	1.16533	1.16781	2.01434	2.30215e-06	0.000100295
FBgn0004449	FBgn0004449	FBgn0004449	Ten-m	-0.818663	-0.818692	8.38897	2.34249e-06	0.000101251
FBgn0035538	FBgn0035538	FBgn0035538	DopEcR	-0.726886	-0.726892	10.2236	2.34962e-06	0.000101251
FBgn0263738	FBgn0263738	FBgn0263738	Ada2a	-1.10951	-1.11013	4.15487	2.3938e-06	0.000102597
FBgn0037232	FBgn0037232	FBgn0037232	Suv3	-0.79766	-0.797925	4.83177	2.42508e-06	0.000103379
FBgn0010473	FBgn0010473	FBgn0010473	tutl	-0.913729	-0.913757	8.39533	2.44196e-06	0.000103542
FBgn0040239	FBgn0040239	FBgn0040239	bc10	0.94159	0.942055	4.27476	2.48258e-06	0.000104704
FBgn0003965	FBgn0003965	FBgn0003965	v	1.00404	1.00467	3.58444	2.59068e-06	0.000108685
FBgn0010395	FBgn0010395	FBgn0010395	Itgbn	1.57811	1.57924	3.42379	2.62017e-06	0.000109344
FBgn0030159	FBgn0030159	FBgn0030159	CG9689	1.16033	1.16211	2.46737	2.6562e-06	0.000110267
FBgn0035186	FBgn0035186	FBgn0035186	CG13912	-1.56515	-1.56626	3.89574	2.72378e-06	0.000112484
FBgn0051636	FBgn0051636	FBgn0051636	CG31636	1.2284	1.23133	2.27656	2.86946e-06	0.000117886
FBgn0261385	FBgn0261385	FBgn0261385	scra	1.57239	1.57432	2.86237	3.20188e-06	0.000130864
FBgn0037930	FBgn0037930	FBgn0037930	CG14715	0.994826	0.996021	2.82041	3.25414e-06	0.000132318
FBgn0002868	FBgn0002868	FBgn0002868	MtnA	0.825286	0.825473	5.19152	3.58295e-06	0.000144945
FBgn0032530	FBgn0032530	FBgn0032530	CG9263	-1.20316	-1.20516	2.82056	3.80682e-06	0.00015322
FBgn0052196	FBgn0052196	FBgn0052196	CG32196	1.30973	1.31348	1.77842	3.90818e-06	0.000156505
FBgn0003483	FBgn0003483	FBgn0003483	spn-E	1.64914	1.64999	3.81588	3.94445e-06	0.000157163
FBgn0051098	FBgn0051098	FBgn0051098	CG31098	1.07668	1.07694	5.10721	3.98417e-06	0.000157953
FBgn0015765	FBgn0015765	FBgn0015765	p38a	1.032	1.03279	3.83933	4.08763e-06	0.000161248
FBgn0052793	FBgn0052793	FBgn0052793	CG32793	1.50645	1.50968	2.20905	4.31346e-06	0.000169314
FBgn0262570	FBgn0262570	FBgn0262570	CG43110	1.44571	1.44625	4.30409	4.40514e-06	0.000171128
FBgn0003515	FBgn0003515	FBgn0003515	st	0.899633	0.900134	4.35282	4.41996e-06	0.000171128
FBgn0086347	FBgn0086347	FBgn0086347	Myo31DF	0.852491	0.852617	5.96626	4.42441e-06	0.000171128
FBgn0040524	FBgn0040524	FBgn0040524	CG11052	1.10378	1.10473	3.47222	4.78896e-06	0.000184329
FBgn0260964	FBgn0260964	FBgn0260964	Vmat	-0.846102	-0.84615	7.54653	4.84445e-06	0.000185563
FBgn0263046	FBgn0263046	FBgn0263046	CG43341	1.45486	1.45683	3.52866	4.9228e-06	0.000187658
FBgn0037801	FBgn0037801	FBgn0037801	CG3999	1.26806	1.26867	3.83391	4.98379e-06	0.000189074
FBgn0261674	FBgn0261674	FBgn0261674	CG42709	-0.862241	-0.862661	4.85092	5.08786e-06	0.000192103
FBgn0029504	FBgn0029504	FBgn0029504	CHES-1-like	0.911834	0.911878	7.8652	5.15907e-06	0.000193868
FBgn0050157	FBgn0050157	FBgn0050157	CG30157	-1.25893	-1.26306	1.93487	5.22408e-06	0.000195385
FBgn0053349	FBgn0053349	FBgn0053349	ppk25	1.34847	1.35103	2.30225	5.44814e-06	0.000202809
FBgn0037262	FBgn0037262	FBgn0037262	MED31	0.788019	0.788316	4.79679	5.55277e-06	0.000205738
FBgn0040778	FBgn0040778	FBgn0040778	CG17977	1.31807	1.32169	1.93132	5.91133e-06	0.000218004
FBgn0010278	FBgn0010278	FBgn0010278	Ssrp	1.00737	1.00784	4.45405	6.10917e-06	0.000224257
FBgn0032139	FBgn0032139	FBgn0032139	CG13116	1.0986	1.09927	3.78347	6.30341e-06	0.000230321
FBgn0003463	FBgn0003463	FBgn0003463	sog	0.801484	0.801541	6.85371	6.66047e-06	0.000242252
FBgn0003062	FBgn0003062	FBgn0003062	Fib	1.06342	1.06486	2.60975	6.84798e-06	0.000247935
FBgn0022959	FBgn0022959	FBgn0022959	yps	0.916208	0.916289	6.90122	6.95988e-06	0.000250014
FBgn0052647	FBgn0052647	FBgn0052647	CG32647	0.776299	0.776329	7.90457	6.96847e-06	0.000250014
FBgn0259716	FBgn0259716	FBgn0259716	Nepl6	1.02332	1.02423	3.4946	7.1883e-06	0.000256739
FBgn0027617	FBgn0027617	FBgn0027617	CG5808	0.936105	0.9371	3.06244	7.24454e-06	0.000257587
FBgn0039594	FBgn0039594	FBgn0039594	snu	-1.17553	-1.17555	9.20562	7.81225e-06	0.000276533
FBgn0035293	FBgn0035293	FBgn0035293	CG5687	-0.94731	-0.947705	4.77088	7.90874e-06	0.000277976
FBgn0033602	FBgn0033602	FBgn0033602	Cpr47Ee	-1.09002	-1.09174	3.05939	7.92314e-06	0.000277976
FBgn0260941	FBgn0260941	FBgn0260941	app	-0.895683	-0.895689	10.8805	8.09204e-06	0.000282651
FBgn0264606	FBgn0264606	FBgn0264606	Fife	-0.810344	-0.810393	7.35464	8.44274e-06	0.000293607
FBgn0035904	FBgn0035904	FBgn0035904	GstO3	0.783812	0.784219	4.33503	8.54665e-06	0.000295923
FBgn0286785	FBgn0286785	FBgn0286785	scb	0.873969	0.874235	5.16156	8.76342e-06	0.000302109
FBgn0285944	FBgn0285944	FBgn0285944	para	-0.960438	-0.960455	9.21069	8.84573e-06	0.000303627
FBgn0052572	FBgn0052572	FBgn0052572	CG32572	1.99802	2.00106	3.63903	9.82184e-06	0.000335678
FBgn0032483	FBgn0032483	FBgn0032483	CG15482	1.26799	1.27231	1.55406	1.00002e-05	0.000340308
FBgn0039241	FBgn0039241	FBgn0039241	CG11089	0.878964	0.879044	6.19955	1.07341e-05	0.000363719
FBgn0001085	FBgn0001085	FBgn0001085	fz	-0.78031	-0.780607	4.65908	1.09194e-05	0.000368424
FBgn0264386	FBgn0264386	FBgn0264386	Ca-alpha1T	-0.843588	-0.843603	9.28466	1.10958e-05	0.00037279
FBgn0069969	FBgn0069969	FBgn0069969	CG40498	0.817777	0.817826	7.27216	1.14604e-05	0.000383417
FBgn0026409	FBgn0026409	FBgn0026409	Mpcp2	-0.796156	-0.796201	7.76851	1.17881e-05	0.000392721
FBgn0250819	FBgn0250819	FBgn0250819	CG33521	1.1552	1.15545	5.12234	1.19208e-05	0.000395482
FBgn0035806	FBgn0035806	FBgn0035806	PGRP-SD	1.16054	1.16265	2.19143	1.21538e-05	0.00040153
FBgn0036619	FBgn0036619	FBgn0036619	Cpr72Ec	-1.08207	-1.08247	5.10492	1.2998e-05	0.000427638
FBgn0040281	FBgn0040281	FBgn0040281	Aplip1	-0.772877	-0.772964	6.55604	1.30776e-05	0.000428482
FBgn0034377	FBgn0034377	FBgn0034377	CG15071	1.0357	1.0366	3.3246	1.35791e-05	0.000443082
FBgn0034290	FBgn0034290	FBgn0034290	CG5773	0.986429	0.987339	3.59609	1.39866e-05	0.000454507
FBgn0036764	FBgn0036764	FBgn0036764	CG5535	1.33903	1.34037	3.35654	1.41725e-05	0.000457774
FBgn0031094	FBgn0031094	FBgn0031094	CG9578	-1.01749	-1.01894	2.77799	1.42026e-05	0.000457774
FBgn0023441	FBgn0023441	FBgn0023441	fus	-0.871654	-0.871698	7.80423	1.45223e-05	0.000466185
FBgn0025620	FBgn0025620	FBgn0025620	CG13360	-1.18868	-1.18986	3.50841	1.5435e-05	0.000493484
FBgn0030706	FBgn0030706	FBgn0030706	Lrp4	-0.860745	-0.860806	7.14717	1.58375e-05	0.000502317
FBgn0053267	FBgn0053267	FBgn0053267	CG33267	1.09562	1.09659	3.93659	1.59278e-05	0.000502317
FBgn0051861	FBgn0051861	FBgn0051861	CG31861	1.66408	1.66597	2.72196	1.59425e-05	0.000502317
FBgn0036806	FBgn0036806	FBgn0036806	Cyp12c1	1.07169	1.07352	2.27015	1.59647e-05	0.000502317
FBgn0004620	FBgn0004620	FBgn0004620	GluRIIA	1.15341	1.15441	3.25745	1.6655e-05	0.00052073
FBgn0002526	FBgn0002526	FBgn0002526	LanA	-0.818337	-0.818493	5.56489	1.66812e-05	0.00052073
FBgn0036765	FBgn0036765	FBgn0036765	CG7408	0.976838	0.9774	3.65572	1.70748e-05	0.000530331
FBgn0040813	FBgn0040813	FBgn0040813	Nplp2	-1.29132	-1.29146	6.36038	1.71225e-05	0.000530331
FBgn0029826	FBgn0029826	FBgn0029826	CG6041	-0.944103	-0.94479	3.83399	1.75209e-05	0.000540557
FBgn0085387	FBgn0085387	FBgn0085387	shakB	-0.888669	-0.888694	8.54956	1.76069e-05	0.000541105
FBgn0260484	FBgn0260484	FBgn0260484	HIP	0.893304	0.893921	3.56362	1.7884e-05	0.000547499
FBgn0001257	FBgn0001257	FBgn0001257	ImpL2	0.932969	0.93319	5.35553	1.89626e-05	0.000578288
FBgn0032050	FBgn0032050	FBgn0032050	CG13096	1.10071	1.10229	2.47058	1.97734e-05	0.000600702
FBgn0038460	FBgn0038460	FBgn0038460	CG18622	0.792568	0.792914	4.40588	1.9895e-05	0.000602089
FBgn0040606	FBgn0040606	FBgn0040606	CG6503	-1.29555	-1.29656	3.24352	2.01179e-05	0.000604291
FBgn0004395	FBgn0004395	FBgn0004395	unk	0.709418	0.709464	7.32723	2.01202e-05	0.000604291
FBgn0029667	FBgn0029667	FBgn0029667	Gas8	1.40453	1.4068	2.38669	2.12434e-05	0.000635619
FBgn0029898	FBgn0029898	FBgn0029898	CG14439	-0.824092	-0.824514	4.43378	2.14933e-05	0.000639353
FBgn0037360	FBgn0037360	FBgn0037360	CG2182	0.692834	0.692927	6.19459	2.15295e-05	0.000639353
FBgn0037883	FBgn0037883	FBgn0037883	CG14701	1.25265	1.25523	2.11202	2.24763e-05	0.00066338
FBgn0038877	FBgn0038877	FBgn0038877	CG3308	0.771643	0.771656	9.01236	2.25059e-05	0.00066338
FBgn0039099	FBgn0039099	FBgn0039099	GILT2	1.03784	1.03935	2.38661	2.25974e-05	0.000663611
FBgn0053181	FBgn0053181	FBgn0053181	CG33181	0.732043	0.732097	6.9118	2.27404e-05	0.000665346
FBgn0029937	FBgn0029937	FBgn0029937	CG8300	0.936805	0.937427	3.89371	2.31325e-05	0.000674328
FBgn0016075	FBgn0016075	FBgn0016075	vkg	-0.749686	-0.749756	6.80213	2.35425e-05	0.000683767
FBgn0005660	FBgn0005660	FBgn0005660	Ets21C	0.964846	0.965666	3.53996	2.40638e-05	0.000696357
FBgn0002917	FBgn0002917	FBgn0002917	na	-0.740413	-0.740462	7.46209	2.44748e-05	0.000705676
FBgn0011760	FBgn0011760	FBgn0011760	ctp	0.729002	0.729037	7.57802	2.46038e-05	0.000706825
FBgn0037581	FBgn0037581	FBgn0037581	CG7352	1.12524	1.12631	3.14692	2.5324e-05	0.000724889
FBgn0033130	FBgn0033130	FBgn0033130	Tsp42Ei	0.989743	0.990552	3.33615	2.57813e-05	0.000735324
FBgn0032587	FBgn0032587	FBgn0032587	CG5953	1.28696	1.28709	6.77606	2.67326e-05	0.000759723
FBgn0033196	FBgn0033196	FBgn0033196	CG1358	-0.847028	-0.847232	5.40162	2.70511e-05	0.000766028
FBgn0035918	FBgn0035918	FBgn0035918	Cdc6	-4.43193	-4.43277	7.80404	2.7314e-05	0.000770722
FBgn0262476	FBgn0262476	FBgn0262476	CG43066	-0.803566	-0.803658	6.33705	2.751e-05	0.000773499
FBgn0262139	FBgn0262139	FBgn0262139	trh	-0.850417	-0.850687	5.05101	2.77867e-05	0.000778198
FBgn0024366	FBgn0024366	FBgn0024366	CG11409	1.20007	1.20142	2.70044	2.78734e-05	0.000778198
FBgn0010352	FBgn0010352	FBgn0010352	Nc73EF	-0.790405	-0.790413	10.1642	2.81411e-05	0.000780703
FBgn0038873	FBgn0038873	FBgn0038873	CG5892	-1.57631	-1.57716	4.22747	2.816e-05	0.000780703
FBgn0263873	FBgn0263873	FBgn0263873	sick	-0.705334	-0.705344	9.46968	2.85666e-05	0.00078683
FBgn0033730	FBgn0033730	FBgn0033730	Cpr49Ag	-1.12845	-1.1293	3.86992	2.86007e-05	0.00078683
FBgn0053517	FBgn0053517	FBgn0053517	Dop2R	-0.818965	-0.819047	6.77332	2.86788e-05	0.00078683
FBgn0037215	FBgn0037215	FBgn0037215	beta-Man	0.811911	0.812073	5.55154	2.94101e-05	0.000804112
FBgn0053970	FBgn0053970	FBgn0053970	CG33970	-0.764272	-0.764412	5.81871	2.95633e-05	0.000805525
FBgn0024963	FBgn0024963	FBgn0024963	GluClalpha	-0.985514	-0.985576	7.29131	3.04317e-05	0.000825047
FBgn0052066	FBgn0052066	FBgn0052066	CG32066	0.749769	0.749948	5.10037	3.04879e-05	0.000825047
FBgn0035429	FBgn0035429	FBgn0035429	CG12017	1.47455	1.47558	3.38795	3.16135e-05	0.000851689
FBgn0029766	FBgn0029766	FBgn0029766	CG15784	0.886893	0.887013	6.08163	3.16872e-05	0.000851689
FBgn0053202	FBgn0053202	FBgn0053202	dpr11	-0.771759	-0.771945	5.47058	3.30251e-05	0.000884649
FBgn0033913	FBgn0033913	FBgn0033913	CG8468	1.30664	1.30671	7.52962	3.33295e-05	0.000889795
FBgn0015296	FBgn0015296	FBgn0015296	Shc	0.826917	0.827273	4.46287	3.35252e-05	0.000892017
FBgn0030066	FBgn0030066	FBgn0030066	Uros1	1.05816	1.05971	2.62286	3.39589e-05	0.000900535
FBgn0266572	FBgn0266572	FBgn0266572	ebo	-0.740881	-0.740943	7.02794	3.47484e-05	0.00091768
FBgn0000152	FBgn0000152	FBgn0000152	Axs	0.803765	0.804151	4.34336	3.48369e-05	0.00091768
FBgn0259099	FBgn0259099	FBgn0259099	DCX-EMAP	-0.866404	-0.866421	8.87235	3.7915e-05	0.000995458
[truncated: 767 more rows]
