# Supplementary material for: Aging and Light Stress Result in Overlapping and Unique Gene Expression Changes in Photoreceptors
Source: Genes (Basel). 2022 Jan 29;13(2):264. doi: 10.3390/genes13020264 (PMC8872477; doi:10.3390/genes13020264)
Supplement: Supplementary file 1 [file genes-13-00264-s001.zip › Table S2.xlsx]

## Sheet: 3h_DOWN
	ID	Description	GeneRatio	BgRatio	pvalue	p.adjust	qvalue	geneID	Count
GO:0034470	GO:0034470	ncRNA processing	53/730	258/11257	2.85003e-14	7.38728e-11	5.94307e-11	RIOK1/nop5/CG12499/l(2)k09022/CG12325/CG9253/CG2260/CG5033/CG1785/CG5800/Tsr1/Nopp140/Nop60B/CG6724/CG32075/l(3)07882/CG10189/pasha/CG8939/cbc/CG11342/CG1463/CG7728/l(1)G0020/defl/CG8064/Mtr4/Rexo5/Fib/CG2911/Rrp6/CG3735/CG7009/CG6550/CG9799/IntS1/Rtc1/CG11030/Elp3/CG9107/Rpp21/CG7544/Archease/IntS11/CG8545/CG8078/Nbr/IntS3/CG3071/Dcr-1/Nnp-1/CG7275/CG18048	53
GO:0042254	GO:0042254	ribosome biogenesis	46/730	216/11257	3.8999e-13	3.96357e-10	3.18869e-10	RIOK1/CG33158/nop5/CG12499/l(2)k09022/CG12325/CG9253/Nle/CG2260/CG5033/CG1785/CG5800/Tsr1/Nopp140/Nop60B/CG6724/CG32075/l(2)k09848/Mys45A/l(3)07882/CG9246/CG8939/Surf6/CG1463/CG7728/l(1)G0020/mbm/CG8064/Mtr4/Rexo5/Fib/CG7839/Rrp6/CG2875/CG3735/CG9799/Rtc1/CG11030/CG9107/CG7544/CG8545/CG3071/Mybbp1A/Nnp-1/Tor/CG7275	46
GO:0034660	GO:0034660	ncRNA metabolic process	58/730	320/11257	5.01693e-13	3.96357e-10	3.18869e-10	RIOK1/nop5/CG12499/l(2)k09022/CG12325/CG9253/CG2260/AspRS-m/CG5033/CG1785/CG5800/Tsr1/Nopp140/Nop60B/CG6724/CG32075/l(3)07882/CG10189/pasha/CG8939/cbc/CG11342/CG1463/CG7728/l(1)G0020/defl/CG8064/Mtr4/Rexo5/Fib/CG2911/Rrp6/CG3735/CG7009/CG6550/CG9799/IntS1/Rtc1/pcm/CG11030/Elp3/CG9107/Rpp21/CG7544/Archease/LeuRS-m/IntS11/CG8545/CG8078/Nbr/IntS3/CG3071/pelo/Dcr-1/MTPAP/Nnp-1/CG7275/CG18048	58
GO:0016072	GO:0016072	rRNA metabolic process	37/730	149/11257	6.11663e-13	3.96357e-10	3.18869e-10	RIOK1/nop5/CG12499/l(2)k09022/CG12325/CG9253/CG2260/CG5033/CG1785/CG5800/Tsr1/Nopp140/Nop60B/CG6724/CG32075/l(3)07882/CG8939/CG1463/CG7728/l(1)G0020/CG8064/Mtr4/Rexo5/Fib/Rrp6/CG3735/CG9799/Rtc1/pcm/CG11030/CG9107/CG7544/CG8545/CG3071/pelo/Nnp-1/CG7275	37
GO:0034330	GO:0034330	cell junction organization	62/730	366/11257	1.71382e-12	7.94543e-10	6.39209e-10	vari/Synd/dpr6/bchs/TBCD/cora/dpr21/dpr20/Nlg2/stan/RhoGAP68F/caz/mys/dpr10/stj/dysc/nwk/Tbce/Lrrk/btsz/Frq2/DIP-gamma/Src64B/stai/mGluR/nonC/Src42A/ringer/Akt1/Sec8/loco/DIP-beta/sns/Syx18/Octbeta1R/LIMK1/metro/WASp/pasi2/Nlg3/Yif1/CG7166/Nlg4/dpr17/jar/Elp3/Nrg/Arp3/dpr11/dpr18/Tsc1/bark/Liprin-alpha/htl/velo/DIP-delta/wg/Fak/Tor/Ube3a/Pi4KIIIalpha/Cdc42	62
GO:0061564	GO:0061564	axon development	60/730	348/11257	1.83922e-12	7.94543e-10	6.39209e-10	Wnk/bchs/TBCD/CG44153/stan/Dscam3/acj6/beat-VI/beat-IIIb/mys/Dscam4/dysc/zfh1/Toll-6/tutl/E(z)/DIP-gamma/Pka-R2/Src64B/NiPp1/Src42A/Con/CadN2/Akt1/beat-IIa/kra/Dscam2/sli/enok/egh/LIMK1/Cul3/WASp/CdGAPr/Alk/nvy/DCTN1-p150/Elp3/RhoGEF2/side/Nrg/Arp3/ago/dpr11/CkIIalpha/Archease/beat-Ib/NetB/Liprin-alpha/robo3/kuz/dock/beat-Ic/velo/bsk/beat-IIb/otk/Sema2a/Tor/Cdc42	60
GO:0006364	GO:0006364	rRNA processing	35/730	142/11257	3.28836e-12	1.21763e-09	9.79584e-10	RIOK1/nop5/CG12499/l(2)k09022/CG12325/CG9253/CG2260/CG5033/CG1785/CG5800/Tsr1/Nopp140/Nop60B/CG6724/CG32075/l(3)07882/CG8939/CG1463/CG7728/l(1)G0020/CG8064/Mtr4/Rexo5/Fib/Rrp6/CG3735/CG9799/Rtc1/CG11030/CG9107/CG7544/CG8545/CG3071/Nnp-1/CG7275	35
GO:0031175	GO:0031175	neuron projection development	72/730	476/11257	7.51357e-12	2.4344e-09	1.95847e-09	Wnk/bchs/TBCD/CG44153/stan/Dscam3/Dhc64C/acj6/beat-VI/beat-IIIb/mys/Dscam4/dysc/shn/zfh1/Toll-6/Lrrk/tutl/E(z)/DIP-gamma/Pka-R2/Src64B/NiPp1/stai/Src42A/Con/CadN2/Akt1/beat-IIa/kra/Dscam2/sli/enok/egh/CG15019/LIMK1/cwo/Cul3/WASp/CdGAPr/Alk/RunxA/nvy/DCTN1-p150/Elp3/RhoGEF2/side/Nrg/Arp3/ago/dpr11/CkIIalpha/scro/Archease/beat-Ib/NetB/Liprin-alpha/robo3/kuz/dock/beat-Ic/velo/lva/bsk/TER94/beat-IIb/…	72
GO:0050808	GO:0050808	synapse organization	53/730	297/11257	9.89129e-12	2.84869e-09	2.29177e-09	Synd/dpr6/bchs/dpr21/dpr20/Nlg2/stan/RhoGAP68F/caz/mys/dpr10/stj/dysc/nwk/Tbce/Lrrk/Frq2/DIP-gamma/Src64B/stai/mGluR/nonC/Src42A/ringer/Akt1/Sec8/DIP-beta/Syx18/Octbeta1R/LIMK1/metro/WASp/Nlg3/Yif1/CG7166/Nlg4/dpr17/Elp3/Nrg/Arp3/dpr11/dpr18/Tsc1/Liprin-alpha/htl/velo/DIP-delta/wg/Fak/Tor/Ube3a/Pi4KIIIalpha/Cdc42	53
GO:0098609	GO:0098609	cell-cell adhesion	32/730	127/11257	1.50268e-11	3.89493e-09	3.13347e-09	chp/CG44153/Nlg2/stan/Dscam3/beat-VI/beat-IIIb/mys/Dscam4/fred/tutl/Src64B/Src42A/Con/CadN2/beat-IIa/Dscam2/sns/sli/egh/Nlg3/beat-IV/CG7166/Nlg4/Cad87A/Nrg/hbs/beat-Ib/mop/beat-Ic/beat-IIb/kug	32
GO:0022613	GO:0022613	ribonucleoprotein complex biogenesis	51/730	289/11257	3.78538e-11	8.91972e-09	7.17591e-09	RIOK1/CG33158/nop5/CG12499/l(2)k09022/CG12325/CG9253/Nle/CG2260/CG5033/CG1785/CG5800/Tsr1/Nopp140/Nop60B/CG6724/CG32075/l(2)k09848/Mys45A/l(3)07882/CG9246/Prp31/CG8939/Surf6/Prp8/CG1463/eIF5/CG7728/l(1)G0020/mbm/CG8064/Mtr4/Rexo5/Fib/CG7839/CG12320/Rrp6/CG2875/CG3735/CG9799/Rtc1/CG11030/CG9107/CG7544/CG8545/CG3071/Mybbp1A/Dcr-1/Nnp-1/Tor/CG7275	51
GO:0007411	GO:0007411	axon guidance	49/730	275/11257	6.51645e-11	1.40755e-08	1.13238e-08	Wnk/CG44153/stan/Dscam3/acj6/beat-VI/beat-IIIb/mys/Dscam4/dysc/zfh1/Toll-6/tutl/E(z)/DIP-gamma/Pka-R2/Src64B/NiPp1/Src42A/CadN2/beat-IIa/kra/Dscam2/sli/enok/egh/CdGAPr/Alk/nvy/Elp3/side/Nrg/ago/dpr11/CkIIalpha/beat-Ib/NetB/Liprin-alpha/robo3/kuz/dock/beat-Ic/velo/bsk/beat-IIb/otk/Sema2a/Tor/Cdc42	49
GO:0048667	GO:0048667	cell morphogenesis involved in neuron differentiation	66/730	440/11257	8.67501e-11	1.72966e-08	1.39151e-08	Wnk/TBCD/CG44153/stan/Dscam3/Dhc64C/acj6/beat-VI/beat-IIIb/cnn/mys/Dscam4/dysc/shn/zfh1/Toll-6/Lrrk/tutl/E(z)/DIP-gamma/Pka-R2/Src64B/NiPp1/Src42A/CadN2/beat-IIa/kra/Dscam2/sli/enok/egh/LIMK1/cwo/Cul3/WASp/CdGAPr/Alk/RunxA/nvy/DCTN1-p150/Elp3/RhoGEF2/side/Nrg/ago/dpr11/CkIIalpha/scro/beat-Ib/NetB/Liprin-alpha/robo3/kuz/dock/beat-Ic/velo/lva/bsk/TER94/beat-IIb/Dcr-1/otk/Sema2a/Tor/Ube3a/Cdc42	66
GO:0007409	GO:0007409	axonogenesis	55/730	335/11257	1.13598e-10	2.02298e-08	1.62748e-08	Wnk/TBCD/CG44153/stan/Dscam3/acj6/beat-VI/beat-IIIb/mys/Dscam4/dysc/zfh1/Toll-6/tutl/E(z)/DIP-gamma/Pka-R2/Src64B/NiPp1/Src42A/CadN2/beat-IIa/kra/Dscam2/sli/enok/egh/LIMK1/Cul3/WASp/CdGAPr/Alk/nvy/DCTN1-p150/Elp3/RhoGEF2/side/Nrg/ago/dpr11/CkIIalpha/beat-Ib/NetB/Liprin-alpha/robo3/kuz/dock/beat-Ic/velo/bsk/beat-IIb/otk/Sema2a/Tor/Cdc42	55
GO:0048812	GO:0048812	neuron projection morphogenesis	66/730	443/11257	1.1707e-10	2.02298e-08	1.62748e-08	Wnk/TBCD/CG44153/stan/Dscam3/Dhc64C/acj6/beat-VI/beat-IIIb/mys/Dscam4/dysc/shn/zfh1/Toll-6/Lrrk/tutl/E(z)/DIP-gamma/Pka-R2/Src64B/NiPp1/Src42A/CadN2/beat-IIa/kra/Dscam2/sli/enok/egh/CG15019/LIMK1/cwo/Cul3/WASp/CdGAPr/Alk/RunxA/nvy/DCTN1-p150/Elp3/RhoGEF2/side/Nrg/ago/dpr11/CkIIalpha/scro/beat-Ib/NetB/Liprin-alpha/robo3/kuz/dock/beat-Ic/velo/lva/bsk/TER94/beat-IIb/Dcr-1/otk/Sema2a/Tor/Ube3a/Cdc42	66
GO:0048858	GO:0048858	cell projection morphogenesis	66/730	445/11257	1.42681e-10	2.17547e-08	1.75017e-08	Wnk/TBCD/CG44153/stan/Dscam3/Dhc64C/acj6/beat-VI/beat-IIIb/mys/Dscam4/dysc/shn/zfh1/Toll-6/Lrrk/tutl/E(z)/DIP-gamma/Pka-R2/Src64B/NiPp1/Src42A/CadN2/beat-IIa/kra/Dscam2/sli/enok/egh/CG15019/LIMK1/cwo/Cul3/WASp/CdGAPr/Alk/RunxA/nvy/DCTN1-p150/Elp3/RhoGEF2/side/Nrg/ago/dpr11/CkIIalpha/scro/beat-Ib/NetB/Liprin-alpha/robo3/kuz/dock/beat-Ic/velo/lva/bsk/TER94/beat-IIb/Dcr-1/otk/Sema2a/Tor/Ube3a/Cdc42	66
GO:0120039	GO:0120039	plasma membrane bounded cell projection morphogenesis	66/730	445/11257	1.42681e-10	2.17547e-08	1.75017e-08	Wnk/TBCD/CG44153/stan/Dscam3/Dhc64C/acj6/beat-VI/beat-IIIb/mys/Dscam4/dysc/shn/zfh1/Toll-6/Lrrk/tutl/E(z)/DIP-gamma/Pka-R2/Src64B/NiPp1/Src42A/CadN2/beat-IIa/kra/Dscam2/sli/enok/egh/CG15019/LIMK1/cwo/Cul3/WASp/CdGAPr/Alk/RunxA/nvy/DCTN1-p150/Elp3/RhoGEF2/side/Nrg/ago/dpr11/CkIIalpha/scro/beat-Ib/NetB/Liprin-alpha/robo3/kuz/dock/beat-Ic/velo/lva/bsk/TER94/beat-IIb/Dcr-1/otk/Sema2a/Tor/Ube3a/Cdc42	66
GO:0006935	GO:0006935	chemotaxis	50/730	291/11257	1.5918e-10	2.2922e-08	1.84407e-08	Wnk/CG44153/stan/Dscam3/acj6/beat-VI/beat-IIIb/mys/Dscam4/dysc/zfh1/Toll-6/tutl/E(z)/DIP-gamma/Pka-R2/Src64B/NiPp1/Src42A/Con/CadN2/beat-IIa/kra/Dscam2/sli/enok/egh/CdGAPr/Alk/nvy/Elp3/side/Nrg/ago/dpr11/CkIIalpha/beat-Ib/NetB/Liprin-alpha/robo3/kuz/dock/beat-Ic/velo/bsk/beat-IIb/otk/Sema2a/Tor/Cdc42	50
GO:0098742	GO:0098742	cell-cell adhesion via plasma-membrane adhesion molecules	22/730	69/11257	1.71471e-10	2.33923e-08	1.88191e-08	chp/CG44153/stan/Dscam3/beat-VI/beat-IIIb/mys/Dscam4/tutl/Con/CadN2/beat-IIa/Dscam2/sns/beat-IV/CG7166/Cad87A/hbs/beat-Ib/beat-Ic/beat-IIb/kug	22
GO:0097485	GO:0097485	neuron projection guidance	49/730	283/11257	1.85279e-10	2.40122e-08	1.93178e-08	Wnk/CG44153/stan/Dscam3/acj6/beat-VI/beat-IIIb/mys/Dscam4/dysc/zfh1/Toll-6/tutl/E(z)/DIP-gamma/Pka-R2/Src64B/NiPp1/Src42A/CadN2/beat-IIa/kra/Dscam2/sli/enok/egh/CdGAPr/Alk/nvy/Elp3/side/Nrg/ago/dpr11/CkIIalpha/beat-Ib/NetB/Liprin-alpha/robo3/kuz/dock/beat-Ic/velo/bsk/beat-IIb/otk/Sema2a/Tor/Cdc42	49
GO:0032990	GO:0032990	cell part morphogenesis	66/730	453/11257	3.09934e-10	3.71236e-08	2.98659e-08	Wnk/TBCD/CG44153/stan/Dscam3/Dhc64C/acj6/beat-VI/beat-IIIb/mys/Dscam4/dysc/shn/zfh1/Toll-6/Lrrk/tutl/E(z)/DIP-gamma/Pka-R2/Src64B/NiPp1/Src42A/CadN2/beat-IIa/kra/Dscam2/sli/enok/egh/CG15019/LIMK1/cwo/Cul3/WASp/CdGAPr/Alk/RunxA/nvy/DCTN1-p150/Elp3/RhoGEF2/side/Nrg/ago/dpr11/CkIIalpha/scro/beat-Ib/NetB/Liprin-alpha/robo3/kuz/dock/beat-Ic/velo/lva/bsk/TER94/beat-IIb/Dcr-1/otk/Sema2a/Tor/Ube3a/Cdc42	66
GO:0000904	GO:0000904	cell morphogenesis involved in differentiation	69/730	484/11257	3.15092e-10	3.71236e-08	2.98659e-08	Wnk/Megf8/TBCD/CG44153/stan/Dscam3/Dhc64C/acj6/beat-VI/beat-IIIb/cnn/mys/Dscam4/dysc/shn/zfh1/Toll-6/Lrrk/tutl/E(z)/DIP-gamma/Pka-R2/Src64B/NiPp1/Src42A/CadN2/beat-IIa/kra/Dscam2/sli/enok/egh/LIMK1/cwo/Cul3/WASp/CdGAPr/Alk/RunxA/nvy/DCTN1-p150/Elp3/RhoGEF2/side/Nrg/ago/dpr11/CkIIalpha/scro/beat-Ib/NetB/Liprin-alpha/robo3/kuz/dock/beat-Ic/velo/lva/bsk/TER94/beat-IIb/Dcr-1/hop/otk/Sema2a/Tor/Ube3a/…	69
GO:0048589	GO:0048589	developmental growth	57/730	364/11257	3.39862e-10	3.8301e-08	3.08131e-08	vari/Synd/bchs/Nup154/Nlg2/stan/pasha/RhoGAP68F/caz/hyd/mys/stj/dysc/nwk/Tbce/Toll-6/btsz/dco/Src64B/stai/Hr4/Src42A/lig/CadN2/ringer/Akt1/Sec8/Octbeta1R/CG15019/LIMK1/metro/WASp/pcm/DCTN1-p150/Elp3/Sfmbt/RhoGEF2/Nrg/Arp3/ago/Tsc1/Sep2/Liprin-alpha/htl/kuz/Orct2/trbl/wg/bsk/Fak/otk/Sema2a/Tor/Ube3a/Pi4KIIIalpha/kug/Cdc42	57
GO:0042330	GO:0042330	taxis	54/730	348/11257	1.41991e-09	1.5335e-07	1.2337e-07	Wnk/CG44153/stan/Dscam3/acj6/beat-VI/beat-IIIb/mys/Dscam4/dysc/zfh1/Toll-6/tutl/E(z)/DIP-gamma/Pka-R2/Src64B/NiPp1/CG34353/Src42A/Con/CadN2/beat-IIa/kra/Dscam2/sli/enok/egh/CdGAPr/Alk/Dop1R1/nvy/Elp3/side/Nrg/ago/dpr11/CkIIalpha/beat-Ib/NetB/Liprin-alpha/robo3/kuz/dock/beat-Ic/velo/bsk/beat-IIb/otk/Sema2a/Tor/CG32100/CG10543/Cdc42	54
GO:0040007	GO:0040007	growth	62/730	429/11257	1.53365e-09	1.59008e-07	1.27922e-07	vari/Synd/mahj/bchs/Nup154/Nlg2/stan/pasha/RhoGAP68F/caz/hyd/mys/stj/dysc/nwk/Tbce/Toll-6/btsz/dco/Src64B/stai/Hr4/Src42A/lig/CadN2/ringer/Akt1/Sec8/Octbeta1R/CG15019/LIMK1/metro/WASp/Alk/pcm/Mnt/DCTN1-p150/Elp3/Sfmbt/RhoGEF2/Nrg/Arp3/ago/Tsc1/Sep2/mop/Liprin-alpha/htl/kuz/Orct2/srl/trbl/wg/bsk/Fak/otk/Sema2a/Tor/Ube3a/Pi4KIIIalpha/kug/Cdc42	62
GO:0007155	GO:0007155	cell adhesion	39/730	210/11257	1.7788e-09	1.77332e-07	1.42664e-07	Vinc/chp/Megf8/CG44153/cora/Nlg2/stan/Dscam3/beat-VI/beat-IIIb/mys/Dscam4/fred/mspo/tutl/Src64B/Src42A/Con/CadN2/beat-IIa/Dscam2/sns/sli/egh/Nlg3/beat-IV/CG7166/Nlg4/Cad87A/Nrg/hbs/beat-Ib/mop/Ccn/beat-Ic/beat-IIb/otk/zye/kug	39
GO:0007528	GO:0007528	neuromuscular junction development	35/730	180/11257	3.50254e-09	3.36244e-07	2.70508e-07	Synd/Nlg2/RhoGAP68F/caz/stj/dysc/nwk/Tbce/Lrrk/Frq2/DIP-gamma/Src64B/stai/mGluR/Src42A/ringer/Akt1/Sec8/Syx18/Octbeta1R/LIMK1/metro/WASp/Nlg3/Elp3/Arp3/dpr11/Liprin-alpha/htl/wg/Fak/Tor/Ube3a/Pi4KIIIalpha/Cdc42	35
GO:0022610	GO:0022610	biological adhesion	39/730	217/11257	4.7038e-09	4.35437e-07	3.50309e-07	Vinc/chp/Megf8/CG44153/cora/Nlg2/stan/Dscam3/beat-VI/beat-IIIb/mys/Dscam4/fred/mspo/tutl/Src64B/Src42A/Con/CadN2/beat-IIa/Dscam2/sns/sli/egh/Nlg3/beat-IV/CG7166/Nlg4/Cad87A/Nrg/hbs/beat-Ib/mop/Ccn/beat-Ic/beat-IIb/otk/zye/kug	39
GO:0034329	GO:0034329	cell junction assembly	39/730	228/11257	1.96525e-08	1.75652e-06	1.41312e-06	vari/Synd/TBCD/Nlg2/stan/RhoGAP68F/caz/stj/dysc/nwk/Tbce/btsz/Src64B/stai/Src42A/ringer/Akt1/Sec8/loco/sns/Octbeta1R/LIMK1/metro/WASp/pasi2/Nlg3/Nlg4/Elp3/Nrg/Arp3/bark/Liprin-alpha/htl/wg/Fak/Tor/Ube3a/Pi4KIIIalpha/Cdc42	39
GO:0050807	GO:0050807	regulation of synapse organization	31/730	159/11257	2.59058e-08	2.23826e-06	1.80068e-06	Synd/bchs/Nlg2/stan/RhoGAP68F/caz/mys/stj/dysc/nwk/Tbce/Lrrk/DIP-gamma/Src64B/Src42A/ringer/Akt1/Sec8/Octbeta1R/metro/WASp/Yif1/Arp3/dpr11/Tsc1/htl/Fak/Tor/Ube3a/Pi4KIIIalpha/Cdc42	31
GO:0051124	GO:0051124	synaptic growth at neuromuscular junction	28/730	141/11257	8.15103e-08	6.81531e-06	5.48291e-06	Synd/Nlg2/RhoGAP68F/caz/stj/dysc/nwk/Tbce/Src64B/stai/Src42A/ringer/Akt1/Sec8/Octbeta1R/LIMK1/metro/WASp/Elp3/Arp3/Liprin-alpha/htl/wg/Fak/Tor/Ube3a/Pi4KIIIalpha/Cdc42	28
GO:0007416	GO:0007416	synapse assembly	31/730	173/11257	1.94352e-07	1.45274e-05	1.16873e-05	Synd/Nlg2/stan/RhoGAP68F/caz/stj/dysc/nwk/Tbce/Src64B/stai/Src42A/ringer/Akt1/Sec8/Octbeta1R/LIMK1/metro/WASp/Nlg3/Nlg4/Elp3/Arp3/Liprin-alpha/htl/wg/Fak/Tor/Ube3a/Pi4KIIIalpha/Cdc42	31
GO:0001654	GO:0001654	eye development	53/730	390/11257	1.96165e-07	1.45274e-05	1.16873e-05	chp/salm/bchs/S/ush/Nup154/RasGAP1/stan/Lam/gl/eyg/caz/Vsx2/Afti/fred/dysc/tutl/Src64B/Src42A/CadN2/msk/sw/shtd/rno/sns/sca/LIMK1/Ns2/Cul3/PIG-V/X11L/Alk/kto/melt/dos/DCTN1-p150/hbs/CkIIalpha/NetB/Liprin-alpha/boss/ru/wg/Tak1/Arf79F/pelo/hop/cnk/Smyd4-4/Srrm1/so/Vsx1/Cdc42	53
GO:0048880	GO:0048880	sensory system development	53/730	390/11257	1.96165e-07	1.45274e-05	1.16873e-05	chp/salm/bchs/S/ush/Nup154/RasGAP1/stan/Lam/gl/eyg/caz/Vsx2/Afti/fred/dysc/tutl/Src64B/Src42A/CadN2/msk/sw/shtd/rno/sns/sca/LIMK1/Ns2/Cul3/PIG-V/X11L/Alk/kto/melt/dos/DCTN1-p150/hbs/CkIIalpha/NetB/Liprin-alpha/boss/ru/wg/Tak1/Arf79F/pelo/hop/cnk/Smyd4-4/Srrm1/so/Vsx1/Cdc42	53
GO:0150063	GO:0150063	visual system development	53/730	390/11257	1.96165e-07	1.45274e-05	1.16873e-05	chp/salm/bchs/S/ush/Nup154/RasGAP1/stan/Lam/gl/eyg/caz/Vsx2/Afti/fred/dysc/tutl/Src64B/Src42A/CadN2/msk/sw/shtd/rno/sns/sca/LIMK1/Ns2/Cul3/PIG-V/X11L/Alk/kto/melt/dos/DCTN1-p150/hbs/CkIIalpha/NetB/Liprin-alpha/boss/ru/wg/Tak1/Arf79F/pelo/hop/cnk/Smyd4-4/Srrm1/so/Vsx1/Cdc42	53
GO:0007423	GO:0007423	sensory organ development	60/730	475/11257	4.04528e-07	2.9126e-05	2.34319e-05	chp/salm/bchs/S/ush/Nup154/salr/Eb1/RasGAP1/Asx/stan/Lam/gl/eyg/caz/Vsx2/Afti/fred/dysc/tutl/Src64B/pad/Src42A/CadN2/msk/sw/shtd/rno/sns/sca/LIMK1/Ns2/Cul3/WASp/PIG-V/X11L/Alk/nvy/kto/melt/dos/DCTN1-p150/Arp3/hbs/CkIIalpha/NetB/Liprin-alpha/boss/ru/wg/Tak1/Arf79F/pelo/hop/cnk/Smyd4-4/Srrm1/so/Vsx1/Cdc42	60
GO:1904396	GO:1904396	regulation of neuromuscular junction development	24/730	118/11257	4.32136e-07	3.02729e-05	2.43545e-05	Synd/RhoGAP68F/caz/stj/dysc/nwk/Tbce/DIP-gamma/Src64B/Src42A/ringer/Akt1/Sec8/Octbeta1R/metro/WASp/Arp3/dpr11/htl/Fak/Tor/Ube3a/Pi4KIIIalpha/Cdc42	24
GO:0007156	GO:0007156	homophilic cell adhesion via plasma membrane adhesion molecules	14/730	45/11257	5.19801e-07	3.54011e-05	2.84801e-05	chp/CG44153/stan/Dscam3/Dscam4/tutl/Con/CadN2/Dscam2/sns/CG7166/Cad87A/hbs/kug	14
GO:0050803	GO:0050803	regulation of synapse structure or activity	32/730	190/11257	5.32655e-07	3.54011e-05	2.84801e-05	Synd/bchs/Nlg2/stan/RhoGAP68F/caz/mys/stj/dysc/nwk/Tbce/Lrrk/DIP-gamma/Src64B/Src42A/ringer/Akt1/Sec8/KaiR1D/Octbeta1R/metro/WASp/Yif1/Arp3/dpr11/Tsc1/htl/Fak/Tor/Ube3a/Pi4KIIIalpha/Cdc42	32
GO:0048638	GO:0048638	regulation of developmental growth	36/730	229/11257	5.9943e-07	3.8843e-05	3.12492e-05	Synd/bchs/stan/RhoGAP68F/caz/stj/dysc/nwk/Tbce/btsz/Src64B/Hr4/Src42A/lig/ringer/Akt1/Sec8/Octbeta1R/metro/WASp/pcm/Arp3/ago/Tsc1/Liprin-alpha/htl/kuz/Orct2/trbl/wg/Fak/Sema2a/Tor/Ube3a/Pi4KIIIalpha/Cdc42	36
GO:0051960	GO:0051960	regulation of nervous system development	49/730	369/11257	1.14406e-06	7.2327e-05	5.81871e-05	RIOK1/Synd/mor/RasGAP1/stan/Dhc64C/RhoGAP68F/caz/mys/stj/dysc/nwk/Tbce/Lrrk/tutl/E(z)/Src64B/Src42A/ringer/Akt1/Sec8/Octbeta1R/LIMK1/cwo/metro/WASp/Alk/IntS1/DCTN1-p150/Elp3/RhoGEF2/Arp3/ago/Archease/mop/NetB/Liprin-alpha/htl/kuz/CG13001/lva/bsk/Arf79F/Fak/Sema2a/Tor/Ube3a/Pi4KIIIalpha/Cdc42	49
GO:0048749	GO:0048749	compound eye development	49/730	371/11257	1.34135e-06	7.91728e-05	6.36945e-05	chp/salm/bchs/S/ush/RasGAP1/stan/Lam/gl/eyg/caz/Afti/fred/dysc/tutl/Src64B/Src42A/CadN2/msk/shtd/rno/sns/sca/LIMK1/Ns2/Cul3/PIG-V/X11L/Alk/kto/melt/dos/DCTN1-p150/hbs/CkIIalpha/NetB/Liprin-alpha/boss/ru/wg/Tak1/Arf79F/pelo/hop/cnk/Smyd4-4/Srrm1/so/Cdc42	49
GO:0007268	GO:0007268	chemical synaptic transmission	41/730	287/11257	1.34398e-06	7.91728e-05	6.36945e-05	Exo70/Synd/Arc1/Nlg2/Arl2/stj/dysc/nAChRbeta2/nwk/Tbce/Frq2/Src64B/gammaSnap1/mGluR/nonC/nAChRbeta1/nAChRalpha5/Src42A/Akt1/Sec8/KaiR1D/nAChRalpha6/Syx18/TkR99D/Nlg3/stac/X11L/Alk/Dop1R1/Nlg4/DCTN1-p150/stmA/GluClalpha/Ih/mAChR-B/nAChRalpha7/Gdi/Arf79F/nAChRalpha1/Cdc42/Lcch3	41
GO:0098916	GO:0098916	anterograde trans-synaptic signaling	41/730	287/11257	1.34398e-06	7.91728e-05	6.36945e-05	Exo70/Synd/Arc1/Nlg2/Arl2/stj/dysc/nAChRbeta2/nwk/Tbce/Frq2/Src64B/gammaSnap1/mGluR/nonC/nAChRbeta1/nAChRalpha5/Src42A/Akt1/Sec8/KaiR1D/nAChRalpha6/Syx18/TkR99D/Nlg3/stac/X11L/Alk/Dop1R1/Nlg4/DCTN1-p150/stmA/GluClalpha/Ih/mAChR-B/nAChRalpha7/Gdi/Arf79F/nAChRalpha1/Cdc42/Lcch3	41
GO:0099536	GO:0099536	synaptic signaling	42/730	298/11257	1.43304e-06	8.2543e-05	6.64058e-05	Exo70/Synd/Arc1/Nlg2/Arl2/stj/dysc/nAChRbeta2/nwk/Tbce/Frq2/Src64B/gammaSnap1/mGluR/nonC/nAChRbeta1/nAChRalpha5/Src42A/Akt1/Sec8/KaiR1D/nAChRalpha6/Syx18/TkR99D/Nlg3/stac/X11L/Alk/Dop1R1/Nlg4/DCTN1-p150/stmA/GluClalpha/Ih/mAChR-B/CG31642/nAChRalpha7/Gdi/Arf79F/nAChRalpha1/Cdc42/Lcch3	42
GO:0099537	GO:0099537	trans-synaptic signaling	41/730	288/11257	1.47241e-06	8.29669e-05	6.67468e-05	Exo70/Synd/Arc1/Nlg2/Arl2/stj/dysc/nAChRbeta2/nwk/Tbce/Frq2/Src64B/gammaSnap1/mGluR/nonC/nAChRbeta1/nAChRalpha5/Src42A/Akt1/Sec8/KaiR1D/nAChRalpha6/Syx18/TkR99D/Nlg3/stac/X11L/Alk/Dop1R1/Nlg4/DCTN1-p150/stmA/GluClalpha/Ih/mAChR-B/nAChRalpha7/Gdi/Arf79F/nAChRalpha1/Cdc42/Lcch3	41
GO:0007157	GO:0007157	heterophilic cell-cell adhesion via plasma membrane cell adhesion molecules	10/730	25/11257	1.65544e-06	9.12955e-05	7.34472e-05	beat-VI/beat-IIIb/mys/beat-IIa/sns/beat-IV/hbs/beat-Ib/beat-Ic/beat-IIb	10
GO:0040008	GO:0040008	regulation of growth	42/730	301/11257	1.86885e-06	0.000100918	8.11884e-05	Synd/mahj/bchs/stan/RhoGAP68F/caz/stj/dysc/nwk/Tbce/btsz/dco/Src64B/Hr4/Src42A/lig/ringer/Akt1/Sec8/Octbeta1R/metro/WASp/Alk/pcm/Mnt/Arp3/ago/Tsc1/mop/Liprin-alpha/htl/kuz/Orct2/srl/trbl/wg/Fak/Sema2a/Tor/Ube3a/Pi4KIIIalpha/Cdc42	42
GO:0051963	GO:0051963	regulation of synapse assembly	23/730	119/11257	1.91084e-06	0.00010108	8.13184e-05	Synd/stan/RhoGAP68F/caz/stj/dysc/nwk/Tbce/Src64B/Src42A/ringer/Akt1/Sec8/Octbeta1R/metro/WASp/Arp3/htl/Fak/Tor/Ube3a/Pi4KIIIalpha/Cdc42	23
GO:0008582	GO:0008582	regulation of synaptic growth at neuromuscular junction	22/730	112/11257	2.4054e-06	0.000124696	0.000100318	Synd/RhoGAP68F/caz/stj/dysc/nwk/Tbce/Src64B/Src42A/ringer/Akt1/Sec8/Octbeta1R/metro/WASp/Arp3/htl/Fak/Tor/Ube3a/Pi4KIIIalpha/Cdc42	22
GO:0042274	GO:0042274	ribosomal small subunit biogenesis	16/730	65/11257	2.68064e-06	0.00013624	0.000109605	RIOK1/l(2)k09022/CG12325/CG2260/Tsr1/l(3)07882/Surf6/CG7728/l(1)G0020/mbm/CG8064/CG3735/CG11030/CG9107/CG3071/CG7275	16
GO:1901888	GO:1901888	regulation of cell junction assembly	23/730	124/11257	3.98733e-06	0.000198753	0.000159897	Synd/stan/RhoGAP68F/caz/stj/dysc/nwk/Tbce/Src64B/Src42A/ringer/Akt1/Sec8/Octbeta1R/metro/WASp/Arp3/htl/Fak/Tor/Ube3a/Pi4KIIIalpha/Cdc42	23
GO:0007623	GO:0007623	circadian rhythm	26/730	152/11257	4.58597e-06	0.00022428	0.000180433	S/rho-5/Rnb/gl/Ac3/unc79/dysc/unc80/ctrip/dco/Pka-R2/Akt1/Oga/cwo/Cul3/nvy/CkIIalpha/Akap200/Ih/na/Rh7/hop/Ube3a/Srrm1/so/bgm	26
GO:0048511	GO:0048511	rhythmic process	26/730	153/11257	5.19288e-06	0.000249258	0.000200528	S/rho-5/Rnb/gl/Ac3/unc79/dysc/unc80/ctrip/dco/Pka-R2/Akt1/Oga/cwo/Cul3/nvy/CkIIalpha/Akap200/Ih/na/Rh7/hop/Ube3a/Srrm1/so/bgm	26
GO:0007267	GO:0007267	cell-cell signaling	57/730	480/11257	5.67165e-06	0.000267289	0.000215034	Wnk/Exo70/Synd/Arc1/Nlg2/Sin3A/Arl2/hyd/Bili/stj/dysc/nAChRbeta2/nwk/Tbce/bai/dco/Frq2/Src64B/gammaSnap1/lgs/mGluR/nonC/nAChRbeta1/nAChRalpha5/Src42A/Akt1/Sec8/KaiR1D/nAChRalpha6/Syx18/TkR99D/Nlg3/Glut1/stac/X11L/Alk/Dop1R1/kto/Nlg4/DCTN1-p150/stmA/CkIIalpha/GluClalpha/mop/Ih/mAChR-B/CG31642/nAChRalpha7/Gdi/wg/TER94/Snx3/Arf79F/nAChRalpha1/otk/Cdc42/Lcch3	57
GO:0030490	GO:0030490	maturation of SSU-rRNA	13/730	47/11257	5.78221e-06	0.000267634	0.000215311	RIOK1/l(2)k09022/CG12325/CG2260/Tsr1/l(3)07882/CG7728/l(1)G0020/CG8064/CG3735/CG11030/CG3071/CG7275	13
GO:0051236	GO:0051236	establishment of RNA localization	20/730	104/11257	9.59349e-06	0.000436251	0.000350964	Arc1/Srp72/Mys45A/Nup154/thoc5/Dhc64C/Nup93-2/swm/Nup358/Hel25E/CG14712/egh/Mtor/Nup214/tsu/DCTN1-p150/Tom20/Nup98-96/thoc7/Dcr-1	20
GO:0044087	GO:0044087	regulation of cellular component biogenesis	43/730	334/11257	1.15077e-05	0.000514275	0.000413734	Ssrp/Synd/TBCD/stan/Lam/RhoGAP68F/Vps39/caz/Arl2/mys/stj/dysc/nwk/Tbce/Lrrk/dco/Src64B/Src42A/ringer/Akt1/Sec8/kra/Octbeta1R/metro/WASp/CG31715/Mtor/Cep97/pcm/tsu/Arp3/Nup98-96/htl/TER94/Arpc2/Fak/Mybbp1A/hop/Tor/Ube3a/Pi4KIIIalpha/kug/Cdc42	43
GO:1903321	GO:1903321	negative regulation of protein modification by small protein conjugation or removal	6/730	10/11257	1.22142e-05	0.000536598	0.000431693	Cand1/hyd/SCCRO4/ctrip/CG30496/Kdm2	6
GO:0032456	GO:0032456	endocytic recycling	10/730	32/11257	2.15526e-05	0.000931072	0.000749047	Vps53/RhoGAP68F/CG7956/Vps50/mop/CG18659/Snx3/Tor/CG8202/Vps52	10
GO:0050657	GO:0050657	nucleic acid transport	19/730	102/11257	2.5554e-05	0.00106832	0.000859465	Arc1/Srp72/Mys45A/Nup154/thoc5/Dhc64C/Nup93-2/swm/Nup358/Hel25E/CG14712/egh/Mtor/Nup214/DCTN1-p150/Tom20/Nup98-96/thoc7/Dcr-1	19
GO:0050658	GO:0050658	RNA transport	19/730	102/11257	2.5554e-05	0.00106832	0.000859465	Arc1/Srp72/Mys45A/Nup154/thoc5/Dhc64C/Nup93-2/swm/Nup358/Hel25E/CG14712/egh/Mtor/Nup214/DCTN1-p150/Tom20/Nup98-96/thoc7/Dcr-1	19
GO:0048592	GO:0048592	eye morphogenesis	40/730	316/11257	3.43715e-05	0.00139205	0.0011199	chp/salm/S/RasGAP1/stan/Lam/gl/eyg/Afti/fred/dysc/tutl/Src64B/Src42A/CadN2/msk/sw/rno/sns/sca/Ns2/Cul3/PIG-V/Alk/melt/dos/DCTN1-p150/hbs/Liprin-alpha/boss/ru/wg/Tak1/Arf79F/pelo/hop/cnk/Smyd4-4/so/Cdc42	40
GO:0090596	GO:0090596	sensory organ morphogenesis	40/730	316/11257	3.43715e-05	0.00139205	0.0011199	chp/salm/S/RasGAP1/stan/Lam/gl/eyg/Afti/fred/dysc/tutl/Src64B/Src42A/CadN2/msk/sw/rno/sns/sca/Ns2/Cul3/PIG-V/Alk/melt/dos/DCTN1-p150/hbs/Liprin-alpha/boss/ru/wg/Tak1/Arf79F/pelo/hop/cnk/Smyd4-4/so/Cdc42	40
GO:0001745	GO:0001745	compound eye morphogenesis	39/730	306/11257	3.68555e-05	0.00146968	0.00118236	chp/salm/S/RasGAP1/stan/Lam/gl/eyg/Afti/fred/dysc/tutl/Src64B/Src42A/CadN2/msk/rno/sns/sca/Ns2/Cul3/PIG-V/Alk/melt/dos/DCTN1-p150/hbs/Liprin-alpha/boss/ru/wg/Tak1/Arf79F/pelo/hop/cnk/Smyd4-4/so/Cdc42	39
GO:0001738	GO:0001738	morphogenesis of a polarized epithelium	19/730	106/11257	4.46278e-05	0.00175266	0.00141001	S/stan/Dhc64C/fwd/fred/btsz/dco/zip/CadN2/msk/sca/LIMK1/DCTN1-p150/hbs/Tak1/hop/otk/kug/Cdc42	19
GO:0051240	GO:0051240	positive regulation of multicellular organismal process	38/730	299/11257	4.92515e-05	0.00190537	0.00153287	RIOK1/Synd/bchs/Nup154/rho-5/RasGAP1/stan/Dhc64C/RhoGAP68F/caz/mys/btsz/Src64B/zip/Hr4/Src42A/Akt1/Sec8/TkR99D/IntS1/pcm/scny/DCTN1-p150/Arp3/Archease/mop/Ih/htl/kuz/CG13001/Orct2/lva/wg/bsk/vir/Arf79F/Tor/bgm	38
GO:0016318	GO:0016318	ommatidial rotation	9/730	29/11257	5.94864e-05	0.00226748	0.00182419	S/stan/CadN2/msk/sca/hbs/Tak1/hop/Cdc42	9
GO:0031123	GO:0031123	RNA 3'-end processing	16/730	82/11257	6.12409e-05	0.00230053	0.00185077	Nop60B/B52/Sym/cbc/defl/Rexo5/swm/Fib/Rrp6/IntS1/x16/CG9018/IntS11/Nbr/MTPAP/orb	16
GO:0015931	GO:0015931	nucleobase-containing compound transport	20/730	119/11257	7.3382e-05	0.00271723	0.00218601	Arc1/Srp72/Mys45A/Nup154/thoc5/Dhc64C/Nup93-2/swm/Nup358/Hel25E/CG14712/egh/Mtor/Nup214/DCTN1-p150/Tom20/Nup98-96/Rim2/thoc7/Dcr-1	20
GO:0032535	GO:0032535	regulation of cellular component size	26/730	178/11257	7.89112e-05	0.0028408	0.00228543	Ssrp/RasGAP1/stan/Lam/dop/nwk/Pvf3/btsz/dco/Src64B/Akt1/WASp/CG31715/Alk/Arp3/Tsc1/Liprin-alpha/Myt1/Nup98-96/kuz/trbl/Pex11/Arpc2/Sema2a/Tor/Cdc42	26
GO:0051493	GO:0051493	regulation of cytoskeleton organization	26/730	178/11257	7.89112e-05	0.0028408	0.00228543	Ssrp/TBCD/Eb1/Dhc64C/Lam/RhoGAP68F/Arl2/cnn/mys/nwk/Lrrk/dco/Src64B/stai/WASp/CG31715/Mtor/Cep97/jar/RhoGEF2/Arp3/Akap200/Nup98-96/mlt/Arpc2/Cdc42	26
GO:0090066	GO:0090066	regulation of anatomical structure size	32/730	241/11257	8.33438e-05	0.00295928	0.00238074	vari/Ssrp/cora/RasGAP1/stan/Lam/dop/nwk/Pvf3/btsz/dco/Src64B/zip/Akt1/WASp/pasi2/CG31715/Alk/Nrg/Arp3/Tsc1/bark/Liprin-alpha/Myt1/Nup98-96/kuz/trbl/Pex11/Arpc2/Sema2a/Tor/Cdc42	32
GO:0051168	GO:0051168	nuclear export	14/730	69/11257	0.000112447	0.00393868	0.00316867	Mys45A/Nup154/thoc5/RanGAP/Nup93-2/swm/Nup358/Hel25E/CG14712/Mtor/Nup214/Nup98-96/thoc7/Ranbp16	14
GO:0001736	GO:0001736	establishment of planar polarity	17/730	96/11257	0.000129719	0.00442409	0.00355918	S/stan/fwd/fred/btsz/dco/zip/CadN2/msk/sca/LIMK1/hbs/Tak1/hop/otk/kug/Cdc42	17
GO:0007164	GO:0007164	establishment of tissue polarity	17/730	96/11257	0.000129719	0.00442409	0.00355918	S/stan/fwd/fred/btsz/dco/zip/CadN2/msk/sca/LIMK1/hbs/Tak1/hop/otk/kug/Cdc42	17
GO:0007626	GO:0007626	locomotory behavior	26/730	184/11257	0.000137739	0.00455668	0.00366585	Tbh/wfs1/Nlg2/Eb1/Lam/acj6/Ac3/caz/unc79/dysc/unc80/mbm/tutl/dco/Pka-R2/Oga/Tmc/Cul3/Ms/Elp3/CkIIalpha/Ih/nAChRalpha7/na/hop/Sema2a	26
GO:0042273	GO:0042273	ribosomal large subunit biogenesis	13/730	62/11257	0.000138277	0.00455668	0.00366585	CG12499/Nle/CG5033/CG1785/CG6724/CG32075/l(2)k09848/Mys45A/CG9246/CG8939/Surf6/CG1463/CG8545	13
GO:0008038	GO:0008038	neuron recognition	19/730	115/11257	0.000139505	0.00455668	0.00366585	bchs/CG44153/stan/Dscam3/acj6/Dscam4/zfh1/Pvf3/tutl/Con/kra/Dscam2/sli/WASp/Arp3/NetB/robo3/beat-Ic/Sema2a	19
GO:0051130	GO:0051130	positive regulation of cellular component organization	38/730	314/11257	0.000140638	0.00455668	0.00366585	Ssrp/Synd/stan/Dhc64C/Lam/RhoGAP68F/caz/Arl2/mys/nwk/vih/dco/E(z)/Graf/ringer/Akt1/Ndf/Sec8/kra/WASp/Mtor/Yif1/scny/DCTN1-p150/Arp3/Archease/AP-2alpha/Nup98-96/htl/Atac2/mlt/lva/Arpc2/Arf79F/hop/Tor/kug/Cdc42	38
GO:0001754	GO:0001754	eye photoreceptor cell differentiation	27/730	195/11257	0.00014587	0.00466783	0.00375527	chp/salm/S/RasGAP1/stan/gl/Afti/dysc/tutl/Src64B/Src42A/CadN2/msk/sw/rno/PIG-V/Alk/melt/dos/DCTN1-p150/hbs/Liprin-alpha/boss/ru/hop/cnk/Smyd4-4	27
GO:0046530	GO:0046530	photoreceptor cell differentiation	29/730	217/11257	0.000158097	0.00499742	0.00402042	chp/salm/S/RasGAP1/stan/gl/cnn/Afti/dysc/tutl/Src64B/Src42A/CadN2/msk/sw/rno/PIG-V/Alk/melt/dos/DCTN1-p150/hbs/mop/Liprin-alpha/boss/ru/hop/cnk/Smyd4-4	29
GO:0000462	GO:0000462	maturation of SSU-rRNA from tricistronic rRNA transcript (SSU-rRNA, 5.8S rRNA, LSU-rRNA)	9/730	33/11257	0.000181191	0.00565838	0.00455217	l(2)k09022/CG12325/CG2260/Tsr1/CG7728/CG3735/CG11030/CG3071/CG7275	9
GO:0008037	GO:0008037	cell recognition	19/730	118/11257	0.000197613	0.00609777	0.00490565	bchs/CG44153/stan/Dscam3/acj6/Dscam4/zfh1/Pvf3/tutl/Con/kra/Dscam2/sli/WASp/Arp3/NetB/robo3/beat-Ic/Sema2a	19
GO:0007419	GO:0007419	ventral cord development	14/730	73/11257	0.000211262	0.00644226	0.0051828	pea/Surf6/Prp8/mys/Nup358/loco/mute/ago/mop/robo3/htl/kuz/Pcl/nolo	14
GO:0048488	GO:0048488	synaptic vesicle endocytosis	10/730	41/11257	0.000219919	0.00655207	0.00527114	Synd/Nlg2/Arl2/stj/Lrrk/Nlg3/Nlg4/stmA/AP-2alpha/Arf79F	10
GO:0140238	GO:0140238	presynaptic endocytosis	10/730	41/11257	0.000219919	0.00655207	0.00527114	Synd/Nlg2/Arl2/stj/Lrrk/Nlg3/Nlg4/stmA/AP-2alpha/Arf79F	10
GO:0032386	GO:0032386	regulation of intracellular transport	13/730	65/11257	0.000228239	0.00670767	0.00539632	Nup154/RhoGAP68F/RanGAP/CG7956/CG3337/swm/Nup358/Mtor/Rint1/Nup214/Fs(2)Ket/Nup98-96/Snx3	13
GO:0051962	GO:0051962	positive regulation of nervous system development	23/730	159/11257	0.000232164	0.00670767	0.00539632	RIOK1/Synd/RasGAP1/stan/Dhc64C/RhoGAP68F/caz/mys/Src64B/Src42A/Akt1/Sec8/IntS1/DCTN1-p150/Arp3/Archease/mop/htl/CG13001/lva/bsk/Arf79F/Tor	23
GO:0001751	GO:0001751	compound eye photoreceptor cell differentiation	26/730	190/11257	0.000232905	0.00670767	0.00539632	chp/salm/S/RasGAP1/stan/gl/Afti/dysc/tutl/Src64B/Src42A/CadN2/msk/rno/PIG-V/Alk/melt/dos/DCTN1-p150/hbs/Liprin-alpha/boss/ru/hop/cnk/Smyd4-4	26
GO:0045664	GO:0045664	regulation of neuron differentiation	26/730	191/11257	0.00025347	0.00717315	0.00577079	RasGAP1/stan/Dhc64C/Lrrk/tutl/Src64B/Src42A/Akt1/LIMK1/Alk/IntS1/DCTN1-p150/Elp3/RhoGEF2/Archease/mop/NetB/Liprin-alpha/kuz/CG13001/lva/bsk/Arf79F/Sema2a/Tor/Cdc42	26
GO:0048813	GO:0048813	dendrite morphogenesis	23/730	160/11257	0.000254967	0.00717315	0.00577079	TBCD/stan/Dhc64C/acj6/shn/Toll-6/Lrrk/tutl/sli/cwo/Cul3/RunxA/Nrg/scro/NetB/velo/lva/TER94/Dcr-1/Sema2a/Tor/Ube3a/Cdc42	23
GO:0061024	GO:0061024	membrane organization	30/730	234/11257	0.00025737	0.00717315	0.00577079	Synd/Topors/Nlg2/Rtnl1/Lam/Vps39/Vps8/nwk/NimC4/Slc25A46a/MAN1/Sec8/WASp/Nlg3/PIG-V/Rint1/Nlg4/sws/OXA1L/Arp3/Tom20/CG13784/nes/AP-2alpha/bsk/TER94/Arf79F/Sec31/pelo/Pi4KIIIalpha	30
GO:0006403	GO:0006403	RNA localization	25/730	181/11257	0.000263835	0.00727511	0.00585282	Arc1/Srp72/Mys45A/Nup154/thoc5/Dhc64C/CG1463/Nup93-2/swm/Nup358/Hel25E/Rrp6/CG14712/egh/Mtor/Nup214/tsu/DCTN1-p150/CkIIalpha/Tom20/Nup98-96/thoc7/TER94/Dcr-1/orb	25
GO:0016358	GO:0016358	dendrite development	24/730	171/11257	0.000272749	0.00744175	0.00598689	TBCD/stan/Dhc64C/acj6/shn/Toll-6/Lrrk/tutl/Akt1/sli/cwo/Cul3/RunxA/Nrg/scro/NetB/velo/lva/TER94/Dcr-1/Sema2a/Tor/Ube3a/Cdc42	24
GO:0007349	GO:0007349	cellularization	17/730	102/11257	0.000277213	0.00748474	0.00602147	Dhc64C/cnn/dop/Src64B/sw/Cul3/jar/DCTN1-p150/RhoGEF2/Sep2/nes/mlt/lva/TER94/Dcr-1/grp/Cdc42	17
GO:0016482	GO:0016482	cytosolic transport	12/730	58/11257	0.000283217	0.00756804	0.00608848	Vps53/Nup154/Msp300/Lrrk/Vps50/loco/jar/DCTN1-p150/CG13784/mop/Snx3/Vps52	12
GO:0022603	GO:0022603	regulation of anatomical structure morphogenesis	33/730	270/11257	0.000316716	0.00837683	0.00673916	RasGAP1/stan/Pax/fwd/mys/fred/shn/mspo/Lrrk/tutl/dco/Src64B/zip/Src42A/LIMK1/Cul3/WASp/DCTN1-p150/Elp3/RhoGEF2/NetB/Liprin-alpha/htl/kuz/lva/wg/Tak1/Arpc2/hop/Sema2a/Tor/zye/Cdc42	33
GO:0032273	GO:0032273	positive regulation of protein polymerization	10/730	43/11257	0.000334273	0.00875187	0.00704088	Ssrp/Lam/Arl2/nwk/dco/ringer/WASp/Arp3/Nup98-96/Arpc2	10
GO:0035011	GO:0035011	melanotic encapsulation of foreign target	8/730	29/11257	0.000380623	0.00986574	0.00793698	Eb1/Dhc64C/RhoGEF3/Als2/PPO2/DCTN1-p150/Nrg/Cdc42	8
GO:0051129	GO:0051129	negative regulation of cellular component organization	24/730	175/11257	0.000386801	0.00992662	0.00798596	TBCD/CG9246/RhoGAP68F/hyd/stj/nwk/Lrrk/ctrip/Src64B/Src42A/Akt1/pch2/Octbeta1R/JIL-1/WASp/CG31715/Mtor/Cep97/Brca2/trbl/Kdm2/Fak/Sema2a/Ube3a	24
GO:0006405	GO:0006405	RNA export from nucleus	12/730	60/11257	0.000394417	0.0100228	0.00806336	Mys45A/Nup154/thoc5/Nup93-2/swm/Nup358/Hel25E/CG14712/Mtor/Nup214/Nup98-96/thoc7	12
GO:0045595	GO:0045595	regulation of cell differentiation	46/730	426/11257	0.000426467	0.0106962	0.00860509	RIOK1/salm/mor/ush/Nup154/RasGAP1/stan/Dhc64C/Pax/mspo/zfh1/Lrrk/tutl/E(z)/Src64B/zip/Src42A/Akt1/enok/LIMK1/cwo/Alk/IntS1/tsu/DCTN1-p150/Elp3/RhoGEF2/ago/Tsc1/Archease/mop/NetB/Liprin-alpha/htl/kuz/CG13001/lva/wg/bsk/vir/Ptpa/TER94/Arf79F/Sema2a/Tor/Cdc42	46
GO:0045666	GO:0045666	positive regulation of neuron differentiation	15/730	87/11257	0.000429169	0.0106962	0.00860509	RasGAP1/stan/Dhc64C/Src64B/Src42A/Akt1/IntS1/DCTN1-p150/Archease/mop/CG13001/lva/bsk/Arf79F/Tor	15
GO:0048732	GO:0048732	gland development	25/730	187/11257	0.000436744	0.0107813	0.00867358	ush/gl/eyg/mys/shn/zfh1/btsz/Src64B/zip/Src42A/sli/kto/bel/Tsc1/NetB/Nup98-96/htl/kuz/MED24/wg/hop/Tor/so/kug/Adgf-A	25
GO:0000154	GO:0000154	rRNA modification	7/730	23/11257	0.000458883	0.011221	0.00902728	Nopp140/Nop60B/CG8939/l(1)G0020/Fib/CG7544/CG8545	7
GO:0060249	GO:0060249	anatomical structure homeostasis	23/730	167/11257	0.000477629	0.0115702	0.00930824	nbs/mre11/Vps15/ush/l(2)k09848/Ku80/mys/dysc/zfh1/zip/nonC/nAChRalpha6/JIL-1/Mtor/mute/Dop1R1/sws/Nap1/boss/tea/srl/TER94/bgm	23
GO:0002376	GO:0002376	immune system process	47/730	444/11257	0.000576453	0.0138349	0.0111302	Hml/Vps15/CG5033/mor/B52/ush/Tep4/Eb1/Dhc64C/Lam/casp/Sin3A/mys/zfh1/Pvf3/RhoGEF3/E(bx)/Src64B/Als2/RyR/Mtr4/Src42A/Akt1/PPO2/Rrp6/CYLD/scny/DCTN1-p150/Elp3/Nrg/Tsc1/mop/Nup98-96/htl/kuz/wg/bsk/Tak1/Pitslre/Arf79F/Sec31/hop/cnk/Tor/kug/Adgf-A/Cdc42	47
GO:0002252	GO:0002252	immune effector process	21/730	149/11257	0.000608832	0.0144779	0.0116475	Vps15/B52/ush/Eb1/Dhc64C/casp/RhoGEF3/Als2/Mtr4/PPO2/Rrp6/scny/DCTN1-p150/Nrg/mop/Nup98-96/Tak1/Pitslre/hop/cnk/Cdc42	21
GO:0008356	GO:0008356	asymmetric cell division	16/730	100/11257	0.000662559	0.0155501	0.0125101	TBCD/Dhc64C/Arl2/cnn/Su(var)3-9/loco/CSN3/WASp/Mtor/mgr/AP-2alpha/Myt1/Sara/pelo/Tor/Cdc42	16
GO:0016049	GO:0016049	cell growth	21/730	150/11257	0.000665919	0.0155501	0.0125101	Nup154/stan/dco/CadN2/Akt1/CG15019/Mnt/DCTN1-p150/RhoGEF2/Nrg/Tsc1/Liprin-alpha/htl/kuz/Orct2/srl/wg/bsk/Sema2a/Tor/Cdc42	21
GO:0007271	GO:0007271	synaptic transmission, cholinergic	6/730	18/11257	0.000688658	0.0157965	0.0127083	nAChRbeta2/nAChRbeta1/nAChRalpha6/mAChR-B/nAChRalpha7/nAChRalpha1	6
GO:0070593	GO:0070593	dendrite self-avoidance	6/730	18/11257	0.000688658	0.0157965	0.0127083	CG44153/stan/Dscam3/Dscam4/tutl/Dscam2	6
GO:0050767	GO:0050767	regulation of neurogenesis	32/730	271/11257	0.000710491	0.0160796	0.012936	RIOK1/mor/RasGAP1/stan/Dhc64C/Lrrk/tutl/E(z)/Src64B/Src42A/Akt1/LIMK1/cwo/Alk/IntS1/DCTN1-p150/Elp3/RhoGEF2/ago/Archease/mop/NetB/Liprin-alpha/htl/kuz/CG13001/lva/bsk/Arf79F/Sema2a/Tor/Cdc42	32
GO:0036465	GO:0036465	synaptic vesicle recycling	10/730	47/11257	0.000713407	0.0160796	0.012936	Synd/Nlg2/Arl2/stj/Lrrk/Nlg3/Nlg4/stmA/AP-2alpha/Arf79F	10
GO:0002520	GO:0002520	immune system development	16/730	101/11257	0.000741065	0.0164174	0.0132078	ush/mys/zfh1/Pvf3/E(bx)/Elp3/Tsc1/Nup98-96/htl/kuz/wg/Arf79F/hop/Tor/Adgf-A/Cdc42	16
GO:0048534	GO:0048534	hematopoietic or lymphoid organ development	16/730	101/11257	0.000741065	0.0164174	0.0132078	ush/mys/zfh1/Pvf3/E(bx)/Elp3/Tsc1/Nup98-96/htl/kuz/wg/Arf79F/hop/Tor/Adgf-A/Cdc42	16
GO:0051301	GO:0051301	cell division	32/730	273/11257	0.000805915	0.0177028	0.0142419	Synd/TBCD/Dhc64C/Lam/bol/Arl2/hyd/cnn/fwd/zfh1/dco/zip/Su(var)3-9/Sec8/loco/CSN3/WASp/Mtor/mgr/Rint1/jar/stmA/Sep2/AP-2alpha/Myt1/Arf79F/Sara/pelo/Dcr-1/Cap-G/Tor/Cdc42	32
GO:0042391	GO:0042391	regulation of membrane potential	14/730	83/11257	0.000828014	0.0178851	0.0143886	nAChRbeta2/NaCP60E/nAChRbeta1/nAChRalpha5/Task6/nAChRalpha6/para/Ca-alpha1T/GluClalpha/Ih/nAChRalpha7/nAChRalpha1/sei/Lcch3	14
GO:0048640	GO:0048640	negative regulation of developmental growth	14/730	83/11257	0.000828014	0.0178851	0.0143886	stj/nwk/Src64B/Src42A/lig/Akt1/Octbeta1R/WASp/ago/Tsc1/trbl/Fak/Sema2a/Ube3a	14
GO:0010948	GO:0010948	negative regulation of cell cycle process	12/730	65/11257	0.000842846	0.0180253	0.0145013	nbs/mre11/mor/B52/pch2/Mtor/Rint1/Cep97/Brca2/trbl/wg/grp	12
GO:0032271	GO:0032271	regulation of protein polymerization	13/730	74/11257	0.000848413	0.0180253	0.0145013	Ssrp/TBCD/Lam/Arl2/nwk/dco/ringer/WASp/CG31715/Arp3/Nup98-96/Arpc2/Cdc42	13
GO:0030534	GO:0030534	adult behavior	21/730	153/11257	0.000865858	0.0180992	0.0145608	Tbh/wfs1/S/Nlg2/Eb1/Lam/acj6/caz/mbm/tutl/dco/Pka-R2/mtt/kra/Ms/Bacc/Akap200/nAChRalpha7/geko/na/Sema2a	21
GO:0044089	GO:0044089	positive regulation of cellular component biogenesis	21/730	153/11257	0.000865858	0.0180992	0.0145608	Ssrp/Synd/Lam/RhoGAP68F/caz/Arl2/nwk/dco/ringer/Sec8/kra/WASp/Arp3/Nup98-96/htl/Arpc2/Mybbp1A/hop/Tor/kug/Cdc42	21
GO:0060560	GO:0060560	developmental growth involved in morphogenesis	16/730	103/11257	0.000922064	0.0191199	0.015382	vari/stan/mys/Toll-6/CadN2/CG15019/DCTN1-p150/RhoGEF2/Nrg/Liprin-alpha/kuz/wg/bsk/otk/Sema2a/Cdc42	16
GO:0061318	GO:0061318	renal filtration cell differentiation	5/730	13/11257	0.000939396	0.0191725	0.0154243	zfh1/sns/htl/kuz/wg	5
GO:0061319	GO:0061319	nephrocyte differentiation	5/730	13/11257	0.000939396	0.0191725	0.0154243	zfh1/sns/htl/kuz/wg	5
GO:0008283	GO:0008283	cell population proliferation	35/730	311/11257	0.000980919	0.0198636	0.0159803	RIOK1/CG5033/mor/TBCD/S/Nup154/pasha/Dhc64C/Lam/Sin3A/Arl2/cnn/E(z)/Src64B/RyR/Nup358/Src42A/Akt1/loco/CSN3/enok/Cul3/mgr/jar/ago/Tsc1/Myt1/htl/wg/Dcr-1/hop/Tor/Adgf-A/Vsx1/Cdc42	35
GO:1902903	GO:1902903	regulation of supramolecular fiber organization	17/730	114/11257	0.00103668	0.0208301	0.0167578	Ssrp/TBCD/Lam/RhoGAP68F/Arl2/mys/nwk/dco/Src64B/WASp/CG31715/RhoGEF2/Arp3/Nup98-96/mlt/Arpc2/Cdc42	17
GO:0033043	GO:0033043	regulation of organelle organization	45/730	433/11257	0.00109982	0.0219286	0.0176416	Ssrp/TBCD/Eb1/CG9246/Dhc64C/Lam/RhoGAP68F/Vps39/Arl2/hyd/cnn/mys/nwk/Lrrk/ctrip/vih/dco/E(z)/Src64B/stai/Ndf/shtd/pch2/JIL-1/WASp/CG31715/Mtor/Cep97/pcm/scny/jar/RhoGEF2/Arp3/ago/Akap200/Nup98-96/Atac2/Hira/Brca2/mlt/trbl/Kdm2/Arpc2/hop/Cdc42	45
GO:0006397	GO:0006397	mRNA processing	35/730	314/11257	0.00116244	0.0230003	0.0185037	pea/obe/Sf3b3/salm/CG5728/B52/CG3436/Sym/Prp31/CG44249/cbc/caz/Prp8/CG2926/Mtr4/swm/CG12320/Hel25E/Zn72D/Sf3b2/mod/CG2931/tsu/x16/CG9018/CG3225/CG9213/CG4291/vir/thoc7/CG3335/MTPAP/Srrm1/orb/CG31368	35
GO:0018105	GO:0018105	peptidyl-serine phosphorylation	10/730	50/11257	0.00118669	0.02327	0.0187207	dop/CG32944/Lrrk/dco/nonC/Akt1/JIL-1/Asator/CkIIalpha/CG8878	10
GO:0007424	GO:0007424	open tracheal system development	29/730	245/11257	0.00119403	0.02327	0.0187207	sr/vari/salm/cora/stan/Dhc64C/Lam/mys/btsz/Src64B/zip/Src42A/Akt1/sli/pasi2/stac/DCTN1-p150/RhoGEF2/Nrg/ago/Tsc1/bark/ru/wg/hop/cnk/Tor/kug/Cdc42	29
GO:0045886	GO:0045886	negative regulation of synaptic growth at neuromuscular junction	9/730	42/11257	0.00123903	0.0237893	0.0191385	stj/nwk/Src64B/Src42A/Akt1/Octbeta1R/WASp/Fak/Ube3a	9
GO:1904397	GO:1904397	negative regulation of neuromuscular junction development	9/730	42/11257	0.00123903	0.0237893	0.0191385	stj/nwk/Src64B/Src42A/Akt1/Octbeta1R/WASp/Fak/Ube3a	9
GO:0051495	GO:0051495	positive regulation of cytoskeleton organization	11/730	59/11257	0.00126141	0.0238143	0.0191586	Ssrp/Dhc64C/Lam/Arl2/nwk/dco/WASp/Arp3/Nup98-96/mlt/Arpc2	11
GO:0016197	GO:0016197	endosomal transport	17/730	116/11257	0.00126279	0.0238143	0.0191586	S/Vps53/RhoGAP68F/CG7956/Vps8/Lrrk/Vps50/Ist1/CG13784/mop/CG18659/AnxB9/Snx3/Sara/Tor/CG8202/Vps52	17
GO:1901698	GO:1901698	response to nitrogen compound	25/730	201/11257	0.00126789	0.0238143	0.0191586	nbs/jnj/Hr38/CG30054/CG7546/Hrd3/dco/Pka-R2/SMC5/Akt1/RabX4/CG1317/Dop1R1/melt/TyrR/Tsc1/mAChR-B/Brca2/dock/srl/trbl/Pp2A-29B/CG15814/cnk/Tor	25
GO:0023057	GO:0023057	negative regulation of signaling	38/730	352/11257	0.00132305	0.0246716	0.0198483	Nle/Nlg2/rho-5/RasGAP1/Dlg5/casp/Sin3A/Bili/pic/dysc/dco/E(bx)/Hr4/Graf/Src42A/MAN1/lig/Akt1/rno/CYLD/TkR99D/CG17019/Cul3/Spred/Alk/scny/Cul4/Tsc1/dock/srl/trbl/Pp2A-29B/TER94/Fak/otk/Ube3a/Samtor/cos	38
GO:0051094	GO:0051094	positive regulation of developmental process	33/730	293/11257	0.00133574	0.0247303	0.0198955	RIOK1/Synd/bchs/RasGAP1/stan/Dhc64C/RhoGAP68F/caz/mys/btsz/Src64B/zip/Hr4/Src42A/Akt1/Sec8/IntS1/pcm/scny/DCTN1-p150/Arp3/Archease/mop/htl/kuz/CG13001/Orct2/lva/wg/bsk/vir/Arf79F/Tor	33
GO:0022604	GO:0022604	regulation of cell morphogenesis	20/730	148/11257	0.00138208	0.0252598	0.0203215	stan/mys/Lrrk/tutl/LIMK1/WASp/DCTN1-p150/Elp3/RhoGEF2/NetB/Liprin-alpha/htl/kuz/lva/Arpc2/hop/Sema2a/Tor/zye/Cdc42	20
GO:0000463	GO:0000463	maturation of LSU-rRNA from tricistronic rRNA transcript (SSU-rRNA, 5.8S rRNA, LSU-rRNA)	5/730	14/11257	0.00138383	0.0252598	0.0203215	CG12499/CG5033/CG6724/CG8939/CG1463	5
GO:0045786	GO:0045786	negative regulation of cell cycle	16/730	107/11257	0.00139828	0.0253451	0.0203901	nbs/mre11/mor/B52/Rad9/pch2/CG9578/Mtor/Rint1/Cep97/Myt1/Brca2/trbl/wg/grp/Tor	16
GO:0045475	GO:0045475	locomotor rhythm	12/730	69/11257	0.00145435	0.0258941	0.0208318	Ac3/unc79/dysc/unc80/dco/Pka-R2/Oga/Cul3/CkIIalpha/Ih/na/hop	12
GO:0070507	GO:0070507	regulation of microtubule cytoskeleton organization	11/730	60/11257	0.00145604	0.0258941	0.0208318	TBCD/Eb1/Dhc64C/Lam/Arl2/cnn/Lrrk/stai/Mtor/Cep97/mlt	11
GO:0043628	GO:0043628	ncRNA 3'-end processing	8/730	35/11257	0.00147681	0.0258941	0.0208318	Nop60B/defl/Rexo5/Fib/Rrp6/IntS1/IntS11/Nbr	8
GO:0051964	GO:0051964	negative regulation of synapse assembly	9/730	43/11257	0.00147852	0.0258941	0.0208318	stj/nwk/Src64B/Src42A/Akt1/Octbeta1R/WASp/Fak/Ube3a	9
GO:1905809	GO:1905809	negative regulation of synapse organization	9/730	43/11257	0.00147852	0.0258941	0.0208318	stj/nwk/Src64B/Src42A/Akt1/Octbeta1R/WASp/Fak/Ube3a	9
GO:0060341	GO:0060341	regulation of cellular localization	21/730	160/11257	0.00154276	0.0266821	0.0214657	Nup154/Lam/RhoGAP68F/RanGAP/CG7956/CG3337/Lrrk/Frq2/RyR/swm/Nup358/Mtor/Rint1/Nup214/tsu/Akap200/Fs(2)Ket/Ih/Nup98-96/TER94/Snx3	21
GO:0060284	GO:0060284	regulation of cell development	38/730	355/11257	0.0015441	0.0266821	0.0214657	RIOK1/mor/Nup154/RasGAP1/stan/Dhc64C/Lrrk/tutl/E(z)/Src64B/zip/Src42A/Akt1/LIMK1/cwo/Alk/IntS1/tsu/DCTN1-p150/Elp3/RhoGEF2/ago/Archease/mop/NetB/Liprin-alpha/htl/kuz/CG13001/lva/wg/bsk/vir/TER94/Arf79F/Sema2a/Tor/Cdc42	38
GO:0023061	GO:0023061	signal release	19/730	139/11257	0.00157277	0.0269975	0.0217194	Exo70/Synd/Arl2/bai/dco/Frq2/gammaSnap1/Akt1/Sec8/Glut1/stac/X11L/DCTN1-p150/stmA/mop/Ih/Gdi/Snx3/Arf79F	19
GO:0097435	GO:0097435	supramolecular fiber organization	31/730	273/11257	0.00161987	0.027623	0.0222227	Ssrp/Pxn/TBCD/Nup154/Dhc64C/Lam/RhoGAP68F/Arl2/mys/nwk/Msp300/Tbce/btsz/dco/Src64B/stai/zip/Src42A/ringer/WASp/CG31715/jar/DCTN1-p150/RhoGEF2/Arp3/Nup98-96/mlt/Arpc2/zye/Pi4KIIIalpha/Cdc42	31
GO:0042051	GO:0042051	compound eye photoreceptor development	14/730	89/11257	0.00166748	0.027892	0.0224391	chp/stan/Afti/dysc/tutl/CadN2/msk/rno/PIG-V/Alk/DCTN1-p150/Liprin-alpha/boss/Smyd4-4	14
GO:0000470	GO:0000470	maturation of LSU-rRNA	7/730	28/11257	0.00166792	0.027892	0.0224391	CG12499/CG5033/CG6724/CG32075/CG8939/CG1463/CG8545	7
GO:0046822	GO:0046822	regulation of nucleocytoplasmic transport	7/730	28/11257	0.00166792	0.027892	0.0224391	Nup154/RanGAP/swm/Nup358/Nup214/Fs(2)Ket/Nup98-96	7
GO:0040012	GO:0040012	regulation of locomotion	17/730	119/11257	0.00167946	0.0279048	0.0224494	Tbh/stan/Sin3A/mys/Pvf3/zip/Akt1/sli/Elp3/NetB/Liprin-alpha/htl/kuz/bsk/vir/Sema2a/Tor	17
GO:0048512	GO:0048512	circadian behavior	16/730	109/11257	0.00170518	0.0281517	0.0226481	S/rho-5/Ac3/unc79/dysc/unc80/dco/Pka-R2/Oga/Cul3/CkIIalpha/Ih/na/Rh7/hop/bgm	16
GO:0007417	GO:0007417	central nervous system development	31/730	274/11257	0.0017171	0.0281691	0.022662	sr/pea/bchs/cora/Dmtn/stan/pasha/Dhc64C/Lam/Surf6/Prp8/cnn/mys/mbm/Src64B/Nup358/loco/enok/pasi2/mute/Nrg/ago/mop/robo3/htl/kuz/velo/wg/bsk/Pcl/nolo	31
GO:1901889	GO:1901889	negative regulation of cell junction assembly	9/730	44/11257	0.00175384	0.0284874	0.0229181	stj/nwk/Src64B/Src42A/Akt1/Octbeta1R/WASp/Fak/Ube3a	9
GO:0030855	GO:0030855	epithelial cell differentiation	41/730	394/11257	0.00175848	0.0284874	0.0229181	Ssrp/S/cora/Dlg5/Dhc64C/Pax/mys/pic/dop/Src64B/stai/zip/lig/Akt1/squ/Sec8/loco/kra/egh/LIMK1/WASp/jar/DCTN1-p150/RhoGEF2/Cul4/hbs/Tsc1/mop/Fs(2)Ket/AP-2alpha/CIAPIN1/kuz/wg/bsk/vir/hop/zye/cos/kug/orb/Cdc42	41
GO:0007051	GO:0007051	spindle organization	18/730	130/11257	0.0017844	0.0287277	0.0231114	Synd/Nup154/Eb1/Dhc64C/Lam/cnn/fwd/sw/Sec8/Mtor/mgr/jar/DCTN1-p150/mop/Pp2A-29B/Ptpa/pelo/grp	18
GO:0032940	GO:0032940	secretion by cell	27/730	229/11257	0.00183899	0.0293268	0.0235934	Exo70/Synd/GPHR/S/rho-5/Arl2/CG5021/bai/dco/Frq2/gammaSnap1/Akt1/Sec8/RabX4/Glut1/stac/X11L/Yif1/jar/DCTN1-p150/stmA/mop/Ih/ru/Gdi/Snx3/Arf79F	27
GO:0007622	GO:0007622	rhythmic behavior	16/730	110/11257	0.00187865	0.0293268	0.0235934	S/rho-5/Ac3/unc79/dysc/unc80/dco/Pka-R2/Oga/Cul3/CkIIalpha/Ih/na/Rh7/hop/bgm	16
GO:0042461	GO:0042461	photoreceptor cell development	16/730	110/11257	0.00187865	0.0293268	0.0235934	chp/stan/cnn/Afti/dysc/tutl/CadN2/msk/rno/PIG-V/Alk/dos/DCTN1-p150/Liprin-alpha/boss/Smyd4-4	16
GO:0045926	GO:0045926	negative regulation of growth	15/730	100/11257	0.00188758	0.0293268	0.0235934	stj/nwk/Src64B/Src42A/lig/Akt1/Octbeta1R/WASp/Mnt/ago/Tsc1/trbl/Fak/Sema2a/Ube3a	15
GO:0048639	GO:0048639	positive regulation of developmental growth	15/730	100/11257	0.00188758	0.0293268	0.0235934	Synd/bchs/stan/RhoGAP68F/caz/btsz/Hr4/Akt1/Sec8/pcm/Arp3/htl/Orct2/wg/Tor	15
GO:0018209	GO:0018209	peptidyl-serine modification	10/730	53/11257	0.0018895	0.0293268	0.0235934	dop/CG32944/Lrrk/dco/nonC/Akt1/JIL-1/Asator/CkIIalpha/CG8878	10
GO:0050770	GO:0050770	regulation of axonogenesis	11/730	62/11257	0.00191922	0.0296109	0.0238219	stan/LIMK1/DCTN1-p150/Elp3/RhoGEF2/NetB/Liprin-alpha/kuz/Sema2a/Tor/Cdc42	11
GO:0010243	GO:0010243	response to organonitrogen compound	24/730	196/11257	0.00194459	0.029626	0.0238341	nbs/jnj/Hr38/CG30054/CG7546/Hrd3/dco/Pka-R2/SMC5/Akt1/RabX4/CG1317/Dop1R1/melt/TyrR/Tsc1/Brca2/dock/srl/trbl/Pp2A-29B/CG15814/cnk/Tor	24
GO:0051049	GO:0051049	regulation of transport	32/730	288/11257	0.00195508	0.029626	0.0238341	Wnk/S/Nup154/rho-5/RhoGAP68F/RanGAP/Vps39/CG7956/CG3337/dysc/Lrrk/dco/Frq2/Graf/swm/Nup358/Akt1/RabX4/Mtor/Glut1/Rint1/Teh1/Nup214/jar/mop/Fs(2)Ket/Ih/AP-2alpha/Nup98-96/ru/Snx3/Arf79F	32
GO:0007522	GO:0007522	visceral muscle development	5/730	15/11257	0.00196592	0.029626	0.0238341	Msp300/sns/Alk/htl/wg	5
GO:0048137	GO:0048137	spermatocyte division	5/730	15/11257	0.00196592	0.029626	0.0238341	Lam/bol/fwd/Myt1/pelo	5
GO:0045165	GO:0045165	cell fate commitment	35/730	324/11257	0.0019964	0.0299114	0.0240637	salm/TBCD/S/RasGAP1/Asx/pasha/Dhc64C/gl/Arl2/cnn/Src64B/Src42A/msk/loco/egh/Cul3/WASp/mgr/melt/dos/jar/tsu/DCTN1-p150/CkIIalpha/mei-9/boss/ru/htl/kuz/wg/Ptpa/Sara/Dcr-1/cnk/Cdc42	35
GO:0050769	GO:0050769	positive regulation of neurogenesis	17/730	121/11257	0.00201715	0.0300487	0.0241741	RIOK1/RasGAP1/stan/Dhc64C/Src64B/Src42A/Akt1/IntS1/DCTN1-p150/Archease/mop/htl/CG13001/lva/bsk/Arf79F/Tor	17
GO:0042752	GO:0042752	regulation of circadian rhythm	14/730	91/11257	0.00207034	0.0306227	0.0246359	S/rho-5/Rnb/gl/ctrip/dco/cwo/Cul3/Ih/na/Rh7/Srrm1/so/bgm	14
GO:0060541	GO:0060541	respiratory system development	29/730	254/11257	0.00207932	0.0306227	0.0246359	sr/vari/salm/cora/stan/Dhc64C/Lam/mys/btsz/Src64B/zip/Src42A/Akt1/sli/pasi2/stac/DCTN1-p150/RhoGEF2/Nrg/ago/Tsc1/bark/ru/wg/hop/cnk/Tor/kug/Cdc42	29
GO:0030838	GO:0030838	positive regulation of actin filament polymerization	8/730	37/11257	0.00215965	0.0316261	0.0254432	Ssrp/Lam/nwk/dco/WASp/Arp3/Nup98-96/Arpc2	8
GO:1902905	GO:1902905	positive regulation of supramolecular fiber organization	10/730	54/11257	0.00218714	0.0317188	0.0255178	Ssrp/Lam/Arl2/nwk/dco/WASp/Arp3/Nup98-96/mlt/Arpc2	10
GO:0030036	GO:0030036	actin cytoskeleton organization	33/730	302/11257	0.0022014	0.0317188	0.0255178	Ssrp/cora/mon2/Mys45A/Nup154/Lam/RhoGAP68F/fwd/mys/nwk/Msp300/RhoGEF3/btsz/dco/Src64B/zip/Src42A/Sec8/loco/sns/LIMK1/WASp/CG31715/jar/RhoGEF2/Arp3/Akap200/Nup98-96/Arpc2/zye/Pi4KIIIalpha/kug/Cdc42	33
GO:1901700	GO:1901700	response to oxygen-containing compound	37/730	350/11257	0.0022027	0.0317188	0.0255178	Hr38/CG30054/Tbh/wfs1/S/Ku80/dco/E(bx)/Pka-R2/Hr4/Gyc88E/Akt1/kra/sca/RabX4/Dop1R1/kto/melt/bel/Bacc/Tsc1/Akap200/boss/Nup98-96/mAChR-B/Brca2/dock/srl/trbl/Pp2A-29B/geko/MED24/bsk/ND-SGDH/Tak1/cnk/Tor	37
GO:0006997	GO:0006997	nucleus organization	13/730	82/11257	0.0022437	0.0319542	0.0257071	Topors/Lam/hyd/Nlp/Nup93-2/Msp300/Nup358/MAN1/msk/jar/Nap1/Hira/pelo	13
GO:0110053	GO:0110053	regulation of actin filament organization	13/730	82/11257	0.0022437	0.0319542	0.0257071	Ssrp/Lam/RhoGAP68F/mys/nwk/dco/Src64B/WASp/CG31715/Arp3/Nup98-96/Arpc2/Cdc42	13
GO:0042462	GO:0042462	eye photoreceptor cell development	14/730	92/11257	0.00230014	0.0324248	0.0260858	chp/stan/Afti/dysc/tutl/CadN2/msk/rno/PIG-V/Alk/DCTN1-p150/Liprin-alpha/boss/Smyd4-4	14
GO:0009451	GO:0009451	RNA modification	15/730	102/11257	0.00230483	0.0324248	0.0260858	Nopp140/Nop60B/CG10189/CG8939/l(1)G0020/Fib/CG2911/CG7009/CG6550/Elp3/CG7544/CG8545/CG8078/vir/CG18048	15
GO:0010648	GO:0010648	negative regulation of cell communication	37/730	351/11257	0.00231427	0.0324248	0.0260858	Nle/Nlg2/rho-5/RasGAP1/Dlg5/casp/Sin3A/Bili/pic/dysc/dco/E(bx)/Hr4/Graf/Src42A/MAN1/lig/Akt1/rno/CYLD/TkR99D/CG17019/Cul3/Spred/Alk/scny/Cul4/Tsc1/dock/srl/trbl/Pp2A-29B/TER94/otk/Ube3a/Samtor/cos	37
GO:0016071	GO:0016071	mRNA metabolic process	41/730	400/11257	0.00232798	0.0324416	0.0260993	pea/obe/Sf3b3/salm/Nop60B/CG5728/B52/CG3436/Sym/Prp31/CG44249/cbc/bol/caz/Prp8/CG2926/Mtr4/nonC/swm/CG12320/Hel25E/Rrp6/Zn72D/Sf3b2/mod/pcm/CG2931/tsu/x16/CG9018/CG3225/CG9213/CG4291/vir/thoc7/pelo/CG3335/MTPAP/Srrm1/orb/CG31368	41
GO:0032886	GO:0032886	regulation of microtubule-based process	12/730	73/11257	0.00239279	0.0331664	0.0266824	TBCD/Eb1/Dhc64C/Lam/Arl2/cnn/Lrrk/stai/Mtor/Cep97/CG8031/mlt	12
GO:0045927	GO:0045927	positive regulation of growth	17/730	123/11257	0.00241001	0.0332274	0.0267314	Synd/bchs/stan/RhoGAP68F/caz/btsz/dco/Hr4/Akt1/Sec8/pcm/Arp3/htl/Orct2/srl/wg/Tor	17
GO:0035006	GO:0035006	melanization defense response	9/730	46/11257	0.00242701	0.0332847	0.0267775	Eb1/Dhc64C/RhoGEF3/Als2/PPO2/DCTN1-p150/Nrg/bsk/Cdc42	9
GO:0006913	GO:0006913	nucleocytoplasmic transport	16/730	113/11257	0.00248996	0.0334903	0.026943	Mys45A/Nup154/thoc5/RanGAP/Nup93-2/swm/Nup358/Hel25E/msk/CG14712/Mtor/Nup214/Fs(2)Ket/Nup98-96/thoc7/Ranbp16	16
GO:0032956	GO:0032956	regulation of actin cytoskeleton organization	16/730	113/11257	0.00248996	0.0334903	0.026943	Ssrp/Lam/RhoGAP68F/mys/nwk/dco/Src64B/WASp/CG31715/jar/RhoGEF2/Arp3/Akap200/Nup98-96/Arpc2/Cdc42	16
GO:0051169	GO:0051169	nuclear transport	16/730	113/11257	0.00248996	0.0334903	0.026943	Mys45A/Nup154/thoc5/RanGAP/Nup93-2/swm/Nup358/Hel25E/msk/CG14712/Mtor/Nup214/Fs(2)Ket/Nup98-96/thoc7/Ranbp16	16
GO:0007169	GO:0007169	transmembrane receptor protein tyrosine kinase signaling pathway	25/730	211/11257	0.00249459	0.0334903	0.026943	rho-5/RasGAP1/Pvf3/Src64B/Graf/Src42A/Akt1/rno/Cul3/Alk/melt/dos/Tsc1/mop/boss/htl/dock/srl/trbl/Pp2A-29B/bsk/cnk/Tor/Ddr/Cdc42	25
GO:0008344	GO:0008344	adult locomotory behavior	13/730	83/11257	0.00250661	0.0334903	0.026943	Tbh/wfs1/Nlg2/Eb1/Lam/acj6/caz/mbm/tutl/Ms/nAChRalpha7/na/Sema2a	13
GO:0031334	GO:0031334	positive regulation of protein-containing complex assembly	10/730	55/11257	0.00252136	0.0335147	0.0269625	Ssrp/Lam/Arl2/nwk/dco/ringer/WASp/Arp3/Nup98-96/Arpc2	10
GO:0010769	GO:0010769	regulation of cell morphogenesis involved in differentiation	14/730	93/11257	0.00255059	0.033645	0.0270674	stan/Lrrk/tutl/LIMK1/DCTN1-p150/Elp3/RhoGEF2/NetB/Liprin-alpha/kuz/lva/Sema2a/Tor/Cdc42	14
GO:0002064	GO:0002064	epithelial cell development	36/730	341/11257	0.00256913	0.033645	0.0270674	Ssrp/S/Dlg5/Dhc64C/Pax/mys/pic/dop/Src64B/stai/zip/lig/Akt1/squ/Sec8/loco/kra/egh/WASp/jar/RhoGEF2/Cul4/mop/Fs(2)Ket/AP-2alpha/CIAPIN1/kuz/wg/bsk/vir/hop/zye/cos/kug/orb/Cdc42	36
GO:0035010	GO:0035010	encapsulation of foreign target	8/730	38/11257	0.00258308	0.033645	0.0270674	Eb1/Dhc64C/RhoGEF3/Als2/PPO2/DCTN1-p150/Nrg/Cdc42	8
GO:1903320	GO:1903320	regulation of protein modification by small protein conjugation or removal	8/730	38/11257	0.00258308	0.033645	0.0270674	bchs/Cand1/CG9062/hyd/SCCRO4/ctrip/CG30496/Kdm2	8
GO:0006509	GO:0006509	membrane protein ectodomain proteolysis	4/730	10/11257	0.00268646	0.0341339	0.0274607	Tace/mmd/Psn/kuz	4
GO:0030588	GO:0030588	pseudocleavage	4/730	10/11257	0.00268646	0.0341339	0.0274607	Eb1/jar/RhoGEF2/Arp3	4
GO:0030589	GO:0030589	pseudocleavage involved in syncytial blastoderm formation	4/730	10/11257	0.00268646	0.0341339	0.0274607	Eb1/jar/RhoGEF2/Arp3	4
GO:0046824	GO:0046824	positive regulation of nucleocytoplasmic transport	4/730	10/11257	0.00268646	0.0341339	0.0274607	Nup154/swm/Nup358/Nup214	4
GO:0090136	GO:0090136	epithelial cell-cell adhesion	4/730	10/11257	0.00268646	0.0341339	0.0274607	Src64B/Src42A/egh/mop	4
GO:0031167	GO:0031167	rRNA methylation	5/730	16/11257	0.00270849	0.0342458	0.0275508	Nopp140/CG8939/Fib/CG7544/CG8545	5
GO:0014070	GO:0014070	response to organic cyclic compound	15/730	104/11257	0.00279582	0.0351768	0.0282997	nbs/jnj/CG30054/dco/E(bx)/Pka-R2/Hr4/SMC5/Dop1R1/kto/bel/Tsc1/Nup98-96/Brca2/MED24	15
GO:0007015	GO:0007015	actin filament organization	21/730	168/11257	0.0028249	0.0351768	0.0282997	Ssrp/Nup154/Lam/RhoGAP68F/mys/nwk/Msp300/btsz/dco/Src64B/Src42A/WASp/CG31715/jar/RhoGEF2/Arp3/Nup98-96/Arpc2/zye/Pi4KIIIalpha/Cdc42	21
GO:0000278	GO:0000278	mitotic cell cycle	48/730	492/11257	0.0028364	0.0351768	0.0282997	nbs/Synd/mre11/mor/Map205/TBCD/B52/CG3436/Rad9/Eb1/Asx/CG3530/Dhc64C/Lam/Sin3A/Arl2/cnn/CG32396/PpD3/vih/E(z)/zip/Rrp6/shtd/Mtor/mgr/Rint1/jar/bel/DCTN1-p150/stmA/ago/CkIIalpha/Sep2/Fs(2)Ket/AP-2alpha/Myt1/SA/Hira/trbl/lva/Ptpa/Pitslre/Arf79F/Dcr-1/grp/Cap-G/Tor	48
GO:0018193	GO:0018193	peptidyl-amino acid modification	40/730	392/11257	0.0028364	0.0351768	0.0282997	sr/Ntl/CG17075/TTLL5/TTLL12/CG9246/Stt3A/Gcn5/dop/CG3337/CG32944/Naa35/l(1)G0020/Lrrk/dco/Art7/E(z)/Src64B/CG32110/nonC/Su(var)3-9/Sgf29/Src42A/CG2911/Akt1/Ndf/Oga/enok/JIL-1/CG31278/Elp3/Asator/CkIIalpha/Atac2/CG8878/velo/NSD/Fak/hop/Ost48	40
GO:0032970	GO:0032970	regulation of actin filament-based process	16/730	115/11257	0.00298294	0.036818	0.02962	Ssrp/Lam/RhoGAP68F/mys/nwk/dco/Src64B/WASp/CG31715/jar/RhoGEF2/Arp3/Akap200/Nup98-96/Arpc2/Cdc42	16
GO:0140352	GO:0140352	export from cell	27/730	237/11257	0.00300539	0.0368246	0.0296254	Exo70/Synd/GPHR/S/rho-5/Arl2/CG5021/bai/dco/Frq2/gammaSnap1/Akt1/Sec8/RabX4/Glut1/stac/X11L/Yif1/jar/DCTN1-p150/stmA/mop/Ih/ru/Gdi/Snx3/Arf79F	27
GO:0000768	GO:0000768	syncytium formation by plasma membrane fusion	8/730	39/11257	0.00306872	0.0368246	0.0296254	Pax/mspo/zip/sns/WASp/Arp3/hbs/dock	8
GO:0006949	GO:0006949	syncytium formation	8/730	39/11257	0.00306872	0.0368246	0.0296254	Pax/mspo/zip/sns/WASp/Arp3/hbs/dock	8
GO:0007520	GO:0007520	myoblast fusion	8/730	39/11257	0.00306872	0.0368246	0.0296254	Pax/mspo/zip/sns/WASp/Arp3/hbs/dock	8
GO:0014902	GO:0014902	myotube differentiation	8/730	39/11257	0.00306872	0.0368246	0.0296254	Pax/mspo/zip/sns/WASp/Arp3/hbs/dock	8
GO:0140253	GO:0140253	cell-cell fusion	8/730	39/11257	0.00306872	0.0368246	0.0296254	Pax/mspo/zip/sns/WASp/Arp3/hbs/dock	8
GO:0042147	GO:0042147	retrograde transport, endosome to Golgi	7/730	31/11257	0.00312581	0.0373368	0.0300375	Vps53/Lrrk/Vps50/CG13784/mop/Snx3/Vps52	7
GO:0030707	GO:0030707	ovarian follicle cell development	33/730	309/11257	0.0031749	0.0377493	0.0303693	Ssrp/S/Dlg5/Dhc64C/Pax/mys/pic/dop/Src64B/stai/zip/lig/Akt1/squ/Sec8/loco/kra/egh/jar/Cul4/mop/Fs(2)Ket/AP-2alpha/CIAPIN1/kuz/wg/bsk/vir/hop/cos/kug/orb/Cdc42	33
GO:0010975	GO:0010975	regulation of neuron projection development	16/730	116/11257	0.00325816	0.0385623	0.0310234	stan/Lrrk/tutl/Akt1/LIMK1/DCTN1-p150/Elp3/RhoGEF2/Archease/NetB/Liprin-alpha/kuz/lva/Sema2a/Tor/Cdc42	16
GO:1990138	GO:1990138	neuron projection extension	10/730	57/11257	0.00331217	0.0390234	0.0313943	stan/CadN2/CG15019/DCTN1-p150/Nrg/Liprin-alpha/kuz/bsk/Sema2a/Cdc42	10
GO:0002066	GO:0002066	columnar/cuboidal epithelial cell development	33/730	310/11257	0.00334028	0.0391765	0.0315174	Ssrp/S/Dlg5/Dhc64C/Pax/mys/pic/dop/Src64B/stai/zip/lig/Akt1/squ/Sec8/loco/kra/egh/jar/Cul4/mop/Fs(2)Ket/AP-2alpha/CIAPIN1/kuz/wg/bsk/vir/hop/cos/kug/orb/Cdc42	33
GO:0051646	GO:0051646	mitochondrion localization	6/730	24/11257	0.00357475	0.0415505	0.0334274	Dhc64C/Msp300/Lrrk/jar/DCTN1-p150/Rim2	6
GO:0090175	GO:0090175	regulation of establishment of planar polarity	6/730	24/11257	0.00357475	0.0415505	0.0334274	stan/fwd/fred/dco/zip/Tak1	6
GO:0019935	GO:0019935	cyclic-nucleotide-mediated signaling	11/730	67/11257	0.00361548	0.0418362	0.0336572	Ac3/Cngl/CG42260/Pka-R2/Gyc88E/Octbeta1R/CG34357/Dop1R1/CG31183/TyrR/Octbeta3R	11
GO:0046903	GO:0046903	secretion	28/730	252/11257	0.00363585	0.041885	0.0336965	Exo70/Synd/GPHR/S/rho-5/Arl2/CG5021/trpl/bai/dco/Frq2/gammaSnap1/Akt1/Sec8/RabX4/Glut1/stac/X11L/Yif1/jar/DCTN1-p150/stmA/mop/Ih/ru/Gdi/Snx3/Arf79F	28
GO:0048588	GO:0048588	developmental cell growth	12/730	77/11257	0.0037748	0.0431778	0.0347366	Nup154/stan/CadN2/CG15019/DCTN1-p150/Nrg/Liprin-alpha/htl/kuz/bsk/Sema2a/Cdc42	12
GO:0072499	GO:0072499	photoreceptor cell axon guidance	7/730	32/11257	0.00378139	0.0431778	0.0347366	dysc/DIP-gamma/Elp3/Nrg/dpr11/NetB/otk	7
GO:0030097	GO:0030097	hemopoiesis	13/730	87/11257	0.0038226	0.0434569	0.0349611	ush/mys/Pvf3/E(bx)/Elp3/Nup98-96/htl/wg/Arf79F/hop/Tor/Adgf-A/Cdc42	13
GO:0002065	GO:0002065	columnar/cuboidal epithelial cell differentiation	34/730	325/11257	0.00385426	0.0436256	0.0350968	Ssrp/S/Dlg5/Dhc64C/Pax/mys/pic/dop/Src64B/stai/zip/lig/Akt1/squ/Sec8/loco/kra/egh/jar/Cul4/Tsc1/mop/Fs(2)Ket/AP-2alpha/CIAPIN1/kuz/wg/bsk/vir/hop/cos/kug/orb/Cdc42	34
GO:0008380	GO:0008380	RNA splicing	30/730	277/11257	0.0038989	0.0439389	0.0353488	pea/obe/Sf3b3/salm/CG5728/B52/CG3436/Prp31/CG44249/cbc/caz/Prp8/CG2926/Mtr4/CG12320/Hel25E/Zn72D/Sf3b2/mod/CG2931/tsu/x16/Archease/CG3225/CG9213/CG4291/vir/CG3335/Srrm1/CG31368	30
GO:0038083	GO:0038083	peptidyl-tyrosine autophosphorylation	4/730	11/11257	0.00400665	0.0449578	0.0361685	Src64B/Src42A/Fak/hop	4
GO:0007167	GO:0007167	enzyme linked receptor protein signaling pathway	30/730	278/11257	0.00410947	0.0459126	0.0369367	rho-5/RasGAP1/shn/Pvf3/Src64B/Graf/Src42A/MAN1/Akt1/rno/CG34357/Cul3/Alk/melt/dos/CG31183/Tsc1/mop/boss/htl/dock/srl/trbl/Pp2A-29B/bsk/cnk/Tor/Ube3a/Ddr/Cdc42	30
GO:0007548	GO:0007548	sex differentiation	14/730	98/11257	0.00416246	0.0463051	0.0372524	salm/salr/Lam/hyd/mys/Yp3/sli/robo3/htl/wg/bsk/otk/Tor/Srrm1	14
GO:0097305	GO:0097305	response to alcohol	16/730	119/11257	0.00421212	0.0466574	0.0375358	Tbh/S/Ku80/E(bx)/Pka-R2/Hr4/kra/sca/kto/bel/Bacc/Akap200/Nup98-96/Brca2/geko/MED24	16
GO:0007186	GO:0007186	G protein-coupled receptor signaling pathway	25/730	220/11257	0.00434824	0.0479602	0.0385839	CG30054/Tbh/AstC-R1/CG31760/stan/Dh44-R1/Ac3/mGluR/mtt/loco/TkR99D/Octbeta1R/Dgk/Octalpha2R/Dop1R1/Ms/TyrR/CG13579/AstC/boss/mAChR-B/Rh7/CG31140/Octbeta3R/CG34384	25
GO:0006582	GO:0006582	melanin metabolic process	9/730	50/11257	0.00437897	0.0480945	0.038692	Eb1/Dhc64C/RhoGEF3/Als2/PPO2/DCTN1-p150/Nrg/bsk/Cdc42	9
GO:0030029	GO:0030029	actin filament-based process	33/730	316/11257	0.00449479	0.0486688	0.039154	Ssrp/cora/mon2/Mys45A/Nup154/Lam/RhoGAP68F/fwd/mys/nwk/Msp300/RhoGEF3/btsz/dco/Src64B/zip/Src42A/Sec8/loco/sns/LIMK1/WASp/CG31715/jar/RhoGEF2/Arp3/Akap200/Nup98-96/Arpc2/zye/Pi4KIIIalpha/kug/Cdc42	33
GO:0000375	GO:0000375	RNA splicing, via transesterification reactions	28/730	256/11257	0.0045322	0.0486688	0.039154	pea/obe/Sf3b3/salm/CG5728/B52/CG3436/Prp31/CG44249/caz/Prp8/CG2926/Mtr4/CG12320/Hel25E/Zn72D/Sf3b2/mod/CG2931/tsu/x16/CG3225/CG9213/CG4291/vir/CG3335/Srrm1/CG31368	28
GO:0000377	GO:0000377	RNA splicing, via transesterification reactions with bulged adenosine as nucleophile	28/730	256/11257	0.0045322	0.0486688	0.039154	pea/obe/Sf3b3/salm/CG5728/B52/CG3436/Prp31/CG44249/caz/Prp8/CG2926/Mtr4/CG12320/Hel25E/Zn72D/Sf3b2/mod/CG2931/tsu/x16/CG3225/CG9213/CG4291/vir/CG3335/Srrm1/CG31368	28
GO:0000398	GO:0000398	mRNA splicing, via spliceosome	28/730	256/11257	0.0045322	0.0486688	0.039154	pea/obe/Sf3b3/salm/CG5728/B52/CG3436/Prp31/CG44249/caz/Prp8/CG2926/Mtr4/CG12320/Hel25E/Zn72D/Sf3b2/mod/CG2931/tsu/x16/CG3225/CG9213/CG4291/vir/CG3335/Srrm1/CG31368	28
GO:0050920	GO:0050920	regulation of chemotaxis	7/730	33/11257	0.0045363	0.0486688	0.039154	stan/sli/Elp3/NetB/Liprin-alpha/Sema2a/Tor	7
GO:0008064	GO:0008064	regulation of actin polymerization or depolymerization	11/730	69/11257	0.0045627	0.0486688	0.039154	Ssrp/Lam/nwk/dco/Src64B/WASp/CG31715/Arp3/Nup98-96/Arpc2/Cdc42	11
GO:0030832	GO:0030832	regulation of actin filament length	11/730	69/11257	0.0045627	0.0486688	0.039154	Ssrp/Lam/nwk/dco/Src64B/WASp/CG31715/Arp3/Nup98-96/Arpc2/Cdc42	11

## Sheet: 5h_DOWN
	ID	Description	GeneRatio	BgRatio	pvalue	p.adjust	qvalue	geneID	Count
GO:0035159	GO:0035159	regulation of tube length, open tracheal system	8/245	36/11257	8.02384e-07	0.0014475	0.00124158	vari/nrv2/ft/bark/fj/dpp/fz/grh	8
GO:0035150	GO:0035150	regulation of tube size	9/245	54/11257	2.14144e-06	0.00193157	0.00165679	vari/nrv2/ft/raw/bark/fj/dpp/fz/grh	9
GO:0040007	GO:0040007	growth	25/245	429/11257	7.00882e-06	0.00394819	0.00338654	vari/dysc/Sec8/ft/crb/unc-104/Synd/Dscam1/Mnt/wg/stai/caz/cic/Toll-6/Hcf/bchs/fj/stj/Cdk4/dpp/slif/dar1/fz/Itgbn/srl	25
GO:0040008	GO:0040008	regulation of growth	20/245	301/11257	9.13804e-06	0.00394819	0.00338654	dysc/Sec8/ft/crb/unc-104/Synd/Mnt/wg/caz/cic/Hcf/bchs/stj/Cdk4/dpp/slif/dar1/fz/Itgbn/srl	20
GO:0035151	GO:0035151	regulation of tube size, open tracheal system	8/245	50/11257	1.09429e-05	0.00394819	0.00338654	vari/nrv2/ft/bark/fj/dpp/fz/grh	8
GO:0007424	GO:0007424	open tracheal system development	17/245	245/11257	2.51296e-05	0.00700519	0.00600865	sr/Mkp3/vari/nrv2/ft/crb/Dhc64C/dpy/wg/bark/fj/Cdk4/dpp/fz/salm/ru/grh	17
GO:0035152	GO:0035152	regulation of tube architecture, open tracheal system	10/245	91/11257	2.7182e-05	0.00700519	0.00600865	Mkp3/vari/nrv2/ft/Dhc64C/bark/fj/dpp/fz/grh	10
GO:0060541	GO:0060541	respiratory system development	17/245	254/11257	3.97904e-05	0.00897273	0.0076963	sr/Mkp3/vari/nrv2/ft/crb/Dhc64C/dpy/wg/bark/fj/Cdk4/dpp/fz/salm/ru/grh	17
GO:0034330	GO:0034330	cell junction organization	21/245	366/11257	4.92323e-05	0.00986834	0.0084645	vari/dysc/Sec8/nrv2/crb/CrebB/unc-104/Synd/Mical/wg/jar/dpr6/stai/caz/dpr21/bchs/bark/stj/dpr13/dpr2/Itgbn	21
GO:0045927	GO:0045927	positive regulation of growth	11/245	123/11257	7.46737e-05	0.0134711	0.0115548	Sec8/Synd/wg/caz/Hcf/bchs/Cdk4/dpp/dar1/fz/srl	11
GO:0007447	GO:0007447	imaginal disc pattern formation	10/245	110/11257	0.000138257	0.0226742	0.0194486	ft/Nipped-A/crb/wg/inv/cic/Dl/Dll/dpp/ru	10
GO:0035220	GO:0035220	wing disc development	20/245	372/11257	0.000180602	0.0264707	0.0227051	Mkp3/ft/Nipped-A/Wnk/crb/dpy/wg/bowl/inv/RasGAP1/cic/CG30069/Dl/Dll/fj/dpp/fz/salm/Irk1/bbg	20
GO:0007626	GO:0007626	locomotory behavior	13/245	184/11257	0.000190753	0.0264707	0.0227051	dysc/CrebB/unc-104/Pka-R2/sim/caz/HEATR2/Eb1/Tmc/Tbh/Adar/Irk1/ITP	13
GO:0050954	GO:0050954	sensory perception of mechanical stimulus	8/245	76/11257	0.000236252	0.0304428	0.0261121	nrv2/Ir75a/Dscam1/CG9492/HEATR2/trpl/Eb1/salm	8
GO:0098657	GO:0098657	import into cell	6/245	43/11257	0.000310313	0.0360634	0.0309331	Ntl/nrv2/Wnk/slif/CG7255/Nox	6
GO:0007398	GO:0007398	ectoderm development	4/245	16/11257	0.000324233	0.0360634	0.0309331	sr/wg/sim/dpp	4
GO:0000904	GO:0000904	cell morphogenesis involved in differentiation	23/245	484/11257	0.000362286	0.0360634	0.0309331	dysc/Wnk/zye/crb/Dhc64C/unc-104/tyn/Dscam1/Mical/Pka-R2/sim/CdGAPr/Toll-6/Dl/sick/scro/dar1/Unc-115a/fz/CG6701/Acsl/Oli/grh	23
GO:0007605	GO:0007605	sensory perception of sound	7/245	62/11257	0.000376585	0.0360634	0.0309331	nrv2/Ir75a/CG9492/HEATR2/trpl/Eb1/salm	7
GO:0048589	GO:0048589	developmental growth	19/245	364/11257	0.000379875	0.0360634	0.0309331	vari/dysc/Sec8/ft/crb/unc-104/Synd/Dscam1/wg/stai/caz/Toll-6/bchs/fj/stj/dpp/dar1/fz/Itgbn	19
GO:0007156	GO:0007156	homophilic cell adhesion via plasma membrane adhesion molecules	6/245	45/11257	0.000399815	0.0360634	0.0309331	ft/Cad87A/Cad96Ca/fz/Cad86C/hbs	6
GO:0034329	GO:0034329	cell junction assembly	14/245	228/11257	0.000463573	0.0397173	0.0340673	vari/dysc/Sec8/nrv2/crb/unc-104/Synd/Mical/wg/stai/caz/bark/stj/Itgbn	14
GO:0048638	GO:0048638	regulation of developmental growth	14/245	229/11257	0.000484358	0.0397173	0.0340673	dysc/Sec8/ft/crb/unc-104/Synd/wg/caz/bchs/stj/dpp/dar1/fz/Itgbn	14

## Sheet: 8h_DOWN
	ID	Description	GeneRatio	BgRatio	pvalue	p.adjust	qvalue	geneID	Count
GO:0006812	GO:0006812	cation transport	31/398	374/11257	9.05493e-06	0.0191602	0.0168994	PsGEF/nrv2/Ca-alpha1D/Rgk2/MCU/CG42235/CG15279/stj/Cam/Ntl/ZnT77C/Prosap/MICU3/SPoCk/Capa/GluRIIC/ZnT41F/slif/trpl/List/CG13795/CG10731/Vha36-3/Sytbeta/Vmat/Gat/zyd/Irk2/TrpA1/Task7/ppk8	31
GO:0070838	GO:0070838	divalent metal ion transport	12/398	85/11257	4.11827e-05	0.0252534	0.0222736	Ca-alpha1D/Rgk2/MCU/stj/ZnT77C/MICU3/SPoCk/GluRIIC/ZnT41F/trpl/zyd/TrpA1	12
GO:0072511	GO:0072511	divalent inorganic cation transport	12/398	85/11257	4.11827e-05	0.0252534	0.0222736	Ca-alpha1D/Rgk2/MCU/stj/ZnT77C/MICU3/SPoCk/GluRIIC/ZnT41F/trpl/zyd/TrpA1	12
GO:0040007	GO:0040007	growth	32/398	429/11257	5.33402e-05	0.0252534	0.0222736	dysc/btl/ft/dar1/stj/btsz/Synd/Pdk1/rut/shg/FarO/crb/Sdr/stai/Prosap/gt/dpp/spin/slif/cic/Sec8/wnd/nvd/fz/dally/Toll-6/ex/Pak/Hcf/Sema2a/pasha/Shark	32
GO:0030001	GO:0030001	metal ion transport	22/398	247/11257	6.41238e-05	0.0252534	0.0222736	nrv2/Ca-alpha1D/Rgk2/MCU/CG42235/CG15279/stj/Ntl/ZnT77C/MICU3/SPoCk/GluRIIC/ZnT41F/trpl/List/CG13795/Gat/zyd/Irk2/TrpA1/Task7/ppk8	22
GO:0048589	GO:0048589	developmental growth	28/398	364/11257	9.29554e-05	0.0252534	0.0222736	dysc/btl/ft/dar1/stj/btsz/Synd/Pdk1/rut/shg/crb/Sdr/stai/Prosap/gt/dpp/spin/Sec8/wnd/nvd/fz/dally/Toll-6/ex/Pak/Sema2a/pasha/Shark	28
GO:0006816	GO:0006816	calcium ion transport	10/398	66/11257	9.78965e-05	0.0252534	0.0222736	Ca-alpha1D/Rgk2/MCU/stj/MICU3/SPoCk/GluRIIC/trpl/zyd/TrpA1	10
GO:0098655	GO:0098655	cation transmembrane transport	22/398	255/11257	0.000102847	0.0252534	0.0222736	nrv2/Ca-alpha1D/Rgk2/MCU/CG15279/Cam/Ntl/ZnT77C/Prosap/MICU3/SPoCk/ZnT41F/slif/trpl/List/CG13795/CG10731/Vha36-3/Gat/zyd/Task7/ppk8	22
GO:0034220	GO:0034220	ion transmembrane transport	27/398	348/11257	0.000107411	0.0252534	0.0222736	nrv2/Ca-alpha1D/Rgk2/dysc/MCU/CG15279/Cam/Ntl/ZnT77C/Prosap/MICU3/SPoCk/ZnT41F/slif/trpl/CG7888/List/CG13795/CG10731/Vha36-3/CG8785/Eaat1/CG12344/Gat/zyd/Task7/ppk8	27
GO:0040008	GO:0040008	regulation of growth	24/398	301/11257	0.000171286	0.0362441	0.0319673	dysc/btl/ft/dar1/stj/btsz/Synd/Pdk1/shg/FarO/crb/Sdr/gt/dpp/spin/slif/cic/Sec8/fz/dally/ex/Pak/Hcf/Sema2a	24

## Sheet: D15_DOWN
	ID	Description	GeneRatio	BgRatio	pvalue	p.adjust	qvalue	geneID	Count
GO:0042417	GO:0042417	dopamine metabolic process	1979-05-01	16/11257	6.15743e-08	4.58455e-05	3.89236e-05	ple/PPO2/PPO1/AANAT1/e	5
GO:0006584	GO:0006584	catecholamine metabolic process	1979-05-01	19/11257	1.61239e-07	4.58455e-05	3.89236e-05	ple/PPO2/PPO1/AANAT1/e	5
GO:0009712	GO:0009712	catechol-containing compound metabolic process	1979-05-01	19/11257	1.61239e-07	4.58455e-05	3.89236e-05	ple/PPO2/PPO1/AANAT1/e	5
GO:0071711	GO:0071711	basement membrane organization	1979-04-01	22/11257	1.49294e-05	0.00318369	0.00270301	Pxn/Col4a1/vkg/SPARC	4
GO:0032787	GO:0032787	monocarboxylic acid metabolic process	1979-08-01	183/11257	4.07965e-05	0.00662771	0.00562703	Gad1/Gabat/Pdhb/Gapdh2/CG9577/CG31075/e/CG8630	8
GO:0019752	GO:0019752	carboxylic acid metabolic process	1979-11-01	369/11257	4.94654e-05	0.00662771	0.00562703	ple/Gad1/Gabat/b/CG12338/Pdhb/Gapdh2/CG9577/CG31075/e/CG8630	11
GO:0043436	GO:0043436	oxoacid metabolic process	1979-11-01	381/11257	6.6057e-05	0.00662771	0.00562703	ple/Gad1/Gabat/b/CG12338/Pdhb/Gapdh2/CG9577/CG31075/e/CG8630	11
GO:0006082	GO:0006082	organic acid metabolic process	1979-11-01	383/11257	6.92425e-05	0.00662771	0.00562703	ple/Gad1/Gabat/b/CG12338/Pdhb/Gapdh2/CG9577/CG31075/e/CG8630	11
GO:0006937	GO:0006937	regulation of muscle contraction	1979-03-01	12/11257	6.9929e-05	0.00662771	0.00562703	Eaat1/Ms/Tk	3
GO:0022600	GO:0022600	digestive system process	1979-03-01	13/11257	9.04484e-05	0.00771525	0.00655037	Ms/Col4a1/Tk	3
GO:0018958	GO:0018958	phenol-containing compound metabolic process	1979-05-01	67/11257	0.000102954	0.00798364	0.00677824	ple/PPO2/PPO1/AANAT1/e	5
GO:0090257	GO:0090257	regulation of muscle system process	1979-03-01	14/11257	0.000114535	0.0081415	0.00691227	Eaat1/Ms/Tk	3
GO:0007586	GO:0007586	digestion	1979-03-01	15/11257	0.000142445	0.0093466	0.00793542	Ms/Col4a1/Tk	3
GO:0007626	GO:0007626	locomotory behavior	1979-07-01	184/11257	0.000298956	0.018215	0.0154648	ple/Gad1/Eaat1/Ms/Tk/Ktl/e	7
GO:0007218	GO:0007218	neuropeptide signaling pathway	1979-04-01	55/11257	0.000584034	0.0328386	0.0278805	Nplp2/Ms/Tk/AstC	4
GO:1901605	GO:1901605	alpha-amino acid metabolic process	1979-05-01	99/11257	0.000640298	0.0328386	0.0278805	ple/Gad1/Gabat/CG12338/e	5
GO:0055086	GO:0055086	nucleobase-containing small molecule metabolic process	1979-08-01	276/11257	0.000682339	0.0328386	0.0278805	FarO/Ugt49B1/b/Pdhb/Gapdh2/ATPsynE/Gycalpha99B/CG1635	8
GO:0030534	GO:0030534	adult behavior	1979-06-01	153/11257	0.000701878	0.0328386	0.0278805	ple/Eaat1/Ms/Tk/to/DopEcR	6
GO:0009308	GO:0009308	amine metabolic process	1979-03-01	26/11257	0.000769955	0.0328386	0.0278805	Gabat/AANAT1/e	3
GO:0044106	GO:0044106	cellular amine metabolic process	1979-03-01	26/11257	0.000769955	0.0328386	0.0278805	Gabat/AANAT1/e	3
GO:0006520	GO:0006520	cellular amino acid metabolic process	1979-06-01	158/11257	0.00083065	0.0337402	0.028646	ple/Gad1/Gabat/b/CG12338/e	6
GO:0007186	GO:0007186	G protein-coupled receptor signaling pathway	1979-07-01	220/11257	0.000870395	0.0337476	0.0286522	Nplp2/Ms/Tk/AstC/Octbeta1R/Gycalpha99B/DopEcR	7
GO:0006936	GO:0006936	muscle contraction	1979-03-01	28/11257	0.000960404	0.0356184	0.0302406	Eaat1/Ms/Tk	3
GO:0044057	GO:0044057	regulation of system process	1979-04-01	64/11257	0.00103736	0.0368696	0.0313029	Eaat1/Ms/Tk/AstC	4
GO:0030198	GO:0030198	extracellular matrix organization	1979-04-01	66/11257	0.00116431	0.0397262	0.0337282	Pxn/Col4a1/vkg/SPARC	4
GO:0009150	GO:0009150	purine ribonucleotide metabolic process	1979-06-01	172/11257	0.00128959	0.0423084	0.0359205	FarO/Pdhb/Gapdh2/ATPsynE/Gycalpha99B/CG1635	6
GO:0048546	GO:0048546	digestive tract morphogenesis	1979-04-01	70/11257	0.0014502	0.0458156	0.0388982	Col4a1/vkg/SPARC/trh	4
GO:0009611	GO:0009611	response to wounding	1979-05-01	121/11257	0.00157886	0.0480988	0.0408366	ple/Hml/PPO1/Cbp53E/Idgf6	5

## Sheet: D30_DOWN
	ID	Description	GeneRatio	BgRatio	pvalue	p.adjust	qvalue	geneID	Count
GO:0042391	GO:0042391	regulation of membrane potential	15/305	83/11257	5.10432e-09	9.13674e-06	7.91439e-06	nAChRbeta1/nAChRalpha7/Fife/para/Ca-alpha1T/shakB/GluClalpha/Eaat1/NaCP60E/Ih/VGlut/CG42594/Irk2/Ork1/Nmdar1	15
GO:0034220	GO:0034220	ion transmembrane transport	29/305	348/11257	7.07517e-08	4.53284e-05	3.92642e-05	ine/nAChRbeta1/nAChRalpha7/Nckx30C/para/Ca-alpha1T/Mpcp2/GluClalpha/CG12531/KCNQ/Eaat1/slif/OtopLc/NaCP60E/VGAT/VGlut/porin/CG1090/kcc/CG13743/ATPsyngamma/CG13248/CG42594/ATPsynB/Ork1/VhaM9.7-a/trpl/blw/CG9396	29
GO:0042417	GO:0042417	dopamine metabolic process	7/305	16/11257	9.28349e-08	4.53284e-05	3.92642e-05	PPO2/PPO1/AANAT1/Ddc/ple/e/olf413	7
GO:0007626	GO:0007626	locomotory behavior	20/305	184/11257	1.22721e-07	4.53284e-05	3.92642e-05	Gad1/unc80/unc79/nAChRalpha7/tutl/shakB/na/ebo/DCX-EMAP/Ktl/Eaat1/ple/Ms/e/Ih/Gpdh1/Ork1/Trim9/Ac3/HEATR2	20
GO:0007186	GO:0007186	G protein-coupled receptor signaling pathway	22/305	220/11257	1.26616e-07	4.53284e-05	3.92642e-05	Nplp3/Gycalpha99B/CG43795/GABA-B-R2/Nplp1/DopEcR/fz/Nplp2/Dop2R/Octbeta1R/Ms/Dop1R1/SPR/Gbeta5/Octbeta2R/CCHa2/CG7497/Ggamma30A/CrzR/Octalpha2R/sNPF/Ac3	22
GO:0006812	GO:0006812	cation transport	29/305	374/11257	3.29862e-07	8.52936e-05	7.38827e-05	ine/nAChRalpha7/Nckx30C/Vmat/CG5687/para/Ca-alpha1T/CG1358/KCNQ/slif/OtopLc/NaCP60E/Ih/CG32669/CG42260/CG1090/colt/ATPsyngamma/CG4928/CG42594/ATPsynB/Irk2/Cngl/CG3078/CG42235/Ork1/VhaM9.7-a/trpl/blw	29
GO:0006584	GO:0006584	catecholamine metabolic process	7/305	19/11257	3.81201e-07	8.52936e-05	7.38827e-05	PPO2/PPO1/AANAT1/Ddc/ple/e/olf413	7
GO:0009712	GO:0009712	catechol-containing compound metabolic process	7/305	19/11257	3.81201e-07	8.52936e-05	7.38827e-05	PPO2/PPO1/AANAT1/Ddc/ple/e/olf413	7
GO:0042330	GO:0042330	taxis	27/305	348/11257	8.47541e-07	0.000168567	0.000146015	trol/gt/Gycalpha99B/pdm3/peb/Ten-m/tutl/fz/dpr11/Ddc/dock/pros/ple/Dop1R1/Toll-7/CG34353/bdl/NetB/unc-5/beat-IIIb/beat-Ib/Nmdar1/Trim9/mys/CdGAPr/lap/Con	27
GO:0015672	GO:0015672	monovalent inorganic cation transport	20/305	212/11257	1.21513e-06	0.000217508	0.000188409	ine/Nckx30C/CG5687/para/KCNQ/OtopLc/NaCP60E/Ih/CG32669/CG1090/ATPsyngamma/CG4928/CG42594/ATPsynB/Irk2/CG3078/CG42235/Ork1/VhaM9.7-a/blw	20
GO:0030534	GO:0030534	adult behavior	16/305	153/11257	3.82451e-06	0.000622352	0.000539091	to/nAChRalpha7/DopEcR/tutl/shakB/na/ebo/DCX-EMAP/Eaat1/ple/Ms/Gpdh1/Nmdar1/CrzR/sNPF/HEATR2	16
GO:0019935	GO:0019935	cyclic-nucleotide-mediated signaling	10/305	67/11257	1.16171e-05	0.00173289	0.00150105	Nplp1/DopEcR/Dop2R/Octbeta1R/Dop1R1/CG42260/Octbeta2R/CG7497/Cngl/Ac3	10
GO:0008344	GO:0008344	adult locomotory behavior	11/305	83/11257	1.37056e-05	0.00181198	0.00156957	nAChRalpha7/tutl/shakB/na/ebo/DCX-EMAP/Eaat1/ple/Ms/Gpdh1/HEATR2	11
GO:0006865	GO:0006865	amino acid transport	9/305	55/11257	1.48593e-05	0.00181198	0.00156957	CG12531/Eaat1/slif/Ih/VGAT/VGlut/kcc/CG13743/CG13248	9
GO:0098742	GO:0098742	cell-cell adhesion via plasma-membrane adhesion molecules	10/305	69/11257	1.51842e-05	0.00181198	0.00156957	peb/tutl/fz/bdl/sdk/sns/beat-IIIb/beat-Ib/mys/Con	10
GO:0099536	GO:0099536	synaptic signaling	22/305	298/11257	1.98506e-05	0.00211102	0.0018286	nAChRbeta1/Cbp53E/GABA-B-R2/nAChRalpha7/Ten-m/Fife/GluClalpha/VAChT/PGRP-LC/Eaat1/Dop1R1/Ih/VGAT/VGlut/gammaSnap1/Dyb/shi/Nmdar1/Sec8/Vps45/lap/Nlg3	22
GO:0007188	GO:0007188	adenylate cyclase-modulating G protein-coupled receptor signaling pathway	9/305	57/11257	2.00488e-05	0.00211102	0.0018286	GABA-B-R2/DopEcR/Dop2R/Octbeta1R/Dop1R1/Octbeta2R/CG7497/Octalpha2R/Ac3	9
GO:0098656	GO:0098656	anion transmembrane transport	12/305	105/11257	2.58634e-05	0.00257197	0.00222788	Mpcp2/GluClalpha/CG12531/Eaat1/slif/VGAT/VGlut/porin/kcc/CG13743/CG13248/CG9396	12
GO:0007187	GO:0007187	G protein-coupled receptor signaling pathway, coupled to cyclic nucleotide second messenger	9/305	60/11257	3.06794e-05	0.00285144	0.00246997	GABA-B-R2/DopEcR/Dop2R/Octbeta1R/Dop1R1/Octbeta2R/CG7497/Octalpha2R/Ac3	9
GO:0003333	GO:0003333	amino acid transmembrane transport	8/305	47/11257	3.31933e-05	0.00285144	0.00246997	CG12531/Eaat1/slif/VGAT/VGlut/kcc/CG13743/CG13248	8
GO:0007268	GO:0007268	chemical synaptic transmission	21/305	287/11257	3.50457e-05	0.00285144	0.00246997	nAChRbeta1/Cbp53E/GABA-B-R2/nAChRalpha7/Ten-m/Fife/GluClalpha/VAChT/PGRP-LC/Eaat1/Dop1R1/Ih/VGAT/VGlut/gammaSnap1/shi/Nmdar1/Sec8/Vps45/lap/Nlg3	21
GO:0098916	GO:0098916	anterograde trans-synaptic signaling	21/305	287/11257	3.50457e-05	0.00285144	0.00246997	nAChRbeta1/Cbp53E/GABA-B-R2/nAChRalpha7/Ten-m/Fife/GluClalpha/VAChT/PGRP-LC/Eaat1/Dop1R1/Ih/VGAT/VGlut/gammaSnap1/shi/Nmdar1/Sec8/Vps45/lap/Nlg3	21
GO:0099537	GO:0099537	trans-synaptic signaling	21/305	288/11257	3.68868e-05	0.00287075	0.00248669	nAChRbeta1/Cbp53E/GABA-B-R2/nAChRalpha7/Ten-m/Fife/GluClalpha/VAChT/PGRP-LC/Eaat1/Dop1R1/Ih/VGAT/VGlut/gammaSnap1/shi/Nmdar1/Sec8/Vps45/lap/Nlg3	21
GO:1903825	GO:1903825	organic acid transmembrane transport	9/305	65/11257	5.89205e-05	0.0042187	0.00365431	CG12531/Eaat1/slif/VGAT/VGlut/kcc/CG13743/CG13248/CG9396	9
GO:1905039	GO:1905039	carboxylic acid transmembrane transport	9/305	65/11257	5.89205e-05	0.0042187	0.00365431	CG12531/Eaat1/slif/VGAT/VGlut/kcc/CG13743/CG13248/CG9396	9
GO:0009628	GO:0009628	response to abiotic stimulus	26/305	419/11257	7.11917e-05	0.00480494	0.00416212	Gad1/ine/Gycalpha99B/Inx7/GABA-B-R2/nAChRalpha7/tutl/para/shakB/Ddc/ple/Dop1R1/Ih/VGAT/CG34353/b/porin/kcc/Gpdh1/tko/CG7409/Tom40/Ggamma30A/Nmdar1/lap/trpl	26
GO:0007189	GO:0007189	adenylate cyclase-activating G protein-coupled receptor signaling pathway	7/305	39/11257	7.30339e-05	0.00480494	0.00416212	DopEcR/Dop2R/Octbeta1R/Dop1R1/Octbeta2R/CG7497/Ac3	7
GO:0018958	GO:0018958	phenol-containing compound metabolic process	9/305	67/11257	7.51611e-05	0.00480494	0.00416212	PPO2/PPO1/AANAT1/DCX-EMAP/Ddc/PGRP-LC/ple/e/olf413	9
GO:0042493	GO:0042493	response to drug	5/305	18/11257	9.05601e-05	0.00558974	0.00484192	trol/unc79/na/VAChT/Cyp18a1	5
GO:0071875	GO:0071875	adrenergic receptor signaling pathway	4/305	10/11257	9.75299e-05	0.00563157	0.00487815	DopEcR/Dop2R/Octbeta1R/Octbeta2R	4
GO:0071880	GO:0071880	adenylate cyclase-activating adrenergic receptor signaling pathway	4/305	10/11257	9.75299e-05	0.00563157	0.00487815	DopEcR/Dop2R/Octbeta1R/Octbeta2R	4
GO:0006935	GO:0006935	chemotaxis	20/305	291/11257	0.000127871	0.00715278	0.00619586	trol/gt/pdm3/peb/Ten-m/tutl/fz/dpr11/dock/pros/Toll-7/bdl/NetB/unc-5/beat-IIIb/beat-Ib/Trim9/mys/CdGAPr/Con	20
GO:0030001	GO:0030001	metal ion transport	18/305	247/11257	0.000133897	0.00726288	0.00629122	ine/Nckx30C/CG5687/para/Ca-alpha1T/CG1358/KCNQ/NaCP60E/Ih/CG32669/CG1090/CG4928/CG42594/Irk2/CG3078/CG42235/Ork1/trpl	18
GO:0009416	GO:0009416	response to light stimulus	13/305	144/11257	0.000143537	0.00755678	0.0065458	Gycalpha99B/Inx7/nAChRalpha7/shakB/Dop1R1/Ih/VGAT/b/porin/Ggamma30A/Nmdar1/lap/trpl	13
GO:0046189	GO:0046189	phenol-containing compound biosynthetic process	4/305	11/11257	0.000149998	0.00767135	0.00664504	Ddc/ple/e/olf413	4
GO:0098609	GO:0098609	cell-cell adhesion	12/305	127/11257	0.000167663	0.00833655	0.00722125	peb/Ten-m/tutl/fz/bdl/sdk/sns/beat-IIIb/beat-Ib/mys/Con/Nlg3	12
GO:0007411	GO:0007411	axon guidance	19/305	275/11257	0.000175911	0.0085103	0.00737176	trol/gt/pdm3/peb/Ten-m/tutl/fz/dpr11/dock/pros/Toll-7/bdl/NetB/unc-5/beat-IIIb/beat-Ib/Trim9/mys/CdGAPr	19
GO:0007156	GO:0007156	homophilic cell adhesion via plasma membrane adhesion molecules	7/305	45/11257	0.000187497	0.00883209	0.0076505	peb/tutl/fz/bdl/sdk/sns/Con	7
GO:0019932	GO:0019932	second-messenger-mediated signaling	11/305	111/11257	0.000205172	0.00941686	0.00815703	Nplp1/DopEcR/Dop2R/Octbeta1R/Dop1R1/CG42260/Octbeta2R/CG7497/Cngl/trpl/Ac3	11
GO:0006937	GO:0006937	regulation of muscle contraction	4/305	12/11257	0.000220212	0.00985447	0.0085361	Eaat1/Ms/CG4928/CG3078	4
GO:0099003	GO:0099003	vesicle-mediated transport in synapse	11/305	113/11257	0.000240266	0.0102399	0.00886996	GABA-B-R2/Vmat/Fife/VGAT/VGlut/gammaSnap1/shi/Sec8/Vps45/lap/Nlg3	11
GO:0099504	GO:0099504	synaptic vesicle cycle	11/305	113/11257	0.000240266	0.0102399	0.00886996	GABA-B-R2/Vmat/Fife/VGAT/VGlut/gammaSnap1/shi/Sec8/Vps45/lap/Nlg3	11
GO:0097485	GO:0097485	neuron projection guidance	19/305	283/11257	0.000254076	0.0105767	0.00916167	trol/gt/pdm3/peb/Ten-m/tutl/fz/dpr11/dock/pros/Toll-7/bdl/NetB/unc-5/beat-IIIb/beat-Ib/Trim9/mys/CdGAPr	19
GO:0019933	GO:0019933	cAMP-mediated signaling	7/305	49/11257	0.000323543	0.0131623	0.0114014	DopEcR/Dop2R/Octbeta1R/Dop1R1/Octbeta2R/CG7497/Ac3	7
GO:0046942	GO:0046942	carboxylic acid transport	10/305	100/11257	0.000368986	0.0146774	0.0127138	CG12531/Eaat1/slif/Ih/VGAT/VGlut/kcc/CG13743/CG13248/CG9396	10
GO:0007632	GO:0007632	visual behavior	5/305	24/11257	0.000393085	0.0152306	0.013193	nAChRalpha7/Dop1R1/Ih/VGAT/b	5
GO:0015849	GO:0015849	organic acid transport	10/305	101/11257	0.00039991	0.0152306	0.013193	CG12531/Eaat1/slif/Ih/VGAT/VGlut/kcc/CG13743/CG13248/CG9396	10
GO:0007638	GO:0007638	mechanosensory behavior	4/305	14/11257	0.000426598	0.0155839	0.013499	tutl/para/kcc/tko	4
GO:0090257	GO:0090257	regulation of muscle system process	4/305	14/11257	0.000426598	0.0155839	0.013499	Eaat1/Ms/CG4928/CG3078	4
GO:0061564	GO:0061564	axon development	21/305	348/11257	0.000514708	0.0184265	0.0159614	trol/gt/pdm3/peb/Ten-m/tutl/fz/sick/dpr11/dock/pros/Toll-7/bdl/NetB/unc-5/beat-IIIb/beat-Ib/Trim9/mys/CdGAPr/Con	21
GO:0050878	GO:0050878	regulation of body fluid levels	4/305	15/11257	0.000569383	0.0186552	0.0161595	PPO1/ine/Hml/trpl	4
GO:0009612	GO:0009612	response to mechanical stimulus	6/305	39/11257	0.000578089	0.0186552	0.0161595	Gad1/GABA-B-R2/tutl/para/kcc/tko	6
GO:1901615	GO:1901615	organic hydroxy compound metabolic process	13/305	166/11257	0.000578142	0.0186552	0.0161595	PPO2/PPO1/AANAT1/DCX-EMAP/Ddc/PGRP-LC/ple/e/olf413/Gpdh1/CG32026/scu/Gk1	13
GO:0009308	GO:0009308	amine metabolic process	5/305	26/11257	0.000581925	0.0186552	0.0161595	AANAT1/Ddc/e/Gabat/olf413	5
GO:0044106	GO:0044106	cellular amine metabolic process	5/305	26/11257	0.000581925	0.0186552	0.0161595	AANAT1/Ddc/e/Gabat/olf413	5
GO:0007155	GO:0007155	cell adhesion	15/305	210/11257	0.000593964	0.0186552	0.0161595	peb/Ten-m/tutl/fz/bdl/sdk/sns/beat-IIIb/18w/beat-Ib/tyn/plx/mys/Con/Nlg3	15
GO:0006813	GO:0006813	potassium ion transport	7/305	54/11257	0.000594287	0.0186552	0.0161595	KCNQ/Ih/CG4928/CG42594/Irk2/CG3078/Ork1	7
GO:0007267	GO:0007267	cell-cell signaling	26/305	480/11257	0.000604472	0.0186552	0.0161595	nAChRbeta1/Cbp53E/GABA-B-R2/nAChRalpha7/Ten-m/Fife/fz/GluClalpha/VAChT/PGRP-LC/Eaat1/CG14234/Dop1R1/Ih/VGAT/VGlut/Glut1/gammaSnap1/Dyb/shi/teq/Nmdar1/Sec8/Vps45/lap/Nlg3	26
GO:0006836	GO:0006836	neurotransmitter transport	11/305	126/11257	0.000615263	0.0186665	0.0161692	ine/GABA-B-R2/Vmat/Fife/CG43066/Ih/VGAT/VGlut/gammaSnap1/Sec8/Vps45	11
GO:0007218	GO:0007218	neuropeptide signaling pathway	7/305	55/11257	0.000665422	0.0198518	0.0171959	Nplp3/Nplp1/Nplp2/Ms/CCHa2/CrzR/sNPF	7
GO:0007622	GO:0007622	rhythmic behavior	10/305	110/11257	0.000788286	0.022947	0.0198771	AANAT1/unc80/to/unc79/na/e/Gabat/Ih/Ork1/Ac3	10
GO:0007409	GO:0007409	axonogenesis	20/305	335/11257	0.00079658	0.022947	0.0198771	trol/gt/pdm3/peb/Ten-m/tutl/fz/sick/dpr11/dock/pros/Toll-7/bdl/NetB/unc-5/beat-IIIb/beat-Ib/Trim9/mys/CdGAPr	20
GO:0009150	GO:0009150	purine ribonucleotide metabolic process	13/305	172/11257	0.000807633	0.022947	0.0198771	FarO/Gycalpha99B/Pde8/CG30427/CG1441/Dpck/ATPsyngamma/Aprt/ATPsynB/scu/Pdhb/blw/Ac3	13
GO:0006936	GO:0006936	muscle contraction	5/305	28/11257	0.000831724	0.0229597	0.0198881	KCNQ/Eaat1/Ms/CG4928/CG3078	5
GO:0022610	GO:0022610	biological adhesion	15/305	217/11257	0.000833734	0.0229597	0.0198881	peb/Ten-m/tutl/fz/bdl/sdk/sns/beat-IIIb/18w/beat-Ib/tyn/plx/mys/Con/Nlg3	15
GO:0019226	GO:0019226	transmission of nerve impulse	4/305	17/11257	0.000951149	0.0254113	0.0220117	ine/para/Ca-alpha1T/NaCP60E	4
GO:0035637	GO:0035637	multicellular organismal signaling	4/305	17/11257	0.000951149	0.0254113	0.0220117	ine/para/Ca-alpha1T/NaCP60E	4
GO:0034330	GO:0034330	cell junction organization	21/305	366/11257	0.000985421	0.0259398	0.0224694	Gad1/Ten-m/Fife/Aplip1/Lrp4/shakB/dpr11/pros/Octbeta1R/dpr12/Pi4KIIIalpha/Octbeta2R/sns/shi/dpr4/dpr5/mys/Sec8/jar/RtGEF/Nlg3	21
GO:0098660	GO:0098660	inorganic ion transmembrane transport	17/305	268/11257	0.00100803	0.0261505	0.0226519	ine/Nckx30C/para/Ca-alpha1T/Mpcp2/GluClalpha/KCNQ/OtopLc/NaCP60E/CG1090/ATPsyngamma/CG42594/ATPsynB/Ork1/VhaM9.7-a/trpl/blw	17
GO:0007613	GO:0007613	memory	10/305	118/11257	0.00135508	0.0346513	0.0300155	Inx7/Dop2R/ebo/Ddc/Dop1R1/Nmdar2/2mit/shi/teq/Nmdar1	10
GO:0009259	GO:0009259	ribonucleotide metabolic process	13/305	183/11257	0.00142785	0.0351648	0.0304603	FarO/Gycalpha99B/Pde8/CG30427/CG1441/Dpck/ATPsyngamma/Aprt/ATPsynB/scu/Pdhb/blw/Ac3	13
GO:0007611	GO:0007611	learning or memory	12/305	161/11257	0.00143409	0.0351648	0.0304603	Gad1/Inx7/DopEcR/Dop2R/ebo/Ddc/Dop1R1/Nmdar2/2mit/shi/teq/Nmdar1	12
GO:0050890	GO:0050890	cognition	12/305	161/11257	0.00143409	0.0351648	0.0304603	Gad1/Inx7/DopEcR/Dop2R/ebo/Ddc/Dop1R1/Nmdar2/2mit/shi/teq/Nmdar1	12
GO:0006163	GO:0006163	purine nucleotide metabolic process	13/305	184/11257	0.0014999	0.0362813	0.0314274	FarO/Gycalpha99B/Pde8/CG30427/CG1441/Dpck/ATPsyngamma/Aprt/ATPsynB/scu/Pdhb/blw/Ac3	13
GO:1903532	GO:1903532	positive regulation of secretion by cell	5/305	32/11257	0.00155985	0.0366511	0.0317478	ru/Fife/Glut1/teq/jar	5
GO:0009314	GO:0009314	response to radiation	13/305	185/11257	0.00157494	0.0366511	0.0317478	Gycalpha99B/Inx7/nAChRalpha7/shakB/Dop1R1/Ih/VGAT/b/porin/Ggamma30A/Nmdar1/lap/trpl	13
GO:0098655	GO:0098655	cation transmembrane transport	16/305	255/11257	0.00157661	0.0366511	0.0317478	ine/Nckx30C/para/Ca-alpha1T/KCNQ/slif/OtopLc/NaCP60E/CG1090/ATPsyngamma/CG42594/ATPsynB/Ork1/VhaM9.7-a/trpl/blw	16
GO:0019693	GO:0019693	ribose phosphate metabolic process	13/305	186/11257	0.00165308	0.0370477	0.0320913	FarO/Gycalpha99B/Pde8/CG30427/CG1441/Dpck/ATPsyngamma/Aprt/ATPsynB/scu/Pdhb/blw/Ac3	13
GO:0044057	GO:0044057	regulation of system process	7/305	64/11257	0.00165576	0.0370477	0.0320913	KCNQ/Eaat1/Ms/Dop1R1/CG4928/CG3078/Ork1	7
GO:0055074	GO:0055074	calcium ion homeostasis	7/305	64/11257	0.00165576	0.0370477	0.0320913	Cbp53E/Nckx30C/Dop1R1/CG1090/CG7497/Nmdar1/trpl	7
GO:0006576	GO:0006576	cellular biogenic amine metabolic process	4/305	20/11257	0.00181605	0.0401326	0.0347635	AANAT1/Ddc/e/olf413	4
GO:0008039	GO:0008039	synaptic target recognition	6/305	49/11257	0.0019756	0.0429232	0.0371807	hig/Ten-m/tutl/dpr12/NetB/Con	6
GO:0098662	GO:0098662	inorganic cation transmembrane transport	15/305	237/11257	0.0020122	0.0429232	0.0371807	ine/Nckx30C/para/Ca-alpha1T/KCNQ/OtopLc/NaCP60E/CG1090/ATPsyngamma/CG42594/ATPsynB/Ork1/VhaM9.7-a/trpl/blw	15
GO:0006570	GO:0006570	tyrosine metabolic process	3/305	10/11257	0.00205155	0.0429232	0.0371807	Ddc/ple/e	3
GO:0007212	GO:0007212	dopamine receptor signaling pathway	3/305	10/11257	0.00205155	0.0429232	0.0371807	Dop2R/Dop1R1/Gbeta5	3
GO:0051047	GO:0051047	positive regulation of secretion	5/305	34/11257	0.00206223	0.0429232	0.0371807	ru/Fife/Glut1/teq/jar	5

## Sheet: 5h_UP
	ID	Description	GeneRatio	BgRatio	pvalue	p.adjust	qvalue	geneID	Count
GO:0006412	GO:0006412	translation	46/553	423/11257	2.98446e-07	0.000534764	0.000511093	Thor/AsnRS/AspRS/eIF2beta/RpL4/Dgp-1/eEF1beta/TrpRS/eIF2Balpha/Pop2/mRpL28/CG2017/eIF2Bdelta/CG1578/ThrRS/Xbp1/eIF2D/GAPsec/mEFG1/Dph5/RpL28/RpL32/RpL8/RpL22/eIF6/RpL34a/sta/RpL35A/mRpS11/RpL14/RpL34b/eIF3g1/RpL6/RpL24/fs(1)K10/RpS15Aa/CG13928/eIF2Bepsilon/RpL19/RpLP0/eEF1alpha1/RpL23A/RpL7/HBS1/CG12848/RpS14a	46
GO:0002181	GO:0002181	cytoplasmic translation	22/553	133/11257	4.80255e-07	0.000534764	0.000511093	eIF2beta/RpL4/CG1578/eIF2D/Dph5/RpL28/RpL32/RpL8/RpL22/RpL34a/sta/RpL35A/RpL14/RpL34b/RpL6/RpL24/RpS15Aa/RpL19/RpLP0/RpL23A/RpL7/RpS14a	22
GO:0043043	GO:0043043	peptide biosynthetic process	48/553	470/11257	1.04554e-06	0.000776137	0.000741781	Thor/AsnRS/AspRS/eIF2beta/RpL4/Dgp-1/grass/eEF1beta/TrpRS/eIF2Balpha/Pop2/mRpL28/CG2017/Gclm/eIF2Bdelta/CG1578/ThrRS/Xbp1/eIF2D/GAPsec/mEFG1/Dph5/RpL28/RpL32/RpL8/RpL22/eIF6/RpL34a/sta/RpL35A/mRpS11/RpL14/RpL34b/eIF3g1/RpL6/RpL24/fs(1)K10/RpS15Aa/CG13928/eIF2Bepsilon/RpL19/RpLP0/eEF1alpha1/RpL23A/RpL7/HBS1/CG12848/RpS14a	48
GO:0006091	GO:0006091	generation of precursor metabolites and energy	27/553	220/11257	1.01646e-05	0.00565917	0.00540866	Cyt-c-p/Tspo/Atg3/ND-B14.5B/RFeSP/UQCR-C2/CG9410/COX7C/ND-B14/CPT2/Atg6/ND-ASHI/ND-23/fh/dj-1beta/Eno/Mdh2/Ald1/ND-75/UQCR-C1/Fdh/CG11257/ND-B18/PyK/CG7069/ND-51/Fum1	27
GO:0046034	GO:0046034	ATP metabolic process	20/553	155/11257	7.00387e-05	0.0311953	0.0298144	Cyt-c-p/Tspo/ND-B14.5B/RFeSP/UQCR-C2/COX7C/ND-B14/ND-ASHI/sun/ND-23/fh/dj-1beta/Eno/Ald1/ND-75/UQCR-C1/ND-B18/PyK/CG7069/ND-51	20
GO:0006414	GO:0006414	translational elongation	8/553	31/11257	9.3164e-05	0.0345794	0.0330487	Dgp-1/eEF1beta/CG2017/CG1578/GAPsec/mEFG1/Dph5/eEF1alpha1	8
GO:0006119	GO:0006119	oxidative phosphorylation	15/553	103/11257	0.000143693	0.0457149	0.0436914	Cyt-c-p/Tspo/ND-B14.5B/RFeSP/UQCR-C2/COX7C/ND-B14/ND-ASHI/ND-23/fh/dj-1beta/ND-75/UQCR-C1/ND-B18/ND-51	15

## Sheet: 8h_UP
	ID	Description	GeneRatio	BgRatio	pvalue	p.adjust	qvalue	geneID	Count
GO:0044087	GO:0044087	regulation of cellular component biogenesis	54/846	334/11257	5.48786e-08	0.000123273	0.000102238	IRSp53/Syn2/scb/Src64B/ena/Arp2/spict/wde/rictor/Ssrp/dia/Cp110/Arp3/Fas2/twf/Svil/nod/cpb/HSPC300/C1GalTA/Ank2/SAK/CG5815/beta-Spec/LamC/Cenp-C/Su(var)3-3/gbb/cpa/Cortactin/plum/TER94/GMF/Rae1/CG4078/Rpt4/spartin/Rpt6/SMSr/asl/mira/htt/Rcc1/Pex3/CG43658/Vps33B/Spt-I/Cdc42/Arpc1/Rab8/spn-F/Mob4/Usp5/Arpc5	54
GO:0006281	GO:0006281	DNA repair	37/846	193/11257	9.38869e-08	0.000123273	0.000102238	Ku80/Rrp1/tam/Mlh1/Xpac/Msh6/DNApol-epsilon255/RpII15/XRCC1/mre11/DNApol-iota/Pms2/spn-A/DNApol-eta/rad50/Rad9/okr/DNApol-delta/FANCI/Irbp18/DNApol-theta/CG6171/Snm1/Arp5/dpa/tefu/Rad23/CG4078/mei-9/p53/DNApol-zeta/Xpd/Top3alpha/mio/Mcm6/Tfb4/Fancd2	37
GO:0090066	GO:0090066	regulation of anatomical structure size	40/846	241/11257	1.50805e-06	0.000949525	0.000787497	IRSp53/Ncc69/Src64B/Arp2/spict/p38a/rictor/Ssrp/bark/dia/Arp3/Fas2/Gli/twf/pasi1/Svil/Actbeta/cpb/HSPC300/Wnt5/tnc/Ras85D/ttk/LamC/Sema1b/cpa/Cortactin/Lst8/GMF/CHORD/sinu/Best1/Mcr/Lac/MAPk-Ak2/Cdc42/mio/Arpc1/bif/Arpc5	40
GO:0043632	GO:0043632	modification-dependent macromolecule catabolic process	50/846	334/11257	1.84267e-06	0.000949525	0.000787497	Rpn8/Prosbeta6/Rpn13/Skp2/Prosalpha7/Der-1/Rpn2/CSN5/Prosbeta1/Prosalpha2/park/CSN4/CG7656/Prosalpha3/Prosalpha6/Vps37B/shrb/Rpn7/Cdc23/TER94/Prosalpha5/Rpn11/CG32581/CG32221/Prosbeta4/Ufd1-like/Rad23/Rpt4/lsn/Rpn9/Rrp45/Rpt6/ALiX/Der-2/Su(dx)/Prosbeta7/CG31633/Rrp40/Rpn3/Rpn10/EloC/Rpn12/Prosalpha4/CG33144/Rpn6/Rpn1/Usp5/Cbl/Rpt2/Vps2	50
GO:0007015	GO:0007015	actin filament organization	31/846	168/11257	2.40618e-06	0.000949525	0.000787497	IRSp53/cib/Src64B/ena/Arp2/Myo31DF/Ssrp/dia/capt/Arp3/twf/Svil/ck/cpb/HSPC300/Shrm/LamC/cpa/sn/Cortactin/RhoGEF2/GMF/Hip1/ALiX/CG43658/Cdc42/Arpc1/Pka-R1/Arpc5/mew/jvl	31
GO:0030163	GO:0030163	protein catabolic process	53/846	366/11257	2.52295e-06	0.000949525	0.000787497	Rpn8/Prosbeta6/Rpn13/SAK/Skp2/Prosalpha7/Der-1/Rpn2/CSN5/Prosbeta1/Prosalpha2/park/CSN4/CG7656/Prosalpha3/Prosalpha6/Vps37B/shrb/Rpn7/Cdc23/TER94/Prosalpha5/Rpn11/Bdbt/CG32581/CG32221/Prosbeta4/Ppt1/Ufd1-like/Rad23/Rpt4/beta-Man/lsn/Rpn9/Rpt6/ALiX/Der-2/Su(dx)/Prosbeta7/CG31633/Rpn3/Rpn10/EloC/Rpn12/Prosalpha4/CG33144/Rpn6/Rpn1/Usp5/Cbl/Rpt2/CG12163/Vps2	53
GO:0006974	GO:0006974	cellular response to DNA damage stimulus	39/846	237/11257	2.5311e-06	0.000949525	0.000787497	Ku80/Rrp1/tam/Mlh1/Xpac/Msh6/DNApol-epsilon255/CHES-1-like/RpII15/XRCC1/mre11/DNApol-iota/Pms2/spn-A/DNApol-eta/rad50/Rad9/okr/DNApol-delta/FANCI/Irbp18/DNApol-theta/CG6171/Snm1/Arp5/dpa/tefu/Rad23/CG4078/CG7044/mei-9/p53/DNApol-zeta/Xpd/Top3alpha/mio/Mcm6/Tfb4/Fancd2	39
GO:0043161	GO:0043161	proteasome-mediated ubiquitin-dependent protein catabolic process	39/846	239/11257	3.12658e-06	0.000958794	0.000795184	Rpn8/Prosbeta6/Rpn13/Skp2/Prosalpha7/Der-1/Rpn2/CSN5/Prosbeta1/Prosalpha2/park/CSN4/Prosalpha3/Prosalpha6/Rpn7/Cdc23/TER94/Prosalpha5/Rpn11/CG32221/Prosbeta4/Ufd1-like/Rad23/Rpt4/Rpn9/Rpt6/Der-2/Su(dx)/Prosbeta7/CG31633/Rpn3/Rpn10/Rpn12/Prosalpha4/CG33144/Rpn6/Rpn1/Usp5/Rpt2	39
GO:0008154	GO:0008154	actin polymerization or depolymerization	19/846	78/11257	3.45474e-06	0.000958794	0.000795184	IRSp53/Src64B/Arp2/Ssrp/dia/capt/Arp3/twf/Svil/cpb/HSPC300/LamC/cpa/Cortactin/GMF/ALiX/Cdc42/Arpc1/Arpc5	19
GO:0006511	GO:0006511	ubiquitin-dependent protein catabolic process	48/846	323/11257	3.65116e-06	0.000958794	0.000795184	Rpn8/Prosbeta6/Rpn13/Skp2/Prosalpha7/Der-1/Rpn2/CSN5/Prosbeta1/Prosalpha2/park/CSN4/CG7656/Prosalpha3/Prosalpha6/Vps37B/shrb/Rpn7/Cdc23/TER94/Prosalpha5/Rpn11/CG32581/CG32221/Prosbeta4/Ufd1-like/Rad23/Rpt4/lsn/Rpn9/Rpt6/ALiX/Der-2/Su(dx)/Prosbeta7/CG31633/Rpn3/Rpn10/EloC/Rpn12/Prosalpha4/CG33144/Rpn6/Rpn1/Usp5/Cbl/Rpt2/Vps2	48
GO:0010498	GO:0010498	proteasomal protein catabolic process	40/846	252/11257	4.72251e-06	0.00112739	0.000935011	Rpn8/Prosbeta6/Rpn13/Skp2/Prosalpha7/Der-1/Rpn2/CSN5/Prosbeta1/Prosalpha2/park/CSN4/Prosalpha3/Prosalpha6/Rpn7/Cdc23/TER94/Prosalpha5/Rpn11/CG32581/CG32221/Prosbeta4/Ufd1-like/Rad23/Rpt4/Rpn9/Rpt6/Der-2/Su(dx)/Prosbeta7/CG31633/Rpn3/Rpn10/Rpn12/Prosalpha4/CG33144/Rpn6/Rpn1/Usp5/Rpt2	40
GO:0019941	GO:0019941	modification-dependent protein catabolic process	48/846	327/11257	5.16156e-06	0.00112952	0.000936778	Rpn8/Prosbeta6/Rpn13/Skp2/Prosalpha7/Der-1/Rpn2/CSN5/Prosbeta1/Prosalpha2/park/CSN4/CG7656/Prosalpha3/Prosalpha6/Vps37B/shrb/Rpn7/Cdc23/TER94/Prosalpha5/Rpn11/CG32581/CG32221/Prosbeta4/Ufd1-like/Rad23/Rpt4/lsn/Rpn9/Rpt6/ALiX/Der-2/Su(dx)/Prosbeta7/CG31633/Rpn3/Rpn10/EloC/Rpn12/Prosalpha4/CG33144/Rpn6/Rpn1/Usp5/Cbl/Rpt2/Vps2	48
GO:0051493	GO:0051493	regulation of cytoskeleton organization	31/846	178/11257	8.33222e-06	0.00135686	0.00112532	Akap200/IRSp53/Src64B/ena/Arp2/rictor/Ssrp/dia/Cp110/Arp3/twf/Svil/nod/cpb/HSPC300/SAK/beta-Spec/LamC/cpa/Cortactin/RhoGEF2/Lst8/sstn/GMF/asl/Rcc1/CG43658/Cdc42/Arpc1/Arpc5/Patronin	31
GO:0032956	GO:0032956	regulation of actin cytoskeleton organization	23/846	113/11257	8.99639e-06	0.00135686	0.00112532	Akap200/IRSp53/Src64B/ena/Arp2/rictor/Ssrp/dia/Arp3/twf/Svil/cpb/HSPC300/LamC/cpa/Cortactin/RhoGEF2/Lst8/GMF/CG43658/Cdc42/Arpc1/Arpc5	23
GO:0008064	GO:0008064	regulation of actin polymerization or depolymerization	17/846	69/11257	9.52571e-06	0.00135686	0.00112532	IRSp53/Src64B/Arp2/Ssrp/dia/Arp3/twf/Svil/cpb/HSPC300/LamC/cpa/Cortactin/GMF/Cdc42/Arpc1/Arpc5	17
GO:0030832	GO:0030832	regulation of actin filament length	17/846	69/11257	9.52571e-06	0.00135686	0.00112532	IRSp53/Src64B/Arp2/Ssrp/dia/Arp3/twf/Svil/cpb/HSPC300/LamC/cpa/Cortactin/GMF/Cdc42/Arpc1/Arpc5	17
GO:0010499	GO:0010499	proteasomal ubiquitin-independent protein catabolic process	10/846	26/11257	9.53203e-06	0.00135686	0.00112532	Prosbeta6/Prosalpha7/Prosbeta1/Prosalpha2/Prosalpha3/Prosalpha6/Prosalpha5/Prosbeta4/Prosbeta7/Prosalpha4	10
GO:0046847	GO:0046847	filopodium assembly	13/846	43/11257	9.75671e-06	0.00135686	0.00112532	IRSp53/bnl/ena/Arp2/dia/Arp3/cpb/HSPC300/C1GalTA/cpa/sn/Cdc42/Arpc1	13
GO:0031344	GO:0031344	regulation of cell projection organization	28/846	154/11257	9.81732e-06	0.00135686	0.00112532	Efhc1.2/Dscam1/Imp/ena/Arp2/spict/rictor/dia/Arp3/twf/cpb/HSPC300/Wnt5/C1GalTA/sav/Sema1b/cpa/RhoGEF2/GMF/CHORD/Ppt1/Dlic/Cdc42/Shc/Arpc1/HDAC1/bif/fra	28
GO:0032970	GO:0032970	regulation of actin filament-based process	23/846	115/11257	1.21943e-05	0.00160111	0.00132789	Akap200/IRSp53/Src64B/ena/Arp2/rictor/Ssrp/dia/Arp3/twf/Svil/cpb/HSPC300/LamC/cpa/Cortactin/RhoGEF2/Lst8/GMF/CG43658/Cdc42/Arpc1/Arpc5	23
GO:0051603	GO:0051603	proteolysis involved in cellular protein catabolic process	49/846	349/11257	1.42418e-05	0.00177409	0.00147136	Rpn8/Prosbeta6/Rpn13/Skp2/Prosalpha7/Der-1/Rpn2/CSN5/Prosbeta1/Prosalpha2/park/CSN4/CG7656/Prosalpha3/Prosalpha6/Vps37B/shrb/Rpn7/Cdc23/TER94/Prosalpha5/Rpn11/CG32581/CG32221/Prosbeta4/Ufd1-like/Rad23/Rpt4/lsn/Rpn9/Rpt6/ALiX/Der-2/Su(dx)/Prosbeta7/CG31633/Rpn3/Rpn10/EloC/Rpn12/Prosalpha4/CG33144/Rpn6/Rpn1/Usp5/Cbl/Rpt2/CG12163/Vps2	49
GO:0044265	GO:0044265	cellular macromolecule catabolic process	63/846	489/11257	1.48629e-05	0.00177409	0.00147136	Rpn8/mbf1/Prosbeta6/Rpn13/Skp2/Prosalpha7/Der-1/Rpn2/CSN5/Prosbeta1/Prosalpha2/park/CSN4/Dcr-2/CG7656/Prosalpha3/su(sable)/Prosalpha6/Dis3/Vps37B/shrb/Rpn7/CG9705/CG6171/Cdc23/TER94/Prosalpha5/Zpr1/Rpn11/CG32581/CG32221/Prosbeta4/Ufd1-like/Rad23/Rpt4/beta-Man/lsn/Rat1/Rpn9/Rrp45/Rpt6/ALiX/Der-2/Su(dx)/Rcd-1/Prosbeta7/CG31633/CG3165/Rrp40/Rpn3/Rpn10/EloC/Rpn12/Prosalpha4/CG33144/Rpn6/Rpn1/Usp5/Cbl…	63
GO:0000278	GO:0000278	mitotic cell cycle	63/846	492/11257	1.80258e-05	0.00205808	0.00170689	Efhc1.2/Act42A/Grip71/luna/Klp10A/dia/larp/DNApol-epsilon255/JMJD5/CHES-1-like/RpII15/eco/CCT6/Act5C/dmt/CG15237/Sep2/Hrb87F/mre11/SAK/Skp2/l(2)gl/Rbf2/mst/spn-A/Cenp-C/Rad9/l(3)mbt/Dis3/Syx13/Mink/shrb/Cdc23/png/smo/dpa/Rae1/Pp4-19C/tefu/Mps1/Cdk8/MCPH1/Aladin/Sf3a1/Dlic/Su(H)/ALiX/htt/Rcc1/SH3PX1/Asap/beag/Cap-D2/Top2/Xpd/Rpn10/alphaTub84B/Mcm6/Fancd2/Slbp/Tap42/Patronin/Bap55	63
GO:0044257	GO:0044257	cellular protein catabolic process	49/846	353/11257	1.93894e-05	0.00212152	0.0017595	Rpn8/Prosbeta6/Rpn13/Skp2/Prosalpha7/Der-1/Rpn2/CSN5/Prosbeta1/Prosalpha2/park/CSN4/CG7656/Prosalpha3/Prosalpha6/Vps37B/shrb/Rpn7/Cdc23/TER94/Prosalpha5/Rpn11/CG32581/CG32221/Prosbeta4/Ufd1-like/Rad23/Rpt4/lsn/Rpn9/Rpt6/ALiX/Der-2/Su(dx)/Prosbeta7/CG31633/Rpn3/Rpn10/EloC/Rpn12/Prosalpha4/CG33144/Rpn6/Rpn1/Usp5/Cbl/Rpt2/CG12163/Vps2	49
GO:0006259	GO:0006259	DNA metabolic process	45/846	315/11257	2.05057e-05	0.00215391	0.00178637	Ku80/Rrp1/tam/Mlh1/Xpac/Msh6/DNApol-epsilon255/RpII15/XRCC1/mre11/stwl/DNApol-iota/Pms2/spn-A/DNApol-eta/rad50/Rad9/okr/Dcr-2/DNApol-delta/FANCI/Irbp18/Orc4/DNApol-theta/CG6171/Snm1/Arp5/dpa/Rif1/tefu/Rad23/CG4078/Rat1/mei-9/p53/HmgD/DNApol-zeta/Top2/CG3165/Xpd/Top3alpha/mio/Mcm6/Tfb4/Fancd2	45
GO:0032535	GO:0032535	regulation of cellular component size	30/846	178/11257	2.24386e-05	0.0022663	0.00187957	IRSp53/Ncc69/Src64B/Arp2/spict/p38a/rictor/Ssrp/dia/Arp3/twf/Svil/cpb/HSPC300/Wnt5/Ras85D/LamC/Sema1b/cpa/Cortactin/Lst8/GMF/CHORD/Best1/MAPk-Ak2/Cdc42/mio/Arpc1/bif/Arpc5	30
GO:0120035	GO:0120035	regulation of plasma membrane bounded cell projection organization	27/846	153/11257	2.46458e-05	0.00239704	0.001988	Efhc1.2/Dscam1/Imp/ena/Arp2/spict/rictor/dia/Arp3/twf/cpb/HSPC300/Wnt5/C1GalTA/sav/Sema1b/cpa/RhoGEF2/CHORD/Ppt1/Dlic/Cdc42/Shc/Arpc1/HDAC1/bif/fra	27
GO:0110053	GO:0110053	regulation of actin filament organization	18/846	82/11257	2.88871e-05	0.0027092	0.0022469	IRSp53/Src64B/Arp2/Ssrp/dia/Arp3/twf/Svil/cpb/HSPC300/LamC/cpa/Cortactin/GMF/CG43658/Cdc42/Arpc1/Arpc5	18
GO:0051960	GO:0051960	regulation of nervous system development	50/846	369/11257	3.06774e-05	0.00277789	0.00230387	Syn2/Efhc1.2/scb/tinc/Dscam1/Src64B/Imp/ena/Arp2/spict/rictor/Arp3/Fas2/twf/Actbeta/cpb/HSPC300/Wnt5/Ank2/Ras85D/l(2)gl/unk/beta-Spec/sav/ttk/gbb/Sema1b/RhoGEF2/plum/h/CHORD/Rae1/Ppt1/spartin/Dlic/hdc/p53/Rcc1/Cdc42/kibra/Shc/HDAC1/aop/Rab8/spn-F/bif/Mob4/shv/barc/fra	50
GO:0097435	GO:0097435	supramolecular fiber organization	40/846	273/11257	3.27326e-05	0.00284576	0.00236016	IRSp53/cib/Zasp66/Src64B/ena/Arp2/Myo31DF/TBCB/Ssrp/Klp10A/dia/capt/Arp3/twf/Svil/nod/ck/cpb/HSPC300/Shrm/beta-Spec/unc-45/LamC/cpa/sn/Cortactin/RhoGEF2/GMF/Hip1/ALiX/Ten-m/CG43658/Cdc42/Arpc1/Pka-R1/Arpc5/mew/CLIP-190/Patronin/jvl	40
GO:1902903	GO:1902903	regulation of supramolecular fiber organization	22/846	114/11257	3.35943e-05	0.00284576	0.00236016	IRSp53/Src64B/Arp2/Ssrp/dia/Arp3/twf/Svil/nod/cpb/HSPC300/beta-Spec/LamC/cpa/Cortactin/RhoGEF2/GMF/CG43658/Cdc42/Arpc1/Arpc5/Patronin	22
GO:0051130	GO:0051130	positive regulation of cellular component organization	44/846	314/11257	4.07263e-05	0.0033421	0.0027718	IRSp53/Imp/ena/Arp2/spict/wde/rictor/Ssrp/dia/Arp3/twf/nod/cpb/HSPC300/Wnt5/Gs1/Ank2/ash2/Su(var)3-3/park/gbb/cpa/Cortactin/Cdc23/GMF/Ppt1/Ada2b/Rpt4/spartin/Hip1/Rpt6/mib1/htt/CG43658/sdt/Cdc42/spri/Arpc1/z/shv/Arpc5/Cbl/Mitf/Yip1d1	44
GO:0043087	GO:0043087	regulation of GTPase activity	19/846	92/11257	4.31398e-05	0.00343288	0.00284709	RhoGAP15B/CenB1A/Pax/Rlip/RhoGAP18B/CG9135/CG1116/Exn/RhoGAP5A/Evi5/RN-tre/strat/Tbc1d15-17/RanGAP/CG42795/Asap/CG7742/drongo/Dhit	19
GO:0030041	GO:0030041	actin filament polymerization	16/846	71/11257	5.66459e-05	0.00435946	0.00361556	IRSp53/Arp2/Ssrp/dia/Arp3/twf/Svil/cpb/LamC/cpa/Cortactin/GMF/ALiX/Cdc42/Arpc1/Arpc5	16
GO:0043254	GO:0043254	regulation of protein-containing complex assembly	21/846	110/11257	5.9456e-05	0.00435946	0.00361556	IRSp53/Arp2/Ssrp/dia/Arp3/twf/Svil/nod/cpb/LamC/Cenp-C/cpa/Cortactin/GMF/Rpt4/Rpt6/Vps33B/Cdc42/Arpc1/Usp5/Arpc5	21
GO:0006302	GO:0006302	double-strand break repair	20/846	102/11257	5.97641e-05	0.00435946	0.00361556	Ku80/mre11/spn-A/DNApol-eta/rad50/okr/Irbp18/DNApol-theta/CG6171/Snm1/Arp5/dpa/tefu/CG4078/mei-9/DNApol-zeta/Top3alpha/mio/Mcm6/Fancd2	20
GO:0030036	GO:0030036	actin cytoskeleton organization	42/846	302/11257	7.22932e-05	0.00513087	0.00425533	Akap200/IRSp53/cib/Zasp66/Src64B/ena/Arp2/Myo31DF/rictor/Ssrp/dia/capt/Arp3/twf/Svil/ck/cpb/HSPC300/Shrm/l(2)gl/CG5022/unc-45/LamC/RhoGAP18B/cpa/sn/Cortactin/RhoGEF2/CG32982/Mrtf/Lst8/GMF/Hip1/ALiX/blow/CG43658/Cdc42/Arpc1/Pka-R1/Arpc5/mew/jvl	42
GO:0033043	GO:0033043	regulation of organelle organization	55/846	433/11257	7.67426e-05	0.00530332	0.00439835	Akap200/IRSp53/Src64B/ena/Arp2/wde/rictor/Ssrp/dia/Cp110/Arp3/twf/Svil/nod/cpb/HSPC300/Gs1/CG15237/ash2/SAK/CG5815/mrt/beta-Spec/LamC/Cenp-C/Su(var)3-3/park/cpa/Cortactin/RhoGEF2/Lst8/sstn/Cdc23/GMF/Mps1/Ada2b/CG4078/asl/htt/Rcc1/Asap/beag/l(3)neo38/CG43658/Vps33B/Xpd/Cdc42/mio/Arpc1/HDAC1/z/Arpc5/Mitf/Miro/Patronin	55
GO:0009886	GO:0009886	post-embryonic animal morphogenesis	56/846	445/11257	8.53801e-05	0.00568528	0.00471514	RhoGAP15B/cib/Myo31DF/Dronc/GEFmeso/Fas2/Gli/ck/Actbeta/tnc/Ras85D/ash2/emc/jumu/l(2)gl/unk/stck/ftz-f1/Rab30/Trf2/Su(var)3-3/gbb/B-H1/Gclc/Dif/sn/RhoGEF2/Exn/Mrtf/Atg6/TER94/ics/RhoGAP5A/Dark/msk/smo/Cdk8/Rbsn-5/BI-1/bowl/hdc/Su(H)/Su(dx)/cbt/Eip74EF/DCAF12/CG43658/Cdc42/egl/fuss/Shc/EloC/Cbl/mew/wls/Tap42	56
GO:0030833	GO:0030833	regulation of actin filament polymerization	15/846	66/11257	8.65999e-05	0.00568528	0.00471514	IRSp53/Arp2/Ssrp/dia/Arp3/twf/Svil/cpb/LamC/cpa/Cortactin/GMF/Cdc42/Arpc1/Arpc5	15
GO:0032271	GO:0032271	regulation of protein polymerization	16/846	74/11257	9.61713e-05	0.00615965	0.00510856	IRSp53/Arp2/Ssrp/dia/Arp3/twf/Svil/nod/cpb/LamC/cpa/Cortactin/GMF/Cdc42/Arpc1/Arpc5	16
GO:0030029	GO:0030029	actin filament-based process	43/846	316/11257	9.90277e-05	0.00619159	0.00513505	Akap200/IRSp53/cib/Zasp66/Src64B/ena/Arp2/Myo31DF/rictor/Ssrp/dia/capt/Arp3/twf/Svil/Mlc-c/ck/cpb/HSPC300/Shrm/l(2)gl/CG5022/unc-45/LamC/RhoGAP18B/cpa/sn/Cortactin/RhoGEF2/CG32982/Mrtf/Lst8/GMF/Hip1/ALiX/blow/CG43658/Cdc42/Arpc1/Pka-R1/Arpc5/mew/jvl	43
GO:0031532	GO:0031532	actin cytoskeleton reorganization	10/846	33/11257	0.000102359	0.00625102	0.00518433	Akap200/IRSp53/rictor/dia/Arp3/Shrm/RhoGEF2/CG32982/Cdc42/Arpc1	10
GO:0048707	GO:0048707	instar larval or pupal morphogenesis	54/846	431/11257	0.000127959	0.0073467	0.00609304	RhoGAP15B/Myo31DF/Dronc/GEFmeso/Fas2/Gli/ck/Actbeta/tnc/Ras85D/ash2/emc/jumu/l(2)gl/unk/stck/ftz-f1/Rab30/Trf2/Su(var)3-3/gbb/B-H1/Gclc/Dif/sn/RhoGEF2/Exn/Mrtf/Atg6/TER94/ics/RhoGAP5A/Dark/msk/smo/Cdk8/Rbsn-5/BI-1/bowl/hdc/Su(H)/Su(dx)/cbt/Eip74EF/DCAF12/CG43658/Cdc42/fuss/Shc/EloC/Cbl/mew/wls/Tap42	54
GO:0050790	GO:0050790	regulation of catalytic activity	48/846	370/11257	0.000130972	0.0073467	0.00609304	RhoGAP15B/Src64B/Lgr1/Dronc/EndoGI/NPFR/capt/CG14408/Spn55B/Ras85D/pip/l(2)gl/viaf/CenB1A/Pax/Rlip/Cyt-c-p/RhoGAP18B/Gadd45/CG9135/CG1116/Exn/ics/RhoGAP5A/Evi5/Dark/RN-tre/CG13551/strat/BI-1/aph-1/Tbc1d15-17/RanGAP/CycH/CG42795/p53/Asap/Cdc42/CG7742/Fem-1/Lgr4/CycY/drongo/PRAS40/SNF4Agamma/Dhit/Cbl/Atg14	48
GO:0009991	GO:0009991	response to extracellular stimulus	27/846	168/11257	0.00013104	0.0073467	0.00609304	CPT2/Imp/p38a/rictor/Ras85D/Hrb87F/stwl/SLC5A11/CG4629/Atg3/Wdr24/Atg6/Hsp27/REPTOR/Dark/Hsp68/rudhira/Arc1/Ac76E/BI-1/p53/mio/spidey/Mob4/SNF4Agamma/Mitf/Atg14	27
GO:0010591	GO:0010591	regulation of lamellipodium assembly	7/846	17/11257	0.000131491	0.0073467	0.00609304	ena/Arp3/twf/cpb/HSPC300/cpa/Cdc42	7
GO:1903046	GO:1903046	meiotic cell cycle process	31/846	205/11257	0.000137597	0.00752772	0.00624318	lds/Src64B/Axs/Grip71/Klp10A/dia/Msh6/larp/nod/eco/mre11/SAK/LamC/spn-A/rad50/Cenp-C/okr/Syx13/mei-S332/Rae1/tefu/Mps1/RanGAP/mia/mei-9/p53/Cap-D2/Top2/fest/mio/Fancd2	31
GO:0031175	GO:0031175	neuron projection development	58/846	476/11257	0.000155878	0.00835381	0.0069283	Mp/Efhc1.2/scb/Dscam1/Src64B/Imp/ena/spict/Dronc/dock/rictor/capt/CG6867/Arp3/Fas2/twf/Wnt5/Ank2/ash2/beta-Spec/sav/ftz-f1/sli/CSN5/Sema1b/Gclc/sn/shrb/RhoGEF2/CG9705/TER94/Ptp4E/Dark/dati/smo/Cont/CHORD/Ppt1/Cdk8/Ptp10D/Fas3/GlyRS/Dlic/ras/hdc/Ten-m/Cdc42/spri/Shc/Arpc1/HDAC1/Liprin-beta/bif/Mob4/mew/fra/Patronin/Bap55	58
GO:0048589	GO:0048589	developmental growth	47/846	364/11257	0.000171703	0.00891464	0.00739343	Syn2/scb/Dscam1/Src64B/Imp/ena/Arp2/spict/rictor/Csk/Arp3/Fas2/Actbeta/cpb/HSPC300/Wnt5/Ank2/Ras85D/Sep2/Alr/pip/l(2)gl/beta-Spec/sav/ttk/Plod/gbb/Sema1b/RhoGEF2/plum/Rae1/Ac76E/18w/spartin/Wbp2/hdc/p53/Ten-m/Cdc42/Top3alpha/kibra/spri/Rab8/Liprin-beta/CycY/bif/Mob4	47
GO:0030032	GO:0030032	lamellipodium assembly	8/846	23/11257	0.000174245	0.00891464	0.00739343	ena/Arp3/twf/cpb/HSPC300/cpa/SH3PX1/Cdc42	8
GO:0045595	GO:0045595	regulation of cell differentiation	53/846	426/11257	0.000176528	0.00891464	0.00739343	Efhc1.2/tinc/Dscam1/Src64B/Imp/spict/Dronc/rictor/asrij/Fas2/Gli/twf/Actbeta/mspo/Wnt5/C1GalTA/Ras85D/l(2)gl/unk/stck/sav/CSN5/ttk/Cenp-C/Pax/gbb/Sema1b/l(3)mbt/RhoGEF2/TER94/Dark/h/smo/CHORD/Ppt1/Dlic/hdc/Su(H)/mira/p53/Rcc1/Cdc42/kibra/spri/Shc/HDAC1/aop/spn-F/bif/Mob4/Cbl/barc/fra	53
GO:0006289	GO:0006289	nucleotide-excision repair	9/846	29/11257	0.000185797	0.00920569	0.00763482	Xpac/DNApol-epsilon255/RpII15/DNApol-delta/DNApol-theta/Rad23/mei-9/Xpd/Tfb4	9
GO:1902743	GO:1902743	regulation of lamellipodium organization	7/846	18/11257	0.000201279	0.00978814	0.00811787	ena/Arp3/twf/cpb/HSPC300/cpa/Cdc42	7
GO:0048638	GO:0048638	regulation of developmental growth	33/846	229/11257	0.00021571	0.0102992	0.00854171	Syn2/scb/Src64B/ena/Arp2/spict/rictor/Csk/Arp3/Fas2/Actbeta/cpb/HSPC300/Wnt5/Ank2/Ras85D/pip/l(2)gl/beta-Spec/sav/gbb/Sema1b/plum/Rae1/Ac76E/spartin/Wbp2/p53/Cdc42/kibra/Rab8/bif/Mob4	33
GO:1903047	GO:1903047	mitotic cell cycle process	45/846	348/11257	0.000227105	0.0103786	0.00860759	Efhc1.2/Act42A/luna/Klp10A/dia/JMJD5/CHES-1-like/eco/Act5C/dmt/CG15237/Sep2/mre11/l(2)gl/Rbf2/mst/spn-A/Cenp-C/Rad9/Mink/shrb/Cdc23/smo/dpa/Rae1/tefu/Mps1/Cdk8/Aladin/Su(H)/ALiX/htt/Rcc1/Asap/beag/Cap-D2/Top2/Xpd/Rpn10/Mcm6/Fancd2/Slbp/Tap42/Patronin/Bap55	45
GO:0051489	GO:0051489	regulation of filopodium assembly	10/846	36/11257	0.00022859	0.0103786	0.00860759	ena/Arp2/dia/Arp3/cpb/HSPC300/C1GalTA/cpa/Cdc42/Arpc1	10
GO:0008582	GO:0008582	regulation of synaptic growth at neuromuscular junction	20/846	112/11257	0.000229231	0.0103786	0.00860759	Syn2/scb/Src64B/ena/Arp2/spict/rictor/Arp3/Fas2/cpb/HSPC300/Ank2/beta-Spec/gbb/plum/Rae1/spartin/Cdc42/Rab8/Mob4	20
GO:0097581	GO:0097581	lamellipodium organization	8/846	24/11257	0.000244289	0.0107059	0.00887906	ena/Arp3/twf/cpb/HSPC300/cpa/SH3PX1/Cdc42	8
GO:0065009	GO:0065009	regulation of molecular function	54/846	442/11257	0.000244614	0.0107059	0.00887906	RhoGAP15B/Src64B/Lgr1/Dronc/EndoGI/Ssrp/NPFR/capt/CG14408/Spn55B/Ras85D/emc/pip/l(2)gl/ttk/Rgk1/viaf/CenB1A/Pax/Rlip/Cyt-c-p/RhoGAP18B/Gadd45/CG9135/CG1116/Exn/ics/Uba2/RhoGAP5A/Evi5/Dark/RN-tre/CG13551/strat/BI-1/aph-1/Tbc1d15-17/RanGAP/CycH/CG42795/p53/Asap/THADA/Cdc42/CG7742/Fem-1/Lgr4/CycY/drongo/PRAS40/SNF4Agamma/Dhit/Cbl/Atg14	54
GO:0051129	GO:0051129	negative regulation of cellular component organization	27/846	175/11257	0.00026125	0.0112067	0.0092944	scb/Src64B/ena/spict/Cp110/twf/Svil/cpb/CG15237/ash2/beta-Spec/park/Sema1b/cpa/plum/GMF/RhoGAP5A/Rae1/Mps1/CG4078/spartin/asl/beag/HDAC1/bif/Mob4/Patronin	27
GO:0031667	GO:0031667	response to nutrient levels	26/846	166/11257	0.000264592	0.0112067	0.0092944	CPT2/Imp/p38a/rictor/Ras85D/Hrb87F/SLC5A11/CG4629/Atg3/Wdr24/Atg6/Hsp27/REPTOR/Dark/Hsp68/rudhira/Arc1/Ac76E/BI-1/p53/mio/spidey/Mob4/SNF4Agamma/Mitf/Atg14	26
GO:0046513	GO:0046513	ceramide biosynthetic process	6/846	14/11257	0.0003144	0.0129124	0.010709	GlcT/SMSr/Pex3/Mulk/Spt-I/CG6962	6
GO:0007552	GO:0007552	metamorphosis	55/846	457/11257	0.000314698	0.0129124	0.010709	RhoGAP15B/Myo31DF/Dronc/GEFmeso/Fas2/Gli/ck/Actbeta/tnc/Ras85D/ash2/emc/jumu/l(2)gl/unk/stck/ftz-f1/Rab30/Trf2/Su(var)3-3/gbb/B-H1/Gclc/Dif/sn/RhoGEF2/Exn/Mrtf/Atg6/TER94/ics/RhoGAP5A/Dark/msk/smo/Cdk8/Rbsn-5/BI-1/bowl/hdc/Ptth/Su(H)/Su(dx)/cbt/Eip74EF/DCAF12/CG43658/Cdc42/fuss/Shc/EloC/Cbl/mew/wls/Tap42	55
GO:0051124	GO:0051124	synaptic growth at neuromuscular junction	23/846	141/11257	0.000323234	0.0130587	0.0108303	Syn2/scb/Src64B/Imp/ena/Arp2/spict/rictor/Arp3/Fas2/cpb/HSPC300/Ank2/beta-Spec/gbb/plum/Rae1/spartin/Ten-m/Cdc42/Rab8/Liprin-beta/Mob4	23
GO:0048732	GO:0048732	gland development	28/846	187/11257	0.000336572	0.0133915	0.0111063	scb/Src64B/Dronc/asrij/dia/Wnt5/dmt/Ras85D/stwl/l(2)gl/sli/CSN5/CG1129/Trf2/Dif/ocm/Dark/h/BI-1/GlyRS/bip1/hdc/Eip74EF/DCAF12/Rrp40/egl/mew/fra	28
GO:0008407	GO:0008407	chaeta morphogenesis	10/846	38/11257	0.000370484	0.0145208	0.0120429	capt/twf/ck/emc/unk/B-H1/sn/Arpc1/spn-F/pad	10
GO:0071695	GO:0071695	anatomical structure maturation	27/846	180/11257	0.000414588	0.0160104	0.0132784	Imp/Dronc/TBCB/capt/Fas2/Ras85D/l(2)gl/ftz-f1/CSN5/shrb/plum/Atg6/TER94/Cont/Rbsn-5/lsn/hdc/CalpB/mira/sll/egl/spn-F/Pka-R1/csul/Hydr2/fs(1)K10/jvl	27
GO:0034329	GO:0034329	cell junction assembly	32/846	228/11257	0.000431481	0.0164213	0.0136191	Syn2/scb/Src64B/Imp/ena/Arp2/spict/rictor/bark/Arp3/Fas2/Gli/pasi1/cpb/HSPC300/Ank2/l(2)gl/beta-Spec/gbb/plum/Cont/Rae1/sinu/spartin/Mcr/Lac/Ten-m/sdt/Cdc42/Rab8/Liprin-beta/Mob4	32
GO:1904396	GO:1904396	regulation of neuromuscular junction development	20/846	118/11257	0.000467389	0.017305	0.0143521	Syn2/scb/Src64B/ena/Arp2/spict/rictor/Arp3/Fas2/cpb/HSPC300/Ank2/beta-Spec/gbb/plum/Rae1/spartin/Cdc42/Rab8/Mob4	20
GO:0007423	GO:0007423	sensory organ development	56/846	475/11257	0.000467882	0.017305	0.0143521	Syn2/PIG-V/bnl/tinc/Src64B/ena/Dronc/capt/Arp3/Fas2/twf/ck/Actbeta/pie/Ras85D/Hrb87F/emc/jumu/Skp2/l(2)gl/unk/Nhe2/sav/CSN5/ttk/Rip11/CSN4/gbb/B-H1/sn/boi/klg/RhoGAP5A/Dark/msk/smo/toe/Cdk8/Su(H)/mib1/cbt/Asap/Ten-m/Cdc42/kibra/Shc/Arpc1/aop/spn-F/Smyd4-1/Usp5/Cbl/Mitf/pad/wls/fra	56
GO:0051963	GO:0051963	regulation of synapse assembly	20/846	119/11257	0.000523102	0.0190787	0.0158231	Syn2/scb/Src64B/ena/Arp2/spict/rictor/Arp3/Fas2/cpb/HSPC300/Ank2/beta-Spec/gbb/plum/Rae1/spartin/Cdc42/Rab8/Mob4	20
GO:0060491	GO:0060491	regulation of cell projection assembly	11/846	47/11257	0.000572729	0.0198303	0.0164464	ena/Arp2/dia/Arp3/twf/cpb/HSPC300/C1GalTA/cpa/Cdc42/Arpc1	11
GO:0120032	GO:0120032	regulation of plasma membrane bounded cell projection assembly	11/846	47/11257	0.000572729	0.0198303	0.0164464	ena/Arp2/dia/Arp3/twf/cpb/HSPC300/C1GalTA/cpa/Cdc42/Arpc1	11
GO:0051321	GO:0051321	meiotic cell cycle	31/846	222/11257	0.000575515	0.0198303	0.0164464	lds/Src64B/Axs/Grip71/Klp10A/dia/Msh6/larp/nod/eco/mre11/SAK/LamC/spn-A/rad50/Cenp-C/okr/Syx13/mei-S332/Rae1/tefu/Mps1/RanGAP/mia/mei-9/p53/Cap-D2/Top2/fest/mio/Fancd2	31
GO:0010647	GO:0010647	positive regulation of cell communication	51/846	426/11257	0.000582863	0.0198303	0.0164464	Mp/Akap200/Myd88/Src64B/Imp/Dronc/EndoGI/rictor/asrij/Csk/Actbeta/Rpn13/Ras85D/pip/l(2)gl/stck/beta-Spec/rempA/park/gbb/cactin/Gadd45/Dcr-2/RhoGEF2/Exn/Wdr24/Lst8/Uba2/smo/Rae1/dx/sotv/ALiX/GNBP1/shf/mib1/p53/cbt/SH3PX1/CG43658/Cdc42/kibra/Shc/mio/CycY/Pka-R1/Mob4/Tsp86D/shv/wls/fra	51
GO:0023056	GO:0023056	positive regulation of signaling	51/846	426/11257	0.000582863	0.0198303	0.0164464	Mp/Akap200/Myd88/Src64B/Imp/Dronc/EndoGI/rictor/asrij/Csk/Actbeta/Rpn13/Ras85D/pip/l(2)gl/stck/beta-Spec/rempA/park/gbb/cactin/Gadd45/Dcr-2/RhoGEF2/Exn/Wdr24/Lst8/Uba2/smo/Rae1/dx/sotv/ALiX/GNBP1/shf/mib1/p53/cbt/SH3PX1/CG43658/Cdc42/kibra/Shc/mio/CycY/Pka-R1/Mob4/Tsp86D/shv/wls/fra	51
GO:0009967	GO:0009967	positive regulation of signal transduction	48/846	395/11257	0.000602466	0.0198303	0.0164464	Mp/Akap200/Myd88/Src64B/Imp/Dronc/EndoGI/rictor/asrij/Csk/Actbeta/Rpn13/Ras85D/pip/l(2)gl/stck/rempA/gbb/cactin/Gadd45/Dcr-2/RhoGEF2/Exn/Wdr24/Lst8/Uba2/smo/Rae1/dx/sotv/ALiX/GNBP1/shf/mib1/p53/cbt/CG43658/Cdc42/kibra/Shc/mio/CycY/Pka-R1/Mob4/Tsp86D/shv/wls/fra	48
GO:0042326	GO:0042326	negative regulation of phosphorylation	14/846	70/11257	0.000603359	0.0198303	0.0164464	Ssrp/cpb/CG14408/ash2/l(2)gl/stck/park/cpa/ics/RhoGAP5A/p53/PRAS40/Usp5/Cbl	14
GO:0022416	GO:0022416	chaeta development	15/846	78/11257	0.000604121	0.0198303	0.0164464	Dronc/capt/Arp3/twf/ck/emc/unk/B-H1/sn/Dark/Cdk8/Ten-m/Arpc1/spn-F/pad	15
GO:0042594	GO:0042594	response to starvation	23/846	148/11257	0.000655453	0.0212496	0.0176236	CPT2/Imp/p38a/rictor/Ras85D/Hrb87F/CG4629/Atg3/Wdr24/Atg6/Hsp27/REPTOR/Dark/Hsp68/rudhira/Arc1/Ac76E/BI-1/p53/mio/SNF4Agamma/Mitf/Atg14	23
GO:0034330	GO:0034330	cell junction organization	45/846	366/11257	0.000689703	0.0218955	0.0181592	Syn2/scb/Src64B/Imp/ena/Arp2/spict/rictor/bark/Csk/Arp3/Fas2/Gli/pasi1/cpb/HSPC300/C1GalTA/Ank2/Smu1/l(2)gl/stck/beta-Spec/gbb/plum/klg/RhoGAP5A/Cont/Rae1/sinu/Ada2b/spartin/Mcr/dpr1/Lac/SH3PX1/beag/Ten-m/sdt/Cdc42/Srpk79D/Rab8/Liprin-beta/Mob4/shv/Yip1d1	45
GO:0035070	GO:0035070	salivary gland histolysis	9/846	34/11257	0.000692052	0.0218955	0.0181592	Dronc/l(2)gl/Trf2/Dif/Dark/BI-1/hdc/Eip74EF/DCAF12	9
GO:0048469	GO:0048469	cell maturation	26/846	177/11257	0.000727238	0.0223878	0.0185675	Imp/Dronc/TBCB/capt/Fas2/Ras85D/l(2)gl/ftz-f1/CSN5/shrb/plum/Atg6/TER94/Rbsn-5/lsn/hdc/CalpB/mira/sll/egl/spn-F/Pka-R1/csul/Hydr2/fs(1)K10/jvl	26
GO:0036297	GO:0036297	interstrand cross-link repair	6/846	16/11257	0.000735739	0.0223878	0.0185675	Xpac/Msh6/DNApol-theta/Snm1/mei-9/Fancd2	6
GO:0043248	GO:0043248	proteasome assembly	6/846	16/11257	0.000735739	0.0223878	0.0185675	PSMG1/Rpn13/Rpn9/Rpn10/Rpn6/Usp5	6
GO:0007424	GO:0007424	open tracheal system development	33/846	245/11257	0.000741712	0.0223878	0.0185675	scb/bnl/Src64B/stac/bark/dia/Fas2/Gli/pasi1/mbf1/dmt/Ras85D/sli/ttk/Trf2/RhoGEF2/Mrtf/sgl/Ptp4E/h/Zpr1/sinu/Ptp10D/Dlic/Mcr/hdc/Membrin/Lac/Cdc42/Shc/apt/aop/mew	33
GO:0051961	GO:0051961	negative regulation of nervous system development	18/846	105/11257	0.00076836	0.0228214	0.0189271	scb/Src64B/ena/spict/Fas2/l(2)gl/ttk/Sema1b/plum/Rae1/spartin/hdc/p53/kibra/HDAC1/aop/bif/Mob4	18
GO:0050807	GO:0050807	regulation of synapse organization	24/846	159/11257	0.000775261	0.0228214	0.0189271	Syn2/scb/Src64B/ena/Arp2/spict/rictor/Arp3/Fas2/cpb/HSPC300/Ank2/beta-Spec/gbb/plum/Rae1/Ada2b/spartin/Ten-m/Cdc42/Rab8/Mob4/shv/Yip1d1	24
GO:0048569	GO:0048569	post-embryonic animal organ development	53/846	453/11257	0.000788375	0.0228214	0.0189271	RhoGAP15B/scb/Myo31DF/GEFmeso/asrij/Fas2/Gli/ck/Actbeta/tnc/Ras85D/ash2/emc/jumu/stwl/unk/stck/ftz-f1/CSN5/Rab30/CG1129/Su(var)3-3/gbb/B-H1/Gclc/sn/RhoGEF2/Exn/Mrtf/ics/ocm/RhoGAP5A/msk/smo/nom/Cdk8/Rbsn-5/GlyRS/bowl/bip1/Su(H)/Su(dx)/cbt/CG43658/Rrp40/Cdc42/fuss/Shc/EloC/Cbl/mew/wls/Tap42	53
GO:0043547	GO:0043547	positive regulation of GTPase activity	13/846	64/11257	0.000802904	0.0228214	0.0189271	RhoGAP15B/Rlip/RhoGAP18B/CG1116/Exn/RhoGAP5A/Evi5/RN-tre/strat/Tbc1d15-17/RanGAP/Asap/Dhit	13
GO:0001654	GO:0001654	eye development	47/846	390/11257	0.000820008	0.0228214	0.0189271	Syn2/PIG-V/bnl/tinc/Src64B/ena/Dronc/capt/Fas2/Actbeta/pie/Ras85D/Hrb87F/emc/jumu/Skp2/l(2)gl/unk/Nhe2/sav/CSN5/ttk/Rip11/CSN4/gbb/B-H1/boi/klg/RhoGAP5A/Dark/msk/smo/toe/Su(H)/Asap/Ten-m/Cdc42/kibra/Shc/Arpc1/aop/Smyd4-1/Usp5/Cbl/Mitf/wls/fra	47
GO:0048880	GO:0048880	sensory system development	47/846	390/11257	0.000820008	0.0228214	0.0189271	Syn2/PIG-V/bnl/tinc/Src64B/ena/Dronc/capt/Fas2/Actbeta/pie/Ras85D/Hrb87F/emc/jumu/Skp2/l(2)gl/unk/Nhe2/sav/CSN5/ttk/Rip11/CSN4/gbb/B-H1/boi/klg/RhoGAP5A/Dark/msk/smo/toe/Su(H)/Asap/Ten-m/Cdc42/kibra/Shc/Arpc1/aop/Smyd4-1/Usp5/Cbl/Mitf/wls/fra	47
GO:0150063	GO:0150063	visual system development	47/846	390/11257	0.000820008	0.0228214	0.0189271	Syn2/PIG-V/bnl/tinc/Src64B/ena/Dronc/capt/Fas2/Actbeta/pie/Ras85D/Hrb87F/emc/jumu/Skp2/l(2)gl/unk/Nhe2/sav/CSN5/ttk/Rip11/CSN4/gbb/B-H1/boi/klg/RhoGAP5A/Dark/msk/smo/toe/Su(H)/Asap/Ten-m/Cdc42/kibra/Shc/Arpc1/aop/Smyd4-1/Usp5/Cbl/Mitf/wls/fra	47
GO:0007389	GO:0007389	pattern specification process	57/846	497/11257	0.000825602	0.0228214	0.0189271	Myd88/ena/Myo31DF/TBCB/GEFmeso/capt/Gli/ck/Ras85D/ash2/emc/pip/l(2)gl/stck/sli/CSN5/spn-A/Su(var)3-3/gbb/cactin/B-H1/sn/boi/MED31/sgl/TER94/h/msk/smo/Ada2b/Cdk8/Rbsn-5/bowl/lsn/Su(H)/Cf2/mira/Su(dx)/sll/cbt/Cdc42/egl/fuss/Shc/apt/HDAC1/nmd/spn-F/EloC/Pka-R1/csul/Cbl/mew/wls/fra/fs(1)K10/jvl	57
GO:1901888	GO:1901888	regulation of cell junction assembly	20/846	124/11257	0.000896523	0.0242754	0.020133	Syn2/scb/Src64B/ena/Arp2/spict/rictor/Arp3/Fas2/cpb/HSPC300/Ank2/beta-Spec/gbb/plum/Rae1/spartin/Cdc42/Rab8/Mob4	20
GO:0048858	GO:0048858	cell projection morphogenesis	52/846	445/11257	0.000905935	0.0242754	0.020133	Mp/scb/bnl/Dscam1/Src64B/ena/spict/Dronc/dock/rictor/capt/CG6867/Fas2/Wnt5/Ank2/ash2/beta-Spec/sav/ftz-f1/sli/CSN5/Sema1b/Gclc/sn/shrb/RhoGEF2/CG9705/TER94/Ptp4E/Dark/smo/Cont/Ppt1/Cdk8/Ptp10D/Fas3/GlyRS/Dlic/ras/hdc/Ten-m/Cdc42/spri/Shc/Arpc1/HDAC1/Liprin-beta/bif/Mob4/mew/fra/Bap55	52
GO:0120039	GO:0120039	plasma membrane bounded cell projection morphogenesis	52/846	445/11257	0.000905935	0.0242754	0.020133	Mp/scb/bnl/Dscam1/Src64B/ena/spict/Dronc/dock/rictor/capt/CG6867/Fas2/Wnt5/Ank2/ash2/beta-Spec/sav/ftz-f1/sli/CSN5/Sema1b/Gclc/sn/shrb/RhoGEF2/CG9705/TER94/Ptp4E/Dark/smo/Cont/Ppt1/Cdk8/Ptp10D/Fas3/GlyRS/Dlic/ras/hdc/Ten-m/Cdc42/spri/Shc/Arpc1/HDAC1/Liprin-beta/bif/Mob4/mew/fra/Bap55	52
GO:0048749	GO:0048749	compound eye development	45/846	371/11257	0.000918287	0.0243578	0.0202013	Syn2/PIG-V/bnl/Src64B/ena/Dronc/capt/Actbeta/pie/Ras85D/Hrb87F/emc/jumu/Skp2/l(2)gl/unk/Nhe2/sav/CSN5/ttk/Rip11/CSN4/gbb/B-H1/boi/klg/RhoGAP5A/Dark/msk/smo/toe/Su(H)/Asap/Ten-m/Cdc42/kibra/Shc/Arpc1/aop/Smyd4-1/Usp5/Cbl/Mitf/wls/fra	45
GO:0007528	GO:0007528	neuromuscular junction development	26/846	180/11257	0.000938487	0.0246101	0.0204106	Syn2/scb/Src64B/Imp/ena/Arp2/spict/rictor/Arp3/Fas2/cpb/HSPC300/C1GalTA/Ank2/Smu1/beta-Spec/gbb/plum/Rae1/spartin/beag/Ten-m/Cdc42/Rab8/Liprin-beta/Mob4	26
GO:0021700	GO:0021700	developmental maturation	29/846	209/11257	0.000946541	0.0246101	0.0204106	Imp/Dronc/TBCB/p38a/capt/Fas2/Ras85D/l(2)gl/ftz-f1/CSN5/shrb/plum/Atg6/TER94/Cont/Rbsn-5/lsn/hdc/CalpB/mira/sll/egl/spn-F/Pka-R1/csul/shv/Hydr2/fs(1)K10/jvl	29
GO:0044089	GO:0044089	positive regulation of cellular component biogenesis	23/846	153/11257	0.00104665	0.026876	0.0222899	IRSp53/ena/Arp2/wde/rictor/Ssrp/dia/Arp3/nod/cpb/HSPC300/Ank2/Su(var)3-3/gbb/cpa/GMF/Rpt4/Rpt6/htt/CG43658/Cdc42/Arpc1/Arpc5	23
GO:0045664	GO:0045664	regulation of neuron differentiation	27/846	191/11257	0.00105416	0.026876	0.0222899	Efhc1.2/tinc/Dscam1/Src64B/Imp/spict/rictor/Fas2/twf/Wnt5/Ras85D/sav/ttk/Sema1b/RhoGEF2/CHORD/Ppt1/Dlic/hdc/p53/Cdc42/Shc/HDAC1/aop/spn-F/bif/fra	27
GO:0007127	GO:0007127	meiosis I	13/846	66/11257	0.00108706	0.0274483	0.0227645	Grip71/Klp10A/nod/spn-A/okr/Rae1/Mps1/mia/mei-9/p53/Top2/fest/Fancd2	13
GO:0050767	GO:0050767	regulation of neurogenesis	35/846	271/11257	0.00111705	0.0279369	0.0231697	Efhc1.2/tinc/Dscam1/Src64B/Imp/spict/rictor/Fas2/twf/Actbeta/Wnt5/Ras85D/l(2)gl/unk/sav/ttk/Sema1b/RhoGEF2/h/CHORD/Ppt1/Dlic/hdc/p53/Rcc1/Cdc42/kibra/Shc/HDAC1/aop/spn-F/bif/Mob4/barc/fra	35
GO:0045926	GO:0045926	negative regulation of growth	17/846	100/11257	0.00117221	0.0290397	0.0240843	scb/Src64B/ena/spict/Csk/l(2)gl/sav/hfp/Sema1b/plum/Rae1/Ac76E/spartin/kibra/spidey/bif/Mob4	17
GO:0048640	GO:0048640	negative regulation of developmental growth	15/846	83/11257	0.00118371	0.0290506	0.0240934	scb/Src64B/ena/spict/Csk/l(2)gl/sav/Sema1b/plum/Rae1/Ac76E/spartin/kibra/bif/Mob4	15
GO:0040007	GO:0040007	growth	50/846	429/11257	0.00119586	0.0290771	0.0241153	Syn2/scb/Dscam1/Src64B/Imp/ena/Arp2/spict/rictor/Csk/Arp3/Fas2/Actbeta/cpb/HSPC300/Wnt5/Ank2/Ras85D/Sep2/Alr/pip/l(2)gl/beta-Spec/sav/ttk/hfp/Plod/gbb/Sema1b/RhoGEF2/plum/Wdr24/Rae1/Ac76E/18w/spartin/Wbp2/hdc/p53/Ten-m/Cdc42/Top3alpha/kibra/spri/Rab8/Liprin-beta/spidey/CycY/bif/Mob4	50
GO:0060284	GO:0060284	regulation of cell development	43/846	355/11257	0.00121608	0.0292974	0.024298	Efhc1.2/tinc/Dscam1/Src64B/Imp/spict/Dronc/rictor/Fas2/Gli/twf/Actbeta/Wnt5/Ras85D/l(2)gl/unk/stck/sav/ttk/Sema1b/RhoGEF2/TER94/Dark/h/CHORD/Ppt1/Dlic/hdc/mira/p53/Rcc1/Cdc42/kibra/spri/Shc/HDAC1/aop/spn-F/bif/Mob4/Cbl/barc/fra	43
GO:0051345	GO:0051345	positive regulation of hydrolase activity	18/846	110/11257	0.00134131	0.0315831	0.0261937	RhoGAP15B/Dronc/pip/Rlip/Cyt-c-p/RhoGAP18B/CG1116/Exn/RhoGAP5A/Evi5/Dark/RN-tre/strat/Tbc1d15-17/RanGAP/p53/Asap/Dhit	18
GO:0061982	GO:0061982	meiosis I cell cycle process	18/846	110/11257	0.00134131	0.0315831	0.0261937	Src64B/Grip71/Klp10A/dia/Msh6/nod/mre11/spn-A/okr/Rae1/tefu/Mps1/mia/mei-9/p53/Top2/fest/Fancd2	18
GO:0032990	GO:0032990	cell part morphogenesis	52/846	453/11257	0.00135185	0.0315831	0.0261937	Mp/scb/bnl/Dscam1/Src64B/ena/spict/Dronc/dock/rictor/capt/CG6867/Fas2/Wnt5/Ank2/ash2/beta-Spec/sav/ftz-f1/sli/CSN5/Sema1b/Gclc/sn/shrb/RhoGEF2/CG9705/TER94/Ptp4E/Dark/smo/Cont/Ppt1/Cdk8/Ptp10D/Fas3/GlyRS/Dlic/ras/hdc/Ten-m/Cdc42/spri/Shc/Arpc1/HDAC1/Liprin-beta/bif/Mob4/mew/fra/Bap55	52
GO:0044419	GO:0044419	interspecies interaction between organisms	53/846	464/11257	0.00136306	0.0315831	0.0261937	upd3/Myd88/Wsck/Dscam1/Src64B/PGRP-LE/subdued/Dronc/p38a/Dredd/Fer2LCH/dia/gb/cathD/Ras85D/MED16/jumu/unc-45/Mvb12/FoxK/CG14411/Dcr-2/Dis3/Dif/Lectin-galC1/Trx-2/Rab14/Hat1/Exn/GILT1/Atg6/TER94/Hsp27/ClC-b/Uba2/Dark/HBS1/CG13551/tefu/Ufd1-like/18w/Mcr/EMRE/Dci/GNBP1/Der-2/HmgD/Vps33B/Tab2/Cdc42/Shc/Srpk79D/pirk	53
GO:0060541	GO:0060541	respiratory system development	33/846	254/11257	0.00138279	0.0315831	0.0261937	scb/bnl/Src64B/stac/bark/dia/Fas2/Gli/pasi1/mbf1/dmt/Ras85D/sli/ttk/Trf2/RhoGEF2/Mrtf/sgl/Ptp4E/h/Zpr1/sinu/Ptp10D/Dlic/Mcr/hdc/Membrin/Lac/Cdc42/Shc/apt/aop/mew	33
GO:0035239	GO:0035239	tube morphogenesis	56/846	497/11257	0.00138523	0.0315831	0.0261937	RhoGAP15B/bnl/stac/Myo31DF/GEFmeso/Fas2/Gli/ck/Actbeta/tnc/Act5C/dmt/Ras85D/ash2/emc/jumu/unk/stck/ftz-f1/Rab30/ttk/Su(var)3-3/gbb/B-H1/Gclc/sn/RhoGEF2/Exn/Mrtf/ics/Ptp4E/crn/RhoGAP5A/h/msk/smo/Zpr1/Cdk8/Ptp10D/Rbsn-5/bowl/Dlic/hdc/Su(H)/Membrin/Su(dx)/cbt/CG43658/Cdc42/fuss/Shc/EloC/Cbl/mew/wls/Tap42	56
GO:0048812	GO:0048812	neuron projection morphogenesis	51/846	443/11257	0.00140641	0.0315831	0.0261937	Mp/scb/Dscam1/Src64B/ena/spict/Dronc/dock/rictor/capt/CG6867/Fas2/Wnt5/Ank2/ash2/beta-Spec/sav/ftz-f1/sli/CSN5/Sema1b/Gclc/sn/shrb/RhoGEF2/CG9705/TER94/Ptp4E/Dark/smo/Cont/Ppt1/Cdk8/Ptp10D/Fas3/GlyRS/Dlic/ras/hdc/Ten-m/Cdc42/spri/Shc/Arpc1/HDAC1/Liprin-beta/bif/Mob4/mew/fra/Bap55	51
GO:0048592	GO:0048592	eye morphogenesis	39/846	316/11257	0.00142699	0.0315831	0.0261937	Syn2/PIG-V/bnl/tinc/Src64B/Dronc/capt/Fas2/Actbeta/Ras85D/Hrb87F/emc/l(2)gl/Nhe2/sav/CSN5/ttk/Rip11/CSN4/gbb/B-H1/boi/klg/Dark/msk/smo/Su(H)/Asap/Ten-m/Cdc42/kibra/Shc/Arpc1/aop/Smyd4-1/Usp5/Cbl/Mitf/wls	39
GO:0090596	GO:0090596	sensory organ morphogenesis	39/846	316/11257	0.00142699	0.0315831	0.0261937	Syn2/PIG-V/bnl/tinc/Src64B/Dronc/capt/Fas2/Actbeta/Ras85D/Hrb87F/emc/l(2)gl/Nhe2/sav/CSN5/ttk/Rip11/CSN4/gbb/B-H1/boi/klg/Dark/msk/smo/Su(H)/Asap/Ten-m/Cdc42/kibra/Shc/Arpc1/aop/Smyd4-1/Usp5/Cbl/Mitf/wls	39
GO:0006897	GO:0006897	endocytosis	24/846	166/11257	0.00143122	0.0315831	0.0261937	Culd/CG18659/Gli/twf/Rlip/Cortactin/CG32579/Atg6/Rab4/rudhira/dx/Ppt1/Rbsn-5/spartin/Mcr/Hip1/mib1/Su(dx)/rush/sdt/Cdc42/spri/aop/Cbl	24
GO:0001933	GO:0001933	negative regulation of protein phosphorylation	13/846	68/11257	0.00145065	0.031745	0.026328	Ssrp/cpb/CG14408/ash2/l(2)gl/stck/park/cpa/ics/RhoGAP5A/PRAS40/Usp5/Cbl	13
GO:0006643	GO:0006643	membrane lipid metabolic process	17/846	102/11257	0.00146835	0.0318669	0.0264291	PIG-V/GlcAT-S/C1GalTA/CG6660/cert/GlcT/SMSr/PIG-N/Pex3/Mulk/Spt-I/PIG-H/PIG-F/PGAP2/CG6962/Sply/PIG-U	17
GO:0060562	GO:0060562	epithelial tube morphogenesis	52/846	455/11257	0.00148986	0.0320687	0.0265965	RhoGAP15B/bnl/stac/Myo31DF/GEFmeso/Fas2/Gli/ck/Actbeta/tnc/dmt/Ras85D/ash2/emc/jumu/unk/stck/ftz-f1/Rab30/ttk/Su(var)3-3/gbb/B-H1/Gclc/sn/RhoGEF2/Exn/Mrtf/ics/Ptp4E/crn/RhoGAP5A/msk/smo/Zpr1/Cdk8/Ptp10D/Rbsn-5/bowl/hdc/Su(H)/Su(dx)/cbt/CG43658/Cdc42/fuss/Shc/EloC/Cbl/mew/wls/Tap42	52
GO:0140013	GO:0140013	meiotic nuclear division	24/846	167/11257	0.00155585	0.0332168	0.0275486	lds/Axs/Grip71/Klp10A/larp/nod/eco/SAK/LamC/spn-A/Cenp-C/okr/Syx13/mei-S332/Rae1/Mps1/RanGAP/mia/mei-9/p53/Top2/fest/mio/Fancd2	24
GO:0009607	GO:0009607	response to biotic stimulus	52/846	457/11257	0.00164014	0.0341825	0.0283495	upd3/Myd88/Wsck/Dscam1/Src64B/PGRP-LE/subdued/Dronc/p38a/Dredd/Fer2LCH/dia/gb/cathD/Ras85D/MED16/jumu/unc-45/FoxK/CG14411/Dcr-2/Dis3/Dif/Lectin-galC1/Trx-2/Rab14/Hat1/Exn/GILT1/Atg6/TER94/Hsp27/ClC-b/Uba2/Dark/HBS1/CG13551/tefu/Ufd1-like/18w/Mcr/EMRE/Dci/GNBP1/Der-2/HmgD/Vps33B/Tab2/Cdc42/Shc/Srpk79D/pirk	52
GO:0043207	GO:0043207	response to external biotic stimulus	52/846	457/11257	0.00164014	0.0341825	0.0283495	upd3/Myd88/Wsck/Dscam1/Src64B/PGRP-LE/subdued/Dronc/p38a/Dredd/Fer2LCH/dia/gb/cathD/Ras85D/MED16/jumu/unc-45/FoxK/CG14411/Dcr-2/Dis3/Dif/Lectin-galC1/Trx-2/Rab14/Hat1/Exn/GILT1/Atg6/TER94/Hsp27/ClC-b/Uba2/Dark/HBS1/CG13551/tefu/Ufd1-like/18w/Mcr/EMRE/Dci/GNBP1/Der-2/HmgD/Vps33B/Tab2/Cdc42/Shc/Srpk79D/pirk	52
GO:0051707	GO:0051707	response to other organism	52/846	457/11257	0.00164014	0.0341825	0.0283495	upd3/Myd88/Wsck/Dscam1/Src64B/PGRP-LE/subdued/Dronc/p38a/Dredd/Fer2LCH/dia/gb/cathD/Ras85D/MED16/jumu/unc-45/FoxK/CG14411/Dcr-2/Dis3/Dif/Lectin-galC1/Trx-2/Rab14/Hat1/Exn/GILT1/Atg6/TER94/Hsp27/ClC-b/Uba2/Dark/HBS1/CG13551/tefu/Ufd1-like/18w/Mcr/EMRE/Dci/GNBP1/Der-2/HmgD/Vps33B/Tab2/Cdc42/Shc/Srpk79D/pirk	52
GO:0046467	GO:0046467	membrane lipid biosynthetic process	15/846	86/11257	0.00171693	0.0352239	0.0292132	PIG-V/GlcAT-S/C1GalTA/CG6660/GlcT/SMSr/PIG-N/Pex3/Mulk/Spt-I/PIG-H/PIG-F/PGAP2/CG6962/PIG-U	15
GO:0090305	GO:0090305	nucleic acid phosphodiester bond hydrolysis	15/846	86/11257	0.00171693	0.0352239	0.0292132	Xpac/RpII15/mre11/rad50/Dcr-2/Pop1/CG6171/Rat1/Rrp45/CG1671/mei-9/CG3165/Rrp40/Xpd/CG5645	15
GO:0006399	GO:0006399	tRNA metabolic process	20/846	131/11257	0.00178962	0.0361479	0.0299795	CG3645/Nsun2/CG10463/ArgRS-m/CG14231/AspRS/CG5292/ArgRS/Pop1/RtcB/GlyRS/Rrp45/metl/rswl/beta-PheRS/IleRS-m/THADA/Rrp40/ValRS-m/TyrRS-m	20
GO:0003002	GO:0003002	regionalization	52/846	459/11257	0.00180356	0.0361479	0.0299795	Myd88/ena/GEFmeso/capt/Gli/ck/Ras85D/ash2/emc/pip/l(2)gl/sli/CSN5/spn-A/Su(var)3-3/gbb/cactin/B-H1/sn/boi/MED31/sgl/TER94/h/msk/smo/Ada2b/Cdk8/Rbsn-5/bowl/lsn/Su(H)/Cf2/mira/Su(dx)/sll/cbt/egl/fuss/Shc/apt/HDAC1/nmd/spn-F/EloC/csul/Cbl/mew/wls/fra/fs(1)K10/jvl	52
GO:0006284	GO:0006284	base-excision repair	5/846	13/11257	0.0018308	0.0361479	0.0299795	Rrp1/Xpac/DNApol-epsilon255/XRCC1/DNApol-delta	5
GO:0043162	GO:0043162	ubiquitin-dependent protein catabolic process via the multivesicular body sorting pathway	5/846	13/11257	0.0018308	0.0361479	0.0299795	Vps37B/shrb/lsn/ALiX/Vps2	5
GO:0046889	GO:0046889	positive regulation of lipid biosynthetic process	5/846	13/11257	0.0018308	0.0361479	0.0299795	fh/Ptth/Pex3/Spt-I/CG8009	5
GO:0010212	GO:0010212	response to ionizing radiation	9/846	39/11257	0.00199166	0.0379024	0.0314347	Ku80/sav/spn-A/Rad9/okr/Dark/tefu/p53/HDAC1	9
GO:0051494	GO:0051494	negative regulation of cytoskeleton organization	9/846	39/11257	0.00199166	0.0379024	0.0314347	Cp110/twf/Svil/cpb/beta-Spec/cpa/GMF/asl/Patronin	9
GO:0120192	GO:0120192	tight junction assembly	9/846	39/11257	0.00199166	0.0379024	0.0314347	bark/Gli/pasi1/l(2)gl/Cont/sinu/Mcr/Lac/sdt	9
GO:0120193	GO:0120193	tight junction organization	9/846	39/11257	0.00199166	0.0379024	0.0314347	bark/Gli/pasi1/l(2)gl/Cont/sinu/Mcr/Lac/sdt	9
GO:0007431	GO:0007431	salivary gland development	19/846	123/11257	0.00200626	0.0379024	0.0314347	scb/Src64B/Dronc/dia/Wnt5/dmt/l(2)gl/sli/Trf2/Dif/Dark/h/BI-1/hdc/Eip74EF/DCAF12/egl/mew/fra	19
GO:0035272	GO:0035272	exocrine system development	19/846	123/11257	0.00200626	0.0379024	0.0314347	scb/Src64B/Dronc/dia/Wnt5/dmt/l(2)gl/sli/Trf2/Dif/Dark/h/BI-1/hdc/Eip74EF/DCAF12/egl/mew/fra	19
GO:0051258	GO:0051258	protein polymerization	17/846	105/11257	0.00202948	0.0380179	0.0315305	IRSp53/Arp2/Ssrp/dia/Arp3/twf/Svil/nod/cpb/LamC/cpa/Cortactin/GMF/ALiX/Cdc42/Arpc1/Arpc5	17
GO:0045005	GO:0045005	DNA-dependent DNA replication maintenance of fidelity	6/846	19/11257	0.00205083	0.0380179	0.0315305	tam/DNApol-epsilon255/spn-A/DNApol-delta/DNApol-theta/Rif1	6
GO:0048667	GO:0048667	cell morphogenesis involved in neuron differentiation	50/846	440/11257	0.00205581	0.0380179	0.0315305	Mp/scb/Dscam1/Src64B/ena/spict/Dronc/dock/rictor/capt/CG6867/Fas2/Wnt5/Ank2/Ras85D/ash2/beta-Spec/sav/ftz-f1/sli/CSN5/Sema1b/Gclc/shrb/RhoGEF2/CG9705/TER94/Ptp4E/Dark/smo/Cont/Ppt1/Cdk8/Ptp10D/Fas3/GlyRS/Dlic/ras/hdc/Ten-m/Cdc42/spri/Shc/Arpc1/HDAC1/Liprin-beta/bif/mew/fra/Bap55	50
GO:0000280	GO:0000280	nuclear division	37/846	303/11257	0.00225228	0.0410541	0.0340486	lds/Axs/Grip71/luna/Klp10A/larp/nod/eco/dmt/CG15237/SAK/mst/LamC/spn-A/Cenp-C/okr/Syx13/Mink/Cdc23/mei-S332/Rae1/Mps1/Aladin/RanGAP/mia/mei-9/p53/Rcc1/beag/Cap-D2/Top2/Xpd/fest/mio/Rpn10/Fancd2/Slbp	37
GO:0016477	GO:0016477	cell migration	37/846	303/11257	0.00225228	0.0410541	0.0340486	scb/bnl/CG44774/Dscam1/ena/Csk/Gli/twf/cpb/Shrm/Ras85D/sli/CSN5/ttk/Sema1b/oys/sn/Cortactin/Mrtf/sgl/GMF/crn/Evi5/18w/CalpB/Mulk/Cdc42/kibra/spri/Shc/apt/aop/Sply/Arpc5/Cbl/mew/fra	37
GO:0031334	GO:0031334	positive regulation of protein-containing complex assembly	11/846	55/11257	0.00226689	0.0410541	0.0340486	IRSp53/Arp2/Ssrp/dia/Arp3/nod/GMF/Rpt4/Rpt6/Arpc1/Arpc5	11
GO:0051336	GO:0051336	regulation of hydrolase activity	29/846	222/11257	0.00241815	0.0434935	0.0360717	RhoGAP15B/Dronc/EndoGI/Spn55B/pip/viaf/CenB1A/Pax/Rlip/Cyt-c-p/RhoGAP18B/CG9135/CG1116/Exn/RhoGAP5A/Evi5/Dark/RN-tre/CG13551/strat/BI-1/Tbc1d15-17/RanGAP/CG42795/p53/Asap/CG7742/drongo/Dhit	29
GO:0010975	GO:0010975	regulation of neuron projection development	18/846	116/11257	0.00247252	0.044169	0.0366319	Efhc1.2/Dscam1/Imp/spict/rictor/twf/Wnt5/sav/Sema1b/RhoGEF2/CHORD/Ppt1/Dlic/Cdc42/Shc/HDAC1/bif/fra	18
GO:0007416	GO:0007416	synapse assembly	24/846	173/11257	0.00251636	0.0446484	0.0370295	Syn2/scb/Src64B/Imp/ena/Arp2/spict/rictor/Arp3/Fas2/Gli/cpb/HSPC300/Ank2/beta-Spec/gbb/plum/Rae1/spartin/Ten-m/Cdc42/Rab8/Liprin-beta/Mob4	24
GO:0030334	GO:0030334	regulation of cell migration	14/846	81/11257	0.00263666	0.0458818	0.0380525	scb/bnl/CG44774/Dscam1/ena/Gli/sli/ttk/Sema1b/Evi5/spri/aop/Cbl/fra	14
GO:0001745	GO:0001745	compound eye morphogenesis	37/846	306/11257	0.00267146	0.0458818	0.0380525	Syn2/PIG-V/bnl/Src64B/Dronc/capt/Actbeta/Ras85D/Hrb87F/emc/l(2)gl/Nhe2/sav/CSN5/ttk/Rip11/CSN4/gbb/B-H1/boi/klg/Dark/msk/smo/Su(H)/Asap/Ten-m/Cdc42/kibra/Shc/Arpc1/aop/Smyd4-1/Usp5/Cbl/Mitf/wls	37
GO:0000731	GO:0000731	DNA synthesis involved in DNA repair	5/846	14/11257	0.00267324	0.0458818	0.0380525	DNApol-iota/DNApol-eta/okr/DNApol-theta/DNApol-zeta	5
GO:0006778	GO:0006778	porphyrin-containing compound metabolic process	5/846	14/11257	0.00267324	0.0458818	0.0380525	Ho/l(3)02640/Ppox/CG13551/FeCH	5
GO:0042168	GO:0042168	heme metabolic process	5/846	14/11257	0.00267324	0.0458818	0.0380525	Ho/l(3)02640/Ppox/CG13551/FeCH	5
GO:0045834	GO:0045834	positive regulation of lipid metabolic process	6/846	20/11257	0.00274584	0.0465374	0.0385961	fh/Ptth/Pex3/Spt-I/CG8009/Atg14	6
GO:0051241	GO:0051241	negative regulation of multicellular organismal process	25/846	184/11257	0.00275626	0.0465374	0.0385961	scb/Src64B/ena/spict/Csk/Fas2/C1GalTA/Ras85D/l(2)gl/sav/CSN5/ttk/Sema1b/plum/Rae1/Ac76E/spartin/hdc/Su(H)/p53/kibra/HDAC1/aop/bif/Mob4	25
GO:0071363	GO:0071363	cellular response to growth factor stimulus	16/846	99/11257	0.0027646	0.0465374	0.0385961	bnl/Src64B/spict/Ras85D/gbb/Ptp4E/Zpr1/sotv/Ptp10D/spartin/cbt/fuss/Shc/aop/PRAS40/fra	16
GO:0098609	GO:0098609	cell-cell adhesion	19/846	127/11257	0.00291368	0.0474946	0.03939	scb/Src64B/Fas2/Gli/stck/sli/Lectin-galC1/plum/wech/klg/Cont/Rab4/Fas3/Lac/Ten-m/CG17716/glec/aop/mew	19
GO:0051674	GO:0051674	localization of cell	42/846	361/11257	0.00295904	0.0474946	0.03939	Efhc1.2/scb/bnl/CG44774/Dscam1/ena/Csk/Gli/twf/cpb/HSPC300/Shrm/Ras85D/SAK/sli/CSN5/ttk/Sema1b/oys/sn/Cortactin/Mrtf/sgl/GMF/crn/Evi5/18w/CalpB/asl/Mulk/Cdc42/kibra/spri/Shc/apt/aop/Sply/Arpc5/Cbl/mew/fra/jvl	42
GO:0007173	GO:0007173	epidermal growth factor receptor signaling pathway	12/846	65/11257	0.00296332	0.0474946	0.03939	Src64B/Fas2/Ras85D/Mvb12/ttk/Ptp4E/RhoGAP5A/Zpr1/Ptp10D/Shc/aop/Cbl	12
GO:0010948	GO:0010948	negative regulation of cell cycle process	12/846	65/11257	0.00296332	0.0474946	0.03939	Cp110/CHES-1-like/CG15237/mre11/Rbf2/smo/tefu/Mps1/asl/beag/Xpd/spidey	12
GO:0038127	GO:0038127	ERBB signaling pathway	12/846	65/11257	0.00296332	0.0474946	0.03939	Src64B/Fas2/Ras85D/Mvb12/ttk/Ptp4E/RhoGAP5A/Zpr1/Ptp10D/Shc/aop/Cbl	12
GO:0001754	GO:0001754	eye photoreceptor cell differentiation	26/846	195/11257	0.0029842	0.0474946	0.03939	Syn2/PIG-V/tinc/Src64B/capt/Actbeta/Ras85D/emc/l(2)gl/sav/CSN5/ttk/Rip11/CSN4/gbb/B-H1/boi/klg/msk/Ten-m/kibra/Shc/aop/Smyd4-1/Usp5/Cbl	26
GO:0042325	GO:0042325	regulation of phosphorylation	32/846	256/11257	0.00301283	0.0474946	0.03939	bnl/Src64B/rictor/Ssrp/Actbeta/cpb/CG14408/Ras85D/ash2/l(2)gl/stck/Tspo/park/gbb/Gadd45/cpa/fh/ics/RhoGAP5A/ALiX/CycH/CG7044/p53/MAPk-Ak2/Cdc42/CycY/Pka-R1/PRAS40/SNF4Agamma/Usp5/Cbl/Atg14	32
GO:0031668	GO:0031668	cellular response to extracellular stimulus	15/846	91/11257	0.0030443	0.0474946	0.03939	rictor/Ras85D/stwl/CG4629/Atg3/Wdr24/Atg6/BI-1/p53/mio/spidey/Mob4/SNF4Agamma/Mitf/Atg14	15
GO:0007143	GO:0007143	female meiotic nuclear division	11/846	57/11257	0.00304702	0.0474946	0.03939	lds/Axs/Grip71/Klp10A/nod/spn-A/Cenp-C/Syx13/mei-S332/Mps1/mei-9	11
GO:0070848	GO:0070848	response to growth factor	16/846	100/11257	0.00306791	0.0474946	0.03939	bnl/Src64B/spict/Ras85D/gbb/Ptp4E/Zpr1/sotv/Ptp10D/spartin/cbt/fuss/Shc/aop/PRAS40/fra	16
GO:0008543	GO:0008543	fibroblast growth factor receptor signaling pathway	8/846	34/11257	0.00308042	0.0474946	0.03939	bnl/Src64B/Ras85D/Ptp4E/Zpr1/Ptp10D/Shc/aop	8
GO:0044344	GO:0044344	cellular response to fibroblast growth factor stimulus	8/846	34/11257	0.00308042	0.0474946	0.03939	bnl/Src64B/Ras85D/Ptp4E/Zpr1/Ptp10D/Shc/aop	8
GO:0071774	GO:0071774	response to fibroblast growth factor	8/846	34/11257	0.00308042	0.0474946	0.03939	bnl/Src64B/Ras85D/Ptp4E/Zpr1/Ptp10D/Shc/aop	8
GO:1903829	GO:1903829	positive regulation of cellular protein localization	8/846	34/11257	0.00308042	0.0474946	0.03939	Akap200/rempA/Rep/smo/Aladin/p53/Asap/sdt	8
GO:0035071	GO:0035071	salivary gland cell autophagic cell death	7/846	27/11257	0.00309276	0.0474946	0.03939	l(2)gl/Trf2/Dark/BI-1/hdc/Eip74EF/DCAF12	7
GO:0040012	GO:0040012	regulation of locomotion	18/846	119/11257	0.00328642	0.049881	0.0413692	scb/bnl/CG44774/Dscam1/ena/Gli/Wnt5/sli/ttk/Sema1b/Evi5/Ppt1/Ten-m/spri/Shc/aop/Cbl/fra	18
GO:0035120	GO:0035120	post-embryonic appendage morphogenesis	37/846	310/11257	0.00333365	0.049881	0.0413692	RhoGAP15B/GEFmeso/Gli/ck/Actbeta/tnc/Ras85D/ash2/emc/jumu/unk/stck/ftz-f1/Su(var)3-3/gbb/Gclc/sn/RhoGEF2/Exn/Mrtf/ics/RhoGAP5A/msk/smo/Cdk8/Rbsn-5/bowl/Su(H)/Su(dx)/CG43658/Cdc42/fuss/Shc/EloC/Cbl/mew/wls	37
GO:0001700	GO:0001700	embryonic development via the syncytial blastoderm	23/846	167/11257	0.0033591	0.049881	0.0413692	upd3/scb/ena/Dronc/dia/Arp3/Ras85D/emc/jumu/l(2)gl/stck/Rab30/gbb/Sema1b/l(3)mbt/RhoGEF2/sinu/Rif1/Mcr/cbt/Cdc42/Arpc1/aop	23
GO:0098542	GO:0098542	defense response to other organism	45/846	396/11257	0.00336601	0.049881	0.0413692	Myd88/Wsck/Src64B/PGRP-LE/subdued/Dronc/p38a/Dredd/dia/gb/cathD/Ras85D/jumu/unc-45/FoxK/CG14411/Dcr-2/Dis3/Dif/Lectin-galC1/Trx-2/Rab14/Hat1/Exn/GILT1/Atg6/Hsp27/ClC-b/Dark/HBS1/CG13551/tefu/18w/Mcr/EMRE/Dci/GNBP1/Der-2/HmgD/Vps33B/Tab2/Cdc42/Shc/Srpk79D/pirk	45
GO:0007435	GO:0007435	salivary gland morphogenesis	15/846	92/11257	0.00339152	0.049881	0.0413692	Src64B/Dronc/dia/Wnt5/l(2)gl/Trf2/Dif/Dark/h/BI-1/hdc/Eip74EF/DCAF12/egl/mew	15
GO:0022612	GO:0022612	gland morphogenesis	15/846	92/11257	0.00339152	0.049881	0.0413692	Src64B/Dronc/dia/Wnt5/l(2)gl/Trf2/Dif/Dark/h/BI-1/hdc/Eip74EF/DCAF12/egl/mew	15
GO:0000904	GO:0000904	cell morphogenesis involved in differentiation	53/846	484/11257	0.00339164	0.049881	0.0413692	Mp/scb/Dscam1/Src64B/ena/spict/Dronc/dock/rictor/dia/capt/CG6867/Fas2/Wnt5/Ank2/Shrm/Ras85D/ash2/stck/beta-Spec/sav/ftz-f1/sli/CSN5/Sema1b/Gclc/shrb/RhoGEF2/CG9705/TER94/Ptp4E/Dark/smo/Cont/Ppt1/Cdk8/Ptp10D/Fas3/GlyRS/Dlic/ras/hdc/Ten-m/Cdc42/spri/Shc/Arpc1/HDAC1/Liprin-beta/bif/mew/fra/Bap55	53
GO:0046530	GO:0046530	photoreceptor cell differentiation	28/846	217/11257	0.00340011	0.049881	0.0413692	Syn2/PIG-V/tinc/Src64B/capt/Actbeta/Ras85D/emc/l(2)gl/sav/CSN5/ttk/Rip11/CSN4/gbb/B-H1/boi/klg/msk/p53/Ten-m/sdt/kibra/Shc/aop/Smyd4-1/Usp5/Cbl	28

## Sheet: D15_UP
	ID	Description	GeneRatio	BgRatio	pvalue	p.adjust	qvalue	geneID	Count
GO:0009628	GO:0009628	response to abiotic stimulus	18/98	419/11257	1.7338e-08	1.67312e-05	1.58962e-05	Ptth/DNApol-eta/yuri/spn-A/h/Cib2/Hsp27/Hsf/Hsp26/ninaD/Xpac/Hsp23/Su(var)3-9/Mps1/CHES-1-like/p38a/jus/CIA30	18
GO:0042026	GO:0042026	protein refolding	1998-04-01	24/11257	5.02088e-05	0.0230072	0.021859	Hsp27/Hsp26/Hsp23/Hsp68	4
GO:0009408	GO:0009408	response to heat	1998-06-01	81/11257	7.1525e-05	0.0230072	0.021859	Hsp27/Hsf/Hsp26/Hsp23/p38a/CIA30	6
GO:0007143	GO:0007143	female meiotic nuclear division	1998-05-01	57/11257	0.000132048	0.0318567	0.0302669	lds/spn-A/Grip71/ball/Mps1	5
GO:0001666	GO:0001666	response to hypoxia	1998-05-01	62/11257	0.000197192	0.0380581	0.0361588	h/Hsp23/Mps1/CHES-1-like/CIA30	5
GO:0007127	GO:0007127	meiosis I	1998-05-01	66/11257	0.000264968	0.0392038	0.0372474	Fancd2/spn-A/Grip71/ball/Mps1	5
GO:0036293	GO:0036293	response to decreased oxygen levels	1998-05-01	67/11257	0.00028438	0.0392038	0.0372474	h/Hsp23/Mps1/CHES-1-like/CIA30	5
GO:0045143	GO:0045143	homologous chromosome segregation	1998-03-01	17/11257	0.000398198	0.0480327	0.0456356	Fancd2/ball/Mps1	3
GO:0070482	GO:0070482	response to oxygen levels	1998-05-01	74/11257	0.000452128	0.0484781	0.0460589	h/Hsp23/Mps1/CHES-1-like/CIA30	5

## Sheet: D30_UP
	ID	Description	GeneRatio	BgRatio	pvalue	p.adjust	qvalue	geneID	Count
GO:0042440	GO:0042440	pigment metabolic process	18/539	112/11257	5.61243e-06	0.0133015	0.0120992	Gart/Pfas/CG34423/v/Itgbn/st/Shc/Uros1/Shmt/egr/EMC3/Dronc/ninaD/Rac2/dl/Exn/Rho1/Spn27A	18
GO:0006259	GO:0006259	DNA metabolic process	33/539	315/11257	1.89223e-05	0.022423	0.0203963	Fancd2/rad50/DNApol-eta/spn-A/FANCI/HmgD/spn-E/Pms2/RecQ4/Cdc7/Su(var)3-9/Rrp1/spel1/mu2/Mlh1/agt/Irbp18/Xpac/geminin/stwl/mre11/cutlet/Top3alpha/Ude/Rad9/Irbp/gkt/timeout/CG6171/DNAlig1/Dsp1/Spf45/mip40	33
GO:0006952	GO:0006952	defense response	39/539	411/11257	3.33289e-05	0.0232336	0.0211336	Lectin-galC1/Pvf2/Myo61F/HmgD/insc/Srpk79D/Itgbn/p38a/PGRP-SD/CG7408/GILT2/Ets21C/Shc/pirk/PGRP-LE/Tep1/BomS3/Dro/egr/Dronc/CG9008/FMRFaR/inv/krz/Rel/Rac2/vir-1/Hsp27/BomS5/jumu/Charon/Thor/dl/Exn/nub/Dsp1/Rho1/Spn27A/wisp	39
GO:0006364	GO:0006364	rRNA processing	19/539	142/11257	4.55345e-05	0.0232336	0.0211336	Fib/CG13096/CG11417/CG5645/pit/RpLP0-like/CG7544/CG15916/CG8064/CG6712/CG12301/Pop1/CG8545/CG4022/RpS28b/CG13185/CG13097/l(3)07882/RpS21	19
GO:0006281	GO:0006281	DNA repair	23/539	193/11257	4.9016e-05	0.0232336	0.0211336	Fancd2/rad50/DNApol-eta/spn-A/FANCI/Pms2/RecQ4/Cdc7/Rrp1/spel1/mu2/Mlh1/agt/Irbp18/Xpac/mre11/Top3alpha/Rad9/Irbp/gkt/timeout/CG6171/Spf45	23
GO:0016072	GO:0016072	rRNA metabolic process	19/539	149/11257	8.84843e-05	0.0325257	0.0295858	Fib/CG13096/CG11417/CG5645/pit/RpLP0-like/CG7544/CG15916/CG8064/CG6712/CG12301/Pop1/CG8545/CG4022/RpS28b/CG13185/CG13097/l(3)07882/RpS21	19
GO:0042254	GO:0042254	ribosome biogenesis	24/539	216/11257	0.000104083	0.0325257	0.0295858	Fib/CG13096/CG11417/RpS5b/CG5645/pit/RpLP0-like/CG7544/CG15916/CG8064/CG6712/RpL24-like/CG12301/Pop1/CG8545/Dbp21E2/RpS15/CG7839/CG4022/RpS28b/CG13185/CG13097/l(3)07882/RpS21	24
GO:0034470	GO:0034470	ncRNA processing	27/539	258/11257	0.000109791	0.0325257	0.0295858	CG5292/Fib/CG13096/CG14701/CG11417/CG5645/pit/RpLP0-like/CG7544/CG18048/CG15916/CG8064/Archease/CG6712/Cdk8/CG12301/Pop1/CG8545/CG3645/CG4022/RpS28b/CG13185/CG13097/Mettl3/Uba4/l(3)07882/RpS21	27
GO:1903047	GO:1903047	mitotic cell cycle process	33/539	348/11257	0.000135924	0.0340245	0.0309492	Fancd2/Efhc1.2/l(2)gl/spn-A/Mink/ball/Moe/neb/insc/scra/spn-E/CHES-1-like/ctp/RecQ4/del/dmt/smt3/CG31687/nudE/Cdk8/mre11/CG5921/Cenp-C/CG33288/Rad9/Cap-D2/DNAlig1/Mps1/Act57B/Rho1/Aladin/wisp/Cdc23	33
GO:0035107	GO:0035107	appendage morphogenesis	31/539	321/11257	0.000155496	0.0340245	0.0309492	qua/grk/sog/unk/ctp/Shc/Usp8/sd/lz/CG43658/tow/wmd/ash2/sty/tnc/Ser/f/inv/vri/Cdk8/jumu/myo/Exn/nub/Dok/tx/RhoGAP15B/dysf/lft/Rho1/Gli	31
GO:0098542	GO:0098542	defense response to other organism	36/539	396/11257	0.000159587	0.0340245	0.0309492	Lectin-galC1/Pvf2/Myo61F/HmgD/insc/Srpk79D/Itgbn/p38a/PGRP-SD/CG7408/GILT2/Ets21C/Shc/pirk/PGRP-LE/Tep1/BomS3/Dro/egr/Dronc/CG9008/inv/Rel/Rac2/vir-1/Hsp27/jumu/Charon/Thor/dl/Exn/nub/Dsp1/Rho1/Spn27A/wisp	36
GO:0006974	GO:0006974	cellular response to DNA damage stimulus	25/539	237/11257	0.000172791	0.0340245	0.0309492	Fancd2/rad50/DNApol-eta/spn-A/FANCI/CHES-1-like/Pms2/RecQ4/Cdc7/Rrp1/spel1/mu2/Mlh1/agt/Irbp18/Xpac/Rel/mre11/Top3alpha/Rad9/Irbp/gkt/timeout/CG6171/Spf45	25
GO:0006575	GO:0006575	cellular modified amino acid metabolic process	13/539	85/11257	0.000186632	0.0340245	0.0309492	Sardh/Gnmt/CG8665/Ahcy/GstO3/Shmt/CG9547/Nmdmc/GstD9/GstS1/GstD10/GstE1/Eip55E	13
GO:0048736	GO:0048736	appendage development	31/539	329/11257	0.000241655	0.0409087	0.0372112	qua/grk/sog/unk/ctp/Shc/Usp8/sd/lz/CG43658/tow/wmd/ash2/sty/tnc/Ser/f/inv/vri/Cdk8/jumu/myo/Exn/nub/Dok/tx/RhoGAP15B/dysf/lft/Rho1/Gli	31
GO:0035006	GO:0035006	melanization defense response	9/539	46/11257	0.000278404	0.0439879	0.0400121	Itgbn/Shc/egr/Dronc/Rac2/dl/Exn/Rho1/Spn27A	9
GO:0035114	GO:0035114	imaginal disc-derived appendage morphogenesis	30/539	319/11257	0.000313493	0.0464361	0.042239	qua/grk/sog/unk/ctp/Shc/Usp8/sd/lz/CG43658/tow/wmd/ash2/sty/tnc/Ser/f/inv/vri/Cdk8/jumu/myo/Exn/Dok/tx/RhoGAP15B/dysf/lft/Rho1/Gli	30
GO:0002376	GO:0002376	immune system process	38/539	444/11257	0.000358429	0.0464781	0.0422772	InR/Lectin-galC1/Pvf2/HmgD/Itgbn/p38a/PGRP-SD/Shc/PGRP-LE/Tep1/lz/BomS3/Dro/sty/egr/Ser/Dronc/smt3/C1GalTA/RYBP/CG9008/Galphaq/Rel/Rac2/vir-1/stwl/Charon/Thor/dl/Exn/nub/CG1572/Kr/Dsp1/Rho1/RpS21/Spn27A/wisp	38
GO:0000278	GO:0000278	mitotic cell cycle	41/539	492/11257	0.000368321	0.0464781	0.0422772	Fancd2/Efhc1.2/l(2)gl/spn-A/Mink/ball/Moe/neb/insc/Skp2/scra/spn-E/CHES-1-like/ctp/RecQ4/Cdc7/del/dmt/Grip71/Ser/CCT6/smt3/CG31687/geminin/nudE/Cdk8/mre11/CG5921/Dlc90F/SMC2/Cenp-C/CG33288/Rad9/Cap-D2/DNAlig1/Mps1/Act57B/Rho1/Aladin/wisp/Cdc23	41
GO:1902850	GO:1902850	microtubule cytoskeleton organization involved in mitosis	13/539	91/11257	0.000372609	0.0464781	0.0422772	Efhc1.2/l(2)gl/Mink/ball/Moe/insc/ctp/del/smt3/nudE/CG33288/Aladin/wisp	13
GO:0035120	GO:0035120	post-embryonic appendage morphogenesis	29/539	310/11257	0.000428892	0.0466752	0.0424565	qua/grk/sog/unk/ctp/Shc/Usp8/sd/CG43658/tow/wmd/ash2/sty/tnc/Ser/f/inv/vri/Cdk8/jumu/myo/Exn/Dok/tx/RhoGAP15B/dysf/lft/Rho1/Gli	29
GO:0048737	GO:0048737	imaginal disc-derived appendage development	30/539	326/11257	0.000452887	0.0466752	0.0424565	qua/grk/sog/unk/ctp/Shc/Usp8/sd/lz/CG43658/tow/wmd/ash2/sty/tnc/Ser/f/inv/vri/Cdk8/jumu/myo/Exn/Dok/tx/RhoGAP15B/dysf/lft/Rho1/Gli	30
GO:0006730	GO:0006730	one-carbon metabolic process	6/539	22/11257	0.000452966	0.0466752	0.0424565	Gnmt/CG8665/CAHbeta/Shmt/Nmdmc/CAH8	6
GO:0009161	GO:0009161	ribonucleoside monophosphate metabolic process	6/539	22/11257	0.000452966	0.0466752	0.0424565	Gart/Pfas/CG11089/Prps/veil/Paics	6
GO:0006582	GO:0006582	melanin metabolic process	9/539	50/11257	0.000533935	0.0497949	0.0452942	Itgbn/Shc/egr/Dronc/Rac2/dl/Exn/Rho1/Spn27A	9
GO:1901606	GO:1901606	alpha-amino acid catabolic process	9/539	50/11257	0.000533935	0.0497949	0.0452942	Sardh/Ahcy/CG15093/v/CG3999/Shmt/CG9547/CG6638/P5CDh2	9
GO:0060562	GO:0060562	epithelial tube morphogenesis	38/539	455/11257	0.000576282	0.0497949	0.0452942	bnl/qua/Moe/Myo61F/grk/Myo31DF/sog/unk/ctp/Shc/Usp8/sd/CG43658/dmt/tow/wmd/ash2/sty/tnc/Ser/f/inv/vri/Cdk8/ImpE1/Vha13/jumu/myo/Exn/Dok/tx/RhoGAP15B/par-6/Kr/dysf/lft/Rho1/Gli	38
GO:0009950	GO:0009950	dorsal/ventral axis specification	11/539	72/11257	0.000580934	0.0497949	0.0452942	spn-A/grk/clos/pip/spn-E/sog/Shc/sty/dl/sel/ea	11
GO:1905515	GO:1905515	non-motile cilium assembly	6/539	23/11257	0.000588294	0.0497949	0.0452942	nompB/cep290/asl/Oseg4/dila/Oseg2	6
