# Supplementary material for: Aging and Light Stress Result in Overlapping and Unique Gene Expression Changes in Photoreceptors
Source: Genes (Basel). 2022 Jan 29;13(2):264. doi: 10.3390/genes13020264 (PMC8872477; doi:10.3390/genes13020264)
Supplement: Supplementary file 1 [file genes-13-00264-s001.zip › Table S3.xlsx]

## Sheet: 5hr_up_only
	ID	Description	GeneRatio	BgRatio	pvalue	p.adjust	qvalue	geneID	Count
GO:0042773	GO:0042773	ATP synthesis coupled electron transport	12/178	85/11257	8.13068e-09	9.29931e-06	8.82772e-06	ND-B14.5B/RFeSP/UQCR-C2/COX7C/ND-B14/ND-ASHI/ND-23/dj-1beta/ND-75/UQCR-C1/ND-B18/ND-51	12
GO:0022904	GO:0022904	respiratory electron transport chain	12/178	91/11257	1.79576e-08	9.29931e-06	8.82772e-06	ND-B14.5B/RFeSP/UQCR-C2/COX7C/ND-B14/ND-ASHI/ND-23/dj-1beta/ND-75/UQCR-C1/ND-B18/ND-51	12
GO:0046034	GO:0046034	ATP metabolic process	15/178	155/11257	2.12138e-08	9.29931e-06	8.82772e-06	ND-B14.5B/RFeSP/UQCR-C2/COX7C/ND-B14/ND-ASHI/sun/ND-23/dj-1beta/Eno/ND-75/UQCR-C1/ND-B18/PyK/ND-51	15
GO:0022900	GO:0022900	electron transport chain	12/178	94/11257	2.6085e-08	9.29931e-06	8.82772e-06	ND-B14.5B/RFeSP/UQCR-C2/COX7C/ND-B14/ND-ASHI/ND-23/dj-1beta/ND-75/UQCR-C1/ND-B18/ND-51	12
GO:0002181	GO:0002181	cytoplasmic translation	12/178	133/11257	1.22765e-06	0.000194514	0.00018465	eIF2D/RpL28/RpL34a/RpL14/RpL34b/RpL6/RpL24/RpL19/RpLP0/RpL23A/RpL7/RpS14a	12
GO:0042273	GO:0042273	ribosomal large subunit biogenesis	7/178	62/11257	5.18982e-05	0.00616723	0.00585448	eIF6/RpL14/RpL6/RpL24/RpLP0/RpL23A/RpL7	7
GO:0042255	GO:0042255	ribosome assembly	6/178	54/11257	0.000197728	0.0187974	0.0178441	eIF6/RpL6/RpL24/RpLP0/RpL23A/RpS14a	6
GO:0000027	GO:0000027	ribosomal large subunit assembly	4/178	20/11257	0.000240206	0.0214084	0.0203227	RpL6/RpL24/RpLP0/RpL23A	4
GO:0009132	GO:0009132	nucleoside diphosphate metabolic process	5/178	38/11257	0.000307269	0.0257745	0.0244674	dnk/awd/Eno/Dak1/PyK	5
GO:0019693	GO:0019693	ribose phosphate metabolic process	10/178	186/11257	0.000737777	0.0457473	0.0434273	CG42813/AcCoAS/dnk/sun/awd/Eno/Dak1/CG7920/PyK/Hmgs	10
GO:0006084	GO:0006084	acetyl-CoA metabolic process	3/178	12/11257	0.00076994	0.0457473	0.0434273	AcCoAS/CG7920/Hmgs	3
GO:0009220	GO:0009220	pyrimidine ribonucleotide biosynthetic process	3/178	12/11257	0.00076994	0.0457473	0.0434273	dnk/awd/Dak1	3

## Sheet: 8hr_up_only
	ID	Description	GeneRatio	BgRatio	pvalue	p.adjust	qvalue	geneID	Count
GO:0043161	GO:0043161	proteasome-mediated ubiquitin-dependent protein catabolic process	34/498	239/11257	1.36872e-09	2.98364e-06	2.43021e-06	Prosbeta6/Rpn13/Prosalpha7/Der-1/Rpn2/CSN5/Prosbeta1/Prosalpha2/park/Prosalpha3/Prosalpha6/Rpn7/TER94/Prosalpha5/Rpn11/Prosbeta4/Ufd1-like/Rad23/Rpt4/Rpn9/Rpt6/Der-2/Su(dx)/Prosbeta7/CG31633/Rpn3/Rpn10/Rpn12/Prosalpha4/CG33144/Rpn6/Rpn1/Usp5/Rpt2	34
GO:0043632	GO:0043632	modification-dependent macromolecule catabolic process	41/498	334/11257	2.52316e-09	2.98364e-06	2.43021e-06	Prosbeta6/Rpn13/Prosalpha7/Der-1/Rpn2/CSN5/Prosbeta1/Prosalpha2/park/Prosalpha3/Prosalpha6/shrb/Rpn7/TER94/Prosalpha5/Rpn11/Prosbeta4/Ufd1-like/Rad23/Rpt4/lsn/Rpn9/Rrp45/Rpt6/ALiX/Der-2/Su(dx)/Prosbeta7/CG31633/Rrp40/Rpn3/Rpn10/Rpn12/Prosalpha4/CG33144/Rpn6/Rpn1/Usp5/Cbl/Rpt2/Vps2	41
GO:0044087	GO:0044087	regulation of cellular component biogenesis	39/498	334/11257	2.55213e-08	8.37488e-06	6.82142e-06	Src64B/ena/Arp2/spict/rictor/Arp3/Fas2/twf/nod/cpb/Ank2/SAK/CG5815/beta-Spec/LamC/Su(var)3-3/gbb/cpa/Cortactin/plum/TER94/GMF/Rae1/CG4078/Rpt4/spartin/Rpt6/SMSr/mira/htt/Rcc1/Vps33B/Spt-I/Cdc42/Arpc1/Rab8/spn-F/Usp5/Arpc5	39
GO:0007015	GO:0007015	actin filament organization	23/498	168/11257	1.31583e-06	0.000239596	0.000195153	cib/Src64B/ena/Arp2/capt/Arp3/twf/ck/cpb/LamC/cpa/sn/Cortactin/RhoGEF2/GMF/Hip1/ALiX/Cdc42/Arpc1/Pka-R1/Arpc5/mew/jvl	23
GO:0097435	GO:0097435	supramolecular fiber organization	31/498	273/11257	1.31702e-06	0.000239596	0.000195153	cib/Src64B/ena/Arp2/TBCB/Klp10A/capt/Arp3/twf/nod/ck/cpb/beta-Spec/unc-45/LamC/cpa/sn/Cortactin/RhoGEF2/GMF/Hip1/ALiX/Ten-m/Cdc42/Arpc1/Pka-R1/Arpc5/mew/CLIP-190/Patronin/jvl	31
GO:0051130	GO:0051130	positive regulation of cellular component organization	32/498	314/11257	9.0453e-06	0.00142614	0.00116161	ena/Arp2/spict/rictor/Arp3/twf/nod/cpb/Gs1/Ank2/Su(var)3-3/park/gbb/cpa/Cortactin/GMF/Ppt1/Ada2b/Rpt4/spartin/Hip1/Rpt6/mib1/htt/Cdc42/spri/Arpc1/z/shv/Arpc5/Cbl/Yip1d1	32
GO:0050807	GO:0050807	regulation of synapse organization	20/498	159/11257	2.31636e-05	0.00342387	0.00278877	Src64B/ena/Arp2/spict/rictor/Arp3/Fas2/cpb/Ank2/beta-Spec/gbb/plum/Rae1/Ada2b/spartin/Ten-m/Cdc42/Rab8/shv/Yip1d1	20
GO:0043254	GO:0043254	regulation of protein-containing complex assembly	16/498	110/11257	2.51694e-05	0.00350151	0.00285201	Arp2/Arp3/twf/nod/cpb/LamC/cpa/Cortactin/GMF/Rpt4/Rpt6/Vps33B/Cdc42/Arpc1/Usp5/Arpc5	16
GO:0016477	GO:0016477	cell migration	30/498	303/11257	3.00439e-05	0.00357771	0.00291408	Dscam1/ena/Csk/twf/cpb/Ras85D/sli/CSN5/Sema1b/oys/sn/Cortactin/Mrtf/sgl/GMF/crn/Evi5/18w/CalpB/Mulk/Cdc42/kibra/spri/apt/aop/Sply/Arpc5/Cbl/mew/fra	30
GO:0008407	GO:0008407	chaeta morphogenesis	9/498	38/11257	3.12005e-05	0.00357771	0.00291408	capt/twf/ck/emc/B-H1/sn/Arpc1/spn-F/pad	9
GO:0008582	GO:0008582	regulation of synaptic growth at neuromuscular junction	16/498	112/11257	3.16215e-05	0.00357771	0.00291408	Src64B/ena/Arp2/spict/rictor/Arp3/Fas2/cpb/Ank2/beta-Spec/gbb/plum/Rae1/spartin/Cdc42/Rab8	16
GO:0031175	GO:0031175	neuron projection development	41/498	476/11257	3.17683e-05	0.00357771	0.00291408	Dscam1/Src64B/ena/spict/dock/rictor/capt/Arp3/Fas2/twf/Ank2/beta-Spec/sli/CSN5/Sema1b/Gclc/sn/shrb/RhoGEF2/TER94/Ptp4E/Dark/dati/smo/Cont/Ppt1/Ptp10D/Fas3/GlyRS/Dlic/hdc/Ten-m/Cdc42/spri/Arpc1/HDAC1/Liprin-beta/mew/fra/Patronin/Bap55	41
GO:0034330	GO:0034330	cell junction organization	34/498	366/11257	3.38497e-05	0.00363884	0.00296387	Src64B/ena/Arp2/spict/rictor/bark/Csk/Arp3/Fas2/pasi1/cpb/Ank2/Smu1/stck/beta-Spec/gbb/plum/klg/Cont/Rae1/sinu/Ada2b/spartin/Mcr/dpr1/Lac/SH3PX1/beag/Ten-m/Cdc42/Rab8/Liprin-beta/shv/Yip1d1	34
GO:0051493	GO:0051493	regulation of cytoskeleton organization	21/498	178/11257	3.85615e-05	0.00366299	0.00298354	Src64B/ena/Arp2/rictor/Arp3/twf/nod/cpb/SAK/beta-Spec/LamC/cpa/Cortactin/RhoGEF2/sstn/GMF/Rcc1/Cdc42/Arpc1/Arpc5/Patronin	21
GO:1902903	GO:1902903	regulation of supramolecular fiber organization	16/498	114/11257	3.94951e-05	0.00366299	0.00298354	Src64B/Arp2/Arp3/twf/nod/cpb/beta-Spec/LamC/cpa/Cortactin/RhoGEF2/GMF/Cdc42/Arpc1/Arpc5/Patronin	16
GO:0043248	GO:0043248	proteasome assembly	6/498	16/11257	3.9854e-05	0.00366299	0.00298354	PSMG1/Rpn13/Rpn9/Rpn10/Rpn6/Usp5	6
GO:0030032	GO:0030032	lamellipodium assembly	7/498	23/11257	4.19885e-05	0.00366299	0.00298354	ena/Arp3/twf/cpb/cpa/SH3PX1/Cdc42	7
GO:0008064	GO:0008064	regulation of actin polymerization or depolymerization	12/498	69/11257	4.33673e-05	0.00366299	0.00298354	Src64B/Arp2/Arp3/twf/cpb/LamC/cpa/Cortactin/GMF/Cdc42/Arpc1/Arpc5	12
GO:0030832	GO:0030832	regulation of actin filament length	12/498	69/11257	4.33673e-05	0.00366299	0.00298354	Src64B/Arp2/Arp3/twf/cpb/LamC/cpa/Cortactin/GMF/Cdc42/Arpc1/Arpc5	12
GO:0071695	GO:0071695	anatomical structure maturation	21/498	180/11257	4.55515e-05	0.0037148	0.00302574	TBCB/capt/Fas2/Ras85D/CSN5/shrb/plum/TER94/Cont/Rbsn-5/lsn/hdc/CalpB/mira/sll/egl/spn-F/Pka-R1/csul/Hydr2/jvl	21
GO:0051124	GO:0051124	synaptic growth at neuromuscular junction	18/498	141/11257	4.83505e-05	0.00381163	0.00310461	Src64B/ena/Arp2/spict/rictor/Arp3/Fas2/cpb/Ank2/beta-Spec/gbb/plum/Rae1/spartin/Ten-m/Cdc42/Rab8/Liprin-beta	18
GO:0097581	GO:0097581	lamellipodium organization	7/498	24/11257	5.70354e-05	0.00421448	0.00343273	ena/Arp3/twf/cpb/cpa/SH3PX1/Cdc42	7
GO:0010591	GO:0010591	regulation of lamellipodium assembly	6/498	17/11257	5.93014e-05	0.00421448	0.00343273	ena/Arp3/twf/cpb/cpa/Cdc42	6
GO:0090066	GO:0090066	regulation of anatomical structure size	25/498	241/11257	6.47335e-05	0.00437414	0.00356278	Src64B/Arp2/spict/rictor/bark/Arp3/Fas2/twf/pasi1/cpb/Ras85D/LamC/Sema1b/cpa/Cortactin/GMF/sinu/Best1/Mcr/Lac/MAPk-Ak2/Cdc42/mio/Arpc1/Arpc5	25
GO:0034329	GO:0034329	cell junction assembly	24/498	228/11257	7.16709e-05	0.00458113	0.00373137	Src64B/ena/Arp2/spict/rictor/bark/Arp3/Fas2/pasi1/cpb/Ank2/beta-Spec/gbb/plum/Cont/Rae1/sinu/spartin/Mcr/Lac/Ten-m/Cdc42/Rab8/Liprin-beta	24
GO:0007389	GO:0007389	pattern specification process	41/498	497/11257	8.4397e-05	0.00519367	0.00423029	Myd88/ena/TBCB/GEFmeso/capt/ck/Ras85D/emc/stck/sli/CSN5/Su(var)3-3/gbb/B-H1/sn/sgl/TER94/msk/smo/Ada2b/Rbsn-5/bowl/lsn/Su(H)/Cf2/mira/Su(dx)/sll/Cdc42/egl/fuss/apt/HDAC1/spn-F/Pka-R1/csul/Cbl/mew/wls/fra/jvl	41
GO:1902743	GO:1902743	regulation of lamellipodium organization	6/498	18/11257	8.56461e-05	0.00519367	0.00423029	ena/Arp3/twf/cpb/cpa/Cdc42	6
GO:0048469	GO:0048469	cell maturation	20/498	177/11257	0.00010779	0.0060696	0.00494375	TBCB/capt/Fas2/Ras85D/CSN5/shrb/plum/TER94/Rbsn-5/lsn/hdc/CalpB/mira/sll/egl/spn-F/Pka-R1/csul/Hydr2/jvl	20
GO:1901888	GO:1901888	regulation of cell junction assembly	16/498	124/11257	0.000110733	0.0060903	0.00496061	Src64B/ena/Arp2/spict/rictor/Arp3/Fas2/cpb/Ank2/beta-Spec/gbb/plum/Rae1/spartin/Cdc42/Rab8	16
GO:0048667	GO:0048667	cell morphogenesis involved in neuron differentiation	37/498	440/11257	0.000127398	0.00663495	0.00540424	Dscam1/Src64B/ena/spict/dock/rictor/capt/Fas2/Ank2/Ras85D/beta-Spec/sli/CSN5/Sema1b/Gclc/shrb/RhoGEF2/TER94/Ptp4E/Dark/smo/Cont/Ppt1/Ptp10D/Fas3/GlyRS/Dlic/hdc/Ten-m/Cdc42/spri/Arpc1/HDAC1/Liprin-beta/mew/fra/Bap55	37
GO:0006897	GO:0006897	endocytosis	19/498	166/11257	0.00013432	0.00663495	0.00540424	CG18659/twf/Cortactin/CG32579/Rab4/rudhira/dx/Ppt1/Rbsn-5/spartin/Mcr/Hip1/mib1/Su(dx)/rush/Cdc42/spri/aop/Cbl	19
GO:0051674	GO:0051674	localization of cell	32/498	361/11257	0.000139676	0.00663495	0.00540424	Dscam1/ena/Csk/twf/cpb/Ras85D/SAK/sli/CSN5/Sema1b/oys/sn/Cortactin/Mrtf/sgl/GMF/crn/Evi5/18w/CalpB/Mulk/Cdc42/kibra/spri/apt/aop/Sply/Arpc5/Cbl/mew/fra/jvl	32
GO:0021700	GO:0021700	developmental maturation	22/498	209/11257	0.000142264	0.00663495	0.00540424	TBCB/capt/Fas2/Ras85D/CSN5/shrb/plum/TER94/Cont/Rbsn-5/lsn/hdc/CalpB/mira/sll/egl/spn-F/Pka-R1/csul/shv/Hydr2/jvl	22
GO:0032970	GO:0032970	regulation of actin filament-based process	15/498	115/11257	0.000159527	0.00663495	0.00540424	Src64B/ena/Arp2/rictor/Arp3/twf/cpb/LamC/cpa/Cortactin/RhoGEF2/GMF/Cdc42/Arpc1/Arpc5	15
GO:0048858	GO:0048858	cell projection morphogenesis	37/498	445/11257	0.000160171	0.00663495	0.00540424	Dscam1/Src64B/ena/spict/dock/rictor/capt/Fas2/Ank2/beta-Spec/sli/CSN5/Sema1b/Gclc/sn/shrb/RhoGEF2/TER94/Ptp4E/Dark/smo/Cont/Ppt1/Ptp10D/Fas3/GlyRS/Dlic/hdc/Ten-m/Cdc42/spri/Arpc1/HDAC1/Liprin-beta/mew/fra/Bap55	37
GO:0120039	GO:0120039	plasma membrane bounded cell projection morphogenesis	37/498	445/11257	0.000160171	0.00663495	0.00540424	Dscam1/Src64B/ena/spict/dock/rictor/capt/Fas2/Ank2/beta-Spec/sli/CSN5/Sema1b/Gclc/sn/shrb/RhoGEF2/TER94/Ptp4E/Dark/smo/Cont/Ppt1/Ptp10D/Fas3/GlyRS/Dlic/hdc/Ten-m/Cdc42/spri/Arpc1/HDAC1/Liprin-beta/mew/fra/Bap55	37
GO:0048589	GO:0048589	developmental growth	32/498	364/11257	0.000162718	0.00663495	0.00540424	Dscam1/Src64B/ena/Arp2/spict/rictor/Csk/Arp3/Fas2/cpb/Ank2/Ras85D/Sep2/beta-Spec/Plod/gbb/Sema1b/RhoGEF2/plum/Rae1/Ac76E/18w/spartin/Wbp2/hdc/Ten-m/Cdc42/kibra/spri/Rab8/Liprin-beta/CycY	32
GO:0043087	GO:0043087	regulation of GTPase activity	13/498	92/11257	0.000192937	0.00748026	0.00609275	CenB1A/Pax/CG9135/CG1116/Evi5/RN-tre/Tbc1d15-17/RanGAP/CG42795/Asap/CG7742/drongo/Dhit	13
GO:0051960	GO:0051960	regulation of nervous system development	32/498	369/11257	0.000208776	0.0079638	0.0064866	Dscam1/Src64B/ena/Arp2/spict/rictor/Arp3/Fas2/twf/cpb/Ank2/Ras85D/beta-Spec/gbb/Sema1b/RhoGEF2/plum/Rae1/Ppt1/spartin/Dlic/hdc/Rcc1/Cdc42/kibra/HDAC1/aop/Rab8/spn-F/shv/barc/fra	32
GO:0006289	GO:0006289	nucleotide-excision repair	7/498	29/11257	0.000212179	0.00796512	0.00648767	DNApol-epsilon255/DNApol-delta/DNApol-theta/Rad23/mei-9/Xpd/Tfb4	7
GO:0046513	GO:0046513	ceramide biosynthetic process	5/498	14/11257	0.00023843	0.00858763	0.00699471	GlcT/SMSr/Mulk/Spt-I/CG6962	5
GO:0050803	GO:0050803	regulation of synapse structure or activity	20/498	190/11257	0.00028253	0.00982622	0.00800355	Src64B/ena/Arp2/spict/rictor/Arp3/Fas2/cpb/Ank2/beta-Spec/gbb/plum/Rae1/Ada2b/spartin/Ten-m/Cdc42/Rab8/shv/Yip1d1	20
GO:0046329	GO:0046329	negative regulation of JNK cascade	6/498	22/11257	0.000295932	0.0100029	0.00814749	cpb/stck/park/cpa/ics/Usp5	6
GO:0032535	GO:0032535	regulation of cellular component size	19/498	178/11257	0.000333669	0.0111145	0.00905285	Src64B/Arp2/spict/rictor/Arp3/twf/cpb/Ras85D/LamC/Sema1b/cpa/Cortactin/GMF/Best1/MAPk-Ak2/Cdc42/mio/Arpc1/Arpc5	19
GO:0030029	GO:0030029	actin filament-based process	28/498	316/11257	0.000363902	0.0119532	0.00973598	cib/Src64B/ena/Arp2/rictor/capt/Arp3/twf/ck/cpb/unc-45/LamC/cpa/sn/Cortactin/RhoGEF2/CG32982/Mrtf/GMF/Hip1/ALiX/blow/Cdc42/Arpc1/Pka-R1/Arpc5/mew/jvl	28
GO:0070303	GO:0070303	negative regulation of stress-activated protein kinase signaling cascade	6/498	24/11257	0.000495067	0.0152056	0.0123851	cpb/stck/park/cpa/ics/Usp5	6
GO:0048638	GO:0048638	regulation of developmental growth	22/498	229/11257	0.000517979	0.0155066	0.0126303	Src64B/ena/Arp2/spict/rictor/Csk/Arp3/Fas2/cpb/Ank2/Ras85D/beta-Spec/gbb/Sema1b/plum/Rae1/Ac76E/spartin/Wbp2/Cdc42/kibra/Rab8	22
GO:0007424	GO:0007424	open tracheal system development	23/498	245/11257	0.000540034	0.0157674	0.0128427	Src64B/stac/bark/Fas2/pasi1/Ras85D/sli/Trf2/RhoGEF2/Mrtf/sgl/Ptp4E/sinu/Ptp10D/Dlic/Mcr/hdc/Membrin/Lac/Cdc42/apt/aop/mew	23
GO:0006643	GO:0006643	membrane lipid metabolic process	13/498	102/11257	0.000540524	0.0157674	0.0128427	PIG-V/GlcAT-S/CG6660/cert/GlcT/SMSr/PIG-N/Mulk/Spt-I/PIG-F/CG6962/Sply/PIG-U	13
GO:0007163	GO:0007163	establishment or maintenance of cell polarity	20/498	200/11257	0.000552139	0.0157674	0.0128427	TBCB/rictor/Klp10A/capt/Csk/nod/Ras85D/Lap1/sn/msk/Cont/Rbsn-5/htt/Cdc42/egl/aop/spn-F/Pka-R1/Cbl/jvl	20
GO:0000278	GO:0000278	mitotic cell cycle	38/498	492/11257	0.000567425	0.0157674	0.0128427	Act42A/luna/Klp10A/larp/DNApol-epsilon255/JMJD5/eco/Sep2/Hrb87F/SAK/mst/l(3)mbt/Dis3/Syx13/shrb/png/smo/dpa/Rae1/tefu/MCPH1/Sf3a1/Dlic/Su(H)/ALiX/htt/Rcc1/SH3PX1/Asap/beag/Top2/Xpd/Rpn10/alphaTub84B/Mcm6/Tap42/Patronin/Bap55	38
GO:0030707	GO:0030707	ovarian follicle cell development	27/498	309/11257	0.00057336	0.0157674	0.0128427	Src64B/ena/twf/cpb/Ras85D/emc/Prosalpha7/Pax/gbb/okr/Cortactin/Mrtf/GMF/smo/Rab4/18w/Rpt4/CalpB/Cf2/Cdc42/kibra/spri/apt/aop/Mcm6/Cbl/jvl	27
GO:0002066	GO:0002066	columnar/cuboidal epithelial cell development	27/498	310/11257	0.000602689	0.0163835	0.0133445	Src64B/ena/twf/cpb/Ras85D/emc/Prosalpha7/Pax/gbb/okr/Cortactin/Mrtf/GMF/smo/Rab4/18w/Rpt4/CalpB/Cf2/Cdc42/kibra/spri/apt/aop/Mcm6/Cbl/jvl	27
GO:0098586	GO:0098586	cellular response to virus	4/498	10/11257	0.000642125	0.0171521	0.0139706	FoxK/Dcr-2/TER94/Ufd1-like	4
GO:0040007	GO:0040007	growth	34/498	429/11257	0.000700692	0.017807	0.014504	Dscam1/Src64B/ena/Arp2/spict/rictor/Csk/Arp3/Fas2/cpb/Ank2/Ras85D/Sep2/beta-Spec/Plod/gbb/Sema1b/RhoGEF2/plum/Wdr24/Rae1/Ac76E/18w/spartin/Wbp2/hdc/Ten-m/Cdc42/kibra/spri/Rab8/Liprin-beta/spidey/CycY	34
GO:0048585	GO:0048585	negative regulation of response to stimulus	31/498	379/11257	0.000711938	0.017807	0.014504	spict/dock/Fas2/cpb/fz4/Ras85D/stck/unc-45/park/Sema1b/cpa/TER94/ics/Ptp4E/Dark/tefu/dx/Ufd1-like/Ptp10D/spartin/Su(H)/Su(dx)/fuss/apt/HDAC1/aop/spidey/Pka-R1/PRAS40/Usp5/Cbl	31
GO:0010648	GO:0010648	negative regulation of cell communication	29/498	351/11257	0.000895731	0.021398	0.0174289	spict/dock/Fas2/cpb/Ank2/fz4/Ras85D/stck/park/cpa/TER94/ics/Ptp4E/tefu/dx/Ufd1-like/Ptp10D/spartin/Su(H)/Su(dx)/fuss/apt/HDAC1/aop/spidey/Pka-R1/PRAS40/Usp5/Cbl	29
GO:0030100	GO:0030100	regulation of endocytosis	9/498	58/11257	0.0009286	0.0218163	0.0177696	Cortactin/Rab4/Ppt1/Rbsn-5/spartin/Hip1/mib1/spri/Cbl	9
GO:0023057	GO:0023057	negative regulation of signaling	29/498	352/11257	0.000936686	0.0218163	0.0177696	spict/dock/Fas2/cpb/Ank2/fz4/Ras85D/stck/park/cpa/TER94/ics/Ptp4E/tefu/dx/Ufd1-like/Ptp10D/spartin/Su(H)/Su(dx)/fuss/apt/HDAC1/aop/spidey/Pka-R1/PRAS40/Usp5/Cbl	29
GO:0035220	GO:0035220	wing disc development	30/498	372/11257	0.00108337	0.0241714	0.0196879	GEFmeso/capt/ck/cpb/Ras85D/emc/stck/Su(var)3-3/Pax/gbb/Gclc/cpa/sn/RhoGEF2/Mrtf/ics/msk/smo/dx/Ada2b/Rbsn-5/bowl/Su(H)/Su(dx)/Cdc42/fuss/Cbl/mew/wls/Tap42	30
GO:0045005	GO:0045005	DNA-dependent DNA replication maintenance of fidelity	5/498	19/11257	0.00115235	0.0254702	0.0207458	tam/DNApol-epsilon255/DNApol-delta/DNApol-theta/Rif1	5
GO:0090287	GO:0090287	regulation of cellular response to growth factor stimulus	9/498	60/11257	0.00119214	0.0257648	0.0209857	Src64B/spict/Ptp4E/sotv/Ptp10D/spartin/fuss/PRAS40/fra	9
GO:0051261	GO:0051261	protein depolymerization	7/498	38/11257	0.00121536	0.0257648	0.0209857	Klp10A/twf/cpb/beta-Spec/cpa/Usp5/Patronin	7
GO:0045595	GO:0045595	regulation of cell differentiation	33/498	426/11257	0.00123105	0.0257648	0.0209857	Dscam1/Src64B/spict/rictor/Fas2/twf/mspo/Ras85D/stck/CSN5/Pax/gbb/Sema1b/l(3)mbt/RhoGEF2/TER94/Dark/smo/Ppt1/Dlic/hdc/Su(H)/mira/Rcc1/Cdc42/kibra/spri/HDAC1/aop/spn-F/Cbl/barc/fra	33
GO:0001932	GO:0001932	regulation of protein phosphorylation	20/498	214/11257	0.00128815	0.0267234	0.0217665	Src64B/cpb/CG14408/Ras85D/stck/park/gbb/cpa/ics/ALiX/CycH/CG7044/MAPk-Ak2/Cdc42/CycY/Pka-R1/PRAS40/SNF4Agamma/Usp5/Cbl	20
GO:0009886	GO:0009886	post-embryonic animal morphogenesis	34/498	445/11257	0.00131908	0.0271271	0.0220953	cib/GEFmeso/Fas2/ck/Ras85D/emc/stck/Trf2/Su(var)3-3/gbb/B-H1/Gclc/Dif/sn/RhoGEF2/Mrtf/TER94/ics/Dark/msk/smo/Rbsn-5/bowl/hdc/Su(H)/Su(dx)/DCAF12/Cdc42/egl/fuss/Cbl/mew/wls/Tap42	34
GO:0098609	GO:0098609	cell-cell adhesion	14/498	127/11257	0.00144175	0.0281797	0.0229527	Src64B/Fas2/stck/sli/plum/wech/klg/Cont/Rab4/Fas3/Lac/Ten-m/aop/mew	14
GO:0048284	GO:0048284	organelle fusion	10/498	74/11257	0.00147644	0.0286212	0.0233122	Gs1/park/Bet1/Syx13/TER94/Rbsn-5/Membrin/CG6512/Vps33B/Rab8	10
GO:0070848	GO:0070848	response to growth factor	12/498	100/11257	0.00149333	0.0287132	0.0233872	Src64B/spict/Ras85D/gbb/Ptp4E/sotv/Ptp10D/spartin/fuss/aop/PRAS40/fra	12
GO:0061024	GO:0061024	membrane organization	21/498	234/11257	0.00164012	0.030978	0.0252319	PIG-V/Arp3/beta-Spec/Bet1/Syx13/oys/shrb/CG32579/sstn/TER94/cert/Rbsn-5/Membrin/Rtnl1/Asap/CG6512/CG32022/Ten-m/Vps33B/Rab8/Miro	21
GO:0043242	GO:0043242	negative regulation of protein-containing complex disassembly	5/498	21/11257	0.00187424	0.0328085	0.0267228	twf/cpb/beta-Spec/cpa/Patronin	5
GO:1901880	GO:1901880	negative regulation of protein depolymerization	5/498	21/11257	0.00187424	0.0328085	0.0267228	twf/cpb/beta-Spec/cpa/Patronin	5
GO:0071027	GO:0071027	nuclear RNA surveillance	4/498	13/11257	0.00196616	0.033214	0.0270532	su(sable)/Dis3/Rrp45/Rrp40	4
GO:0007274	GO:0007274	neuromuscular synaptic transmission	10/498	77/11257	0.00200352	0.0334607	0.0272541	twf/Ank2/Smu1/beta-Spec/gbb/beag/Ten-m/Cdc42/apt/Pka-R1	10
GO:0050790	GO:0050790	regulation of catalytic activity	29/498	370/11257	0.00200906	0.0334607	0.0272541	Src64B/capt/CG14408/Ras85D/CenB1A/Pax/CG9135/CG1116/ics/Evi5/Dark/RN-tre/CG13551/aph-1/Tbc1d15-17/RanGAP/CycH/CG42795/Asap/Cdc42/CG7742/Fem-1/CycY/drongo/PRAS40/SNF4Agamma/Dhit/Cbl/Atg14	29
GO:0042325	GO:0042325	regulation of phosphorylation	22/498	256/11257	0.00222737	0.0353766	0.0288146	Src64B/rictor/cpb/CG14408/Ras85D/stck/park/gbb/cpa/ics/ALiX/CycH/CG7044/MAPk-Ak2/Cdc42/CycY/Pka-R1/PRAS40/SNF4Agamma/Usp5/Cbl/Atg14	22
GO:0045448	GO:0045448	mitotic cell cycle, embryonic	7/498	42/11257	0.0022306	0.0353766	0.0288146	luna/larp/SAK/l(3)mbt/png/MCPH1/Xpd	7
GO:0044419	GO:0044419	interspecies interaction between organisms	34/498	464/11257	0.00263062	0.0387926	0.0315969	upd3/Myd88/Wsck/Dscam1/Src64B/subdued/gb/Ras85D/unc-45/Mvb12/FoxK/CG14411/Dcr-2/Dis3/Dif/Rab14/Hat1/GILT1/TER94/ClC-b/Uba2/Dark/CG13551/tefu/Ufd1-like/18w/Mcr/EMRE/Dci/GNBP1/Der-2/Vps33B/Tab2/Cdc42	34
GO:0007472	GO:0007472	wing disc morphogenesis	23/498	277/11257	0.00277667	0.039799	0.0324166	GEFmeso/ck/Ras85D/emc/stck/Su(var)3-3/gbb/Gclc/sn/RhoGEF2/Mrtf/ics/msk/smo/Rbsn-5/Su(H)/Su(dx)/Cdc42/fuss/Cbl/mew/wls/Tap42	23
GO:0010256	GO:0010256	endomembrane system organization	16/498	166/11257	0.00279444	0.0398124	0.0324276	PIG-V/Arp3/beta-Spec/oys/ReepB/CG32579/sstn/TER94/lsn/opm/Tango2/Rtnl1/Asap/rush/CG32022/Ten-m	16
GO:0001700	GO:0001700	embryonic development via the syncytial blastoderm	16/498	167/11257	0.00296825	0.0408134	0.0332429	upd3/ena/Arp3/Ras85D/emc/stck/gbb/Sema1b/l(3)mbt/RhoGEF2/sinu/Rif1/Mcr/Cdc42/Arpc1/aop	16
GO:0051093	GO:0051093	negative regulation of developmental process	18/498	199/11257	0.00315342	0.0428611	0.0349108	Src64B/ena/spict/Csk/Fas2/Ras85D/CSN5/park/Sema1b/plum/Rae1/Ac76E/spartin/hdc/Su(H)/kibra/HDAC1/aop	18
GO:0008298	GO:0008298	intracellular mRNA localization	10/498	82/11257	0.0032106	0.043389	0.0353408	okr/TER94/Rbsn-5/lsn/mira/Rrp40/egl/spn-F/csul/jvl	10
GO:0051241	GO:0051241	negative regulation of multicellular organismal process	17/498	184/11257	0.00326271	0.0438426	0.0357103	Src64B/ena/spict/Csk/Fas2/Ras85D/CSN5/Sema1b/plum/Rae1/Ac76E/spartin/hdc/Su(H)/kibra/HDAC1/aop	17
GO:0090132	GO:0090132	epithelium migration	16/498	169/11257	0.00334275	0.0442522	0.0360438	ena/twf/cpb/Ras85D/sli/Cortactin/Mrtf/sgl/GMF/18w/CalpB/kibra/spri/apt/aop/Cbl	16
GO:0030335	GO:0030335	positive regulation of cell migration	8/498	57/11257	0.00339379	0.0442522	0.0360438	Dscam1/ena/sli/Sema1b/spri/aop/Cbl/fra	8
GO:0046058	GO:0046058	cAMP metabolic process	4/498	15/11257	0.00349817	0.0449163	0.0365847	Ac78C/CG43373/Pde11/Ac76E	4
GO:0022610	GO:0022610	biological adhesion	19/498	217/11257	0.003528	0.0449163	0.0365847	Src64B/Fas2/mspo/stck/sli/plum/wech/klg/Cont/Rab4/sinu/18w/Fas3/Lac/Pgant3/Ten-m/Arpc1/aop/mew	19
GO:0007254	GO:0007254	JNK cascade	9/498	70/11257	0.00355152	0.0449163	0.0365847	cpb/stck/park/cpa/ics/ALiX/MAPk-Ak2/Cdc42/Usp5	9
GO:0009607	GO:0009607	response to biotic stimulus	33/498	457/11257	0.00379433	0.0472294	0.0384688	upd3/Myd88/Wsck/Dscam1/Src64B/subdued/gb/Ras85D/unc-45/FoxK/CG14411/Dcr-2/Dis3/Dif/Rab14/Hat1/GILT1/TER94/ClC-b/Uba2/Dark/CG13551/tefu/Ufd1-like/18w/Mcr/EMRE/Dci/GNBP1/Der-2/Vps33B/Tab2/Cdc42	33
GO:0040008	GO:0040008	regulation of growth	24/498	301/11257	0.00382686	0.047385	0.0385955	Src64B/ena/Arp2/spict/rictor/Csk/Arp3/Fas2/cpb/Ank2/Ras85D/beta-Spec/gbb/Sema1b/plum/Wdr24/Rae1/Ac76E/spartin/Wbp2/Cdc42/kibra/Rab8/spidey	24

## Sheet: D15_up_only
	ID	Description	GeneRatio	BgRatio	pvalue	p.adjust	qvalue	geneID	Count
GO:0044093	GO:0044093	positive regulation of molecular function	3/22	233/11257	8.48972e-05	0.00882931	0.00500447	Hsf/CG5608/Ccz1	3
GO:0009408	GO:0009408	response to heat	2/22	81/11257	0.000504267	0.0196475	0.0111363	Hsf/CIA30	2
GO:0008610	GO:0008610	lipid biosynthetic process	2/22	233/11257	0.00409371	0.0635206	0.0360036	CG5608/FASN2	2
GO:0008333	GO:0008333	endosome to lysosome transport	1/22	13/11257	0.00576189	0.0635206	0.0360036	Ccz1	1
GO:0071322	GO:0071322	cellular response to carbohydrate stimulus	1/22	17/11257	0.00752942	0.0635206	0.0360036	FASN2	1
GO:0010257	GO:0010257	NADH dehydrogenase complex assembly	1/22	19/11257	0.00841224	0.0635206	0.0360036	CIA30	1
GO:0032981	GO:0032981	mitochondrial respiratory chain complex I assembly	1/22	19/11257	0.00841224	0.0635206	0.0360036	CIA30	1
GO:0009744	GO:0009744	response to sucrose	1/22	21/11257	0.00929444	0.0635206	0.0360036	FASN2	1
GO:0034285	GO:0034285	response to disaccharide	1/22	22/11257	0.0097353	0.0635206	0.0360036	FASN2	1
GO:0044255	GO:0044255	cellular lipid metabolic process	2/22	385/11257	0.0108936	0.0635206	0.0360036	CG5608/FASN2	2
GO:0032509	GO:0032509	endosome transport via multivesicular body sorting pathway	1/22	27/11257	0.0119373	0.0635206	0.0360036	Ccz1	1
GO:0071985	GO:0071985	multivesicular body sorting pathway	1/22	27/11257	0.0119373	0.0635206	0.0360036	Ccz1	1
GO:0007041	GO:0007041	lysosomal transport	1/22	28/11257	0.0123772	0.0635206	0.0360036	Ccz1	1
GO:0006120	GO:0006120	mitochondrial electron transport, NADH to ubiquinone	1/22	38/11257	0.0167678	0.0758195	0.0429746	CIA30	1
GO:0006661	GO:0006661	phosphatidylinositol biosynthetic process	1/22	44/11257	0.0193946	0.0840434	0.0476359	CG5608	1
GO:0050832	GO:0050832	defense response to fungus	1/22	55/11257	0.0241959	0.0911315	0.0516535	Hsf	1
GO:0001666	GO:0001666	response to hypoxia	1/22	62/11257	0.0272415	0.0911315	0.0516535	CIA30	1
GO:0043547	GO:0043547	positive regulation of GTPase activity	1/22	64/11257	0.0281103	0.0911315	0.0516535	Ccz1	1
GO:0033674	GO:0033674	positive regulation of kinase activity	1/22	66/11257	0.0289784	0.0911315	0.0516535	CG5608	1
GO:0009620	GO:0009620	response to fungus	1/22	67/11257	0.0294123	0.0911315	0.0516535	Hsf	1
GO:0006633	GO:0006633	fatty acid biosynthetic process	1/22	70/11257	0.0307129	0.0911315	0.0516535	FASN2	1
GO:0072330	GO:0072330	monocarboxylic acid biosynthetic process	1/22	76/11257	0.0333099	0.0911315	0.0516535	FASN2	1
GO:0046488	GO:0046488	phosphatidylinositol metabolic process	1/22	87/11257	0.0380566	0.0942353	0.0534127	CG5608	1
GO:0043087	GO:0043087	regulation of GTPase activity	1/22	92/11257	0.040208	0.0949115	0.053796	Ccz1	1

## Sheet: D30_up_only
	ID	Description	GeneRatio	BgRatio	pvalue	p.adjust	qvalue	geneID	Count
GO:0042254	GO:0042254	ribosome biogenesis	18/296	216/11257	1.55588e-05	0.0120886	0.0107058	Fib/CG13096/RpS5b/pit/RpLP0-like/CG7544/CG8064/CG6712/RpL24-like/CG12301/Dbp21E2/RpS15/CG7839/CG4022/RpS28b/CG13097/l(3)07882/RpS21	18
GO:0009161	GO:0009161	ribonucleoside monophosphate metabolic process	6/296	22/11257	1.64322e-05	0.0120886	0.0107058	Gart/Pfas/CG11089/Prps/veil/Paics	6
GO:0009123	GO:0009123	nucleoside monophosphate metabolic process	6/296	25/11257	3.6492e-05	0.0120886	0.0107058	Gart/Pfas/CG11089/Prps/veil/Paics	6
GO:0042440	GO:0042440	pigment metabolic process	12/296	112/11257	3.6936e-05	0.0120886	0.0107058	Gart/Pfas/CG34423/v/Uros1/Shmt/egr/EMC3/Rac2/dl/Rho1/Spn27A	12
GO:0009126	GO:0009126	purine nucleoside monophosphate metabolic process	5/296	16/11257	4.18292e-05	0.0120886	0.0107058	Gart/Pfas/CG11089/veil/Paics	5
GO:0009156	GO:0009156	ribonucleoside monophosphate biosynthetic process	5/296	16/11257	4.18292e-05	0.0120886	0.0107058	Gart/Pfas/CG11089/Prps/Paics	5
GO:0009167	GO:0009167	purine ribonucleoside monophosphate metabolic process	5/296	16/11257	4.18292e-05	0.0120886	0.0107058	Gart/Pfas/CG11089/veil/Paics	5
GO:0006952	GO:0006952	defense response	25/296	411/11257	8.35599e-05	0.0193035	0.0170953	Pvf2/Myo61F/insc/PGRP-SD/CG7408/GILT2/Tep1/BomS3/Dro/egr/CG9008/FMRFaR/inv/krz/Rel/Rac2/vir-1/BomS5/Charon/dl/nub/Dsp1/Rho1/Spn27A/wisp	25
GO:0006364	GO:0006364	rRNA processing	13/296	142/11257	9.22396e-05	0.0193035	0.0170953	Fib/CG13096/pit/RpLP0-like/CG7544/CG8064/CG6712/CG12301/CG4022/RpS28b/CG13097/l(3)07882/RpS21	13
GO:0002376	GO:0002376	immune system process	26/296	444/11257	0.000112161	0.0193035	0.0170953	InR/Pvf2/PGRP-SD/Tep1/lz/BomS3/Dro/sty/egr/Ser/smt3/CG9008/Galphaq/Rel/Rac2/vir-1/Charon/dl/nub/CG1572/Kr/Dsp1/Rho1/RpS21/Spn27A/wisp	26
GO:0050848	GO:0050848	regulation of calcium-mediated signaling	4/296	11/11257	0.000133588	0.0193035	0.0170953	TrpA1/Nox/Lst/olf186-F	4
GO:0016072	GO:0016072	rRNA metabolic process	13/296	149/11257	0.000150405	0.0202846	0.0179641	Fib/CG13096/pit/RpLP0-like/CG7544/CG8064/CG6712/CG12301/CG4022/RpS28b/CG13097/l(3)07882/RpS21	13
GO:0035107	GO:0035107	appendage morphogenesis	20/296	321/11257	0.000316257	0.0376346	0.0333294	qua/grk/sog/ctp/Usp8/sd/lz/tow/sty/Ser/f/inv/vri/myo/nub/Dok/tx/dysf/lft/Rho1	20
GO:0006575	GO:0006575	cellular modified amino acid metabolic process	9/296	85/11257	0.000380162	0.0404389	0.0358129	Sardh/Gnmt/CG8665/Ahcy/Shmt/CG9547/GstD10/GstE1/Eip55E	9
GO:0042219	GO:0042219	cellular modified amino acid catabolic process	4/296	14/11257	0.000380662	0.0404389	0.0358129	Sardh/CG8665/Ahcy/CG9547	4
GO:0002833	GO:0002833	positive regulation of response to biotic stimulus	10/296	104/11257	0.000399792	0.0404389	0.0358129	Pvf2/PGRP-SD/GILT2/Dro/smt3/Rel/Charon/dl/Dsp1/wisp	10
GO:1900426	GO:1900426	positive regulation of defense response to bacterium	6/296	40/11257	0.000567809	0.0522126	0.0462398	PGRP-SD/GILT2/Dro/Rel/Charon/wisp	6
GO:0007476	GO:0007476	imaginal disc-derived wing morphogenesis	17/296	265/11257	0.000637169	0.0560431	0.0496321	qua/grk/sog/ctp/Usp8/sd/tow/sty/Ser/f/inv/vri/myo/Dok/tx/lft/Rho1	17
GO:0098542	GO:0098542	defense response to other organism	22/296	396/11257	0.000771867	0.0624594	0.0553144	Pvf2/Myo61F/insc/PGRP-SD/CG7408/GILT2/Tep1/BomS3/Dro/egr/CG9008/inv/Rel/Rac2/vir-1/Charon/dl/nub/Dsp1/Rho1/Spn27A/wisp	22
GO:0002682	GO:0002682	regulation of immune system process	15/296	227/11257	0.000974125	0.0658799	0.0583435	Pvf2/lz/Dro/Ser/smt3/Rel/Rac2/Charon/dl/nub/CG1572/Kr/Dsp1/Spn27A/wisp	15
GO:0072521	GO:0072521	purine-containing compound metabolic process	14/296	204/11257	0.000992212	0.0658799	0.0583435	Gnmt/Ahcy/Gart/Pfas/v/CG11089/Shmt/CG9547/Hex-C/CG8303/Prps/veil/ATP6/Paics	14
GO:0070050	GO:0070050	neuron cellular homeostasis	5/296	30/11257	0.00100907	0.0658799	0.0583435	bgm/egr/Galphaq/ATP6/Gba1b	5
GO:0002920	GO:0002920	regulation of humoral immune response	8/296	79/11257	0.00107466	0.0658799	0.0583435	Pvf2/Dro/smt3/Rel/dl/nub/Dsp1/wisp	8
GO:1901605	GO:1901605	alpha-amino acid metabolic process	9/296	99/11257	0.00116079	0.0683998	0.0605752	Sardh/Gnmt/Ahcy/CG1673/v/CG3999/Shmt/CG9547/Eip55E	9
GO:0071897	GO:0071897	DNA biosynthetic process	6/296	46/11257	0.0012144	0.0683998	0.0605752	RecQ4/Cdc7/geminin/cutlet/DNAlig1/mip40	6
GO:0044419	GO:0044419	interspecies interaction between organisms	24/296	464/11257	0.0012172	0.0683998	0.0605752	Pvf2/CG14812/Myo61F/insc/PGRP-SD/CG7408/GILT2/Tep1/BomS3/Dro/egr/smt3/CG9008/inv/Rel/Rac2/vir-1/Charon/dl/nub/Dsp1/Rho1/Spn27A/wisp	24
GO:0044242	GO:0044242	cellular lipid catabolic process	8/296	82/11257	0.00137197	0.0711727	0.0630309	CG7997/Pepck2/CG9547/Jhe/Sik3/CG11619/Gba1b/bmm	8
GO:0032101	GO:0032101	regulation of response to external stimulus	15/296	235/11257	0.00137997	0.0711727	0.0630309	Pvf2/PGRP-SD/GILT2/Dro/smt3/Galphaq/rdgB/krz/Rel/Charon/dl/nub/Dsp1/Spn27A/wisp	15
GO:0007307	GO:0007307	eggshell chorion gene amplification	4/296	20/11257	0.00162673	0.077933	0.0690178	RecQ4/Cdc7/geminin/mip40	4
GO:0006955	GO:0006955	immune response	17/296	291/11257	0.00177775	0.077933	0.0690178	Pvf2/PGRP-SD/Tep1/BomS3/Dro/egr/smt3/Galphaq/Rel/Rac2/Charon/dl/nub/Dsp1/Rho1/Spn27A/wisp	17
GO:0048934	GO:0048934	peripheral nervous system neuron differentiation	3/296	10/11257	0.00188266	0.077933	0.0690178	Rel/dl/dila	3
GO:0048935	GO:0048935	peripheral nervous system neuron development	3/296	10/11257	0.00188266	0.077933	0.0690178	Rel/dl/dila	3
GO:0060211	GO:0060211	regulation of nuclear-transcribed mRNA poly(A) tail shortening	3/296	10/11257	0.00188266	0.077933	0.0690178	spn-E/AGO3/Rpb7	3
GO:0060213	GO:0060213	positive regulation of nuclear-transcribed mRNA poly(A) tail shortening	3/296	10/11257	0.00188266	0.077933	0.0690178	spn-E/AGO3/Rpb7	3
GO:1901606	GO:1901606	alpha-amino acid catabolic process	6/296	50/11257	0.0018872	0.077933	0.0690178	Sardh/Ahcy/v/CG3999/Shmt/CG9547	6
GO:0045229	GO:0045229	external encapsulating structure organization	8/296	87/11257	0.0020094	0.0788476	0.0698278	grk/spn-E/RecQ4/Cdc7/smt3/geminin/Rac2/mip40	8
GO:0031349	GO:0031349	positive regulation of defense response	8/296	88/11257	0.00216108	0.0788476	0.0698278	Pvf2/PGRP-SD/GILT2/Dro/Rel/Charon/Dsp1/wisp	8
GO:0042060	GO:0042060	wound healing	8/296	88/11257	0.00216108	0.0788476	0.0698278	InR/Idgf1/CG11089/lz/EMC3/Rac2/kst/Rho1	8
GO:0009607	GO:0009607	response to biotic stimulus	23/296	457/11257	0.00218263	0.0788476	0.0698278	Pvf2/Myo61F/insc/PGRP-SD/CG7408/GILT2/Tep1/BomS3/Dro/egr/smt3/CG9008/inv/Rel/Rac2/vir-1/Charon/dl/nub/Dsp1/Rho1/Spn27A/wisp	23
GO:0007392	GO:0007392	initiation of dorsal closure	3/296	11/11257	0.00253856	0.0827944	0.0733232	Rac2/Dok/Rho1	3
GO:0048563	GO:0048563	post-embryonic animal organ morphogenesis	20/296	383/11257	0.00275247	0.0836028	0.0740391	qua/Myo61F/grk/sog/ctp/Usp8/sd/tow/sty/Ser/f/inv/vri/ImpE1/myo/Dok/tx/dysf/lft/Rho1	20
GO:0009950	GO:0009950	dorsal/ventral axis specification	7/296	72/11257	0.00276696	0.0836028	0.0740391	grk/spn-E/sog/sty/dl/sel/ea	7
GO:0042255	GO:0042255	ribosome assembly	6/296	54/11257	0.00281018	0.0836028	0.0740391	RpS5b/RpLP0-like/RpL24-like/Dbp21E2/RpS15/RpS28b	6
