# Supplementary material for: Aging and Light Stress Result in Overlapping and Unique Gene Expression Changes in Photoreceptors
Source: Genes (Basel). 2022 Jan 29;13(2):264. doi: 10.3390/genes13020264 (PMC8872477; doi:10.3390/genes13020264)
Supplement: Supplementary file 1 [file genes-13-00264-s001.zip › Table S4.xlsx]

## Sheet: 3h_down_only
	ID	Description	GeneRatio	BgRatio	pvalue	p.adjust	qvalue	geneID	Count
GO:0034470	GO:0034470	ncRNA processing	50/559	258/11257	4.08655e-17	9.84858e-14	8.02684e-14	RIOK1/nop5/l(2)k09022/CG12325/CG9253/CG2260/CG5033/CG1785/CG5800/Tsr1/Nopp140/Nop60B/CG6724/CG32075/l(3)07882/CG10189/CG8939/cbc/CG1463/CG7728/l(1)G0020/defl/CG8064/Mtr4/Rexo5/Fib/CG2911/Rrp6/CG3735/CG7009/CG6550/CG9799/IntS1/Rtc1/CG11030/Elp3/CG9107/Rpp21/CG7544/Archease/IntS11/CG8545/CG8078/Nbr/IntS3/CG3071/Dcr-1/Nnp-1/CG7275/CG18048	50
GO:0042254	GO:0042254	ribosome biogenesis	44/559	216/11257	5.03122e-16	4.04175e-13	3.29413e-13	RIOK1/CG33158/nop5/l(2)k09022/CG12325/CG9253/Nle/CG2260/CG5033/CG1785/CG5800/Tsr1/Nopp140/Nop60B/CG6724/CG32075/l(2)k09848/Mys45A/l(3)07882/CG9246/CG8939/Surf6/CG1463/CG7728/l(1)G0020/mbm/CG8064/Mtr4/Rexo5/Fib/CG7839/Rrp6/CG3735/CG9799/Rtc1/CG11030/CG9107/CG7544/CG8545/CG3071/Mybbp1A/Nnp-1/Tor/CG7275	44
GO:0061564	GO:0061564	axon development	45/559	348/11257	2.98779e-09	1.02865e-06	8.38379e-07	TBCD/CG44153/stan/Dscam3/acj6/beat-VI/Dscam4/zfh1/E(z)/DIP-gamma/Src64B/NiPp1/Src42A/CadN2/Akt1/beat-IIa/kra/Dscam2/sli/enok/egh/LIMK1/Cul3/WASp/Alk/nvy/DCTN1-p150/Elp3/RhoGEF2/side/Nrg/Arp3/ago/CkIIalpha/Archease/Liprin-alpha/robo3/kuz/beat-Ic/velo/bsk/beat-IIb/otk/Tor/Cdc42	45
GO:0048858	GO:0048858	cell projection morphogenesis	50/559	445/11257	4.3957e-08	8.14894e-06	6.64159e-06	TBCD/CG44153/stan/Dscam3/acj6/beat-VI/Dscam4/shn/zfh1/Lrrk/E(z)/DIP-gamma/Src64B/NiPp1/Src42A/CadN2/beat-IIa/kra/Dscam2/sli/enok/egh/CG15019/LIMK1/Cul3/WASp/Alk/RunxA/nvy/DCTN1-p150/Elp3/RhoGEF2/side/Nrg/ago/CkIIalpha/Liprin-alpha/robo3/kuz/beat-Ic/velo/lva/bsk/TER94/beat-IIb/Dcr-1/otk/Tor/Ube3a/Cdc42	50
GO:0120039	GO:0120039	plasma membrane bounded cell projection morphogenesis	50/559	445/11257	4.3957e-08	8.14894e-06	6.64159e-06	TBCD/CG44153/stan/Dscam3/acj6/beat-VI/Dscam4/shn/zfh1/Lrrk/E(z)/DIP-gamma/Src64B/NiPp1/Src42A/CadN2/beat-IIa/kra/Dscam2/sli/enok/egh/CG15019/LIMK1/Cul3/WASp/Alk/RunxA/nvy/DCTN1-p150/Elp3/RhoGEF2/side/Nrg/ago/CkIIalpha/Liprin-alpha/robo3/kuz/beat-Ic/velo/lva/bsk/TER94/beat-IIb/Dcr-1/otk/Tor/Ube3a/Cdc42	50
GO:0098609	GO:0098609	cell-cell adhesion	23/559	127/11257	5.74374e-08	9.88744e-06	8.05851e-06	chp/CG44153/Nlg2/stan/Dscam3/beat-VI/Dscam4/fred/Src64B/Src42A/CadN2/beat-IIa/Dscam2/sli/egh/beat-IV/CG7166/Nlg4/Nrg/mop/beat-Ic/beat-IIb/kug	23
GO:0050808	GO:0050808	synapse organization	37/559	297/11257	2.08663e-07	2.51439e-05	2.04929e-05	dpr20/Nlg2/stan/RhoGAP68F/dpr10/nwk/Tbce/Lrrk/DIP-gamma/Src64B/mGluR/nonC/Src42A/ringer/Akt1/DIP-beta/Syx18/LIMK1/metro/WASp/Yif1/CG7166/Nlg4/dpr17/Elp3/Nrg/Arp3/dpr18/Tsc1/Liprin-alpha/htl/velo/DIP-delta/Fak/Tor/Ube3a/Cdc42	37
GO:0006935	GO:0006935	chemotaxis	36/559	291/11257	3.63528e-07	3.98228e-05	3.24566e-05	CG44153/stan/Dscam3/acj6/beat-VI/Dscam4/zfh1/E(z)/DIP-gamma/Src64B/NiPp1/Src42A/CadN2/beat-IIa/kra/Dscam2/sli/enok/egh/Alk/nvy/Elp3/side/Nrg/ago/CkIIalpha/Liprin-alpha/robo3/kuz/beat-Ic/velo/bsk/beat-IIb/otk/Tor/Cdc42	36
GO:0048589	GO:0048589	developmental growth	41/559	364/11257	7.10721e-07	7.15872e-05	5.83454e-05	Nup154/Nlg2/stan/RhoGAP68F/hyd/nwk/Tbce/dco/Src64B/Hr4/Src42A/lig/CadN2/ringer/Akt1/CG15019/LIMK1/metro/WASp/pcm/DCTN1-p150/Elp3/Sfmbt/RhoGEF2/Nrg/Arp3/ago/Tsc1/Sep2/Liprin-alpha/htl/kuz/Orct2/trbl/bsk/Fak/otk/Tor/Ube3a/kug/Cdc42	41
GO:0051236	GO:0051236	establishment of RNA localization	19/559	104/11257	7.12902e-07	7.15872e-05	5.83454e-05	Arc1/Srp72/Mys45A/Nup154/thoc5/Nup93-2/swm/Nup358/Hel25E/CG14712/egh/Mtor/Nup214/tsu/DCTN1-p150/Tom20/Nup98-96/thoc7/Dcr-1	19
GO:0032456	GO:0032456	endocytic recycling	10/559	32/11257	2.01344e-06	0.000186631	0.000152109	Vps53/RhoGAP68F/CG7956/Vps50/mop/CG18659/Snx3/Tor/CG8202/Vps52	10
GO:0050657	GO:0050657	nucleic acid transport	18/559	102/11257	2.35475e-06	0.000202677	0.000165187	Arc1/Srp72/Mys45A/Nup154/thoc5/Nup93-2/swm/Nup358/Hel25E/CG14712/egh/Mtor/Nup214/DCTN1-p150/Tom20/Nup98-96/thoc7/Dcr-1	18
GO:0050658	GO:0050658	RNA transport	18/559	102/11257	2.35475e-06	0.000202677	0.000165187	Arc1/Srp72/Mys45A/Nup154/thoc5/Nup93-2/swm/Nup358/Hel25E/CG14712/egh/Mtor/Nup214/DCTN1-p150/Tom20/Nup98-96/thoc7/Dcr-1	18
GO:1903321	GO:1903321	negative regulation of protein modification by small protein conjugation or removal	6/559	10/11257	2.58443e-06	0.000214775	0.000175047	Cand1/hyd/SCCRO4/ctrip/CG30496/Kdm2	6
GO:0040007	GO:0040007	growth	44/559	429/11257	3.55364e-06	0.000285476	0.00023267	mahj/Nup154/Nlg2/stan/RhoGAP68F/hyd/nwk/Tbce/dco/Src64B/Hr4/Src42A/lig/CadN2/ringer/Akt1/CG15019/LIMK1/metro/WASp/Alk/pcm/DCTN1-p150/Elp3/Sfmbt/RhoGEF2/Nrg/Arp3/ago/Tsc1/Sep2/mop/Liprin-alpha/htl/kuz/Orct2/trbl/bsk/Fak/otk/Tor/Ube3a/kug/Cdc42	44
GO:0022610	GO:0022610	biological adhesion	27/559	217/11257	9.57884e-06	0.000659572	0.000537568	chp/Megf8/CG44153/cora/Nlg2/stan/Dscam3/beat-VI/Dscam4/fred/mspo/Src64B/Src42A/CadN2/beat-IIa/Dscam2/sli/egh/beat-IV/CG7166/Nlg4/Nrg/mop/beat-Ic/beat-IIb/otk/kug	27
GO:0032386	GO:0032386	regulation of intracellular transport	13/559	65/11257	1.47327e-05	0.000934365	0.000761531	Nup154/RhoGAP68F/RanGAP/CG7956/CG3337/swm/Nup358/Mtor/Rint1/Nup214/Fs(2)Ket/Nup98-96/Snx3	13
GO:0044087	GO:0044087	regulation of cellular component biogenesis	35/559	334/11257	2.28571e-05	0.00137714	0.0011224	Ssrp/TBCD/stan/Lam/RhoGAP68F/Vps39/Arl2/nwk/Tbce/Lrrk/dco/Src64B/Src42A/ringer/Akt1/kra/metro/WASp/CG31715/Mtor/Cep97/pcm/tsu/Arp3/Nup98-96/htl/TER94/Arpc2/Fak/Mybbp1A/hop/Tor/Ube3a/kug/Cdc42	35
GO:0051168	GO:0051168	nuclear export	13/559	69/11257	2.88917e-05	0.00165783	0.00135118	Mys45A/Nup154/thoc5/RanGAP/Nup93-2/swm/Nup358/Hel25E/CG14712/Mtor/Nup214/Nup98-96/thoc7	13
GO:0032273	GO:0032273	positive regulation of protein polymerization	10/559	43/11257	3.64931e-05	0.0019758	0.00161033	Ssrp/Lam/Arl2/nwk/dco/ringer/WASp/Arp3/Nup98-96/Arpc2	10
GO:0051130	GO:0051130	positive regulation of cellular component organization	33/559	314/11257	3.68926e-05	0.0019758	0.00161033	Ssrp/stan/Lam/RhoGAP68F/Arl2/nwk/vih/dco/E(z)/Graf/ringer/Akt1/Ndf/kra/WASp/Mtor/Yif1/scny/DCTN1-p150/Arp3/Archease/AP-2alpha/Nup98-96/htl/Atac2/mlt/lva/Arpc2/Arf79F/hop/Tor/kug/Cdc42	33
GO:0050807	GO:0050807	regulation of synapse organization	21/559	159/11257	3.83008e-05	0.00200663	0.00163545	Nlg2/stan/RhoGAP68F/nwk/Tbce/Lrrk/DIP-gamma/Src64B/Src42A/ringer/Akt1/metro/WASp/Yif1/Arp3/Tsc1/htl/Fak/Tor/Ube3a/Cdc42	21
GO:0016318	GO:0016318	ommatidial rotation	8/559	29/11257	5.96998e-05	0.00293625	0.00239312	S/stan/CadN2/msk/sca/Tak1/hop/Cdc42	8
GO:0001738	GO:0001738	morphogenesis of a polarized epithelium	16/559	106/11257	6.36126e-05	0.00300601	0.00244997	S/stan/fwd/fred/dco/zip/CadN2/msk/sca/LIMK1/DCTN1-p150/Tak1/hop/otk/kug/Cdc42	16
GO:0051124	GO:0051124	synaptic growth at neuromuscular junction	19/559	141/11257	6.73861e-05	0.00312308	0.00254539	Nlg2/RhoGAP68F/nwk/Tbce/Src64B/Src42A/ringer/Akt1/LIMK1/metro/WASp/Elp3/Arp3/Liprin-alpha/htl/Fak/Tor/Ube3a/Cdc42	19
GO:0032535	GO:0032535	regulation of cellular component size	22/559	178/11257	7.02058e-05	0.00313041	0.00255137	Ssrp/stan/Lam/dop/nwk/dco/Src64B/Akt1/WASp/CG31715/Alk/Arp3/Tsc1/Liprin-alpha/Myt1/Nup98-96/kuz/trbl/Pex11/Arpc2/Tor/Cdc42	22
GO:0007164	GO:0007164	establishment of tissue polarity	15/559	96/11257	7.1441e-05	0.00313041	0.00255137	S/stan/fwd/fred/dco/zip/CadN2/msk/sca/LIMK1/Tak1/hop/otk/kug/Cdc42	15
GO:0007423	GO:0007423	sensory organ development	43/559	475/11257	9.48445e-05	0.00394095	0.00321198	chp/S/Nup154/salr/Asx/stan/Lam/gl/Afti/fred/Src64B/pad/Src42A/CadN2/msk/sw/shtd/rno/sca/LIMK1/Ns2/Cul3/WASp/PIG-V/X11L/Alk/nvy/kto/dos/DCTN1-p150/Arp3/CkIIalpha/Liprin-alpha/boss/Tak1/Arf79F/pelo/hop/cnk/Smyd4-4/Srrm1/so/Cdc42	43
GO:0048880	GO:0048880	sensory system development	37/559	390/11257	0.000113516	0.00440605	0.00359104	chp/S/Nup154/stan/Lam/gl/Afti/fred/Src64B/Src42A/CadN2/msk/sw/shtd/rno/sca/LIMK1/Ns2/Cul3/PIG-V/X11L/Alk/kto/dos/DCTN1-p150/CkIIalpha/Liprin-alpha/boss/Tak1/Arf79F/pelo/hop/cnk/Smyd4-4/Srrm1/so/Cdc42	37
GO:0008356	GO:0008356	asymmetric cell division	15/559	100/11257	0.000115179	0.00440605	0.00359104	TBCD/Arl2/cnn/Su(var)3-9/loco/CSN3/WASp/Mtor/mgr/AP-2alpha/Myt1/Sara/pelo/Tor/Cdc42	15
GO:0018193	GO:0018193	peptidyl-amino acid modification	37/559	392/11257	0.000126067	0.0047472	0.00386909	CG17075/TTLL5/CG9246/Stt3A/Gcn5/dop/CG3337/CG32944/Naa35/l(1)G0020/Lrrk/dco/Art7/E(z)/Src64B/CG32110/nonC/Su(var)3-9/Sgf29/Src42A/CG2911/Akt1/Ndf/Oga/enok/JIL-1/CG31278/Elp3/Asator/CkIIalpha/Atac2/CG8878/velo/NSD/Fak/hop/Ost48	37
GO:0007349	GO:0007349	cellularization	15/559	102/11257	0.000144709	0.00512865	0.00417998	cnn/dop/Src64B/sw/Cul3/DCTN1-p150/RhoGEF2/Sep2/nes/mlt/lva/TER94/Dcr-1/grp/Cdc42	15
GO:0090066	GO:0090066	regulation of anatomical structure size	26/559	241/11257	0.00016006	0.00543304	0.00442806	Ssrp/cora/stan/Lam/dop/nwk/dco/Src64B/zip/Akt1/WASp/pasi2/CG31715/Alk/Nrg/Arp3/Tsc1/Liprin-alpha/Myt1/Nup98-96/kuz/trbl/Pex11/Arpc2/Tor/Cdc42	26
GO:0034329	GO:0034329	cell junction assembly	25/559	228/11257	0.000165032	0.00552398	0.00450218	TBCD/Nlg2/stan/RhoGAP68F/nwk/Tbce/Src64B/Src42A/ringer/Akt1/loco/LIMK1/metro/WASp/pasi2/Nlg4/Elp3/Nrg/Arp3/Liprin-alpha/htl/Fak/Tor/Ube3a/Cdc42	25
GO:0051960	GO:0051960	regulation of nervous system development	35/559	369/11257	0.000173993	0.00574415	0.00468163	RIOK1/mor/stan/RhoGAP68F/nwk/Tbce/Lrrk/E(z)/Src64B/Src42A/ringer/Akt1/LIMK1/metro/WASp/Alk/IntS1/DCTN1-p150/Elp3/RhoGEF2/Arp3/ago/Archease/mop/Liprin-alpha/htl/kuz/CG13001/lva/bsk/Arf79F/Fak/Tor/Ube3a/Cdc42	35
GO:0048638	GO:0048638	regulation of developmental growth	25/559	229/11257	0.000176827	0.00575884	0.0046936	stan/RhoGAP68F/nwk/Tbce/Src64B/Hr4/Src42A/lig/ringer/Akt1/metro/WASp/pcm/Arp3/ago/Tsc1/Liprin-alpha/htl/kuz/Orct2/trbl/Fak/Tor/Ube3a/Cdc42	25
GO:0050803	GO:0050803	regulation of synapse structure or activity	22/559	190/11257	0.000184638	0.00593303	0.00483557	Nlg2/stan/RhoGAP68F/nwk/Tbce/Lrrk/DIP-gamma/Src64B/Src42A/ringer/Akt1/KaiR1D/metro/WASp/Yif1/Arp3/Tsc1/htl/Fak/Tor/Ube3a/Cdc42	22
GO:0007419	GO:0007419	ventral cord development	12/559	73/11257	0.00022855	0.00697222	0.00568253	pea/Surf6/Prp8/Nup358/loco/mute/ago/mop/robo3/htl/kuz/Pcl	12
GO:0051963	GO:0051963	regulation of synapse assembly	16/559	119/11257	0.000255467	0.00741776	0.00604566	stan/RhoGAP68F/nwk/Tbce/Src64B/Src42A/ringer/Akt1/metro/WASp/Arp3/htl/Fak/Tor/Ube3a/Cdc42	16
GO:0045666	GO:0045666	positive regulation of neuron differentiation	13/559	87/11257	0.000337273	0.00932798	0.00760254	stan/Src64B/Src42A/Akt1/IntS1/DCTN1-p150/Archease/mop/CG13001/lva/bsk/Arf79F/Tor	13
GO:0008283	GO:0008283	cell population proliferation	30/559	311/11257	0.00037597	0.0100091	0.00815767	RIOK1/CG5033/mor/TBCD/S/Nup154/Lam/Sin3A/Arl2/cnn/E(z)/Src64B/RyR/Nup358/Src42A/Akt1/loco/CSN3/enok/Cul3/mgr/ago/Tsc1/Myt1/htl/Dcr-1/hop/Tor/Adgf-A/Cdc42	30
GO:0030838	GO:0030838	positive regulation of actin filament polymerization	8/559	37/11257	0.000377937	0.0100091	0.00815767	Ssrp/Lam/nwk/dco/WASp/Arp3/Nup98-96/Arpc2	8
GO:0040008	GO:0040008	regulation of growth	29/559	301/11257	0.000477936	0.0116821	0.00952117	mahj/stan/RhoGAP68F/nwk/Tbce/dco/Src64B/Hr4/Src42A/lig/ringer/Akt1/metro/WASp/Alk/pcm/Arp3/ago/Tsc1/mop/Liprin-alpha/htl/kuz/Orct2/trbl/Fak/Tor/Ube3a/Cdc42	29
GO:0007268	GO:0007268	chemical synaptic transmission	28/559	287/11257	0.000487348	0.0116821	0.00952117	Exo70/Arc1/Nlg2/Arl2/nAChRbeta2/nwk/Tbce/Src64B/mGluR/nonC/nAChRalpha5/Src42A/Akt1/KaiR1D/nAChRalpha6/Syx18/stac/X11L/Alk/Nlg4/DCTN1-p150/stmA/mAChR-B/Gdi/Arf79F/nAChRalpha1/Cdc42/Lcch3	28
GO:0098916	GO:0098916	anterograde trans-synaptic signaling	28/559	287/11257	0.000487348	0.0116821	0.00952117	Exo70/Arc1/Nlg2/Arl2/nAChRbeta2/nwk/Tbce/Src64B/mGluR/nonC/nAChRalpha5/Src42A/Akt1/KaiR1D/nAChRalpha6/Syx18/stac/X11L/Alk/Nlg4/DCTN1-p150/stmA/mAChR-B/Gdi/Arf79F/nAChRalpha1/Cdc42/Lcch3	28
GO:0007623	GO:0007623	circadian rhythm	18/559	152/11257	0.000530177	0.012054	0.00982433	S/rho-5/Rnb/gl/ctrip/dco/Akt1/Oga/Cul3/nvy/CkIIalpha/Akap200/Rh7/hop/Ube3a/Srrm1/so/bgm	18
GO:0061024	GO:0061024	membrane organization	24/559	234/11257	0.000595727	0.0128188	0.0104476	Topors/Nlg2/Rtnl1/Lam/Vps39/Vps8/nwk/NimC4/Slc25A46a/MAN1/WASp/PIG-V/Rint1/Nlg4/Arp3/Tom20/CG13784/nes/AP-2alpha/bsk/TER94/Arf79F/Sec31/pelo	24
GO:0045595	GO:0045595	regulation of cell differentiation	37/559	426/11257	0.000643172	0.0134786	0.0109854	RIOK1/mor/Nup154/stan/Pax/mspo/zfh1/Lrrk/E(z)/Src64B/zip/Src42A/Akt1/enok/LIMK1/Alk/IntS1/tsu/DCTN1-p150/Elp3/RhoGEF2/ago/Tsc1/Archease/mop/Liprin-alpha/htl/kuz/CG13001/lva/bsk/vir/Ptpa/TER94/Arf79F/Tor/Cdc42	37
GO:0051258	GO:0051258	protein polymerization	14/559	105/11257	0.00066562	0.0137106	0.0111745	Ssrp/TBCD/Lam/Arl2/nwk/Tbce/dco/ringer/WASp/CG31715/Arp3/Nup98-96/Arpc2/Cdc42	14
GO:0002376	GO:0002376	immune system process	38/559	444/11257	0.000721722	0.0146164	0.0119127	Vps15/CG5033/mor/Tep4/Lam/casp/Sin3A/zfh1/RhoGEF3/E(bx)/Src64B/Als2/RyR/Mtr4/Src42A/Akt1/Rrp6/CYLD/scny/DCTN1-p150/Elp3/Nrg/Tsc1/mop/Nup98-96/htl/kuz/bsk/Tak1/Pitslre/Arf79F/Sec31/hop/cnk/Tor/kug/Adgf-A/Cdc42	38
GO:0010498	GO:0010498	proteasomal protein catabolic process	25/559	252/11257	0.00075472	0.0151573	0.0123536	CG7546/pic/Hrd3/Rpn5/vih/dco/shtd/CG17019/Cul3/CG1317/scny/Cul4/ago/CkIIalpha/Rpn11/CG31633/trbl/CG15814/Kdm2/TER94/Prosbeta2/Prosbeta4/CG9945/Tor/Ube3a	25
GO:0006338	GO:0006338	chromatin remodeling	16/559	132/11257	0.000824583	0.0161565	0.0131679	mor/Nlp/Gcn5/CG6204/E(bx)/Su(var)3-9/Sgf29/Hel25E/Mtor/CG43902/Nap1/Atac2/Hira/CG18004/hop/Dp1	16
GO:0090175	GO:0090175	regulation of establishment of planar polarity	6/559	24/11257	0.00091191	0.0175703	0.0143202	stan/fwd/fred/dco/zip/Tak1	6
GO:0022603	GO:0022603	regulation of anatomical structure morphogenesis	26/559	270/11257	0.000929847	0.0175703	0.0143202	stan/Pax/fwd/fred/shn/mspo/Lrrk/dco/Src64B/zip/Src42A/LIMK1/Cul3/WASp/DCTN1-p150/Elp3/RhoGEF2/Liprin-alpha/htl/kuz/lva/Tak1/Arpc2/hop/Tor/Cdc42	26
GO:0034504	GO:0034504	protein localization to nucleus	10/559	63/11257	0.000995682	0.0179074	0.014595	Nup154/Lam/Nup93-2/Nup358/msk/CG14712/Mtor/Nup214/Fs(2)Ket/Nup98-96	10
GO:0042461	GO:0042461	photoreceptor cell development	14/559	110/11257	0.00106196	0.0188186	0.0153376	chp/stan/cnn/Afti/CadN2/msk/rno/PIG-V/Alk/dos/DCTN1-p150/Liprin-alpha/boss/Smyd4-4	14
GO:0016049	GO:0016049	cell growth	17/559	150/11257	0.00123082	0.0214297	0.0174658	Nup154/stan/dco/CadN2/Akt1/CG15019/DCTN1-p150/RhoGEF2/Nrg/Tsc1/Liprin-alpha/htl/kuz/Orct2/bsk/Tor/Cdc42	17
GO:0006606	GO:0006606	protein import into nucleus	9/559	54/11257	0.00123599	0.0214297	0.0174658	Nup154/Nup93-2/Nup358/msk/CG14712/Mtor/Nup214/Fs(2)Ket/Nup98-96	9
GO:0010948	GO:0010948	negative regulation of cell cycle process	10/559	65/11257	0.00127604	0.0219661	0.0179029	nbs/mre11/mor/pch2/Mtor/Rint1/Cep97/Brca2/trbl/grp	10
GO:0023057	GO:0023057	negative regulation of signaling	31/559	352/11257	0.00138833	0.0232685	0.0189644	Nle/Nlg2/rho-5/Dlg5/casp/Sin3A/pic/dco/E(bx)/Hr4/Graf/Src42A/MAN1/lig/Akt1/rno/CYLD/CG17019/Cul3/Alk/scny/Cul4/Tsc1/trbl/Pp2A-29B/TER94/Fak/otk/Ube3a/Samtor/cos	31
GO:0048588	GO:0048588	developmental cell growth	11/559	77/11257	0.00138992	0.0232685	0.0189644	Nup154/stan/CadN2/CG15019/DCTN1-p150/Nrg/Liprin-alpha/htl/kuz/bsk/Cdc42	11
GO:0048285	GO:0048285	organelle fission	29/559	322/11257	0.00139413	0.0232685	0.0189644	Topors/Nup154/thoc5/Lam/RanGAP/hyd/fwd/vih/Slc25A46a/shtd/pch2/rec/Mtor/mgr/Rint1/bel/DCTN1-p150/ago/mei-9/Myt1/SA/Hira/Brca2/trbl/lva/Pex11/Arf79F/pelo/Cap-G	29
GO:0000278	GO:0000278	mitotic cell cycle	40/559	492/11257	0.00141464	0.0232685	0.0189644	nbs/mre11/mor/Map205/TBCD/CG3436/Rad9/Asx/Lam/Sin3A/Arl2/cnn/vih/E(z)/zip/Rrp6/shtd/Mtor/mgr/Rint1/bel/DCTN1-p150/stmA/ago/CkIIalpha/Sep2/Fs(2)Ket/AP-2alpha/Myt1/SA/Hira/trbl/lva/Ptpa/Pitslre/Arf79F/Dcr-1/grp/Cap-G/Tor	40
GO:0032200	GO:0032200	telomere organization	7/559	35/11257	0.00143037	0.0232685	0.0189644	nbs/mre11/Ku80/nonC/JIL-1/Nap1/tea	7
GO:0008154	GO:0008154	actin polymerization or depolymerization	11/559	78/11257	0.0015474	0.0245344	0.0199961	Ssrp/Lam/nwk/dco/Src64B/WASp/CG31715/Arp3/Nup98-96/Arpc2/Cdc42	11
GO:0032970	GO:0032970	regulation of actin filament-based process	14/559	115/11257	0.00164009	0.0255008	0.0207838	Ssrp/Lam/RhoGAP68F/nwk/dco/Src64B/WASp/CG31715/RhoGEF2/Arp3/Akap200/Nup98-96/Arpc2/Cdc42	14
GO:0051240	GO:0051240	positive regulation of multicellular organismal process	27/559	299/11257	0.00193651	0.0289875	0.0236255	RIOK1/Nup154/rho-5/stan/RhoGAP68F/Src64B/zip/Hr4/Src42A/Akt1/IntS1/pcm/scny/DCTN1-p150/Arp3/Archease/mop/htl/kuz/CG13001/Orct2/lva/bsk/vir/Arf79F/Tor/bgm	27
GO:0031057	GO:0031057	negative regulation of histone modification	4/559	12/11257	0.00216318	0.0314053	0.0255961	CG9246/hyd/ctrip/Kdm2	4
GO:0006997	GO:0006997	nucleus organization	11/559	82/11257	0.00233002	0.0328711	0.0267908	Topors/Lam/hyd/Nlp/Nup93-2/Nup358/MAN1/msk/Nap1/Hira/pelo	11
GO:0010648	GO:0010648	negative regulation of cell communication	30/559	351/11257	0.0026008	0.0346294	0.0282238	Nle/Nlg2/rho-5/Dlg5/casp/Sin3A/pic/dco/E(bx)/Hr4/Graf/Src42A/MAN1/lig/Akt1/rno/CYLD/CG17019/Cul3/Alk/scny/Cul4/Tsc1/trbl/Pp2A-29B/TER94/otk/Ube3a/Samtor/cos	30
GO:0016569	GO:0016569	covalent chromatin modification	20/559	204/11257	0.002828	0.0370785	0.0302199	CG9246/Asx/hyd/Gcn5/l(1)G0020/ctrip/E(z)/Su(var)3-9/Fib/Sgf29/Ndf/Oga/enok/JIL-1/scny/Elp3/Atac2/Sirt2/Kdm2/NSD	20
GO:0048232	GO:0048232	male gamete generation	26/559	293/11257	0.00296021	0.0373051	0.0304046	Topors/Tudor-SN/Nup154/thoc5/Lam/Prp8/hyd/fwd/E(bx)/sw/CSN3/Cul3/WASp/Mtor/Rint1/pcm/bel/Nap1/nes/Myt1/ste24b/mlt/Arf79F/pelo/so/Cdc42	26
GO:0007167	GO:0007167	enzyme linked receptor protein signaling pathway	25/559	278/11257	0.00296152	0.0373051	0.0304046	rho-5/shn/Src64B/Graf/Src42A/MAN1/Akt1/rno/CG34357/Cul3/Alk/dos/CG31183/Tsc1/mop/boss/htl/trbl/Pp2A-29B/bsk/cnk/Tor/Ube3a/Ddr/Cdc42	25
GO:1903046	GO:1903046	meiotic cell cycle process	20/559	205/11257	0.00299289	0.0373051	0.0304046	mre11/Topors/Nup154/thoc5/Lam/RanGAP/hyd/fwd/Src64B/baf/pch2/rec/mgr/Rint1/mei-9/Myt1/SA/Brca2/Arf79F/pelo	20
GO:0045196	GO:0045196	establishment or maintenance of neuroblast polarity	4/559	13/11257	0.00300298	0.0373051	0.0304046	TBCD/Arl2/mgr/Cdc42	4
GO:0009968	GO:0009968	negative regulation of signal transduction	28/559	325/11257	0.00318344	0.0387479	0.0315805	Nle/rho-5/Dlg5/casp/Sin3A/pic/dco/E(bx)/Hr4/Graf/Src42A/MAN1/lig/Akt1/rno/CYLD/CG17019/Cul3/scny/Cul4/Tsc1/trbl/Pp2A-29B/TER94/otk/Ube3a/Samtor/cos	28
GO:0017038	GO:0017038	protein import	12/559	99/11257	0.00356678	0.042137	0.0343427	Topors/Nup154/Nup93-2/Nup358/msk/Tim17b/CG14712/Mtor/Nup214/Tom20/Fs(2)Ket/Nup98-96	12
GO:0050684	GO:0050684	regulation of mRNA processing	13/559	112/11257	0.00361883	0.0425433	0.0346739	pea/obe/CG5728/CG2926/swm/Hel25E/mod/CG2931/tsu/x16/vir/CG3335/Srrm1	13
GO:0048488	GO:0048488	synaptic vesicle endocytosis	7/559	41/11257	0.00369707	0.0428362	0.0349126	Nlg2/Arl2/Lrrk/Nlg4/stmA/AP-2alpha/Arf79F	7
GO:0140238	GO:0140238	presynaptic endocytosis	7/559	41/11257	0.00369707	0.0428362	0.0349126	Nlg2/Arl2/Lrrk/Nlg4/stmA/AP-2alpha/Arf79F	7
GO:0060249	GO:0060249	anatomical structure homeostasis	17/559	167/11257	0.00387644	0.0442759	0.0360859	nbs/mre11/Vps15/l(2)k09848/Ku80/zfh1/zip/nonC/nAChRalpha6/JIL-1/Mtor/mute/Nap1/boss/tea/TER94/bgm	17
GO:0006998	GO:0006998	nuclear envelope organization	4/559	14/11257	0.00404084	0.0457203	0.0372632	Topors/Lam/MAN1/pelo	4
GO:0030855	GO:0030855	epithelial cell differentiation	32/559	394/11257	0.00418134	0.0458653	0.0373813	Ssrp/S/cora/Dlg5/Pax/pic/dop/Src64B/zip/lig/Akt1/squ/loco/kra/egh/LIMK1/WASp/DCTN1-p150/RhoGEF2/Cul4/Tsc1/mop/Fs(2)Ket/AP-2alpha/kuz/bsk/vir/hop/cos/kug/orb/Cdc42	32
GO:0002520	GO:0002520	immune system development	12/559	101/11257	0.0042059	0.0458653	0.0373813	zfh1/E(bx)/Elp3/Tsc1/Nup98-96/htl/kuz/Arf79F/hop/Tor/Adgf-A/Cdc42	12
GO:0048534	GO:0048534	hematopoietic or lymphoid organ development	12/559	101/11257	0.0042059	0.0458653	0.0373813	zfh1/E(bx)/Elp3/Tsc1/Nup98-96/htl/kuz/Arf79F/hop/Tor/Adgf-A/Cdc42	12
GO:0048585	GO:0048585	negative regulation of response to stimulus	31/559	379/11257	0.00430876	0.0463577	0.0377827	Nle/rho-5/Dlg5/Lam/casp/Sin3A/pic/dco/E(bx)/Hr4/Graf/Su(var)3-9/Src42A/MAN1/lig/Akt1/rno/CYLD/CG17019/Cul3/scny/Cul4/ago/Tsc1/trbl/Pp2A-29B/TER94/otk/Ube3a/Samtor/cos	31
GO:0051049	GO:0051049	regulation of transport	25/559	288/11257	0.00469252	0.0491695	0.0400743	S/Nup154/rho-5/RhoGAP68F/RanGAP/Vps39/CG7956/CG3337/Lrrk/dco/Graf/swm/Nup358/Akt1/RabX4/Mtor/Rint1/Teh1/Nup214/mop/Fs(2)Ket/AP-2alpha/Nup98-96/Snx3/Arf79F	25
GO:0007549	GO:0007549	dosage compensation	5/559	23/11257	0.00473625	0.0494128	0.0402727	dop/Ndf/Mtor/Spt5/vir	5
GO:0007163	GO:0007163	establishment or maintenance of cell polarity	19/559	200/11257	0.00502305	0.0506508	0.0412817	Vps15/TBCD/S/stan/Arl2/lig/CadN2/msk/loco/egh/sca/mgr/DCTN1-p150/AnxB9/Tak1/hop/kug/orb/Cdc42	19
GO:0042752	GO:0042752	regulation of circadian rhythm	11/559	91/11257	0.00527596	0.0525294	0.0428128	S/rho-5/Rnb/gl/ctrip/dco/Cul3/Rh7/Srrm1/so/bgm	11
GO:0014070	GO:0014070	response to organic cyclic compound	12/559	104/11257	0.00533362	0.0526804	0.0429359	nbs/jnj/dco/E(bx)/Hr4/SMC5/kto/bel/Tsc1/Nup98-96/Brca2/MED24	12
GO:0008037	GO:0008037	cell recognition	13/559	118/11257	0.00565855	0.0547675	0.0446369	CG44153/stan/Dscam3/acj6/Dscam4/zfh1/kra/Dscam2/sli/WASp/Arp3/robo3/beat-Ic	13
GO:0045165	GO:0045165	cell fate commitment	27/559	324/11257	0.00584015	0.056299	0.0458851	TBCD/S/Asx/gl/Arl2/cnn/Src64B/Src42A/msk/loco/egh/Cul3/WASp/mgr/dos/tsu/DCTN1-p150/CkIIalpha/mei-9/boss/htl/kuz/Ptpa/Sara/Dcr-1/cnk/Cdc42	27
GO:0030707	GO:0030707	ovarian follicle cell development	26/559	309/11257	0.00597242	0.0571172	0.0465519	Ssrp/S/Dlg5/Pax/pic/dop/Src64B/zip/lig/Akt1/squ/loco/kra/egh/Cul4/mop/Fs(2)Ket/AP-2alpha/kuz/bsk/vir/hop/cos/kug/orb/Cdc42	26
GO:0035220	GO:0035220	wing disc development	30/559	372/11257	0.00602626	0.0572678	0.0466747	mor/Nop60B/S/cora/Nup154/salr/Asx/Sin3A/hyd/Pax/pic/dop/shn/lgs/zip/Src42A/msk/sca/LIMK1/Cul3/Psn/pcm/RhoGEF2/AnxB9/Tak1/Snx3/hop/cnk/cos/Cdc42	30
GO:0097305	GO:0097305	response to alcohol	13/559	119/11257	0.00607377	0.0572678	0.0466747	S/Ku80/E(bx)/Hr4/kra/sca/kto/bel/Bacc/Akap200/Nup98-96/Brca2/MED24	13
GO:0044818	GO:0044818	mitotic G2/M transition checkpoint	4/559	16/11257	0.00678867	0.061276	0.0499415	nbs/mre11/Rint1/grp	4
GO:0060857	GO:0060857	establishment of glial blood-brain barrier	4/559	16/11257	0.00678867	0.061276	0.0499415	cora/loco/pasi2/Nrg	4
GO:0006974	GO:0006974	cellular response to DNA damage stimulus	21/559	237/11257	0.00727595	0.0634224	0.0516908	nbs/jnj/CG7376/Marcal1/mre11/Rad9/mus201/Ku80/hyd/DNApol-zeta/pic/koi/ctrip/nonC/DNApol-theta/SMC5/Rint1/Cul4/mei-9/Brca2/grp	21
GO:0009894	GO:0009894	regulation of catabolic process	21/559	240/11257	0.00835442	0.0708949	0.0577811	Pax/pic/Lrrk/ctrip/vih/dco/Akt1/CG8270/scny/Cul4/ago/CkIIalpha/Tsc1/AP-2alpha/trbl/bsk/Tak1/TER94/MTPAP/Tor/CG3632	21
GO:0002682	GO:0002682	regulation of immune system process	20/559	227/11257	0.00922006	0.0761003	0.0620237	Vps15/CG5033/mor/Lam/casp/Sin3A/E(bx)/RyR/Akt1/CYLD/scny/mop/Nup98-96/htl/Tak1/Pitslre/Arf79F/Sec31/hop/kug	20
GO:0043279	GO:0043279	response to alkaloid	5/559	27/11257	0.00965007	0.0788362	0.0642535	nbs/jnj/dco/SMC5/Brca2	5
GO:0032259	GO:0032259	methylation	14/559	140/11257	0.00970311	0.0790017	0.0643883	Nopp140/CG8939/CG3337/Art7/E(z)/Su(var)3-9/Fib/CG7009/CG7544/CG8545/vir/Kdm2/NSD/CG18048	14
GO:0032886	GO:0032886	regulation of microtubule-based process	9/559	73/11257	0.00981876	0.0796741	0.0649364	TBCD/Lam/Arl2/cnn/Lrrk/Mtor/Cep97/CG8031/mlt	9
GO:0034661	GO:0034661	ncRNA catabolic process	4/559	18/11257	0.0105497	0.0841879	0.0686153	Rrp6/pcm/pelo/MTPAP	4
GO:0051094	GO:0051094	positive regulation of developmental process	24/559	293/11257	0.0110433	0.0860227	0.0701107	RIOK1/stan/RhoGAP68F/Src64B/zip/Hr4/Src42A/Akt1/IntS1/pcm/scny/DCTN1-p150/Arp3/Archease/mop/htl/kuz/CG13001/Orct2/lva/bsk/vir/Arf79F/Tor	24
GO:0051247	GO:0051247	positive regulation of protein metabolic process	24/559	293/11257	0.0110433	0.0860227	0.0701107	CG9062/SCCRO4/pic/ctrip/vih/dco/E(z)/Src64B/RpIIIC160/Src42A/Ndf/Cul3/Alk/scny/Cul4/Atac2/CG10075/trbl/Tak1/TER94/cnk/Tor/Dp1/Cdc42	24
GO:1901698	GO:1901698	response to nitrogen compound	18/559	201/11257	0.0111938	0.0860227	0.0701107	nbs/jnj/CG7546/Hrd3/dco/SMC5/Akt1/RabX4/CG1317/TyrR/Tsc1/mAChR-B/Brca2/trbl/Pp2A-29B/CG15814/cnk/Tor	18
GO:0006509	GO:0006509	membrane protein ectodomain proteolysis	3/559	10/11257	0.0112469	0.0860227	0.0701107	Tace/Psn/kuz	3
GO:0048142	GO:0048142	germarium-derived cystoblast division	3/559	10/11257	0.0112469	0.0860227	0.0701107	CSN3/Myt1/Tor	3
GO:0060142	GO:0060142	regulation of syncytium formation by plasma membrane fusion	3/559	10/11257	0.0112469	0.0860227	0.0701107	Pax/mspo/zip	3
GO:1901739	GO:1901739	regulation of myoblast fusion	3/559	10/11257	0.0112469	0.0860227	0.0701107	Pax/mspo/zip	3
GO:0007098	GO:0007098	centrosome cycle	9/559	75/11257	0.0116444	0.088527	0.0721517	Topors/Map205/cnn/mgr/Cep97/DCTN1-p150/Rcd1/Pp2A-29B/grp	9
GO:0016458	GO:0016458	gene silencing	18/559	202/11257	0.0117422	0.0889314	0.0724813	Tudor-SN/Lam/E(z)/Su(var)3-9/squ/JIL-1/pcm/scny/bel/Sfmbt/Helz/Odj/Hira/Nbr/NSD/HPS1/pelo/Dcr-1	18
GO:0006914	GO:0006914	autophagy	17/559	188/11257	0.0123088	0.0924119	0.075318	Vps15/Vps39/Pax/Lrrk/CG8270/Atg18b/scny/ago/Vps13D/Tsc1/AP-2alpha/Pp2A-29B/bsk/Tak1/TER94/Tor/CG3632	17
GO:0061919	GO:0061919	process utilizing autophagic mechanism	17/559	188/11257	0.0123088	0.0924119	0.075318	Vps15/Vps39/Pax/Lrrk/CG8270/Atg18b/scny/ago/Vps13D/Tsc1/AP-2alpha/Pp2A-29B/bsk/Tak1/TER94/Tor/CG3632	17
GO:0060560	GO:0060560	developmental growth involved in morphogenesis	11/559	103/11257	0.0130721	0.0958604	0.0781286	stan/CadN2/CG15019/DCTN1-p150/RhoGEF2/Nrg/Liprin-alpha/kuz/bsk/otk/Cdc42	11
GO:0035011	GO:0035011	melanotic encapsulation of foreign target	5/559	29/11257	0.0130863	0.0958604	0.0781286	RhoGEF3/Als2/DCTN1-p150/Nrg/Cdc42	5
GO:0045500	GO:0045500	sevenless signaling pathway	5/559	29/11257	0.0130863	0.0958604	0.0781286	Src64B/Src42A/dos/boss/cnk	5
GO:0098781	GO:0098781	ncRNA transcription	5/559	29/11257	0.0130863	0.0958604	0.0781286	Tif-IA/Ice1/RpIIIC160/CG7099/Mybbp1A	5
GO:0032101	GO:0032101	regulation of response to external stimulus	20/559	235/11257	0.0131771	0.0962324	0.0784318	Vps15/mor/stan/casp/E(bx)/Akt1/CYLD/sli/scny/Elp3/Archease/mop/Liprin-alpha/Nup98-96/htl/Tak1/Pitslre/Sec31/Tor/kug	20
GO:0042063	GO:0042063	gliogenesis	10/559	90/11257	0.0135363	0.0982605	0.0800848	RIOK1/cora/loco/sli/pasi2/Nrg/ago/htl/kuz/so	10
GO:0040017	GO:0040017	positive regulation of locomotion	9/559	77/11257	0.0137125	0.0992408	0.0808838	stan/zip/Akt1/sli/htl/kuz/bsk/vir/Tor	9
GO:0010632	GO:0010632	regulation of epithelial cell migration	7/559	52/11257	0.0137753	0.0993964	0.0810105	Sin3A/zip/Akt1/sli/kuz/bsk/vir	7

## Sheet: 5h_down_only
	ID	Description	GeneRatio	BgRatio	pvalue	p.adjust	qvalue	geneID	Count
GO:0007480	GO:0007480	imaginal disc-derived leg morphogenesis	5/70	75/11257	9.9085e-05	0.0578777	0.0535757	Sp1/bowl/Dl/Dll/fj	5
GO:0007478	GO:0007478	leg disc morphogenesis	5/70	79/11257	0.000126925	0.0578777	0.0535757	Sp1/bowl/Dl/Dll/fj	5
GO:0035218	GO:0035218	leg disc development	5/70	100/11257	0.000383365	0.0709982	0.0657209	Sp1/bowl/Dl/Dll/fj	5
GO:0035285	GO:0035285	appendage segmentation	3/70	24/11257	0.000424419	0.0709982	0.0657209	bowl/Dl/fj	3
GO:0035220	GO:0035220	wing disc development	9/70	372/11257	0.000467093	0.0709982	0.0657209	dpy/bowl/inv/CG30069/Dl/Dll/fj/Irk1/bbg	9
GO:0048737	GO:0048737	imaginal disc-derived appendage development	8/70	326/11257	0.000898202	0.0724347	0.0670505	Sp1/dpy/bowl/inv/Dl/Dll/fj/bbg	8
GO:0035239	GO:0035239	tube morphogenesis	10/70	497/11257	0.000939924	0.0724347	0.0670505	Sp1/dpy/bowl/inv/raw/Dl/Dll/fj/grh/bbg	10

## Sheet: D30_down_only
	ID	Description	GeneRatio	BgRatio	pvalue	p.adjust	qvalue	geneID	Count
GO:0015672	GO:0015672	monovalent inorganic cation transport	14/148	212/11257	7.32714e-07	0.000913694	0.000818325	ine/Nckx30C/KCNQ/OtopLc/CG32669/CG1090/ATPsyngamma/CG4928/CG42594/ATPsynB/CG3078/Ork1/VhaM9.7-a/blw	14
GO:0034220	GO:0034220	ion transmembrane transport	16/148	348/11257	1.32067e-05	0.00823438	0.0073749	ine/Nckx30C/CG12531/KCNQ/OtopLc/porin/CG1090/kcc/ATPsyngamma/CG13248/CG42594/ATPsynB/Ork1/VhaM9.7-a/blw/CG9396	16
GO:0098662	GO:0098662	inorganic cation transmembrane transport	11/148	237/11257	0.000289507	0.0902539	0.0808335	ine/Nckx30C/KCNQ/OtopLc/CG1090/ATPsyngamma/CG42594/ATPsynB/Ork1/VhaM9.7-a/blw	11
GO:0097479	GO:0097479	synaptic vesicle localization	4/148	27/11257	0.000397876	0.0992303	0.0888729	Fife/Aplip1/shi/lap	4

## Sheet: 3hvsD30_down
	ID	Description	GeneRatio	BgRatio	pvalue	p.adjust	qvalue	geneID	Count
GO:0042391	GO:0042391	regulation of membrane potential	7/68	83/11257	6.18126e-07	0.000581656	0.000521178	NaCP60E/nAChRbeta1/para/Ca-alpha1T/GluClalpha/Ih/nAChRalpha7	7
GO:0098742	GO:0098742	cell-cell adhesion via plasma-membrane adhesion molecules	6/68	69/11257	3.45061e-06	0.00162351	0.0014547	beat-IIIb/mys/tutl/Con/sns/beat-Ib	6
GO:0042330	GO:0042330	taxis	11/68	348/11257	6.65474e-06	0.00208737	0.00187033	beat-IIIb/mys/tutl/CG34353/Con/CdGAPr/Dop1R1/dpr11/beat-Ib/NetB/dock	11
GO:0007626	GO:0007626	locomotory behavior	8/68	184/11257	1.40025e-05	0.00219606	0.00196773	Ac3/unc79/unc80/tutl/Ms/Ih/nAChRalpha7/na	8
GO:0019935	GO:0019935	cyclic-nucleotide-mediated signaling	5/68	67/11257	5.0081e-05	0.00503927	0.0045153	Ac3/Cngl/CG42260/Octbeta1R/Dop1R1	5
GO:0019932	GO:0019932	second-messenger-mediated signaling	6/68	111/11257	5.34454e-05	0.00503927	0.0045153	Ac3/Cngl/trpl/CG42260/Octbeta1R/Dop1R1	6
GO:0045475	GO:0045475	locomotor rhythm	5/68	69/11257	5.77384e-05	0.00503927	0.0045153	Ac3/unc79/unc80/Ih/na	5
GO:0019226	GO:0019226	transmission of nerve impulse	3/68	17/11257	0.000134936	0.00976728	0.00875171	NaCP60E/para/Ca-alpha1T	3
GO:0035637	GO:0035637	multicellular organismal signaling	3/68	17/11257	0.000134936	0.00976728	0.00875171	NaCP60E/para/Ca-alpha1T	3
GO:0061564	GO:0061564	axon development	9/68	348/11257	0.000229217	0.0145647	0.0130503	beat-IIIb/mys/tutl/Con/CdGAPr/dpr11/beat-Ib/NetB/dock	9
GO:0007411	GO:0007411	axon guidance	8/68	275/11257	0.000237868	0.0145647	0.0130503	beat-IIIb/mys/tutl/CdGAPr/dpr11/beat-Ib/NetB/dock	8
GO:0097485	GO:0097485	neuron projection guidance	8/68	283/11257	0.000288852	0.0145647	0.0130503	beat-IIIb/mys/tutl/CdGAPr/dpr11/beat-Ib/NetB/dock	8
GO:0007268	GO:0007268	chemical synaptic transmission	8/68	287/11257	0.000317517	0.0145647	0.0130503	gammaSnap1/nAChRbeta1/Sec8/Nlg3/Dop1R1/GluClalpha/Ih/nAChRalpha7	8
GO:0098916	GO:0098916	anterograde trans-synaptic signaling	8/68	287/11257	0.000317517	0.0145647	0.0130503	gammaSnap1/nAChRbeta1/Sec8/Nlg3/Dop1R1/GluClalpha/Ih/nAChRalpha7	8
GO:0022610	GO:0022610	biological adhesion	7/68	217/11257	0.00032102	0.0145647	0.0130503	beat-IIIb/mys/tutl/Con/sns/Nlg3/beat-Ib	7
GO:0099537	GO:0099537	trans-synaptic signaling	8/68	288/11257	0.000325036	0.0145647	0.0130503	gammaSnap1/nAChRbeta1/Sec8/Nlg3/Dop1R1/GluClalpha/Ih/nAChRalpha7	8
GO:0007188	GO:0007188	adenylate cyclase-modulating G protein-coupled receptor signaling pathway	4/68	57/11257	0.000378054	0.0152948	0.0137045	Ac3/Octbeta1R/Octalpha2R/Dop1R1	4
GO:0007632	GO:0007632	visual behavior	3/68	24/11257	0.000389656	0.0152948	0.0137045	Dop1R1/Ih/nAChRalpha7	3
GO:0006812	GO:0006812	cation transport	9/68	374/11257	0.000390089	0.0152948	0.0137045	Cngl/trpl/CG42260/NaCP60E/CG42235/para/Ca-alpha1T/Ih/nAChRalpha7	9
GO:0046903	GO:0046903	secretion	7/68	252/11257	0.00078504	0.0254732	0.0228246	trpl/gammaSnap1/Sec8/Glut1/jar/Ih/ru	7
GO:1903532	GO:1903532	positive regulation of secretion by cell	3/68	32/11257	0.00092247	0.0280014	0.0250899	Glut1/jar/ru	3
GO:0034220	GO:0034220	ion transmembrane transport	8/68	348/11257	0.00112876	0.0321868	0.0288401	trpl/CG13743/NaCP60E/nAChRbeta1/para/Ca-alpha1T/GluClalpha/nAChRalpha7	8
GO:0034330	GO:0034330	cell junction organization	8/68	366/11257	0.00155704	0.0420389	0.0376678	mys/Sec8/sns/Octbeta1R/Nlg3/jar/dpr11/Pi4KIIIalpha	8
GO:0008344	GO:0008344	adult locomotory behavior	4/68	83/11257	0.00156361	0.0420389	0.0376678	tutl/Ms/nAChRalpha7/na	4
GO:0007623	GO:0007623	circadian rhythm	5/68	152/11257	0.0022108	0.0523955	0.0469476	Ac3/unc79/unc80/Ih/na	5
GO:0048511	GO:0048511	rhythmic process	5/68	153/11257	0.00227494	0.0523955	0.0469476	Ac3/unc79/unc80/Ih/na	5
GO:0032940	GO:0032940	secretion by cell	6/68	229/11257	0.00253875	0.0550004	0.0492817	gammaSnap1/Sec8/Glut1/jar/Ih/ru	6
GO:0050975	GO:0050975	sensory perception of touch	2/68	13/11257	0.00268657	0.0550004	0.0492817	Nmdar2/na	2
GO:0050807	GO:0050807	regulation of synapse organization	5/68	159/11257	0.00268865	0.0550004	0.0492817	mys/Sec8/Octbeta1R/dpr11/Pi4KIIIalpha	5
GO:0007638	GO:0007638	mechanosensory behavior	2/68	14/11257	0.00312214	0.0599365	0.0537045	tutl/para	2
GO:0008039	GO:0008039	synaptic target recognition	3/68	49/11257	0.00318472	0.0599365	0.0537045	tutl/Con/NetB	3
GO:0010631	GO:0010631	epithelial cell migration	5/68	168/11257	0.00340811	0.062883	0.0563446	sr/mys/Sec8/jar/ru	5
GO:0090132	GO:0090132	epithelium migration	5/68	169/11257	0.00349582	0.063261	0.0566833	sr/mys/Sec8/jar/ru	5
GO:0050878	GO:0050878	regulation of body fluid levels	2/68	15/11257	0.00358846	0.0637121	0.0570875	Hml/trpl	2
GO:0042493	GO:0042493	response to drug	2/68	18/11257	0.00516818	0.0785295	0.0703642	unc79/na	2
GO:0048858	GO:0048858	cell projection morphogenesis	8/68	445/11257	0.0051741	0.0785295	0.0703642	beat-IIIb/mys/tutl/CdGAPr/dpr11/beat-Ib/NetB/dock	8
GO:0120039	GO:0120039	plasma membrane bounded cell projection morphogenesis	8/68	445/11257	0.0051741	0.0785295	0.0703642	beat-IIIb/mys/tutl/CdGAPr/dpr11/beat-Ib/NetB/dock	8
GO:0050803	GO:0050803	regulation of synapse structure or activity	5/68	190/11257	0.00573675	0.0819839	0.0734595	mys/Sec8/Octbeta1R/dpr11/Pi4KIIIalpha	5
GO:0006836	GO:0006836	neurotransmitter transport	4/68	126/11257	0.00701798	0.098566	0.0883174	gammaSnap1/Sec8/CG43066/Ih	4

## Sheet: 5hvsD30_down
	ID	Description	GeneRatio	BgRatio	pvalue	p.adjust	qvalue	geneID	Count
GO:0010631	GO:0010631	epithelial cell migration	5/39	168/11257	0.000266366	0.0819408	0.0741185	sr/Sec8/jar/fz/ru	5
GO:0090132	GO:0090132	epithelium migration	5/39	169/11257	0.000273796	0.0819408	0.0741185	sr/Sec8/jar/fz/ru	5
GO:0090130	GO:0090130	tissue migration	5/39	177/11257	0.000339065	0.0819408	0.0741185	sr/Sec8/jar/fz/ru	5
